# Supplementary material for: Age- and stress-associated C. elegans granulins impair lysosomal function and induce a compensatory HLH-30/TFEB transcriptional response
Source: PLoS Genet. 2019 Aug 9;15(8):e1008295. doi: 10.1371/journal.pgen.1008295 (PMC6703691; doi:10.1371/journal.pgen.1008295)
Supplement: S1 Table — (See corresponding Excel file). (XLSX) [file pgen.1008295.s007.xlsx]

## Sheet: Contents
N2	wildtype (WT)
CF3050	pgrn-1(-)
AWK33	pgrn-1(-); granulin 1(+)
AWK43	pgrn-1(-); granulin 2(+)
AWK107	pgrn-1(-); granulin 3(+)
The sheets in this Excel file contain data analysis for the RNA-seq experiment involving N2, pgrn-1(-), pgrn-1(-); granulin 1(+), pgrn-1(-); granulin 2(+) and pgrn-1(-); granulin 3(+) strains. Differentially expressed genes were identified by using the edgeR package and GO term enrichment analysis was created using DAVID.

## Sheet: CF3050_vs_WT
Category	Term	Count	%	PValue	Genes	List Total	Pop Hits	Pop Total	Fold Enrichment	Bonferroni	Benjamini	FDR
INTERPRO	IPR008160:Collagen triple helix repeat	12	6.52174	5.84355e-08	COL-158, COL-176, COL-144, COL-10, COL-128, SQT-3, DPY-2, COL-41, DPY-3, DPY-4, COL-43, COL-46	97	182	13633	9.2668	8.70685e-06	8.70685e-06	6.97009e-05
INTERPRO	IPR002486:Nematode cuticle collagen, N-terminal	10	5.43478	9.00394e-07	COL-158, COL-176, COL-144, COL-10, SQT-3, DPY-2, COL-41, DPY-3, DPY-4, COL-43	97	147	13633	9.56098	0.00013415	6.70771e-05	0.00107397
GOTERM_MF_2	GO:0042302~structural constituent of cuticle	10	5.43478	5.58143e-06	COL-158, COL-176, COL-144, COL-10, SQT-3, DPY-2, COL-41, DPY-3, DPY-4, COL-43	76	155	8884	7.5416	0.000117203	0.000117203	0.00430954
GOTERM_MF_FAT	GO:0042302~structural constituent of cuticle	10	5.43478	9.4889e-06	COL-158, COL-176, COL-144, COL-10, SQT-3, DPY-2, COL-41, DPY-3, DPY-4, COL-43	62	155	6686	6.95734	0.00085364	0.00085364	0.0103222
GOTERM_MF_1	GO:0005198~structural molecule activity	15	8.15217	2.49638e-05	COL-10, Y54E2A.9, SSP-16, DPY-2, DPY-3, DCT-9, DPY-4, COL-176, COL-158, COL-144, GRL-4, SQT-3, COL-41, COL-43, MEC-7	80	468	9555	3.82812	0.000199693	0.000199693	0.0136658
GOTERM_MF_FAT	GO:0005198~structural molecule activity	15	8.15217	5.90671e-05	COL-10, Y54E2A.9, SSP-16, DPY-2, DPY-3, DCT-9, DPY-4, COL-176, COL-158, COL-144, GRL-4, SQT-3, COL-41, COL-43, MEC-7	62	468	6686	3.45637	0.00530209	0.00265457	0.0642389
GOTERM_BP_FAT	GO:0040014~regulation of multicellular organism growth	12	6.52174	0.000224075	WRT-10, PTR-4, GRD-13, SQT-3, DAF-12, WRT-2, QUA-1, DPY-2, UNC-10, MEC-7, DPY-6, LIN-31	60	415	7838	3.77735	0.0775076	0.0775076	0.307308
GOTERM_BP_3	GO:0040014~regulation of multicellular organism growth	12	6.52174	0.000242286	WRT-10, PTR-4, GRD-13, SQT-3, DAF-12, WRT-2, QUA-1, DPY-2, UNC-10, MEC-7, DPY-6, LIN-31	61	415	7908	3.74861	0.0452275	0.0452275	0.300972
GOTERM_BP_4	GO:0040014~regulation of multicellular organism growth	12	6.52174	0.00026623	WRT-10, PTR-4, GRD-13, SQT-3, DAF-12, WRT-2, QUA-1, DPY-2, UNC-10, MEC-7, DPY-6, LIN-31	60	415	7683	3.70265	0.0601546	0.0601546	0.341485
SP_PIR_KEYWORDS	collagen	7	3.80435	0.000275832	COL-144, COL-10, SQT-3, DPY-2, COL-43, COL-17, COL-46	182	97	19674	7.80095	0.0136988	0.0136988	0.265349
INTERPRO	IPR013087:Zinc finger, C2H2-type/integrase, DNA-binding	5	2.71739	0.000326573	ZAG-1, PAG-3, Y55F3AM.14, ZTF-14, SEM-4	97	47	13633	14.9517	0.0475021	0.0160916	0.388837
GOTERM_BP_1	GO:0040011~locomotion	22	11.9565	0.000427984	PTR-4, GRD-13, FBN-1, GEI-13, ZAG-1, DPY-3, MLT-9, DPY-4, MLT-11, ASD-2, WRT-10, R02D5.3, F52C6.12, EGL-13, LPR-4, SQT-3, LPR-3, QUA-1, WRT-2, COL-43, UNC-10, MEC-7	66	1298	8513	2.18618	0.00682581	0.00682581	0.30353
INTERPRO	IPR002602:Protein of unknown function DB	4	2.17391	0.00054103	F13H8.5, Y65B4BL.1, PQN-32, Y53F4B.25	97	23	13633	24.4429	0.0774699	0.019957	0.643427
INTERPRO	IPR007087:Zinc finger, C2H2-type	8	4.34783	0.000586494	ZAG-1, SOMI-1, PAG-3, K09H9.7, Y55F3AM.14, ZTF-14, ZTF-16, SEM-4	97	204	13633	5.51162	0.0837017	0.0173307	0.697324
GOTERM_BP_2	GO:0051239~regulation of multicellular organismal process	14	7.6087	0.000714226	PTR-4, GRD-13, ZAG-1, DPY-2, DPY-6, WRT-10, SQT-3, DAF-12, WRT-2, QUA-1, PAG-3, MEC-7, UNC-10, LIN-31	62	635	8116	2.88606	0.0595957	0.0595957	0.767486
GOTERM_BP_3	GO:0051239~regulation of multicellular organismal process	14	7.6087	0.000771681	PTR-4, GRD-13, ZAG-1, DPY-2, DPY-6, WRT-10, SQT-3, DAF-12, WRT-2, QUA-1, PAG-3, MEC-7, UNC-10, LIN-31	61	635	7908	2.85819	0.137093	0.0710719	0.9557
INTERPRO	IPR015880:Zinc finger, C2H2-like	8	4.34783	0.000891345	ZAG-1, SOMI-1, PAG-3, K09H9.7, Y55F3AM.14, ZTF-14, ZTF-16, SEM-4	97	219	13633	5.13411	0.124421	0.0219015	1.05802
PIR_SUPERFAMILY	PIRSF038285:cuticle collagen	5	2.71739	0.000939981	COL-144, COL-10, SQT-3, DPY-4, COL-46	29	73	4541	10.7251	0.0241545	0.0241545	0.768254
GOTERM_BP_2	GO:0048518~positive regulation of biological process	27	14.6739	0.00227268	PTR-4, GRD-13, XBX-5, F53B1.4, DPY-2, DPY-6, F23H12.5, FLP-2, SKR-15, LPR-3, DAF-12, WRT-2, QUA-1, CKB-3, SEM-4, SKR-7, FBN-1, GEI-13, ZAG-1, MLT-9, ASD-2, WRT-10, GRL-4, MEC-7, MAB-5, UNC-10, LIN-31	62	2054	8116	1.72073	0.177719	0.0932029	2.42364
GOTERM_MF_5	GO:0046914~transition metal ion binding	18	9.78261	0.00238356	CAT-4, GEI-13, ZAG-1, ELT-3, K09H9.7, Y55F3AM.14, C38D9.2, DAF-12, SOMI-1, HCH-1, T02G5.11, PAG-3, UNC-10, ZTF-14, SEM-4, Y52E8A.2, NAS-6, ZTF-16	30	1567	4951	1.89572	0.060161	0.060161	1.93802
GOTERM_BP_3	GO:0048518~positive regulation of biological process	27	14.6739	0.00254017	PTR-4, GRD-13, XBX-5, F53B1.4, DPY-2, DPY-6, F23H12.5, FLP-2, SKR-15, LPR-3, DAF-12, WRT-2, QUA-1, CKB-3, SEM-4, SKR-7, FBN-1, GEI-13, ZAG-1, MLT-9, ASD-2, WRT-10, GRL-4, MEC-7, MAB-5, UNC-10, LIN-31	61	2054	7908	1.70412	0.384788	0.149499	3.11431
GOTERM_BP_2	GO:0009653~anatomical structure morphogenesis	17	9.23913	0.0026091	SKR-7, PTR-4, GEI-13, ZAG-1, DPY-2, DPY-3, LAD-2, DPY-4, DPY-6, ASD-2, BBS-1, EGL-13, SQT-3, COL-43, MAB-5, MEC-7, COL-17	62	1012	8116	2.19897	0.201225	0.0721563	2.77784
GOTERM_BP_FAT	GO:0040018~positive regulation of multicellular organism growth	9	4.8913	0.00264728	WRT-10, PTR-4, GRD-13, WRT-2, QUA-1, UNC-10, MEC-7, DPY-6, LIN-31	60	322	7838	3.65124	0.614913	0.379446	3.57514
GOTERM_BP_FAT	GO:0040008~regulation of growth	26	14.1304	0.00266301	PTR-4, GRD-13, XBX-5, DPY-2, DPY-6, F23H12.5, FLP-2, SKR-15, LPR-3, DAF-12, WRT-2, QUA-1, CKB-3, SEM-4, SKR-7, FBN-1, GEI-13, ZAG-1, MLT-9, ASD-2, WRT-10, GRL-4, SQT-3, MEC-7, UNC-10, LIN-31	60	1967	7838	1.72672	0.617093	0.273842	3.59602
GOTERM_BP_2	GO:0040008~regulation of growth	26	14.1304	0.00276133	PTR-4, GRD-13, XBX-5, DPY-2, DPY-6, F23H12.5, FLP-2, SKR-15, LPR-3, DAF-12, WRT-2, QUA-1, CKB-3, SEM-4, SKR-7, FBN-1, GEI-13, ZAG-1, MLT-9, ASD-2, WRT-10, GRL-4, SQT-3, MEC-7, UNC-10, LIN-31	62	1967	8116	1.73029	0.211642	0.057718	2.93773
GOTERM_BP_3	GO:0040018~positive regulation of multicellular organism growth	9	4.8913	0.00279164	WRT-10, PTR-4, GRD-13, WRT-2, QUA-1, UNC-10, MEC-7, DPY-6, LIN-31	61	322	7908	3.62346	0.413715	0.124961	3.41772
GOTERM_BP_3	GO:0009653~anatomical structure morphogenesis	17	9.23913	0.00283622	SKR-7, PTR-4, GEI-13, ZAG-1, DPY-2, DPY-3, LAD-2, DPY-4, DPY-6, ASD-2, BBS-1, EGL-13, SQT-3, COL-43, MAB-5, MEC-7, COL-17	61	1012	7908	2.17774	0.418699	0.102819	3.47141
GOTERM_BP_4	GO:0040018~positive regulation of multicellular organism growth	9	4.8913	0.00299268	WRT-10, PTR-4, GRD-13, WRT-2, QUA-1, UNC-10, MEC-7, DPY-6, LIN-31	60	322	7683	3.57904	0.50259	0.294727	3.77726
GOTERM_BP_3	GO:0040008~regulation of growth	26	14.1304	0.00307664	PTR-4, GRD-13, XBX-5, DPY-2, DPY-6, F23H12.5, FLP-2, SKR-15, LPR-3, DAF-12, WRT-2, QUA-1, CKB-3, SEM-4, SKR-7, FBN-1, GEI-13, ZAG-1, MLT-9, ASD-2, WRT-10, GRL-4, SQT-3, MEC-7, UNC-10, LIN-31	61	1967	7908	1.71359	0.444865	0.0934333	3.76053
GOTERM_BP_2	GO:0051240~positive regulation of multicellular organismal process	9	4.8913	0.0030785	WRT-10, PTR-4, GRD-13, WRT-2, QUA-1, UNC-10, MEC-7, DPY-6, LIN-31	62	330	8116	3.57009	0.232917	0.0516503	3.2701
GOTERM_BP_FAT	GO:0051240~positive regulation of multicellular organismal process	9	4.8913	0.00308076	WRT-10, PTR-4, GRD-13, WRT-2, QUA-1, UNC-10, MEC-7, DPY-6, LIN-31	60	330	7838	3.56273	0.6707	0.242473	4.14914
SMART	SM00355:ZnF_C2H2	8	4.34783	0.00322219	ZAG-1, SOMI-1, PAG-3, K09H9.7, Y55F3AM.14, ZTF-14, ZTF-16, SEM-4	51	219	5537	3.96598	0.140743	0.140743	3.01893
GOTERM_BP_3	GO:0051240~positive regulation of multicellular organismal process	9	4.8913	0.00324725	WRT-10, PTR-4, GRD-13, WRT-2, QUA-1, UNC-10, MEC-7, DPY-6, LIN-31	61	330	7908	3.53562	0.462719	0.0849236	3.96521
INTERPRO	IPR000884:Thrombospondin, type 1 repeat	4	2.17391	0.00340545	F23H12.5, HCH-1, H42K12.3, Y73E7A.8	97	43	13633	13.0741	0.398469	0.0700375	3.98723
GOTERM_BP_4	GO:0051240~positive regulation of multicellular organismal process	9	4.8913	0.00347942	WRT-10, PTR-4, GRD-13, WRT-2, QUA-1, UNC-10, MEC-7, DPY-6, LIN-31	60	330	7683	3.49227	0.556083	0.237159	4.37901
GOTERM_BP_5	GO:0040018~positive regulation of multicellular organism growth	9	4.8913	0.00375215	WRT-10, PTR-4, GRD-13, WRT-2, QUA-1, UNC-10, MEC-7, DPY-6, LIN-31	55	322	6749	3.42976	0.503023	0.503023	4.54902
GOTERM_BP_FAT	GO:0045927~positive regulation of growth	25	13.587	0.00385213	PTR-4, GRD-13, XBX-5, DPY-2, DPY-6, F23H12.5, FLP-2, SKR-15, LPR-3, DAF-12, WRT-2, QUA-1, CKB-3, SEM-4, SKR-7, FBN-1, GEI-13, ZAG-1, MLT-9, ASD-2, WRT-10, GRL-4, MEC-7, UNC-10, LIN-31	60	1904	7838	1.71525	0.750786	0.242619	5.16271
GOTERM_BP_2	GO:0045927~positive regulation of growth	25	13.587	0.0039694	PTR-4, GRD-13, XBX-5, DPY-2, DPY-6, F23H12.5, FLP-2, SKR-15, LPR-3, DAF-12, WRT-2, QUA-1, CKB-3, SEM-4, SKR-7, FBN-1, GEI-13, ZAG-1, MLT-9, ASD-2, WRT-10, GRL-4, MEC-7, UNC-10, LIN-31	62	1904	8116	1.71879	0.289685	0.0554134	4.19817
GOTERM_BP_3	GO:0045927~positive regulation of growth	25	13.587	0.00440501	PTR-4, GRD-13, XBX-5, DPY-2, DPY-6, F23H12.5, FLP-2, SKR-15, LPR-3, DAF-12, WRT-2, QUA-1, CKB-3, SEM-4, SKR-7, FBN-1, GEI-13, ZAG-1, MLT-9, ASD-2, WRT-10, GRL-4, MEC-7, UNC-10, LIN-31	61	1904	7908	1.7022	0.569675	0.100037	5.34361
GOTERM_MF_3	GO:0005529~sugar binding	5	2.71739	0.00483292	CLEC-173, CLEC-83, CLEC-160, LEC-8, CLEC-86	50	102	7243	7.10098	0.131071	0.131071	4.008
GOTERM_BP_4	GO:0045927~positive regulation of growth	25	13.587	0.00505947	PTR-4, GRD-13, XBX-5, DPY-2, DPY-6, F23H12.5, FLP-2, SKR-15, LPR-3, DAF-12, WRT-2, QUA-1, CKB-3, SEM-4, SKR-7, FBN-1, GEI-13, ZAG-1, MLT-9, ASD-2, WRT-10, GRL-4, MEC-7, UNC-10, LIN-31	60	1904	7683	1.68133	0.693289	0.255812	6.30859
GOTERM_BP_2	GO:0048856~anatomical structure development	21	11.413	0.00508823	SKR-7, PTR-4, GRD-13, GEI-13, ZAG-1, DPY-2, DPY-3, LAD-2, DPY-4, DPY-6, ASD-2, F52C6.12, BBS-1, EGL-13, SQT-3, PAG-3, COL-43, MAB-5, MEC-7, LIN-31, COL-17	62	1497	8116	1.83632	0.355129	0.0607486	5.35224
GOTERM_MF_4	GO:0046872~metal ion binding	20	10.8696	0.00550778	CAT-4, FBN-1, GEI-13, ZAG-1, ELT-3, K09H9.7, Y55F3AM.14, C38D9.2, DAF-12, SOMI-1, HCH-1, T02G5.11, PAG-3, CKB-3, UNC-10, ZTF-14, SEM-4, Y52E8A.2, NAS-6, ZTF-16	37	1910	6132	1.73539	0.138535	0.138535	4.4726
SMART	SM00209:TSP1	4	2.17391	0.00663439	F23H12.5, HCH-1, H42K12.3, Y73E7A.8	51	43	5537	10.0994	0.268644	0.144807	6.12676
GOTERM_BP_FAT	GO:0018996~molting cycle, collagen and cuticulin-based cuticle	7	3.80435	0.0104743	PTR-4, FBN-1, WRT-2, QUA-1, T19A5.3, MLT-9, MLT-11	60	248	7838	3.68723	0.977419	0.468353	13.4644
GOTERM_BP_FAT	GO:0018988~molting cycle, protein-based cuticle	7	3.80435	0.0104743	PTR-4, FBN-1, WRT-2, QUA-1, T19A5.3, MLT-9, MLT-11	60	248	7838	3.68723	0.977419	0.468353	13.4644
GOTERM_BP_2	GO:0042303~molting cycle	7	3.80435	0.010643	PTR-4, FBN-1, WRT-2, QUA-1, T19A5.3, MLT-9, MLT-11	62	249	8116	3.68001	0.601563	0.108657	10.8974
GOTERM_BP_FAT	GO:0042303~molting cycle	7	3.80435	0.0106712	PTR-4, FBN-1, WRT-2, QUA-1, T19A5.3, MLT-9, MLT-11	60	249	7838	3.67242	0.97898	0.424062	13.7005
GOTERM_BP_3	GO:0018988~molting cycle, protein-based cuticle	7	3.80435	0.0108862	PTR-4, FBN-1, WRT-2, QUA-1, T19A5.3, MLT-9, MLT-11	61	248	7908	3.65918	0.876395	0.207289	12.7297
GOTERM_BP_4	GO:0018996~molting cycle, collagen and cuticulin-based cuticle	7	3.80435	0.0114793	PTR-4, FBN-1, WRT-2, QUA-1, T19A5.3, MLT-9, MLT-11	60	248	7683	3.61431	0.932129	0.416103	13.7851
GOTERM_MF_FAT	GO:0005529~sugar binding	5	2.71739	0.0137073	CLEC-173, CLEC-83, CLEC-160, LEC-8, CLEC-86	62	102	6686	5.28621	0.711249	0.339041	13.9421
GOTERM_MF_2	GO:0030246~carbohydrate binding	6	3.26087	0.016671	CLEC-173, CLEC-83, CLEC-160, LEC-8, CLEC-86, C09F9.2	76	177	8884	3.96253	0.297452	0.161819	12.1736
GOTERM_MF_FAT	GO:0030246~carbohydrate binding	6	3.26087	0.0221373	CLEC-173, CLEC-83, CLEC-160, LEC-8, CLEC-86, C09F9.2	62	177	6686	3.65555	0.866646	0.395701	21.6146
UP_SEQ_FEATURE	region of interest:Triple-helical region	3	1.63043	0.0221577	COL-10, SQT-3, DPY-2	24	33	3249	12.3068	0.786917	0.786917	20.6426
UP_SEQ_FEATURE	signal peptide	8	4.34783	0.0225369	COL-10, CLEC-160, CRN-6, FLP-16, SQT-3, HCH-1, DPY-2, NAS-6	24	422	3249	2.56635	0.792544	0.544526	20.9596
SP_PIR_KEYWORDS	Lectin	5	2.71739	0.0249627	CLEC-173, CLEC-83, CLEC-160, LEC-8, CLEC-86	182	120	19674	4.50412	0.717472	0.468467	21.6103
GOTERM_MF_3	GO:0043169~cation binding	21	11.413	0.0252147	CAT-4, FBN-1, GEI-13, ZAG-1, ELT-3, K09H9.7, Y55F3AM.14, C38D9.2, DAF-12, SOMI-1, LYS-7, HCH-1, T02G5.11, PAG-3, CKB-3, UNC-10, ZTF-14, SEM-4, Y52E8A.2, NAS-6, ZTF-16	50	1960	7243	1.55207	0.523174	0.309474	19.3966
GOTERM_BP_2	GO:0050789~regulation of biological process	35	19.0217	0.0259759	PTR-4, DSC-1, GRD-13, XBX-5, F53B1.4, FKH-9, DPY-2, DPY-6, F23H12.5, FLP-2, SKR-15, LPR-3, WRT-2, QUA-1, DAF-12, CKB-3, SEM-4, SKR-7, FBN-1, GEI-13, PTL-1, ZAG-1, ELT-3, MLT-9, ASD-2, WRT-10, GRL-4, F52C6.12, SQT-3, PAG-3, T02G5.11, UNC-10, MAB-5, MEC-7, LIN-31	62	3457	8116	1.32531	0.896009	0.222362	24.7089
GOTERM_BP_FAT	GO:0010171~body morphogenesis	10	5.43478	0.0287616	SKR-7, PTR-4, SQT-3, GEI-13, DPY-2, DPY-3, DPY-4, COL-43, DPY-6, COL-17	60	582	7838	2.24456	0.999973	0.731056	33.022
GOTERM_BP_3	GO:0010171~body morphogenesis	10	5.43478	0.0301666	SKR-7, PTR-4, SQT-3, GEI-13, DPY-2, DPY-3, DPY-4, COL-43, DPY-6, COL-17	61	582	7908	2.22748	0.997122	0.442923	31.6843
GOTERM_BP_1	GO:0032502~developmental process	37	20.1087	0.0311521	PTR-4, GRD-13, DPY-2, DPY-3, DCT-9, DPY-4, MLT-11, DPY-6, COL-158, F23H12.5, FLP-2, LPR-3, QUA-1, LYS-7, SKR-7, FBN-1, T26E3.7, GEI-13, ZAG-1, F08G2.8, ELT-3, T19A5.3, LAD-2, MLT-9, ASD-2, BBS-1, F52C6.12, EGL-13, SQT-3, HCH-1, PAG-3, T02G5.11, COL-43, MAB-5, MEC-7, COL-17, LIN-31	66	3674	8513	1.29898	0.397316	0.223673	20.1277
GOTERM_BP_4	GO:0010171~body morphogenesis	10	5.43478	0.0321615	SKR-7, PTR-4, SQT-3, GEI-13, DPY-2, DPY-3, DPY-4, COL-43, DPY-6, COL-17	60	582	7683	2.20017	0.999508	0.719018	34.2932
GOTERM_BP_FAT	GO:0009791~post-embryonic development	21	11.413	0.0323278	SKR-7, PTR-4, GRD-13, FBN-1, F08G2.8, DPY-2, T19A5.3, MLT-9, DPY-4, MLT-11, FLP-2, F23H12.5, ASD-2, F52C6.12, EGL-13, SQT-3, LPR-3, QUA-1, COL-43, MEC-7, LIN-31	60	1779	7838	1.54205	0.999993	0.731385	36.3218
GOTERM_BP_2	GO:0009791~post-embryonic development	21	11.413	0.0325559	SKR-7, PTR-4, GRD-13, FBN-1, F08G2.8, DPY-2, T19A5.3, MLT-9, DPY-4, MLT-11, FLP-2, F23H12.5, ASD-2, F52C6.12, EGL-13, SQT-3, LPR-3, QUA-1, COL-43, MEC-7, LIN-31	62	1779	8116	1.54523	0.941947	0.247715	30.0159
GOTERM_BP_3	GO:0009791~post-embryonic development	21	11.413	0.0353102	SKR-7, PTR-4, GRD-13, FBN-1, F08G2.8, DPY-2, T19A5.3, MLT-9, DPY-4, MLT-11, FLP-2, F23H12.5, ASD-2, F52C6.12, EGL-13, SQT-3, LPR-3, QUA-1, COL-43, MEC-7, LIN-31	61	1779	7908	1.53031	0.998958	0.464311	36.0572
COG_ONTOLOGY	Transcription / Cell division and chromosome partitioning	2	1.08696	0.0371314	Y55F3AM.14, ZTF-14	4	14	1118	39.9286	0.140456	0.140456	13.4519
SP_PIR_KEYWORDS	cuticle	3	1.63043	0.0410706	COL-10, SQT-3, DPY-2	182	35	19674	9.26562	0.877162	0.5029	33.2303
GOTERM_BP_2	GO:0048519~negative regulation of biological process	7	3.80435	0.04513	SQT-3, PTL-1, DAF-12, ZAG-1, PAG-3, MAB-5, LIN-31	62	347	8116	2.6407	0.981155	0.303052	39.2239
GOTERM_BP_1	GO:0065007~biological regulation	35	19.0217	0.046726	PTR-4, DSC-1, GRD-13, XBX-5, F53B1.4, FKH-9, DPY-2, DPY-6, F23H12.5, FLP-2, SKR-15, LPR-3, WRT-2, QUA-1, DAF-12, CKB-3, SEM-4, SKR-7, FBN-1, GEI-13, PTL-1, ZAG-1, ELT-3, MLT-9, ASD-2, WRT-10, GRL-4, F52C6.12, SQT-3, PAG-3, T02G5.11, UNC-10, MAB-5, MEC-7, LIN-31	66	3514	8513	1.28471	0.534967	0.225251	28.8102
GOTERM_BP_3	GO:0048519~negative regulation of biological process	7	3.80435	0.0468132	SQT-3, PTL-1, DAF-12, ZAG-1, PAG-3, MAB-5, LIN-31	61	347	7908	2.6152	0.999895	0.533788	44.9209
GOTERM_MF_FAT	GO:0008270~zinc ion binding	18	9.78261	0.04741	CAT-4, GEI-13, ZAG-1, ELT-3, K09H9.7, Y55F3AM.14, C38D9.2, DAF-12, SOMI-1, HCH-1, T02G5.11, PAG-3, UNC-10, ZTF-14, SEM-4, Y52E8A.2, NAS-6, ZTF-16	62	1238	6686	1.56793	0.987366	0.582834	41.0445
GOTERM_BP_FAT	GO:0002119~nematode larval development	20	10.8696	0.0541379	SKR-7, PTR-4, GRD-13, FBN-1, F08G2.8, T19A5.3, MLT-9, DPY-4, MLT-11, FLP-2, F23H12.5, ASD-2, F52C6.12, EGL-13, SQT-3, LPR-3, QUA-1, COL-43, MEC-7, LIN-31	60	1760	7838	1.48447	1	0.865165	53.4395
KEGG_PATHWAY	cel04120:Ubiquitin mediated proteolysis	3	1.63043	0.0542771	F52C6.12, SKR-7, SKR-15	8	86	1534	6.68895	0.42768	0.42768	28.4731
GOTERM_BP_FAT	GO:0002164~larval development	20	10.8696	0.0544096	SKR-7, PTR-4, GRD-13, FBN-1, F08G2.8, T19A5.3, MLT-9, DPY-4, MLT-11, FLP-2, F23H12.5, ASD-2, F52C6.12, EGL-13, SQT-3, LPR-3, QUA-1, COL-43, MEC-7, LIN-31	60	1761	7838	1.48363	1	0.839739	53.6228
GOTERM_MF_4	GO:0043565~sequence-specific DNA binding	7	3.80435	0.0549409	DSC-1, DAF-12, ZAG-1, ELT-3, FKH-9, MAB-5, LIN-31	37	473	6132	2.45266	0.782533	0.533667	37.3845
GOTERM_BP_3	GO:0002164~larval development	20	10.8696	0.0587839	SKR-7, PTR-4, GRD-13, FBN-1, F08G2.8, T19A5.3, MLT-9, DPY-4, MLT-11, FLP-2, F23H12.5, ASD-2, F52C6.12, EGL-13, SQT-3, LPR-3, QUA-1, COL-43, MEC-7, LIN-31	61	1761	7908	1.47234	0.999991	0.589384	52.9336
GOTERM_CC_FAT	GO:0005576~extracellular region	6	3.26087	0.0638997	CLEC-160, FLP-16, SQT-3, HCH-1, C06A8.6, NAS-6	56	311	7912	2.72577	0.781015	0.781015	40.7497
GOTERM_BP_4	GO:0002119~nematode larval development	20	10.8696	0.0643926	SKR-7, PTR-4, GRD-13, FBN-1, F08G2.8, T19A5.3, MLT-9, DPY-4, MLT-11, FLP-2, F23H12.5, ASD-2, F52C6.12, EGL-13, SQT-3, LPR-3, QUA-1, COL-43, MEC-7, LIN-31	60	1760	7683	1.45511	1	0.890898	57.4752
GOTERM_BP_4	GO:0002164~larval development	20	10.8696	0.064707	SKR-7, PTR-4, GRD-13, FBN-1, F08G2.8, T19A5.3, MLT-9, DPY-4, MLT-11, FLP-2, F23H12.5, ASD-2, F52C6.12, EGL-13, SQT-3, LPR-3, QUA-1, COL-43, MEC-7, LIN-31	60	1761	7683	1.45429	1	0.857488	57.6584
GOTERM_BP_3	GO:0045595~regulation of cell differentiation	3	1.63043	0.0650686	ZAG-1, PAG-3, MAB-5	61	55	7908	7.07124	0.999997	0.600652	56.6971
GOTERM_BP_4	GO:0045595~regulation of cell differentiation	3	1.63043	0.0664428	ZAG-1, PAG-3, MAB-5	60	55	7683	6.98455	1	0.831352	58.657
GOTERM_BP_1	GO:0032501~multicellular organismal process	38	20.6522	0.0744168	PTR-4, DSC-1, GRD-13, Y54E2A.9, DPY-2, DCT-9, DPY-4, MLT-11, COL-158, F23H12.5, FLP-2, LPR-3, WRT-2, QUA-1, LYS-7, SEM-4, SKR-7, FBN-1, T26E3.7, GEI-13, ZAG-1, F08G2.8, ELT-3, T19A5.3, LAD-2, MLT-9, ASD-2, F52C6.12, EGL-13, SQT-3, HCH-1, PAG-3, T02G5.11, COL-43, UNC-10, MAB-5, MEC-7, LIN-31	66	4022	8513	1.21865	0.709834	0.266058	42.2563
INTERPRO	IPR009673:Protein of unknown function DUF1261	2	1.08696	0.0748152	Y34B4A.5, F49C12.14	97	11	13633	25.5539	0.999991	0.765034	60.447
GOTERM_BP_2	GO:0048523~negative regulation of cellular process	4	2.17391	0.0766377	PTL-1, ZAG-1, PAG-3, MAB-5	62	132	8116	3.96676	0.998948	0.435279	57.675
GOTERM_CC_1	GO:0005576~extracellular region	6	3.26087	0.0780544	CLEC-160, FLP-16, SQT-3, HCH-1, C06A8.6, NAS-6	72	311	9662	2.58896	0.433843	0.433843	34.2276
GOTERM_BP_3	GO:0048523~negative regulation of cellular process	4	2.17391	0.0783137	PTL-1, ZAG-1, PAG-3, MAB-5	61	132	7908	3.92846	1	0.645982	63.7394
SP_PIR_KEYWORDS	disulfide bond	6	3.26087	0.0791443	COL-10, CLEC-160, SQT-3, HCH-1, DPY-2, NAS-6	182	247	19674	2.62588	0.983798	0.643225	54.8025
GOTERM_BP_4	GO:0048523~negative regulation of cellular process	4	2.17391	0.08051	PTL-1, ZAG-1, PAG-3, MAB-5	60	132	7683	3.8803	1	0.858536	65.9834
GOTERM_BP_5	GO:0002119~nematode larval development	20	10.8696	0.0873338	SKR-7, PTR-4, GRD-13, FBN-1, F08G2.8, T19A5.3, MLT-9, DPY-4, MLT-11, FLP-2, F23H12.5, ASD-2, F52C6.12, EGL-13, SQT-3, LPR-3, QUA-1, COL-43, MEC-7, LIN-31	55	1760	6749	1.39442	1	0.999796	67.7546
GOTERM_BP_2	GO:0050793~regulation of developmental process	5	2.71739	0.0917061	DAF-12, ZAG-1, PAG-3, MAB-5, LIN-31	62	228	8116	2.87068	0.999744	0.470761	64.556
GOTERM_BP_1	GO:0016043~cellular component organization	9	4.8913	0.093478	BBS-1, EGL-13, CRN-6, Y54E2A.9, ZAG-1, C56G7.3, LAD-2, MEC-7, HIL-8	66	613	8513	1.89374	0.792005	0.269516	50.1886
GOTERM_BP_3	GO:0050793~regulation of developmental process	5	2.71739	0.0940943	DAF-12, ZAG-1, PAG-3, MAB-5, LIN-31	61	228	7908	2.84297	1	0.692618	70.7492
UP_SEQ_FEATURE	compositionally biased region:Poly-Thr	2	1.08696	0.094855	C30G12.1, HCH-1	24	14	3249	19.3393	0.998968	0.898954	64.2407
GOTERM_BP_FAT	GO:0048858~cell projection morphogenesis	3	1.63043	0.0972402	BBS-1, ZAG-1, LAD-2	60	70	7838	5.59857	1	0.953531	75.4627
SP_PIR_KEYWORDS	signal	8	4.34783	0.097253	COL-10, CLEC-160, CRN-6, FLP-16, SQT-3, HCH-1, DPY-2, NAS-6	182	424	19674	2.0396	0.993998	0.640532	62.6717
GOTERM_MF_4	GO:0003700~transcription factor activity	7	3.80435	0.0983101	DSC-1, DAF-12, ZAG-1, ELT-3, FKH-9, MAB-5, LIN-31	37	550	6132	2.10929	0.938829	0.605983	57.5716
GOTERM_BP_3	GO:0048858~cell projection morphogenesis	3	1.63043	0.098553	BBS-1, ZAG-1, LAD-2	61	70	7908	5.55597	1	0.688298	72.4905

## Sheet: AWK33.g1_vs_WT
Category	Term	Count	%	PValue	Genes	List Total	Pop Hits	Pop Total	Fold Enrichment	Bonferroni	Benjamini	FDR
GOTERM_BP_3	GO:0009612~response to mechanical stimulus	5	3.3557	1.37654e-05	MEC-18, MEC-1, MTD-1, MEC-12, MEC-7	49	25	7908	32.2776	0.00163676	0.00163676	0.0157767
GOTERM_BP_FAT	GO:0009612~response to mechanical stimulus	5	3.3557	1.54855e-05	MEC-18, MEC-1, MTD-1, MEC-12, MEC-7	50	25	7838	31.352	0.00293794	0.00293794	0.0192446
GOTERM_BP_3	GO:0007638~mechanosensory behavior	4	2.68456	0.000298083	MEC-1, MTD-1, MEC-12, MEC-7	49	22	7908	29.3432	0.0348552	0.0175822	0.341128
GOTERM_BP_FAT	GO:0007638~mechanosensory behavior	4	2.68456	0.000325279	MEC-1, MTD-1, MEC-12, MEC-7	50	22	7838	28.5018	0.0599414	0.0304338	0.403527
GOTERM_BP_4	GO:0007638~mechanosensory behavior	4	2.68456	0.000344785	MEC-1, MTD-1, MEC-12, MEC-7	50	22	7683	27.9382	0.0438398	0.0438398	0.400783
GOTERM_BP_2	GO:0009605~response to external stimulus	5	3.3557	0.00106219	MEC-18, MEC-1, MTD-1, MEC-12, MEC-7	49	77	8116	10.7554	0.0647613	0.0647613	1.07033
INTERPRO	IPR003582:Metridin-like ShK toxin	6	4.02685	0.00120161	F01D5.5, C54D10.3, M163.8, T20G5.8, C14C6.5, NAS-6	97	113	13633	7.46264	0.151868	0.151868	1.4033
INTERPRO	IPR003677:Protein of unknown function DUF148	4	2.68456	0.00131834	PQN-60, C28C12.4, M7.9, ZK596.1	97	31	13633	18.135	0.165341	0.0864034	1.53867
GOTERM_BP_FAT	GO:0050954~sensory perception of mechanical stimulus	3	2.01342	0.00134035	MEC-18, MTD-1, MEC-7	50	9	7838	52.2533	0.224958	0.0814381	1.65318
GOTERM_BP_2	GO:0009628~response to abiotic stimulus	5	3.3557	0.00174539	MEC-18, MEC-1, MTD-1, MEC-12, MEC-7	49	88	8116	9.41095	0.104216	0.0535412	1.7533
SMART	SM00254:ShKT	6	4.02685	0.00186502	F01D5.5, C54D10.3, M163.8, T20G5.8, C14C6.5, NAS-6	45	113	5537	6.53333	0.0649949	0.0649949	1.65123
GOTERM_BP_FAT	GO:0009628~response to abiotic stimulus	5	3.3557	0.00213865	MEC-18, MEC-1, MTD-1, MEC-12, MEC-7	50	88	7838	8.90682	0.334208	0.0966946	2.6258
INTERPRO	IPR007026:Domian of unknown function, DUF-CC	3	2.01342	0.00363901	Y110A2AL.3, Y110A2AL.9, C14C6.5	97	13	13633	32.4338	0.393138	0.153364	4.19464
GOTERM_BP_5	GO:0006464~protein modification process	11	7.38255	0.00481931	ZK354.6, C46A5.1, M04F3.3, R10F2.6, F38H4.4, Y54F10BM.3, KIN-26, T05A7.6, UBC-21, ZK354.2, C08F8.6	39	711	6749	2.67731	0.386102	0.386102	5.23035
INTERPRO	IPR002900:Protein of unknown function DUF38, Caenorhabditis species	7	4.69799	0.00532583	Y20C6A.1, FBXA-134, FBXA-158, K10G4.5, FBXA-188, FBXA-189, F47H4.2	97	227	13633	4.33403	0.518856	0.167146	6.08386
GOTERM_CC_1	GO:0005576~extracellular region	7	4.69799	0.00889757	R05A10.4, COL-34, T01D3.3, INS-19, FLP-5, EGL-20, NAS-6	57	311	9662	3.81531	0.0772865	0.0772865	5.01344
GOTERM_BP_5	GO:0050974~detection of mechanical stimulus involved in sensory perception	2	1.34228	0.0112301	MEC-18, MEC-7	39	2	6749	173.051	0.68039	0.434659	11.802
GOTERM_BP_FAT	GO:0050974~detection of mechanical stimulus involved in sensory perception	2	1.34228	0.0124649	MEC-18, MEC-7	50	2	7838	156.76	0.907747	0.379136	14.4351
GOTERM_BP_FAT	GO:0050982~detection of mechanical stimulus	2	1.34228	0.0124649	MEC-18, MEC-7	50	2	7838	156.76	0.907747	0.379136	14.4351
GOTERM_BP_4	GO:0050974~detection of mechanical stimulus involved in sensory perception	2	1.34228	0.0127156	MEC-18, MEC-7	50	2	7683	153.66	0.810549	0.56474	13.8456
GOTERM_BP_4	GO:0050982~detection of mechanical stimulus	2	1.34228	0.0127156	MEC-18, MEC-7	50	2	7683	153.66	0.810549	0.56474	13.8456
GOTERM_CC_FAT	GO:0005576~extracellular region	7	4.69799	0.0142852	R05A10.4, COL-34, T01D3.3, INS-19, FLP-5, EGL-20, NAS-6	52	311	7912	3.42468	0.321915	0.321915	11.2373
GOTERM_BP_3	GO:0019538~protein metabolic process	17	11.4094	0.0158652	ZK354.6, M04F3.3, F38H4.4, SKR-5, R10F2.6, KIN-26, R03G8.4, ZK354.2, C08F8.6, T25D3.3, C46A5.1, AEX-5, Y54F10BM.3, F44F1.3, T05A7.6, UBC-21, NAS-6	49	1536	7908	1.78619	0.850894	0.469728	16.7485
GOTERM_BP_4	GO:0043412~biopolymer modification	11	7.38255	0.0166222	ZK354.6, C46A5.1, M04F3.3, R10F2.6, F38H4.4, Y54F10BM.3, KIN-26, T05A7.6, UBC-21, ZK354.2, C08F8.6	50	740	7683	2.28414	0.886851	0.516329	17.7331
GOTERM_BP_3	GO:0006793~phosphorus metabolic process	10	6.71141	0.017056	ZK354.6, C46A5.1, M04F3.3, R10F2.6, F38H4.4, Y54F10BM.3, KIN-26, T05A7.6, ZK354.2, C08F8.6	49	665	7908	2.42688	0.870901	0.400581	17.8958
INTERPRO	IPR016186:C-type lectin-like	6	4.02685	0.0188738	CLEC-4, CLEC-28, CLEC-27, CLEC-26, CLEC-60, CLEC-86	97	218	13633	3.86825	0.926497	0.406717	20.0658
GOTERM_BP_5	GO:0030421~defecation	3	2.01342	0.0200669	AEX-5, AEX-3, PBO-5	39	39	6749	13.3116	0.870926	0.494626	20.1816
GOTERM_BP_FAT	GO:0006793~phosphorus metabolic process	10	6.71141	0.0204299	ZK354.6, C46A5.1, M04F3.3, R10F2.6, F38H4.4, Y54F10BM.3, KIN-26, T05A7.6, ZK354.2, C08F8.6	50	665	7838	2.35729	0.980196	0.479854	22.628
GOTERM_BP_FAT	GO:0006796~phosphate metabolic process	10	6.71141	0.0204299	ZK354.6, C46A5.1, M04F3.3, R10F2.6, F38H4.4, Y54F10BM.3, KIN-26, T05A7.6, ZK354.2, C08F8.6	50	665	7838	2.35729	0.980196	0.479854	22.628
GOTERM_BP_5	GO:0007588~excretion	3	2.01342	0.0220506	AEX-5, AEX-3, PBO-5	39	41	6749	12.6623	0.894815	0.430507	21.9601
GOTERM_BP_4	GO:0006796~phosphate metabolic process	10	6.71141	0.0229558	ZK354.6, C46A5.1, M04F3.3, R10F2.6, F38H4.4, Y54F10BM.3, KIN-26, T05A7.6, ZK354.2, C08F8.6	50	665	7683	2.31068	0.951152	0.529877	23.6963
GOTERM_BP_3	GO:0009582~detection of abiotic stimulus	2	1.34228	0.0240636	MEC-18, MEC-7	49	4	7908	80.6939	0.944899	0.439943	24.3602
GOTERM_BP_3	GO:0009581~detection of external stimulus	2	1.34228	0.0240636	MEC-18, MEC-7	49	4	7908	80.6939	0.944899	0.439943	24.3602
GOTERM_BP_FAT	GO:0030421~defecation	3	2.01342	0.0244905	AEX-5, AEX-3, PBO-5	50	39	7838	12.0585	0.991005	0.489833	26.5212
GOTERM_BP_FAT	GO:0009582~detection of abiotic stimulus	2	1.34228	0.0247776	MEC-18, MEC-7	50	4	7838	78.38	0.991494	0.448923	26.7894
GOTERM_BP_FAT	GO:0009581~detection of external stimulus	2	1.34228	0.0247776	MEC-18, MEC-7	50	4	7838	78.38	0.991494	0.448923	26.7894
GOTERM_BP_4	GO:0019538~protein metabolic process	17	11.4094	0.025091	ZK354.6, M04F3.3, F38H4.4, SKR-5, R10F2.6, KIN-26, R03G8.4, ZK354.2, C08F8.6, T25D3.3, C46A5.1, AEX-5, Y54F10BM.3, F44F1.3, T05A7.6, UBC-21, NAS-6	50	1536	7683	1.70066	0.963244	0.483505	25.6157
GOTERM_BP_4	GO:0030421~defecation	3	2.01342	0.0254136	AEX-5, AEX-3, PBO-5	50	39	7683	11.82	0.964792	0.427502	25.9018
GOTERM_BP_3	GO:0007588~excretion	3	2.01342	0.0254535	AEX-5, AEX-3, PBO-5	49	41	7908	11.8089	0.953495	0.400323	25.5858
PIR_SUPERFAMILY	PIRSF002681:Phaseolus glycine-rich protein 1.0	2	1.34228	0.0261594	C28C12.4, ZK596.1	25	5	4541	72.656	0.470692	0.470692	19.1554
GOTERM_BP_FAT	GO:0007588~excretion	3	2.01342	0.0268886	AEX-5, AEX-3, PBO-5	50	41	7838	11.4702	0.994365	0.437531	28.7349
INTERPRO	IPR000242:Protein-tyrosine phosphatase, receptor/non-receptor type	4	2.68456	0.0278447	C46A5.1, R10F2.6, F38H4.4, Y54F10BM.3	97	93	13633	6.04501	0.979117	0.475236	28.2465
GOTERM_BP_4	GO:0007588~excretion	3	2.01342	0.0278977	AEX-5, AEX-3, PBO-5	50	41	7683	11.2434	0.974733	0.408719	28.0717
GOTERM_MF_FAT	GO:0005198~structural molecule activity	8	5.36913	0.0281689	COL-176, M03E7.1, ZK1307.4, COL-34, MSP-38, COL-41, MEC-12, MEC-7	44	468	6686	2.59751	0.923586	0.923586	26.717
GOTERM_MF_1	GO:0005198~structural molecule activity	8	5.36913	0.0287425	COL-176, M03E7.1, ZK1307.4, COL-34, MSP-38, COL-41, MEC-12, MEC-7	62	468	9555	2.63441	0.208091	0.208091	14.7565
INTERPRO	IPR001304:C-type lectin	6	4.02685	0.032131	CLEC-4, CLEC-28, CLEC-27, CLEC-26, CLEC-60, CLEC-86	97	251	13633	3.35967	0.988601	0.472271	31.8782
GOTERM_BP_2	GO:0007610~behavior	7	4.69799	0.0323306	SDZ-24, AEX-3, MEC-1, MTD-1, MEC-12, MEC-7, SEM-4	49	409	8116	2.83479	0.873875	0.498504	28.3068
SMART	SM00194:PTPc	4	2.68456	0.0370143	C46A5.1, R10F2.6, F38H4.4, Y54F10BM.3	45	93	5537	5.29223	0.742774	0.492826	28.5667
GOTERM_MF_FAT	GO:0004725~protein tyrosine phosphatase activity	4	2.68456	0.0379986	C46A5.1, R10F2.6, F38H4.4, Y54F10BM.3	44	116	6686	5.23981	0.969393	0.825053	34.3896
GOTERM_BP_5	GO:0016311~dephosphorylation	4	2.68456	0.0389587	C46A5.1, R10F2.6, F38H4.4, Y54F10BM.3	39	134	6749	5.16571	0.98193	0.551885	35.718
GOTERM_BP_FAT	GO:0007610~behavior	7	4.69799	0.0408243	SDZ-24, AEX-3, MEC-1, MTD-1, MEC-12, MEC-7, SEM-4	50	409	7838	2.68293	0.999636	0.547035	40.4312
PIR_SUPERFAMILY	PIRSF015803:Caenorhabditis elegans hypothetical protein F48G7.8	2	1.34228	0.041539	C54D10.3, C14C6.5	25	8	4541	45.41	0.638767	0.398974	28.8471
GOTERM_BP_FAT	GO:0006470~protein amino acid dephosphorylation	4	2.68456	0.0428872	C46A5.1, R10F2.6, F38H4.4, Y54F10BM.3	50	125	7838	5.01632	0.999758	0.530991	42.0041
SMART	SM00034:CLECT	6	4.02685	0.0472966	CLEC-4, CLEC-28, CLEC-27, CLEC-26, CLEC-60, CLEC-86	45	251	5537	2.9413	0.825226	0.440896	35.089
GOTERM_BP_3	GO:0050906~detection of stimulus involved in sensory perception	2	1.34228	0.0475599	MEC-18, MEC-7	49	8	7908	40.3469	0.996968	0.563242	42.7943
GOTERM_BP_FAT	GO:0050906~detection of stimulus involved in sensory perception	2	1.34228	0.0489534	MEC-18, MEC-7	50	8	7838	39.19	0.999928	0.548288	46.4107
GOTERM_BP_FAT	GO:0016311~dephosphorylation	4	2.68456	0.0509156	C46A5.1, R10F2.6, F38H4.4, Y54F10BM.3	50	134	7838	4.6794	0.999951	0.534091	47.7688
GOTERM_BP_5	GO:0044267~cellular protein metabolic process	12	8.05369	0.0519309	ZK354.6, C46A5.1, M04F3.3, R10F2.6, SKR-5, F38H4.4, Y54F10BM.3, KIN-26, T05A7.6, UBC-21, ZK354.2, C08F8.6	39	1167	6749	1.77945	0.99542	0.592488	44.7341
GOTERM_BP_2	GO:0051606~detection of stimulus	2	1.34228	0.0576241	MEC-18, MEC-7	49	10	8116	33.1265	0.976225	0.607327	45.1716
GOTERM_CC_5	GO:0016021~integral to membrane	42	28.1879	0.0593459	NLP-1, MEC-18, Y110A2AL.3, R02F11.2, SRO-1, T05G5.1, SRI-12, PBO-5, SRBC-15, NLP-8, Y38C1AA.7, W10C8.6, COL-176, FLP-2, T05E12.3, R02D5.3, CLEC-28, B0379.7, CLEC-27, W09C3.2, ZK892.3, F35B12.9, CLC-1, ZK596.1, T20G5.8, C27D6.3, C54D2.2, C28C12.4, C33F10.1, Y39B6A.27, COL-34, INS-19, E02H4.7, C17F3.1, F35A5.2, AEX-3, C10C6.7, C18H7.7, W04E12.4, COL-41, M03F8.5, F22E5.8	49	6596	8803	1.14394	0.70583	0.70583	37.2263
GOTERM_BP_FAT	GO:0051606~detection of stimulus	2	1.34228	0.0608202	MEC-18, MEC-7	50	10	7838	31.352	0.999993	0.573262	54.1537
GOTERM_CC_5	GO:0031224~intrinsic to membrane	42	28.1879	0.0618595	NLP-1, MEC-18, Y110A2AL.3, R02F11.2, SRO-1, T05G5.1, SRI-12, PBO-5, SRBC-15, NLP-8, Y38C1AA.7, W10C8.6, COL-176, FLP-2, T05E12.3, R02D5.3, CLEC-28, B0379.7, CLEC-27, W09C3.2, ZK892.3, F35B12.9, CLC-1, ZK596.1, T20G5.8, C27D6.3, C54D2.2, C28C12.4, C33F10.1, Y39B6A.27, COL-34, INS-19, E02H4.7, C17F3.1, F35A5.2, AEX-3, C10C6.7, C18H7.7, W04E12.4, COL-41, M03F8.5, F22E5.8	49	6608	8803	1.14186	0.721158	0.471945	38.4918
GOTERM_BP_5	GO:0006508~proteolysis	7	4.69799	0.0682548	T25D3.3, SKR-5, AEX-5, F44F1.3, R03G8.4, UBC-21, NAS-6	39	520	6749	2.32954	0.999207	0.63942	54.4404
INTERPRO	IPR001810:Cyclin-like F-box	7	4.69799	0.0712051	FBXB-45, Y20C6A.1, FBXA-158, K10G4.5, FBXA-188, FBXA-189, F47H4.2	97	413	13633	2.38214	0.99996	0.717754	58.0314
INTERPRO	IPR009673:Protein of unknown function DUF1261	2	1.34228	0.0748152	Y34B4A.5, F49C12.14	97	11	13633	25.5539	0.999976	0.693858	59.9092
GOTERM_BP_3	GO:0046903~secretion	3	2.01342	0.0757029	AEX-5, AEX-3, PBO-5	49	75	7908	6.45551	0.999915	0.689939	59.4365
GOTERM_BP_FAT	GO:0046903~secretion	3	2.01342	0.0796613	AEX-5, AEX-3, PBO-5	50	75	7838	6.2704	1	0.650589	64.3616
GOTERM_BP_4	GO:0046903~secretion	3	2.01342	0.0824346	AEX-5, AEX-3, PBO-5	50	75	7683	6.1464	0.999986	0.752912	63.2811
GOTERM_MF_3	GO:0030414~peptidase inhibitor activity	3	2.01342	0.0862508	SRP-5, MEC-1, T01D3.3	41	89	7243	5.95478	0.912435	0.912435	52.6349
INTERPRO	IPR008962:PapD-like	3	2.01342	0.0871229	M03E7.1, ZK1307.4, MSP-38	97	70	13633	6.02342	0.999996	0.713154	65.7485
UP_SEQ_FEATURE	domain:MSP	2	1.34228	0.0903348	ZK1307.4, MSP-38	18	18	3249	20.0556	0.989375	0.989375	59.4881
GOTERM_CC_4	GO:0016021~integral to membrane	42	28.1879	0.0959267	NLP-1, MEC-18, Y110A2AL.3, R02F11.2, SRO-1, T05G5.1, SRI-12, PBO-5, SRBC-15, NLP-8, Y38C1AA.7, W10C8.6, COL-176, FLP-2, T05E12.3, R02D5.3, CLEC-28, B0379.7, CLEC-27, W09C3.2, ZK892.3, F35B12.9, CLC-1, ZK596.1, T20G5.8, C27D6.3, C54D2.2, C28C12.4, C33F10.1, Y39B6A.27, COL-34, INS-19, E02H4.7, C17F3.1, F35A5.2, AEX-3, C10C6.7, C18H7.7, W04E12.4, COL-41, M03F8.5, F22E5.8	50	6596	8829	1.12437	0.911103	0.911103	55.4681
GOTERM_BP_5	GO:0051258~protein polymerization	2	1.34228	0.0967567	MEC-12, MEC-7	39	18	6749	19.2279	0.999966	0.723284	67.749
GOTERM_MF_4	GO:0016301~kinase activity	7	4.69799	0.0983101	ZK354.6, D1044.1, M04F3.3, KIN-26, T05A7.6, ZK354.2, C08F8.6	37	550	6132	2.10929	0.924763	0.924763	56.8114
GOTERM_MF_FAT	GO:0004721~phosphoprotein phosphatase activity	4	2.68456	0.0991461	C46A5.1, R10F2.6, F38H4.4, Y54F10BM.3	44	173	6686	3.5134	0.999917	0.956386	67.8859
GOTERM_BP_2	GO:0003008~system process	6	4.02685	0.0991547	MEC-18, AEX-5, AEX-3, PBO-5, MTD-1, MEC-7	49	418	8116	2.3775	0.99861	0.731717	65.2617
GOTERM_CC_4	GO:0031224~intrinsic to membrane	42	28.1879	0.0995929	NLP-1, MEC-18, Y110A2AL.3, R02F11.2, SRO-1, T05G5.1, SRI-12, PBO-5, SRBC-15, NLP-8, Y38C1AA.7, W10C8.6, COL-176, FLP-2, T05E12.3, R02D5.3, CLEC-28, B0379.7, CLEC-27, W09C3.2, ZK892.3, F35B12.9, CLC-1, ZK596.1, T20G5.8, C27D6.3, C54D2.2, C28C12.4, C33F10.1, Y39B6A.27, COL-34, INS-19, E02H4.7, C17F3.1, F35A5.2, AEX-3, C10C6.7, C18H7.7, W04E12.4, COL-41, M03F8.5, F22E5.8	50	6608	8829	1.12233	0.919363	0.716034	56.8962

## Sheet: AWK43.g2_vs_WT
Category	Term	Count	%	PValue	Genes	List Total	Pop Hits	Pop Total	Fold Enrichment	Bonferroni	Benjamini	FDR
GOTERM_BP_5	GO:0006464~protein modification process	192	7.84955	1.25775e-53	R06B10.1, K06H7.8, VY10G11R.1, C18H7.4, ZK666.8, F26A1.3, TAG-191, R10D12.10, ZK484.7, H12I13.1, F01D4.3, EAK-6, C03C10.2, W09C3.1, C14A4.13, W06F12.3, C27D8.1, UBC-24, F54H5.2, T22C1.8, F26E4.5, ZK596.2, W03A5.1, ZK809.1, C09B9.4, C07E3.4, ZC581.7, F57B9.8, F42C5.5, F55H12.5, OLD-1, R13H9.6, TPA-1, R13H9.5, M7.7, F26A3.4, ZC581.2, F20H11.4, F52C6.12, F26A1.4, KIN-21, KIN-24, Y80D3A.8, F22B3.8, Y…	589	711	6749	3.09425	5.30773e-51	5.30773e-51	1.76799e-50
GOTERM_BP_4	GO:0006796~phosphate metabolic process	188	7.68602	4.21847e-51	R06B10.1, K06H7.8, VY10G11R.1, C18H7.4, ZK666.8, F26A1.3, TAG-191, R10D12.10, ZK484.7, H12I13.1, F01D4.3, EAK-6, C03C10.2, W09C3.1, C14A4.13, W06F12.3, C27D8.1, F54H5.2, T22C1.8, F26E4.5, ZK596.2, W03A5.1, ZK809.1, C09B9.4, C07E3.4, ZC581.7, F57B9.8, F42C5.5, F55H12.5, OLD-1, R13H9.6, TPA-1, R13H9.5, M7.7, F26A3.4, ZC581.2, F20H11.4, F26A1.4, KIN-21, KIN-24, Y80D3A.8, F22B3.8, Y39B6A.30, C27D6.11…	703	665	7683	3.08967	1.84769e-48	1.84769e-48	5.96161e-48
GOTERM_BP_FAT	GO:0006793~phosphorus metabolic process	188	7.68602	2.85865e-50	R06B10.1, K06H7.8, VY10G11R.1, C18H7.4, ZK666.8, F26A1.3, TAG-191, R10D12.10, ZK484.7, H12I13.1, F01D4.3, EAK-6, C03C10.2, W09C3.1, C14A4.13, W06F12.3, C27D8.1, F54H5.2, T22C1.8, F26E4.5, ZK596.2, W03A5.1, ZK809.1, C09B9.4, C07E3.4, ZC581.7, F57B9.8, F42C5.5, F55H12.5, OLD-1, R13H9.6, TPA-1, R13H9.5, M7.7, F26A3.4, ZC581.2, F20H11.4, F26A1.4, KIN-21, KIN-24, Y80D3A.8, F22B3.8, Y39B6A.30, C27D6.11…	724	665	7838	3.06057	2.24118e-47	2.24118e-47	4.37639e-47
GOTERM_BP_FAT	GO:0006796~phosphate metabolic process	188	7.68602	2.85865e-50	R06B10.1, K06H7.8, VY10G11R.1, C18H7.4, ZK666.8, F26A1.3, TAG-191, R10D12.10, ZK484.7, H12I13.1, F01D4.3, EAK-6, C03C10.2, W09C3.1, C14A4.13, W06F12.3, C27D8.1, F54H5.2, T22C1.8, F26E4.5, ZK596.2, W03A5.1, ZK809.1, C09B9.4, C07E3.4, ZC581.7, F57B9.8, F42C5.5, F55H12.5, OLD-1, R13H9.6, TPA-1, R13H9.5, M7.7, F26A3.4, ZC581.2, F20H11.4, F26A1.4, KIN-21, KIN-24, Y80D3A.8, F22B3.8, Y39B6A.30, C27D6.11…	724	665	7838	3.06057	2.24118e-47	2.24118e-47	4.37639e-47
GOTERM_BP_3	GO:0006793~phosphorus metabolic process	188	7.68602	7.34618e-50	R06B10.1, K06H7.8, VY10G11R.1, C18H7.4, ZK666.8, F26A1.3, TAG-191, R10D12.10, ZK484.7, H12I13.1, F01D4.3, EAK-6, C03C10.2, W09C3.1, C14A4.13, W06F12.3, C27D8.1, F54H5.2, T22C1.8, F26E4.5, ZK596.2, W03A5.1, ZK809.1, C09B9.4, C07E3.4, ZC581.7, F57B9.8, F42C5.5, F55H12.5, OLD-1, R13H9.6, TPA-1, R13H9.5, M7.7, F26A3.4, ZC581.2, F20H11.4, F26A1.4, KIN-21, KIN-24, Y80D3A.8, F22B3.8, Y39B6A.30, C27D6.11…	734	665	7908	3.04584	2.21855e-47	2.21855e-47	9.82667e-47
GOTERM_BP_4	GO:0043412~biopolymer modification	193	7.89043	1.0874e-46	VY10G11R.1, TAG-191, R10D12.10, ZK484.7, H12I13.1, EAK-6, C14A4.13, C27D8.1, F54H5.2, T22C1.8, W03A5.1, C09B9.4, C07E3.4, F57B9.8, F42C5.5, OLD-1, F55H12.5, ZK287.7, M7.7, KIN-21, KIN-24, C27D6.11, T19D12.5, B0207.7, C56C10.6, C33H5.16, R09E10.9, K09F6.3, C46A5.1, TTLL-11, T04F3.3, Y54F10BM.3, F21F3.2, Y69A2AR.19, B0207.1, ODR-1, Y65B4A.9, NEKL-1, R155.3, C33F10.8, F33D11.7, F55F8.7, C50F4.10, SP…	703	740	7683	2.85037	4.76281e-44	2.3814e-44	1.53673e-43
INTERPRO	IPR003125:Protein of unknown function WSN	47	1.9215	1.25081e-35	M70.3, R06B10.1, Y22D7AR.14, H04J21.1, M70.1, C06C6.7, F36D3.5, C06C6.6, NHR-266, Y22D7AR.12, Y39B6A.18, K09D9.11, F56H1.3, C01G10.1, F36G9.13, C01G5.4, D1065.3, W03F11.4, K09F6.3, B0524.4, F58D5.6, C18H2.5, C18H2.4, T08G3.7, C38D9.5, H20J04.1, Y57G7A.6, Y67A10A.3, Y69A2AR.19, C18H2.1, F40E12.2, F26D2.10, C09B9.7, T20B6.2, T16A1.2, Y48G1C.5, Y113G7C.1, R155.4, H06I04.5, F07E5.8, C08G5.1, Y53H1C.3…	1456	56	13633	7.8585	1.04693e-32	1.04693e-32	1.9314e-32
GOTERM_MF_FAT	GO:0004721~phosphoprotein phosphatase activity	83	3.3933	1.10223e-33	R06B10.1, Y71G12B.31, Y71G12B.30, F38H4.4, ZK484.7, W03F11.4, C06A1.3, EAK-6, F23B12.1, T22C1.8, Y116A8C.37, F52H3.6, C50F2.5, ZK809.1, W01B6.6, Y57G11C.6, Y54G2A.24, F36H1.3, T20B6.1, C07E3.4, F42C5.5, Y113G7C.1, F55H12.5, W03D8.2, F26A3.4, F20H11.4, C34D4.2, C17H12.3, C17H12.5, Y80D3A.8, Y39B6A.30, F26B1.5, C27B7.6, M01A12.4, M05B5.1, C15H7.3, T16G12.7, Y22D7AR.12, C48B6.4, Y39B6A.18, Y22D7AR.7…	756	173	6686	4.24303	4.02313e-31	4.02313e-31	1.5169e-30
SMART	SM00453:WSN	47	1.9215	1.20314e-33	M70.3, R06B10.1, Y22D7AR.14, H04J21.1, M70.1, C06C6.7, F36D3.5, C06C6.6, NHR-266, Y22D7AR.12, Y39B6A.18, K09D9.11, F56H1.3, C01G10.1, F36G9.13, C01G5.4, D1065.3, W03F11.4, K09F6.3, B0524.4, F58D5.6, C18H2.5, C18H2.4, T08G3.7, C38D9.5, H20J04.1, Y57G7A.6, Y67A10A.3, Y69A2AR.19, C18H2.1, F40E12.2, F26D2.10, C09B9.7, T20B6.2, T16A1.2, Y48G1C.5, Y113G7C.1, R155.4, H06I04.5, F07E5.8, C08G5.1, Y53H1C.3…	666	56	5537	6.97767	2.05736e-31	2.05736e-31	1.46926e-30
GOTERM_BP_FAT	GO:0006468~protein amino acid phosphorylation	124	5.0695	2.89792e-32	K06H7.8, VY10G11R.1, C18H7.4, ZK666.8, F26A1.3, TAG-191, R10D12.10, H12I13.1, F01D4.3, W09C3.1, C03C10.2, C14A4.13, W06F12.3, C27D8.1, F54H5.2, F26E4.5, ZK596.2, W03A5.1, C09B9.4, ZC581.7, F57B9.8, OLD-1, R13H9.6, R13H9.5, TPA-1, ZC581.2, M7.7, F26A1.4, KIN-21, KIN-24, F22B3.8, C27D6.11, T19D12.5, B0207.7, C56C10.6, ZC373.3, Y47G6A.13, Y69E1A.3, H05L14.1, T09B4.7, F21F3.2, KIN-5, ODR-1, T06C10.3,…	724	437	7838	3.0719	2.27197e-29	1.13598e-29	4.4365e-29
INTERPRO	IPR000242:Protein-tyrosine phosphatase, receptor/non-receptor type	57	2.33034	3.08651e-31	Y71G12B.31, R06B10.1, F38H4.4, ZK484.7, W03F11.4, EAK-6, T22C1.8, Y116A8C.37, C50F2.5, ZK809.1, W01B6.6, Y57G11C.6, F36H1.3, T20B6.1, C07E3.4, F42C5.5, F55H12.5, Y113G7C.1, F20H11.4, C17H12.3, C17H12.5, Y80D3A.8, Y39B6A.30, M01A12.4, C15H7.3, M05B5.1, C48B6.4, Y22D7AR.12, Y22D7AR.7, Y39B6A.18, M04G7.2, C33H5.16, K09F6.3, T28F4.3, C46A5.1, T04F3.3, Y54F10BM.3, F35C11.2, C43E11.5, F40G12.10, Y69A2A…	1456	93	13633	5.73881	2.58341e-28	1.29171e-28	4.76595e-28
GOTERM_BP_5	GO:0044267~cellular protein metabolic process	212	8.66721	2.14989e-30	VY10G11R.1, TAG-191, R10D12.10, ZK484.7, H12I13.1, SKR-10, EAK-6, C14A4.13, C27D8.1, F54H5.2, T22C1.8, SKR-12, SKR-13, FBXB-54, W03A5.1, C09B9.4, C07E3.4, CYN-10, F57B9.8, F42C5.5, OLD-1, F55H12.5, M7.7, KIN-21, KIN-24, C27D6.11, F55D12.6, T19D12.5, B0207.7, C56C10.6, R09E10.9, C33H5.16, K09F6.3, C46A5.1, TTLL-11, T04F3.3, Y54F10BM.3, F21F3.2, Y69A2AR.19, B0207.1, ODR-1, Y65B4A.9, NEKL-1, R155.3,…	589	1167	6749	2.08156	9.07253e-28	4.53626e-28	3.02203e-27
INTERPRO	IPR000535:Major sperm protein	50	2.04415	4.28011e-29	F38H4.6, MSP-31, Y48B6A.5, MSP-33, MSP-36, Y53C10A.15, F13H8.12, MSP-38, MSP-113, Y38F2AR.10, C54E10.1, C15H11.1, F54H5.3, MSP-3, C10H11.7, C35E7.9, SSP-11, SSP-10, MSP-40, F13A7.1, MSP-152, T22B3.3, SSP-19, SSP-16, W03D8.5, Y53F4B.19, M03E7.1, C34D4.3, F21H7.5, MSP-142, F42A9.7, C14A4.8, F57A10.2, MSP-56, MSP-57, ZK1307.4, MSP-59, MSP-53, F36D3.4, MSP-19, MSP-55, DCT-9, F58A6.9, MSP-10, ZK546.3,…	1456	77	13633	6.08008	3.58245e-26	1.19415e-26	6.60901e-26
GOTERM_CC_3	GO:0031224~intrinsic to membrane	818	33.4424	4.84021e-29	Y37H2A.14, C06G4.4, T24C4.4, Y37H2A.10, ANT-1.3, F56A11.6, ZK39.10, F32B4.1, F32B4.2, Y69A2AR.31, GTL-2, DPF-2, T05E12.3, CPI-2, C38D9.5, CLEC-266, R05C11.4, CDH-12, C09B9.7, W01D2.3, C09B9.2, M03E7.3, Y69A2AR.23, K06B4.4, GLT-5, R105.1, NAS-25, K09F6.3, CAH-5, Y69A2AR.14, Y69A2AR.19, T12G3.4, F54E4.2, Y37A1A.2, NAS-14, F20G2.6, Y37D8A.5, HAF-1, T10E9.6, W04E12.5, T10E9.5, T10E9.4, W04E12.4, Y37D…	967	6608	9458	1.21075	3.87217e-27	3.87217e-27	5.14571e-26
SMART	SM00194:PTPc	57	2.33034	5.1792e-29	Y71G12B.31, R06B10.1, F38H4.4, ZK484.7, W03F11.4, EAK-6, T22C1.8, Y116A8C.37, C50F2.5, ZK809.1, W01B6.6, Y57G11C.6, F36H1.3, T20B6.1, C07E3.4, F42C5.5, F55H12.5, Y113G7C.1, F20H11.4, C17H12.3, C17H12.5, Y80D3A.8, Y39B6A.30, M01A12.4, C15H7.3, M05B5.1, C48B6.4, Y22D7AR.12, Y22D7AR.7, Y39B6A.18, M04G7.2, C33H5.16, K09F6.3, T28F4.3, C46A5.1, T04F3.3, Y54F10BM.3, F35C11.2, C43E11.5, F40G12.10, Y69A2A…	666	93	5537	5.09556	8.85643e-27	4.42821e-27	6.32479e-26
GOTERM_BP_FAT	GO:0006470~protein amino acid dephosphorylation	60	2.45298	6.27527e-29	Y71G12B.31, R06B10.1, F38H4.4, ZK484.7, W03F11.4, EAK-6, T22C1.8, Y116A8C.37, C50F2.5, ZK809.1, W01B6.6, Y57G11C.6, F36H1.3, T20B6.1, C07E3.4, F42C5.5, F55H12.5, Y113G7C.1, F26A3.4, F20H11.4, C17H12.3, C17H12.5, Y80D3A.8, Y39B6A.30, M01A12.4, C15H7.3, M05B5.1, C48B6.4, Y22D7AR.12, Y22D7AR.7, Y39B6A.18, M04G7.2, C33H5.16, R09E10.9, CDC-25.4, K09F6.3, T28F4.3, C46A5.1, T04F3.3, F35C11.2, Y54F10BM.3…	724	125	7838	5.19646	4.91981e-26	1.63994e-26	9.60699e-26
GOTERM_BP_5	GO:0016310~phosphorylation	125	5.11038	1.80672e-28	K06H7.8, VY10G11R.1, C18H7.4, ZK666.8, F26A1.3, TAG-191, R10D12.10, H12I13.1, F01D4.3, W09C3.1, C03C10.2, C14A4.13, W06F12.3, C27D8.1, F54H5.2, F26E4.5, ZK596.2, W03A5.1, C09B9.4, ZC581.7, F57B9.8, OLD-1, R13H9.6, R13H9.5, TPA-1, ZC581.2, M7.7, F26A1.4, KIN-21, KIN-24, F22B3.8, C27D6.11, T19D12.5, B0207.7, C56C10.6, ZC373.3, Y47G6A.13, Y69E1A.3, H05L14.1, T09B4.7, F21F3.2, KIN-5, ODR-1, T06C10.3,…	589	514	6749	2.78658	7.62434e-26	2.54145e-26	2.53965e-25
GOTERM_MF_5	GO:0016791~phosphatase activity	87	3.55683	2.03223e-28	R06B10.1, Y71G12B.31, Y71G12B.30, F38H4.4, ZK484.7, W03F11.4, C06A1.3, EAK-6, F23B12.1, T22C1.8, Y116A8C.37, F52H3.6, C50F2.5, ZK809.1, W01B6.6, Y57G11C.6, Y54G2A.24, F36H1.3, T20B6.1, C07E3.4, F42C5.5, Y113G7C.1, F55H12.5, W03D8.2, F26A3.4, F20H11.4, C34D4.2, C17H12.3, C17H12.5, Y80D3A.8, Y105C5B.15, Y39B6A.30, F26B1.5, C27B7.6, M01A12.4, M05B5.1, C15H7.3, T16G12.7, Y22D7AR.12, C48B6.4, Y39B6A.1…	543	225	4951	3.52557	2.27609e-26	2.27609e-26	2.30369e-25
GOTERM_BP_5	GO:0016311~dephosphorylation	60	2.45298	2.16195e-28	Y71G12B.31, R06B10.1, F38H4.4, ZK484.7, W03F11.4, EAK-6, T22C1.8, Y116A8C.37, C50F2.5, ZK809.1, W01B6.6, Y57G11C.6, F36H1.3, T20B6.1, C07E3.4, F42C5.5, F55H12.5, Y113G7C.1, F26A3.4, F20H11.4, C17H12.3, C17H12.5, Y80D3A.8, Y39B6A.30, M01A12.4, C15H7.3, M05B5.1, C48B6.4, Y22D7AR.12, Y22D7AR.7, Y39B6A.18, M04G7.2, C33H5.16, R09E10.9, CDC-25.4, K09F6.3, T28F4.3, C46A5.1, T04F3.3, F35C11.2, Y54F10BM.3…	589	134	6749	5.13063	9.12341e-26	2.28085e-26	3.03898e-25
GOTERM_MF_4	GO:0042578~phosphoric ester hydrolase activity	91	3.72036	2.83271e-28	R06B10.1, Y71G12B.31, Y71G12B.30, F38H4.4, F55C5.2, ZK484.7, W03F11.4, C06A1.3, EAK-6, F23B12.1, T22C1.8, Y116A8C.37, F52H3.6, C50F2.5, ZK809.1, W01B6.6, Y57G11C.6, Y54G2A.24, F36H1.3, T20B6.1, C07E3.4, F42C5.5, Y113G7C.1, F55H12.5, W03D8.2, F26A3.4, F20H11.4, C34D4.2, C17H12.3, C17H12.5, Y80D3A.8, Y105C5B.15, Y39B6A.30, F26B1.5, C27B7.6, M01A12.4, M05B5.1, C15H7.3, T16G12.7, Y22D7AR.12, C48B6.4,…	632	256	6132	3.44895	2.86104e-26	2.86104e-26	3.15002e-25
GOTERM_BP_4	GO:0019538~protein metabolic process	259	10.5887	7.6541e-28	VY10G11R.1, TAG-191, R10D12.10, ZK484.7, H12I13.1, EAK-6, SKR-10, DPF-2, Y19D10B.6, C14A4.13, C27D8.1, F54H5.2, SKR-12, T22C1.8, SKR-13, FBXB-54, W03A5.1, WRT-4, WRT-6, C09B9.4, C07E3.4, CYN-10, R03G8.4, F57B9.8, F42C5.5, F55H12.5, OLD-1, NAS-38, M7.7, T28A11.20, KIN-21, KIN-24, NAS-30, K02F6.1, ZMP-1, C27D6.11, F55D12.6, T19D12.5, Y18H1A.9, B0207.7, GLT-5, C56C10.6, NAS-28, C08F11.7, T19D2.1, NA…	703	1536	7683	1.84282	3.3525e-25	1.1175e-25	1.08169e-24
GOTERM_MF_FAT	GO:0016791~phosphatase activity	87	3.55683	6.3054e-27	R06B10.1, Y71G12B.31, Y71G12B.30, F38H4.4, ZK484.7, W03F11.4, C06A1.3, EAK-6, F23B12.1, T22C1.8, Y116A8C.37, F52H3.6, C50F2.5, ZK809.1, W01B6.6, Y57G11C.6, Y54G2A.24, F36H1.3, T20B6.1, C07E3.4, F42C5.5, Y113G7C.1, F55H12.5, W03D8.2, F26A3.4, F20H11.4, C34D4.2, C17H12.3, C17H12.5, Y80D3A.8, Y105C5B.15, Y39B6A.30, F26B1.5, C27B7.6, M01A12.4, M05B5.1, C15H7.3, T16G12.7, Y22D7AR.12, C48B6.4, Y39B6A.1…	756	225	6686	3.41965	2.30147e-24	1.15074e-24	8.67755e-24
GOTERM_BP_FAT	GO:0016311~dephosphorylation	60	2.45298	6.47978e-27	Y71G12B.31, R06B10.1, F38H4.4, ZK484.7, W03F11.4, EAK-6, T22C1.8, Y116A8C.37, C50F2.5, ZK809.1, W01B6.6, Y57G11C.6, F36H1.3, T20B6.1, C07E3.4, F42C5.5, F55H12.5, Y113G7C.1, F26A3.4, F20H11.4, C17H12.3, C17H12.5, Y80D3A.8, Y39B6A.30, M01A12.4, C15H7.3, M05B5.1, C48B6.4, Y22D7AR.12, Y22D7AR.7, Y39B6A.18, M04G7.2, C33H5.16, R09E10.9, CDC-25.4, K09F6.3, T28F4.3, C46A5.1, T04F3.3, F35C11.2, Y54F10BM.3…	724	134	7838	4.84745	5.08015e-24	1.27004e-24	9.92008e-24
GOTERM_CC_2	GO:0044425~membrane part	824	33.6877	1.2451e-26	Y37H2A.14, C06G4.4, T24C4.4, Y37H2A.10, ANT-1.3, F56A11.6, ZK39.10, F32B4.1, F32B4.2, Y69A2AR.31, GTL-2, DPF-2, T05E12.3, CPI-2, C38D9.5, CLEC-266, R05C11.4, CDH-12, C09B9.7, W01D2.3, C09B9.2, M03E7.3, Y69A2AR.23, K06B4.4, GLT-5, R105.1, NAS-25, K09F6.3, CAH-5, Y69A2AR.14, Y69A2AR.19, T12G3.4, F54E4.2, Y37A1A.2, NAS-14, F20G2.6, Y37D8A.5, HAF-1, T10E9.6, W04E12.5, T10E9.5, T10E9.4, W04E12.4, Y37D…	967	6752	9458	1.19362	4.10882e-25	4.10882e-25	1.08679e-23
GOTERM_CC_3	GO:0044425~membrane part	824	33.6877	1.2451e-26	Y37H2A.14, C06G4.4, T24C4.4, Y37H2A.10, ANT-1.3, F56A11.6, ZK39.10, F32B4.1, F32B4.2, Y69A2AR.31, GTL-2, DPF-2, T05E12.3, CPI-2, C38D9.5, CLEC-266, R05C11.4, CDH-12, C09B9.7, W01D2.3, C09B9.2, M03E7.3, Y69A2AR.23, K06B4.4, GLT-5, R105.1, NAS-25, K09F6.3, CAH-5, Y69A2AR.14, Y69A2AR.19, T12G3.4, F54E4.2, Y37A1A.2, NAS-14, F20G2.6, Y37D8A.5, HAF-1, T10E9.6, W04E12.5, T10E9.5, T10E9.4, W04E12.4, Y37D…	967	6752	9458	1.19362	9.96079e-25	4.98039e-25	1.32368e-23
GOTERM_BP_3	GO:0019538~protein metabolic process	259	10.5887	1.63513e-26	VY10G11R.1, TAG-191, R10D12.10, ZK484.7, H12I13.1, EAK-6, SKR-10, DPF-2, Y19D10B.6, C14A4.13, C27D8.1, F54H5.2, SKR-12, T22C1.8, SKR-13, FBXB-54, W03A5.1, WRT-4, WRT-6, C09B9.4, C07E3.4, CYN-10, R03G8.4, F57B9.8, F42C5.5, F55H12.5, OLD-1, NAS-38, M7.7, T28A11.20, KIN-21, KIN-24, NAS-30, K02F6.1, ZMP-1, C27D6.11, F55D12.6, T19D12.5, Y18H1A.9, B0207.7, GLT-5, C56C10.6, NAS-28, C08F11.7, T19D2.1, NA…	734	1536	7908	1.81668	4.93808e-24	2.46904e-24	2.18724e-23
GOTERM_MF_FAT	GO:0004725~protein tyrosine phosphatase activity	60	2.45298	1.72411e-26	Y71G12B.31, R06B10.1, F38H4.4, ZK484.7, W03F11.4, EAK-6, T22C1.8, Y116A8C.37, C50F2.5, ZK809.1, W01B6.6, Y57G11C.6, F36H1.3, T20B6.1, C07E3.4, F42C5.5, F55H12.5, Y113G7C.1, F26A3.4, F20H11.4, C17H12.3, C17H12.5, Y80D3A.8, Y39B6A.30, M01A12.4, C15H7.3, M05B5.1, C48B6.4, Y22D7AR.12, Y22D7AR.7, Y39B6A.18, M04G7.2, C33H5.16, R09E10.9, CDC-25.4, K09F6.3, T28F4.3, C46A5.1, T04F3.3, F35C11.2, Y54F10BM.3…	756	116	6686	4.57444	6.29298e-24	2.09766e-24	2.37273e-23
INTERPRO	IPR000719:Protein kinase, core	120	4.90597	2.51368e-26	K06H7.8, VY10G11R.1, C18H7.4, ZK666.8, F26A1.3, TAG-191, R10D12.10, H12I13.1, F01D4.3, W09C3.1, C03C10.2, C14A4.13, W06F12.3, C27D8.1, F54H5.2, F26E4.5, ZK596.2, W03A5.1, C09B9.4, ZC581.7, F57B9.8, OLD-1, R13H9.6, R13H9.5, TPA-1, ZC581.2, M7.7, F26A1.4, KIN-21, KIN-24, F22B3.8, C27D6.11, T19D12.5, B0207.7, C56C10.6, ZC373.3, Y47G6A.13, Y69E1A.3, H05L14.1, F21F3.2, KIN-5, ODR-1, T06C10.3, Y65B4A.9…	1456	404	13633	2.78119	2.10395e-23	5.25988e-24	3.88143e-23
GOTERM_BP_4	GO:0044267~cellular protein metabolic process	212	8.66721	2.56324e-26	VY10G11R.1, TAG-191, R10D12.10, ZK484.7, H12I13.1, SKR-10, EAK-6, C14A4.13, C27D8.1, F54H5.2, T22C1.8, SKR-12, SKR-13, FBXB-54, W03A5.1, C09B9.4, C07E3.4, CYN-10, F57B9.8, F42C5.5, OLD-1, F55H12.5, M7.7, KIN-21, KIN-24, C27D6.11, F55D12.6, T19D12.5, B0207.7, C56C10.6, R09E10.9, C33H5.16, K09F6.3, C46A5.1, TTLL-11, T04F3.3, Y54F10BM.3, F21F3.2, Y69A2AR.19, B0207.1, ODR-1, Y65B4A.9, NEKL-1, R155.3,…	703	1167	7683	1.98537	1.1227e-23	2.80674e-24	3.62241e-23
INTERPRO	IPR008962:PapD-like	45	1.83974	6.28023e-26	F38H4.6, MSP-31, Y48B6A.5, MSP-33, Y53C10A.15, MSP-36, MSP-38, MSP-113, C15H11.1, F54H5.3, MSP-3, C10H11.7, C35E7.9, SSP-11, SSP-10, MSP-40, F13A7.1, MSP-152, T22B3.3, SSP-19, SSP-16, W03D8.5, M03E7.1, C34D4.3, F21H7.5, MSP-142, F42A9.7, F57A10.2, MSP-56, MSP-57, ZK1307.4, MSP-59, F36D3.4, MSP-53, MSP-19, MSP-55, DCT-9, F58A6.9, MSP-10, ZK546.3, F36H12.3, MSP-64, MSP-63, MSP-65, SSP-31, Y41C4A.7,…	1456	70	13633	6.01928	5.25655e-23	1.05131e-23	9.69743e-23
GOTERM_BP_FAT	GO:0016310~phosphorylation	125	5.11038	1.247e-25	K06H7.8, VY10G11R.1, C18H7.4, ZK666.8, F26A1.3, TAG-191, R10D12.10, H12I13.1, F01D4.3, W09C3.1, C03C10.2, C14A4.13, W06F12.3, C27D8.1, F54H5.2, F26E4.5, ZK596.2, W03A5.1, C09B9.4, ZC581.7, F57B9.8, OLD-1, R13H9.6, R13H9.5, TPA-1, ZC581.2, M7.7, F26A1.4, KIN-21, KIN-24, F22B3.8, C27D6.11, T19D12.5, B0207.7, C56C10.6, ZC373.3, Y47G6A.13, Y69E1A.3, H05L14.1, T09B4.7, F21F3.2, KIN-5, ODR-1, T06C10.3,…	724	514	7838	2.63277	9.77644e-23	1.95529e-23	1.90906e-22
GOTERM_MF_1	GO:0005198~structural molecule activity	129	5.27392	1.3435e-25	Y48B6A.5, Y53C10A.15, F13H8.12, COL-161, Y38F2AR.10, DPY-4, DPY-5, C54E10.1, COL-158, COL-97, COL-157, C15H11.1, DPY-13, COL-156, COL-95, F54H5.3, COL-154, COL-153, MSP-3, COL-92, IFP-1, MSP-152, COL-10, T22B3.3, COL-13, COL-12, COL-150, Y53F4B.19, COL-145, COL-144, M03E7.1, COL-146, GRL-4, C34D4.3, COL-141, COL-88, COL-89, F21H7.5, MSP-142, COL-14, MEC-7, F55D12.6, MSP-19, F40G9.9, R105.1, COL-1…	1017	468	9555	2.58972	1.20915e-24	1.20915e-24	7.73186e-23
GOTERM_MF_5	GO:0004672~protein kinase activity	124	5.0695	4.62648e-25	K06H7.8, VY10G11R.1, C18H7.4, ZK666.8, F26A1.3, TAG-191, R10D12.10, H12I13.1, F01D4.3, W09C3.1, C03C10.2, C14A4.13, W06F12.3, C27D8.1, F54H5.2, F26E4.5, ZK596.2, W03A5.1, C09B9.4, ZC581.7, F57B9.8, OLD-1, R13H9.6, R13H9.5, TPA-1, ZC581.2, M7.7, F26A1.4, KIN-21, KIN-24, F22B3.8, C27D6.11, T19D12.5, B0207.7, C56C10.6, ZC373.3, Y47G6A.13, Y69E1A.3, H05L14.1, T09B4.7, F21F3.2, KIN-5, ODR-1, T06C10.3,…	543	448	4951	2.52369	5.18166e-23	2.59083e-23	5.24448e-22
GOTERM_MF_FAT	GO:0005198~structural molecule activity	129	5.27392	8.55232e-24	Y48B6A.5, Y53C10A.15, F13H8.12, COL-161, Y38F2AR.10, DPY-4, DPY-5, C54E10.1, COL-158, COL-97, COL-157, C15H11.1, DPY-13, COL-156, COL-95, F54H5.3, COL-154, COL-153, MSP-3, COL-92, IFP-1, MSP-152, COL-10, T22B3.3, COL-13, COL-12, COL-150, Y53F4B.19, COL-145, COL-144, M03E7.1, COL-146, GRL-4, C34D4.3, COL-141, COL-88, COL-89, F21H7.5, MSP-142, COL-14, MEC-7, F55D12.6, MSP-19, F40G9.9, R105.1, COL-1…	756	468	6686	2.43775	3.1216e-21	7.80399e-22	1.17698e-20
GOTERM_CC_2	GO:0016020~membrane	830	33.933	1.29315e-23	Y37H2A.14, C06G4.4, T24C4.4, Y37H2A.10, ANT-1.3, F56A11.6, ZK39.10, F32B4.1, F32B4.2, Y69A2AR.31, GTL-2, DPF-2, T05E12.3, CPI-2, C38D9.5, CLEC-266, R05C11.4, CDH-12, C09B9.7, W01D2.3, C09B9.2, M03E7.3, Y69A2AR.23, K06B4.4, GLT-5, R105.1, NAS-25, K09F6.3, CAH-5, Y69A2AR.14, Y69A2AR.19, T12G3.4, F54E4.2, Y37A1A.2, NAS-14, F20G2.6, Y37D8A.5, HAF-1, T10E9.6, W04E12.5, T10E9.5, T10E9.4, W04E12.4, Y37D…	967	6918	9458	1.17347	4.2674e-22	2.1337e-22	1.12873e-20
GOTERM_CC_3	GO:0016020~membrane	830	33.933	1.29315e-23	Y37H2A.14, C06G4.4, T24C4.4, Y37H2A.10, ANT-1.3, F56A11.6, ZK39.10, F32B4.1, F32B4.2, Y69A2AR.31, GTL-2, DPF-2, T05E12.3, CPI-2, C38D9.5, CLEC-266, R05C11.4, CDH-12, C09B9.7, W01D2.3, C09B9.2, M03E7.3, Y69A2AR.23, K06B4.4, GLT-5, R105.1, NAS-25, K09F6.3, CAH-5, Y69A2AR.14, Y69A2AR.19, T12G3.4, F54E4.2, Y37A1A.2, NAS-14, F20G2.6, Y37D8A.5, HAF-1, T10E9.6, W04E12.5, T10E9.5, T10E9.4, W04E12.4, Y37D…	967	6918	9458	1.17347	1.03452e-21	3.44841e-22	1.37477e-20
GOTERM_MF_FAT	GO:0004674~protein serine/threonine kinase activity	119	4.86509	3.41908e-23	K06H7.8, VY10G11R.1, C18H7.4, ZK666.8, F26A1.3, TAG-191, R10D12.10, F01D4.3, W09C3.1, C03C10.2, C14A4.13, W06F12.3, C27D8.1, F54H5.2, F26E4.5, ZK596.2, W03A5.1, C09B9.4, ZC581.7, F57B9.8, OLD-1, R13H9.6, R13H9.5, TPA-1, ZC581.2, M7.7, F26A1.4, KIN-21, KIN-24, F22B3.8, C27D6.11, T19D12.5, B0207.7, C56C10.6, ZC373.3, Y47G6A.13, Y69E1A.3, H05L14.1, T09B4.7, F21F3.2, KIN-5, ODR-1, T06C10.3, Y65B4A.9,…	756	418	6686	2.51777	1.24796e-20	2.49593e-21	4.70537e-20
GOTERM_MF_FAT	GO:0004672~protein kinase activity	124	5.0695	5.16569e-23	K06H7.8, VY10G11R.1, C18H7.4, ZK666.8, F26A1.3, TAG-191, R10D12.10, H12I13.1, F01D4.3, W09C3.1, C03C10.2, C14A4.13, W06F12.3, C27D8.1, F54H5.2, F26E4.5, ZK596.2, W03A5.1, C09B9.4, ZC581.7, F57B9.8, OLD-1, R13H9.6, R13H9.5, TPA-1, ZC581.2, M7.7, F26A1.4, KIN-21, KIN-24, F22B3.8, C27D6.11, T19D12.5, B0207.7, C56C10.6, ZC373.3, Y47G6A.13, Y69E1A.3, H05L14.1, T09B4.7, F21F3.2, KIN-5, ODR-1, T06C10.3,…	756	448	6686	2.44787	1.88548e-20	3.14246e-21	7.10907e-20
INTERPRO	IPR000387:Dual-specific/protein-tyrosine phosphatase, conserved region	47	1.9215	7.05649e-23	Y71G12B.31, R06B10.1, F38H4.4, C15H7.3, M05B5.1, Y22D7AR.12, Y39B6A.18, M04G7.2, C33H5.16, ZK484.7, W03F11.4, K09F6.3, T28F4.3, EAK-6, C46A5.1, T04F3.3, F35C11.2, Y54F10BM.3, T22C1.8, F40G12.10, Y69A2AR.19, B0207.1, ZK809.1, Y57G11C.6, W01B6.6, ZK354.8, F36H1.3, F54F12.1, Y48G1C.5, C24D10.1, Y113G7C.1, H06I04.5, R155.3, C33F10.8, F26A3.4, F47B3.7, F55F8.7, F20H11.4, C17H12.3, C17H12.5, Y80D3A.8, …	1456	86	13633	5.11717	5.90628e-20	9.8438e-21	1.08961e-19
GOTERM_MF_3	GO:0016788~hydrolase activity, acting on ester bonds	114	4.66067	9.94191e-23	R06B10.1, CRN-6, ZK484.7, H12I13.1, C31H1.5, EAK-6, F23B12.1, Y51A2B.4, T22C1.8, R02D3.8, ZK809.1, Y54G2A.24, SUL-2, C07E3.4, F42C5.5, F55H12.5, F26A3.4, F20H11.4, C34D4.2, PAF-1, Y80D3A.8, ZK262.3, Y105C5B.15, Y39B6A.30, F26B1.5, ACE-3, M01A12.4, T16G12.7, T09B9.3, R09E10.9, F09C8.1, GSP-3, C33H5.16, CDC-25.4, GSP-4, R08A2.2, Y69E1A.4, K09F6.3, F49E11.7, C46A5.1, F29D10.2, T04F3.3, F35C11.2, Y54…	685	467	7243	2.58117	8.25178e-21	8.25178e-21	1.06464e-19
GOTERM_MF_4	GO:0016773~phosphotransferase activity, alcohol group as acceptor	126	5.15127	1.29378e-22	K06H7.8, VY10G11R.1, C18H7.4, ZK666.8, F26A1.3, TAG-191, R10D12.10, H12I13.1, F01D4.3, W09C3.1, C03C10.2, C14A4.13, W06F12.3, C27D8.1, F54H5.2, F26E4.5, ZK596.2, W03A5.1, CKB-3, C09B9.4, ZC581.7, F57B9.8, OLD-1, R13H9.6, R13H9.5, TPA-1, ZC581.2, M7.7, F26A1.4, KIN-21, KIN-24, F22B3.8, C27D6.11, T19D12.5, B0207.7, C56C10.6, ZC373.3, Y47G6A.13, Y69E1A.3, H05L14.1, T09B4.7, F21F3.2, KIN-5, ODR-1, T0…	632	510	6132	2.3971	1.30672e-20	6.53359e-21	1.4387e-19
GOTERM_CC_4	GO:0016021~integral to membrane	817	33.4015	1.93978e-22	Y37H2A.14, C06G4.4, T24C4.4, Y37H2A.10, ANT-1.3, F56A11.6, ZK39.10, F32B4.1, F32B4.2, Y69A2AR.31, GTL-2, DPF-2, T05E12.3, CPI-2, C38D9.5, CLEC-266, R05C11.4, CDH-12, C09B9.7, W01D2.3, C09B9.2, M03E7.3, Y69A2AR.23, K06B4.4, GLT-5, R105.1, NAS-25, K09F6.3, CAH-5, Y69A2AR.14, Y69A2AR.19, T12G3.4, F54E4.2, Y37A1A.2, NAS-14, F20G2.6, Y37D8A.5, HAF-1, T10E9.6, W04E12.5, T10E9.5, T10E9.4, W04E12.4, Y37D…	940	6596	8829	1.16339	1.93978e-20	1.93978e-20	2.15303e-19
GOTERM_CC_4	GO:0031224~intrinsic to membrane	818	33.4424	1.98488e-22	Y37H2A.14, C06G4.4, T24C4.4, Y37H2A.10, ANT-1.3, F56A11.6, ZK39.10, F32B4.1, F32B4.2, Y69A2AR.31, GTL-2, DPF-2, T05E12.3, CPI-2, C38D9.5, CLEC-266, R05C11.4, CDH-12, C09B9.7, W01D2.3, C09B9.2, M03E7.3, Y69A2AR.23, K06B4.4, GLT-5, R105.1, NAS-25, K09F6.3, CAH-5, Y69A2AR.14, Y69A2AR.19, T12G3.4, F54E4.2, Y37A1A.2, NAS-14, F20G2.6, Y37D8A.5, HAF-1, T10E9.6, W04E12.5, T10E9.5, T10E9.4, W04E12.4, Y37D…	940	6608	8829	1.1627	1.98488e-20	9.9244e-21	2.20309e-19
GOTERM_CC_5	GO:0016021~integral to membrane	817	33.4015	1.99668e-22	Y37H2A.14, C06G4.4, T24C4.4, Y37H2A.10, ANT-1.3, F56A11.6, ZK39.10, F32B4.1, F32B4.2, Y69A2AR.31, GTL-2, DPF-2, T05E12.3, CPI-2, C38D9.5, CLEC-266, R05C11.4, CDH-12, C09B9.7, W01D2.3, C09B9.2, M03E7.3, Y69A2AR.23, K06B4.4, GLT-5, R105.1, NAS-25, K09F6.3, CAH-5, Y69A2AR.14, Y69A2AR.19, T12G3.4, F54E4.2, Y37A1A.2, NAS-14, F20G2.6, Y37D8A.5, HAF-1, T10E9.6, W04E12.5, T10E9.5, T10E9.4, W04E12.4, Y37D…	938	6596	8803	1.16244	1.95674e-20	1.95674e-20	2.20775e-19
GOTERM_CC_5	GO:0031224~intrinsic to membrane	818	33.4424	2.03976e-22	Y37H2A.14, C06G4.4, T24C4.4, Y37H2A.10, ANT-1.3, F56A11.6, ZK39.10, F32B4.1, F32B4.2, Y69A2AR.31, GTL-2, DPF-2, T05E12.3, CPI-2, C38D9.5, CLEC-266, R05C11.4, CDH-12, C09B9.7, W01D2.3, C09B9.2, M03E7.3, Y69A2AR.23, K06B4.4, GLT-5, R105.1, NAS-25, K09F6.3, CAH-5, Y69A2AR.14, Y69A2AR.19, T12G3.4, F54E4.2, Y37A1A.2, NAS-14, F20G2.6, Y37D8A.5, HAF-1, T10E9.6, W04E12.5, T10E9.5, T10E9.4, W04E12.4, Y37D…	938	6608	8803	1.16175	1.99896e-20	9.99481e-21	2.25538e-19
GOTERM_MF_4	GO:0016301~kinase activity	128	5.23303	1.53424e-20	K06H7.8, VY10G11R.1, C18H7.4, ZK666.8, F26A1.3, TAG-191, R10D12.10, H12I13.1, F01D4.3, W09C3.1, C03C10.2, C14A4.13, W06F12.3, C27D8.1, F54H5.2, F26E4.5, ZK596.2, W03A5.1, CKB-3, C09B9.4, ZC581.7, F57B9.8, OLD-1, R13H9.6, R13H9.5, TPA-1, ZC581.2, M7.7, D1044.1, F26A1.4, KIN-21, KIN-24, F22B3.8, C27D6.11, T19D12.5, B0207.7, C56C10.6, ZC373.3, Y47G6A.13, Y69E1A.3, H05L14.1, T09B4.7, F21F3.2, KIN-5, …	632	550	6132	2.25804	1.54958e-18	5.16527e-19	1.7061e-17
GOTERM_MF_3	GO:0016772~transferase activity, transferring phosphorus-containing groups	134	5.47833	2.32246e-20	K06H7.8, VY10G11R.1, C18H7.4, ZK666.8, F26A1.3, TAG-191, R10D12.10, H12I13.1, F01D4.3, W09C3.1, C03C10.2, C14A4.13, W06F12.3, C27D8.1, F54H5.2, F26E4.5, ZK596.2, W03A5.1, CKB-3, F43G6.5, K06B9.2, C09B9.4, ZC581.7, F57B9.8, OLD-1, R13H9.6, TPA-1, R13H9.5, ZC581.2, M7.7, D1044.1, F26A1.4, KIN-21, KIN-24, F22B3.8, C27D6.11, T19D12.5, B0207.7, C56C10.6, ZC373.3, Y47G6A.13, Y69E1A.3, H05L14.1, T15H9.6…	685	639	7243	2.21734	1.92765e-18	9.63823e-19	2.48705e-17
GOTERM_MF_2	GO:0042302~structural constituent of cuticle	59	2.4121	2.86155e-20	COL-58, COL-161, DPY-4, DPY-5, COL-158, COL-97, COL-157, COL-156, COL-95, DPY-13, COL-154, COL-153, COL-111, COL-92, COL-7, COL-48, COL-10, COL-13, COL-12, COL-49, BLI-2, COL-150, COL-186, BLI-1, COL-145, COL-144, COL-109, COL-146, COL-141, COL-88, COL-89, COL-101, COL-14, COL-43, COL-45, COL-182, COL-180, COL-176, COL-139, COL-71, COL-175, COL-137, COL-173, COL-138, COL-79, COL-77, COL-133, COL-…	892	155	8884	3.79109	1.23047e-18	1.23047e-18	2.66296e-17
INTERPRO	IPR002486:Nematode cuticle collagen, N-terminal	59	2.4121	4.25524e-20	COL-58, COL-161, DPY-4, DPY-5, COL-158, COL-97, COL-157, COL-156, COL-95, DPY-13, COL-154, COL-153, COL-111, COL-92, COL-7, COL-48, COL-10, COL-13, COL-12, COL-49, BLI-2, COL-150, COL-186, BLI-1, COL-145, COL-144, COL-109, COL-146, COL-141, COL-88, COL-89, COL-101, COL-14, COL-43, COL-45, COL-182, COL-180, COL-176, COL-139, COL-71, COL-175, COL-137, COL-173, COL-138, COL-79, COL-77, COL-133, COL-…	1456	147	13633	3.75807	3.56164e-17	5.08805e-18	6.57061e-17
GOTERM_CC_4	GO:0044425~membrane part	824	33.6877	4.65234e-20	Y37H2A.14, C06G4.4, T24C4.4, Y37H2A.10, ANT-1.3, F56A11.6, ZK39.10, F32B4.1, F32B4.2, Y69A2AR.31, GTL-2, DPF-2, T05E12.3, CPI-2, C38D9.5, CLEC-266, R05C11.4, CDH-12, C09B9.7, W01D2.3, C09B9.2, M03E7.3, Y69A2AR.23, K06B4.4, GLT-5, R105.1, NAS-25, K09F6.3, CAH-5, Y69A2AR.14, Y69A2AR.19, T12G3.4, F54E4.2, Y37A1A.2, NAS-14, F20G2.6, Y37D8A.5, HAF-1, T10E9.6, W04E12.5, T10E9.5, T10E9.4, W04E12.4, Y37D…	940	6752	8829	1.14625	4.65234e-18	1.55078e-18	5.16379e-17
INTERPRO	IPR017441:Protein kinase, ATP binding site	81	3.31153	5.01977e-18	K06H7.8, VY10G11R.1, C35E7.10, D2024.1, Y69F12A.1, C05C12.1, C18H7.4, ZK666.8, C25H3.1, Y73B6A.1, H12I13.1, F01D4.3, C25A8.5, VER-1, C03C10.2, W09C3.1, C14A4.13, W06F12.3, C27D8.1, W02B12.12, B0218.5, TAG-344, F26E4.5, ZK596.2, W03A5.1, Y116A8C.38, FRK-1, F38E1.3, K09B11.5, Y39G8C.2, W01B6.5, ZC581.7, F57B9.8, OLD-1, R13H9.6, TPA-1, ZC581.2, C34F11.5, CMK-1, KIN-21, F59A3.8, Y38H8A.4, F53C3.1, ZK…	1456	272	13633	2.78834	4.20155e-15	5.25194e-16	7.75113e-15
GOTERM_MF_FAT	GO:0042302~structural constituent of cuticle	59	2.4121	6.33916e-18	COL-58, COL-161, DPY-4, DPY-5, COL-158, COL-97, COL-157, COL-156, COL-95, DPY-13, COL-154, COL-153, COL-111, COL-92, COL-7, COL-48, COL-10, COL-13, COL-12, COL-49, BLI-2, COL-150, COL-186, BLI-1, COL-145, COL-144, COL-109, COL-146, COL-141, COL-88, COL-89, COL-101, COL-14, COL-43, COL-45, COL-182, COL-180, COL-176, COL-139, COL-71, COL-175, COL-137, COL-173, COL-138, COL-79, COL-77, COL-133, COL-…	756	155	6686	3.36639	2.31379e-15	3.30542e-16	8.724e-15
INTERPRO	IPR008160:Collagen triple helix repeat	63	2.57563	1.16798e-17	COL-58, COL-161, DPY-4, DPY-5, COL-158, COL-97, COL-157, COL-156, COL-95, DPY-13, COL-154, COL-153, COL-111, COL-92, COL-110, COL-7, COL-48, COL-10, COL-13, COL-12, COL-49, BLI-2, COL-150, COL-186, BLI-1, COL-145, COL-144, COL-109, COL-146, COL-88, COL-141, COL-104, COL-89, COL-101, COL-14, COL-43, COL-45, COL-81, COL-182, COL-180, COL-139, COL-176, COL-71, COL-175, COL-137, COL-138, COL-173, COL…	1456	182	13633	3.24115	9.77597e-15	1.08622e-15	1.8035e-14
INTERPRO	IPR006186:Serine/threonine-specific protein phosphatase and bis(5-nucleosyl)-tetraphosphatase	31	1.26738	1.23846e-17	C27B7.6, Y71G12B.30, F40E3.5, T16G12.7, R08C7.8, ZC477.2, GSP-3, GSP-4, C06A1.3, R08A2.2, F07B7.12, Y69E1A.4, F49E11.7, F23B12.1, R03D7.8, F20D6.6, F52H3.6, Y40H4A.2, C23G10.1, F58G1.3, ZC477.10, Y54G2A.24, F42G8.8, ZK938.1, W03D8.2, C47A4.3, C34D4.2, F25B3.4, T25B9.2, F26B1.5, R13A5.11	1456	49	13633	5.92374	1.03659e-14	1.03659e-15	1.91233e-14
SMART	SM00156:PP2Ac	31	1.26738	2.48228e-16	C27B7.6, Y71G12B.30, F40E3.5, T16G12.7, R08C7.8, ZC477.2, GSP-3, GSP-4, C06A1.3, R08A2.2, F07B7.12, Y69E1A.4, F49E11.7, F23B12.1, R03D7.8, F20D6.6, F52H3.6, Y40H4A.2, C23G10.1, F58G1.3, ZC477.10, Y54G2A.24, F42G8.8, ZK938.1, W03D8.2, C47A4.3, C34D4.2, F25B3.4, T25B9.2, F26B1.5, R13A5.11	666	49	5537	5.25976	3.79696e-14	1.26565e-14	2.66454e-13
INTERPRO	IPR000980:SH2 motif	33	1.34914	1.88083e-14	R11E3.1, C35E7.10, KIN-26, C18H7.4, Y4C6A.1, F01D4.3, C25A8.5, Y69E1A.3, Y52D5A.2, C55C3.4, F26E4.5, Y116A8C.38, KIN-5, B0207.11, T08G11.2, FRK-1, K09B11.5, T06C10.3, W01B6.5, ZC581.7, F57B9.8, T25B9.4, T25B9.5, ZK622.1, C34F11.5, SPE-8, KIN-21, KIN-24, F59A3.8, F22B3.8, Y116A8C.24, T21G5.1, Y43C5B.2	1456	67	13633	4.61179	1.57044e-11	1.42764e-12	2.89768e-11
INTERPRO	IPR000387:Protein-tyrosine phosphatase	29	1.18561	1.052e-13	Y71G12B.31, R06B10.1, M05B5.1, Y22D7AR.12, M04G7.2, C33H5.16, ZK484.7, W03F11.4, C46A5.1, Y54F10BM.3, F35C11.2, Y69A2AR.19, B0207.1, ZK809.1, Y57G11C.6, ZK354.8, Y48G1C.5, C24D10.1, C33F10.8, R155.3, F47B3.7, F55F8.7, F20H11.4, C17H12.3, C17H12.5, K07F5.6, T27A3.5, PPH-2, F36H12.10	1456	55	13633	4.93703	8.80935e-11	7.34113e-12	1.62514e-10
SP_PIR_KEYWORDS	tyrosine-protein kinase	35	1.43091	2.93778e-13	R11E3.1, C35E7.10, KIN-26, C18H7.4, Y4C6A.1, F01D4.3, Y69E1A.3, C25A8.5, VER-1, Y52D5A.2, C55C3.4, F26E4.5, W03A5.1, Y116A8C.38, KIN-5, FRK-1, K09B11.5, F09A5.2, T06C10.3, W01B6.5, ZC581.7, F57B9.8, OLD-1, T25B9.4, T25B9.5, ZK622.1, C34F11.5, SPE-8, KIN-21, KIN-24, F59A3.8, F22B3.8, Y116A8C.24, T21G5.1, Y43C5B.2	2374	73	19674	3.97335	5.69904e-11	5.69904e-11	3.66362e-10
INTERPRO	IPR008266:Tyrosine protein kinase, active site	35	1.43091	3.21798e-13	R11E3.1, C35E7.10, KIN-26, C18H7.4, Y4C6A.1, F01D4.3, C25A8.5, Y69E1A.3, Y52D5A.2, C55C3.4, F20D6.5, F26E4.5, KIN-30, W03A5.1, Y116A8C.38, KIN-5, FRK-1, K09B11.5, F09A5.2, T06C10.3, ZC581.7, F57B9.8, OLD-1, T25B9.4, T25B9.5, ZK622.1, C34F11.5, SPE-8, KIN-21, Y48G1BM.6, KIN-24, F59A3.8, F22B3.8, Y116A8C.24, T21G5.1	1456	81	13633	4.04588	2.69299e-10	2.07153e-11	4.96814e-10
SMART	SM00252:SH2	33	1.34914	3.83858e-13	R11E3.1, C35E7.10, KIN-26, C18H7.4, Y4C6A.1, F01D4.3, C25A8.5, Y69E1A.3, Y52D5A.2, C55C3.4, F26E4.5, Y116A8C.38, KIN-5, B0207.11, T08G11.2, FRK-1, K09B11.5, T06C10.3, W01B6.5, ZC581.7, F57B9.8, T25B9.4, T25B9.5, ZK622.1, C34F11.5, SPE-8, KIN-21, KIN-24, F59A3.8, F22B3.8, Y116A8C.24, T21G5.1, Y43C5B.2	666	67	5537	4.09486	6.56305e-11	1.64077e-11	4.68703e-10
PIR_SUPERFAMILY	PIRSF038285:cuticle collagen	33	1.34914	3.2423e-12	COL-58, DPY-4, DPY-5, COL-180, COL-97, COL-175, DPY-13, COL-79, COL-111, COL-77, COL-92, COL-7, COL-133, COL-73, COL-48, COL-10, COL-13, COL-49, COL-12, BLI-2, COL-150, COL-145, COL-144, COL-60, COL-129, COL-88, COL-104, COL-65, COL-101, COL-61, COL-14, COL-45, COL-125	533	73	4541	3.85137	1.06347e-09	1.06347e-09	4.3916e-09
GOTERM_MF_FAT	GO:0004713~protein tyrosine kinase activity	85	3.47506	4.5638e-12	K06H7.8, C35E7.10, Y69F12A.1, C18H7.4, ZK666.8, TAG-191, T05C12.1, F01D4.3, C25A8.5, VER-1, C14A4.13, W06F12.3, C27D8.1, F54H5.2, W02B12.12, TAG-344, F26E4.5, ZK596.2, W03A5.1, Y116A8C.38, FRK-1, F38E1.3, GSKA-3, K09B11.5, W01B6.2, Y39G8C.2, F35C11.3, W01B6.5, ZC581.7, F57B9.8, OLD-1, M05D6.1, R13H9.5, TPA-1, C34F11.5, GCY-11, CMK-1, Y48G1BM.6, KIN-21, F59A3.8, Y38H8A.4, KIN-24, F53C3.1, Y38H8A.3…	756	351	6686	2.14169	1.66578e-09	2.08223e-10	6.28073e-09
UP_SEQ_FEATURE	domain:MSP	14	0.572363	7.87537e-12	F38H4.6, MSP-56, MSP-57, MSP-31, ZK1307.4, MSP-59, MSP-33, MSP-53, MSP-19, MSP-36, MSP-55, MSP-38, MSP-113, F58A6.9, MSP-10, MSP-64, MSP-63, MSP-3, MSP-65, SSP-31, SSP-11, SSP-10, MSP-40, MSP-152, SSP-19, MSP-45, SSP-16, MSP-81, MSP-49, MSP-79, MSP-78, MSP-77, ZK688.12, MSP-76, MSP-51, MSP-50, MSP-142, ZK1307.3	239	18	3249	10.5732	5.03236e-09	5.03236e-09	1.17315e-08
INTERPRO	IPR001245:Tyrosine protein kinase	40	1.63532	1.7817e-11	R11E3.1, C35E7.10, KIN-26, C18H7.4, Y4C6A.1, F01D4.3, Y69E1A.3, C25A8.5, VER-1, Y52D5A.2, C14A4.13, C55C3.4, F26E4.5, KIN-30, W03A5.1, Y116A8C.38, ODR-1, KIN-5, FRK-1, C39H7.1, K09B11.5, F09A5.2, T06C10.3, W01B6.5, ZC581.7, F57B9.8, OLD-1, T25B9.4, T25B9.5, ZK622.1, C34F11.5, SPE-8, KIN-21, KIN-24, F59A3.8, Y38H8A.3, F22B3.8, Y116A8C.24, T21G5.1, Y43C5B.2	1456	115	13633	3.25681	1.49129e-08	1.06521e-09	2.75117e-08
INTERPRO	IPR004843:Metallophosphoesterase	29	1.18561	1.86336e-11	C27B7.6, Y71G12B.30, T16G12.7, R08C7.8, ZC477.2, GSP-3, GSP-4, C06A1.3, R08A2.2, Y69E1A.4, F49E11.7, F23B12.1, F20D6.6, F52H3.6, Y40H4A.2, C23G10.1, F58G1.3, Y54G2A.24, F42G8.8, ZK938.1, W03D8.2, C47A4.3, K07C11.7, C34D4.2, F25B3.4, T25B9.2, Y105C5B.15, F26B1.5, R13A5.11	1456	65	13633	4.17748	1.55964e-08	1.03976e-09	2.87726e-08
GOTERM_MF_3	GO:0001883~purine nucleoside binding	157	6.41864	2.77896e-11	K06H7.8, VY10G11R.1, F23F1.5, C18H7.4, ZK666.8, F26A1.3, TAG-191, R10D12.10, H12I13.1, F01D4.3, W09C3.1, C03C10.2, C14A4.13, W06F12.3, C27D8.1, ABT-5, F54H5.2, TRXR-2, ABT-1, F26E4.5, FBXB-54, ZK596.2, W03A5.1, CKB-3, C09B9.4, ZC581.7, F57B9.8, OLD-1, R13H9.6, TPA-1, R13H9.5, M7.7, ZC581.2, F26A1.4, KIN-21, KIN-24, F22B3.8, C27D6.11, T19D12.5, B0207.7, C56C10.6, ZC373.3, Y47G6A.13, ACDH-5, Y69E1A…	685	1010	7243	1.64364	2.30653e-09	7.68844e-10	2.97589e-08
PIR_SUPERFAMILY	PIRSF000908:serine/threonine-protein phosphatase, conventional type	19	0.776778	1.32226e-10	C23G10.1, Y71G12B.30, F58G1.3, Y54G2A.24, F40E3.5, T16G12.7, F42G8.8, ZK938.1, GSP-4, C06A1.3, Y69E1A.4, F49E11.7, C34D4.2, F23B12.1, T25B9.2, F52H3.6, F26B1.5, Y40H4A.2, R13A5.11	533	29	4541	5.58187	4.337e-08	2.1685e-08	1.79096e-07
INTERPRO	IPR016130:Protein-tyrosine phosphatase, active site	26	1.06296	1.39811e-10	Y71G12B.31, ZK354.8, F36H1.3, C15H7.3, T20B6.1, F54F12.1, Y22D7AR.12, M04G7.2, Y113G7C.1, C33H5.16, ZK484.7, H06I04.5, R155.3, W03F11.4, K09F6.3, F26A3.4, F47B3.7, T28F4.3, F55F8.7, F20H11.4, C17H12.3, T22C1.8, T27A3.5, F25H5.7, B0207.1, F36H12.10	1456	57	13633	4.27099	1.17022e-07	7.31386e-09	2.15885e-07
GOTERM_MF_1	GO:0003824~catalytic activity	490	20.0327	2.43748e-10	VY10G11R.1, Y108F1.5, TAG-191, H12I13.1, C31H1.5, Y19D10B.6, DPF-2, C14A4.13, Y51A2B.4, CPI-2, C27D8.1, ABT-5, E04F6.4, F54H5.2, T22C1.8, TRXR-2, ABT-1, W03A5.1, K06B9.2, C09B9.4, CYN-10, F42C5.5, F57B9.8, NAS-38, M7.7, PAF-1, KIN-21, KIN-24, NAS-30, Y105C5B.15, C27D6.11, ACE-3, MEC-7, DAF-9, Y18H1A.9, B0207.7, GLT-5, T16G12.7, NAS-28, F40G9.9, ACDH-5, T19D2.1, NAS-25, C33H5.16, GSP-3, R09E10.9, …	1017	3726	9555	1.23556	2.19373e-09	1.09686e-09	1.40277e-07
SMART	SM00219:TyrKc	40	1.63532	4.47875e-10	R11E3.1, C35E7.10, KIN-26, C18H7.4, Y4C6A.1, F01D4.3, Y69E1A.3, C25A8.5, VER-1, Y52D5A.2, C14A4.13, C55C3.4, F26E4.5, KIN-30, W03A5.1, Y116A8C.38, ODR-1, KIN-5, FRK-1, C39H7.1, K09B11.5, F09A5.2, T06C10.3, W01B6.5, ZC581.7, F57B9.8, OLD-1, T25B9.4, T25B9.5, ZK622.1, C34F11.5, SPE-8, KIN-21, KIN-24, F59A3.8, Y38H8A.3, F22B3.8, Y116A8C.24, T21G5.1, Y43C5B.2	666	115	5537	2.89176	7.65866e-08	1.53173e-08	5.46941e-07
GOTERM_MF_2	GO:0016740~transferase activity	190	7.76778	5.0854e-10	K06H7.8, VY10G11R.1, C18H7.4, ZK666.8, F26A1.3, TAG-191, R10D12.10, H12I13.1, F01D4.3, C03C10.2, W09C3.1, C14A4.13, W06F12.3, C27D8.1, F54H5.2, F26E4.5, ZK596.2, W03A5.1, CKB-3, K02E11.6, F43G6.5, K06B9.2, C09B9.4, ZC581.7, F57B9.8, OLD-1, R13H9.6, TPA-1, R13H9.5, M7.7, ZC581.2, D1044.1, UGT-2, F26A1.4, KIN-21, KIN-24, STR-225, F22B3.8, T28F2.1, C27D6.11, UGT-8, GST-41, T19D12.5, B0207.7, C56C10.…	892	1249	8884	1.51508	2.18672e-08	1.09336e-08	4.73246e-07
SP_PIR_KEYWORDS	cytoskeleton	42	1.71709	8.8433e-10	F38H4.6, MSP-31, Y48B6A.5, MSP-33, F13H8.12, Y53C10A.15, MSP-36, MSP-38, Y38F2AR.10, MSP-113, C54E10.1, C15H11.1, F54H5.3, MSP-3, C10H11.7, C35E7.9, MSP-40, F13A7.1, MSP-152, T22B3.3, W03D8.5, Y53F4B.19, M03E7.1, SPE-26, F21H7.5, MSP-142, F42A9.7, C14A4.8, F57A10.2, MSP-56, MSP-57, MSP-59, F36D3.4, MSP-53, MSP-19, MSP-55, DCT-9, F58A6.9, MSP-10, ZK546.3, F36H12.3, MSP-64, MSP-63, MSP-65, F52F12.8…	2374	125	19674	2.78453	1.7156e-07	8.578e-08	1.10289e-06
GOTERM_MF_2	GO:0016787~hydrolase activity	215	8.78986	9.11196e-09	Y108F1.5, ZK484.7, H12I13.1, C31H1.5, EAK-6, DPF-2, Y19D10B.6, CPI-2, C29F5.3, Y51A2B.4, ABT-5, T22C1.8, ABT-1, R02D3.8, WRT-4, WRT-6, SUL-2, C07E3.4, R03G8.4, F42C5.5, F55H12.5, NAS-38, PAF-1, T28A11.20, NAS-30, ZK262.3, Y105C5B.15, K02F6.1, ZMP-1, MEC-7, F26B1.5, ACE-3, Y18H1A.9, GLT-5, T16G12.7, NAS-28, R08C7.8, F40G9.9, C08F11.7, NAS-25, T19D2.1, R09E10.9, C33H5.16, GSP-3, GSP-4, F07B7.12, K0…	892	1508	8884	1.41998	3.91814e-07	1.30605e-07	8.47958e-06
GOTERM_MF_2	GO:0001882~nucleoside binding	157	6.41864	9.43083e-09	K06H7.8, VY10G11R.1, F23F1.5, C18H7.4, ZK666.8, F26A1.3, TAG-191, R10D12.10, H12I13.1, F01D4.3, W09C3.1, C03C10.2, C14A4.13, W06F12.3, C27D8.1, ABT-5, F54H5.2, TRXR-2, ABT-1, F26E4.5, FBXB-54, ZK596.2, W03A5.1, CKB-3, C09B9.4, ZC581.7, F57B9.8, OLD-1, R13H9.6, TPA-1, R13H9.5, M7.7, ZC581.2, F26A1.4, KIN-21, KIN-24, F22B3.8, C27D6.11, T19D12.5, B0207.7, C56C10.6, ZC373.3, Y47G6A.13, ACDH-5, Y69E1A…	892	1017	8884	1.53753	4.05525e-07	1.01381e-07	8.77631e-06
GOTERM_MF_4	GO:0030554~adenyl nucleotide binding	157	6.41864	1.16803e-08	K06H7.8, VY10G11R.1, F23F1.5, C18H7.4, ZK666.8, F26A1.3, TAG-191, R10D12.10, H12I13.1, F01D4.3, W09C3.1, C03C10.2, C14A4.13, W06F12.3, C27D8.1, ABT-5, F54H5.2, TRXR-2, ABT-1, F26E4.5, FBXB-54, ZK596.2, W03A5.1, CKB-3, C09B9.4, ZC581.7, F57B9.8, OLD-1, R13H9.6, TPA-1, R13H9.5, M7.7, ZC581.2, F26A1.4, KIN-21, KIN-24, F22B3.8, C27D6.11, T19D12.5, B0207.7, C56C10.6, ZC373.3, Y47G6A.13, ACDH-5, Y69E1A…	632	1009	6132	1.50971	1.17971e-06	2.94928e-07	1.29887e-05
GOTERM_MF_3	GO:0032553~ribonucleotide binding	160	6.54129	1.19447e-08	K06H7.8, VY10G11R.1, F23F1.5, C18H7.4, ZK666.8, F26A1.3, TAG-191, R10D12.10, H12I13.1, F01D4.3, W09C3.1, C03C10.2, C14A4.13, W06F12.3, C27D8.1, ABT-5, F54H5.2, ABT-1, F26E4.5, FBXB-54, ZK596.2, W03A5.1, CKB-3, C09B9.4, ZC581.7, F57B9.8, OLD-1, R13H9.6, TPA-1, R13H9.5, M7.7, ZC581.2, W04C9.5, F26A1.4, KIN-21, KIN-24, F22B3.8, C27D6.11, MEC-7, T19D12.5, B0207.7, C56C10.6, ZC373.3, Y47G6A.13, Y69E1A…	685	1120	7243	1.51053	9.91413e-07	2.47853e-07	1.27912e-05
INTERPRO	IPR005514:Protein of unknown function DUF316	14	0.572363	1.97849e-08	D1081.3, R01H2.2, T06G6.8, F15H9.1, F35E2.9, Y71F9B.15, C46E10.1, Y47H9B.2, F35E2.5, F25E5.7, Y116A8A.4, TRY-8, TRY-7, Y116A8A.6	1456	21	13633	6.24222	1.65598e-05	9.74115e-07	3.05502e-05
GOTERM_BP_2	GO:0043170~macromolecule metabolic process	290	11.8561	2.62228e-08	VY10G11R.1, TAG-191, R10D12.10, ZK484.7, H12I13.1, EAK-6, SKR-10, DPF-2, NHR-7, Y19D10B.6, C14A4.13, C27D8.1, F54H5.2, SKR-12, T22C1.8, TRXR-2, SKR-13, FBXB-54, W03A5.1, NHR-145, WRT-4, WRT-6, C09B9.4, C07E3.4, CYN-10, R03G8.4, F57B9.8, F42C5.5, F55H12.5, OLD-1, ZK287.7, NAS-38, M7.7, T28A11.20, KIN-21, KIN-24, NAS-30, K02F6.1, ZMP-1, C27D6.11, F55D12.6, DAF-8, T19D12.5, Y18H1A.9, NHR-116, B0207.…	761	2372	8116	1.30389	3.09428e-06	3.09428e-06	3.00103e-05
INTERPRO	IPR017442:Serine/threonine protein kinase-related	60	2.45298	2.68126e-08	K06H7.8, D2024.1, Y69F12A.1, C05C12.1, F26A1.3, C25H3.1, ZK666.8, TAG-191, T05C12.1, C03C10.2, W09C3.1, W06F12.3, C27D8.1, F54H5.2, W02B12.12, TAG-344, B0218.5, ZK596.2, F38E1.3, W03G9.5, GSKA-3, W01B6.2, Y39G8C.2, F35C11.3, M05D6.1, R13H9.6, R13H9.5, TPA-1, M7.7, CMK-1, GCY-11, F53C3.1, Y38H8A.4, GCY-19, C27D6.11, T19D12.5, B0207.7, C56C10.6, ZC373.3, Y47G6A.13, C08F8.6, D2045.5, T15B12.2, F41G3…	1456	265	13633	2.12	2.24419e-05	1.24678e-06	4.14019e-05
GOTERM_MF_3	GO:0017076~purine nucleotide binding	166	6.78659	2.72017e-08	K06H7.8, VY10G11R.1, F23F1.5, C18H7.4, ZK666.8, F26A1.3, TAG-191, R10D12.10, H12I13.1, F01D4.3, W09C3.1, C03C10.2, C14A4.13, W06F12.3, C27D8.1, ABT-5, F54H5.2, TRXR-2, ABT-1, F26E4.5, FBXB-54, ZK596.2, W03A5.1, CKB-3, C09B9.4, ZC581.7, F57B9.8, OLD-1, R13H9.6, TPA-1, R13H9.5, M7.7, ZC581.2, W04C9.5, F26A1.4, KIN-21, KIN-24, F22B3.8, C27D6.11, MEC-7, T19D12.5, B0207.7, C56C10.6, ZC373.3, Y47G6A.13…	685	1187	7243	1.47872	2.25774e-06	4.51548e-07	2.91293e-05
GOTERM_BP_3	GO:0044260~cellular macromolecule metabolic process	243	9.93459	1.27426e-07	VY10G11R.1, TAG-191, R10D12.10, ZK484.7, H12I13.1, EAK-6, SKR-10, NHR-7, C14A4.13, C27D8.1, F54H5.2, SKR-12, T22C1.8, SKR-13, TRXR-2, FBXB-54, W03A5.1, NHR-145, C09B9.4, C07E3.4, CYN-10, F57B9.8, F42C5.5, F55H12.5, OLD-1, ZK287.7, M7.7, KIN-21, KIN-24, C27D6.11, F55D12.6, DAF-8, T19D12.5, NHR-116, B0207.7, C56C10.6, R09E10.9, C33H5.16, K09F6.3, C46A5.1, TTLL-11, T04F3.3, Y54F10BM.3, NHR-95, T15H9…	734	1969	7908	1.32963	3.84819e-05	1.28275e-05	0.000170452
GOTERM_MF_5	GO:0032559~adenyl ribonucleotide binding	151	6.17334	1.39836e-07	K06H7.8, VY10G11R.1, F23F1.5, C18H7.4, ZK666.8, F26A1.3, TAG-191, R10D12.10, H12I13.1, F01D4.3, W09C3.1, C03C10.2, C14A4.13, W06F12.3, C27D8.1, ABT-5, F54H5.2, ABT-1, F26E4.5, FBXB-54, ZK596.2, W03A5.1, CKB-3, C09B9.4, ZC581.7, F57B9.8, OLD-1, R13H9.6, TPA-1, R13H9.5, M7.7, ZC581.2, F26A1.4, KIN-21, KIN-24, F22B3.8, C27D6.11, T19D12.5, B0207.7, C56C10.6, ZC373.3, Y47G6A.13, Y69E1A.3, H05L14.1, T0…	543	944	4951	1.45847	1.56616e-05	5.22055e-06	0.000158515
INTERPRO	IPR012885:F-box associated type 2	43	1.75797	1.61576e-07	FBXB-107, SDZ-10, FBXB-106, K05F6.4, W08F4.10, SDZ-33, FBXB-34, FBXB-17, FBXB-13, Y53F4B.24, FBXB-15, FBXB-98, FBXB-97, F49B2.7, FBXB-59, F21D9.1, FBXB-95, FBXB-93, T26H2.10, FBXB-72, FBXB-54, FBXB-53, C53A3.1, FBXB-103, FBXB-119, FBXB-21, FBXB-22, SDZ-9, Y6G8.9, MATH-48, FBXB-26, T02H6.5, FBXB-85, FBXB-69, FBXB-46, FBXB-45, FBXB-7, FBXB-8, FBXB-60, FBXB-41, T05D4.2, FBXB-111, FBXB-63	1456	171	13633	2.35452	0.00013523	7.1178e-06	0.000249492
GOTERM_CC_4	GO:0005856~cytoskeleton	52	2.12592	4.16376e-07	F38H4.6, MSP-31, Y48B6A.5, MSP-33, MSP-36, Y53C10A.15, MSP-38, MSP-113, Y38F2AR.10, C54E10.1, C15H11.1, SPE-15, F54H5.3, TBA-8, MSP-3, C10H11.7, C35E7.9, TBB-6, MSP-40, F13A7.1, MSP-152, IFP-1, T22B3.3, PTL-1, W03D8.5, Y53F4B.19, Y113G7C.1, M03E7.1, DLC-6, SPE-26, FRM-8, F21H7.5, MSP-142, F42A9.7, MEC-7, BBS-5, F57A10.2, MSP-56, MSP-57, MSP-59, MSP-53, F36D3.4, MSP-19, MSP-55, F58A6.9, MSP-10, ZK…	940	235	8829	2.07835	4.16368e-05	1.04094e-05	0.00046215
GOTERM_CC_5	GO:0005856~cytoskeleton	52	2.12592	4.26522e-07	F38H4.6, MSP-31, Y48B6A.5, MSP-33, MSP-36, Y53C10A.15, MSP-38, MSP-113, Y38F2AR.10, C54E10.1, C15H11.1, SPE-15, F54H5.3, TBA-8, MSP-3, C10H11.7, C35E7.9, TBB-6, MSP-40, F13A7.1, MSP-152, IFP-1, T22B3.3, PTL-1, W03D8.5, Y53F4B.19, Y113G7C.1, M03E7.1, DLC-6, SPE-26, FRM-8, F21H7.5, MSP-142, F42A9.7, MEC-7, BBS-5, F57A10.2, MSP-56, MSP-57, MSP-59, MSP-53, F36D3.4, MSP-19, MSP-55, F58A6.9, MSP-10, ZK…	938	235	8803	2.07665	4.17983e-05	1.3933e-05	0.000471609
INTERPRO	IPR004296:Protein of unknown function DUF236	10	0.408831	8.41395e-07	C47E12.10, C04F12.6, C03C11.1, F27C1.3, MATH-46, ZC376.8, F47B3.4, C36F7.5, K07A1.5, R08A2.1	1456	13	13633	7.20256	0.000704	3.52118e-05	0.00129921
INTERPRO	IPR016186:C-type lectin-like	48	1.96239	1.80485e-06	CLEC-210, C49C3.11, CLEC-66, CLEC-48, CLEC-260, CLEC-82, CLEC-184, CLEC-65, CLEC-123, CLEC-27, CLEC-160, CLEC-26, CLEC-86, CLEC-60, CLEC-24, CLEC-266, CLEC-40, CLEC-242, CLEC-166, CLEC-186, CLEC-245, Y38H6C.8, CLEC-246, CLEC-169, CLEC-265, CLEC-198, CLEC-222, CLEC-119, CLEC-117, CLEC-173, CLEC-94, CLEC-57, CLEC-96, CLEC-4, CLEC-151, CLEC-36, CLEC-35, CLEC-72, CLEC-73, CLEC-154, CLEC-153, CLEC-208…	1456	218	13633	2.06165	0.00150952	7.19336e-05	0.00278687
INTERPRO	IPR009658:Protein of unknown function DUF1248	9	0.367948	2.0284e-06	F22B5.5, C28D4.7, ZK1248.5, C28D4.8, C28D4.5, C28D4.4, F36D3.8, K08A2.2, T09F5.10	1456	11	13633	7.6609	0.00169633	7.71683e-05	0.00313204
GOTERM_MF_FAT	GO:0005524~ATP binding	151	6.17334	2.10711e-06	K06H7.8, VY10G11R.1, F23F1.5, C18H7.4, ZK666.8, F26A1.3, TAG-191, R10D12.10, H12I13.1, F01D4.3, W09C3.1, C03C10.2, C14A4.13, W06F12.3, C27D8.1, ABT-5, F54H5.2, ABT-1, F26E4.5, FBXB-54, ZK596.2, W03A5.1, CKB-3, C09B9.4, ZC581.7, F57B9.8, OLD-1, R13H9.6, TPA-1, R13H9.5, M7.7, ZC581.2, F26A1.4, KIN-21, KIN-24, F22B3.8, C27D6.11, T19D12.5, B0207.7, C56C10.6, ZC373.3, Y47G6A.13, Y69E1A.3, H05L14.1, T0…	756	942	6686	1.41766	0.000768801	8.54515e-05	0.00289979
GOTERM_BP_2	GO:0044238~primary metabolic process	347	14.1864	2.13482e-06	VY10G11R.1, LYS-2, TAG-191, R10D12.10, ZK484.7, H12I13.1, C31H1.5, EAK-6, SKR-10, DPF-2, Y19D10B.6, NHR-7, C14A4.13, Y51A2B.4, C27D8.1, F54H5.2, SKR-12, T22C1.8, TRXR-2, SKR-13, LYS-7, HDL-1, FBXB-54, W03A5.1, NHR-145, WRT-4, WRT-6, C09B9.4, C07E3.4, CYN-10, R03G8.4, F42C5.5, F57B9.8, F55H12.5, OLD-1, ZK287.7, NAS-38, M7.7, PAF-1, UGT-2, T28A11.20, KIN-21, KIN-24, NAS-30, ZK262.3, K02F6.1, C27D6.…	761	3059	8116	1.20978	0.000251877	0.000125946	0.00244314
GOTERM_MF_FAT	GO:0032559~adenyl ribonucleotide binding	151	6.17334	2.39276e-06	K06H7.8, VY10G11R.1, F23F1.5, C18H7.4, ZK666.8, F26A1.3, TAG-191, R10D12.10, H12I13.1, F01D4.3, W09C3.1, C03C10.2, C14A4.13, W06F12.3, C27D8.1, ABT-5, F54H5.2, ABT-1, F26E4.5, FBXB-54, ZK596.2, W03A5.1, CKB-3, C09B9.4, ZC581.7, F57B9.8, OLD-1, R13H9.6, TPA-1, R13H9.5, M7.7, ZC581.2, F26A1.4, KIN-21, KIN-24, F22B3.8, C27D6.11, T19D12.5, B0207.7, C56C10.6, ZC373.3, Y47G6A.13, Y69E1A.3, H05L14.1, T0…	756	944	6686	1.41465	0.000872978	8.73321e-05	0.00329289
GOTERM_MF_4	GO:0032555~purine ribonucleotide binding	160	6.54129	2.7852e-06	K06H7.8, VY10G11R.1, F23F1.5, C18H7.4, ZK666.8, F26A1.3, TAG-191, R10D12.10, H12I13.1, F01D4.3, W09C3.1, C03C10.2, C14A4.13, W06F12.3, C27D8.1, ABT-5, F54H5.2, ABT-1, F26E4.5, FBXB-54, ZK596.2, W03A5.1, CKB-3, C09B9.4, ZC581.7, F57B9.8, OLD-1, R13H9.6, TPA-1, R13H9.5, M7.7, ZC581.2, W04C9.5, F26A1.4, KIN-21, KIN-24, F22B3.8, C27D6.11, MEC-7, T19D12.5, B0207.7, C56C10.6, ZC373.3, Y47G6A.13, Y69E1A…	632	1120	6132	1.38608	0.000281266	5.62595e-05	0.00309714
PIR_SUPERFAMILY	PIRSF000675:tyrosine-protein kinase	11	0.449714	4.05837e-06	R11E3.1, C35E7.10, C55C3.4, ZK622.1, SPE-8, F59A3.8, ZC581.7, F26E4.5, F22B3.8, KIN-5, C25A8.5	533	17	4541	5.51275	0.00133026	0.000443618	0.00549681
INTERPRO	IPR001810:Cyclin-like F-box	75	3.06623	4.80579e-06	R03H10.1, SDZ-33, FBXB-17, FBXB-13, F34D6.1, FBXB-15, FBXB-98, FBXA-223, FBXB-59, F35E2.8, Y20C6A.1, FBXB-95, FBXA-224, FBXB-93, FBXB-56, FBXB-54, Y6E2A.10, T26E3.5, SDZ-9, FBXA-94, FBXB-85, FBXA-163, FBXB-46, FBXB-45, FBXB-7, FBXB-8, FBXB-41, FBXA-120, W04A8.3, K10G4.10, Y40B10A.4, SDZ-10, FBXB-106, W08F4.12, K05F6.4, FBXB-34, FBXA-111, T08E11.1, FBXA-113, FBXA-114, FBXA-83, FBXA-115, Y53F4B.24,…	1456	413	13633	1.70036	0.00401438	0.000174874	0.00742046
UP_SEQ_FEATURE	signal peptide	56	2.28945	5.74175e-06	CDH-4, CRN-6, HIM-4, LET-268, B0228.1, CPG-7, INS-7, F02A9.1, CLEC-160, PXN-1, COL-7, INS-5, C03G6.5, INS-6, COL-10, WRT-4, COL-13, WRT-6, COL-12, ABF-1, LRP-1, C08F11.12, FLP-13, MUA-3, BLI-1, NAS-38, COL-145, K07C11.7, SPE-27, NAS-30, TAG-209, ZK262.3, C05G5.5, DAF-7, NAS-28, T09B9.3, NAS-25, GLR-2, PAT-2, FLP-3, FLP-1, B0416.2, UGT-46, CAH-5, FOZI-1, Y73F4A.2, Y45F10C.4, NAS-14, NUC-1, SPE-9, …	239	422	3249	1.80396	0.00366227	0.00183281	0.00855286
SP_PIR_KEYWORDS	collagen	29	1.18561	6.81471e-06	COL-58, DPY-5, COL-139, COL-175, COL-71, DPY-13, COL-173, COL-79, COL-111, COL-110, COL-7, COL-73, COL-48, COL-10, COL-13, COL-49, COL-12, COL-33, BLI-1, COL-145, COL-144, COL-109, COL-104, COL-88, COL-141, COL-101, COL-43, COL-14, COL-45	2374	97	19674	2.47764	0.00132119	0.000440589	0.00849859
GOTERM_CC_FAT	GO:0005856~cytoskeleton	52	2.12592	7.16588e-06	F38H4.6, MSP-31, Y48B6A.5, MSP-33, MSP-36, Y53C10A.15, MSP-38, MSP-113, Y38F2AR.10, C54E10.1, C15H11.1, SPE-15, F54H5.3, TBA-8, MSP-3, C10H11.7, C35E7.9, TBB-6, MSP-40, F13A7.1, MSP-152, IFP-1, T22B3.3, PTL-1, W03D8.5, Y53F4B.19, Y113G7C.1, M03E7.1, DLC-6, SPE-26, FRM-8, F21H7.5, MSP-142, F42A9.7, MEC-7, BBS-5, F57A10.2, MSP-56, MSP-57, MSP-59, MSP-53, F36D3.4, MSP-19, MSP-55, F58A6.9, MSP-10, ZK…	928	235	7912	1.88657	0.000916815	0.000916815	0.00832166
GOTERM_MF_FAT	GO:0030554~adenyl nucleotide binding	157	6.41864	7.62892e-06	K06H7.8, VY10G11R.1, F23F1.5, C18H7.4, ZK666.8, F26A1.3, TAG-191, R10D12.10, H12I13.1, F01D4.3, W09C3.1, C03C10.2, C14A4.13, W06F12.3, C27D8.1, ABT-5, F54H5.2, TRXR-2, ABT-1, F26E4.5, FBXB-54, ZK596.2, W03A5.1, CKB-3, C09B9.4, ZC581.7, F57B9.8, OLD-1, R13H9.6, TPA-1, R13H9.5, M7.7, ZC581.2, F26A1.4, KIN-21, KIN-24, F22B3.8, C27D6.11, T19D12.5, B0207.7, C56C10.6, ZC373.3, Y47G6A.13, ACDH-5, Y69E1A…	756	1009	6686	1.37611	0.00278069	0.00025311	0.0104985
GOTERM_MF_FAT	GO:0001883~purine nucleoside binding	157	6.41864	7.95559e-06	K06H7.8, VY10G11R.1, F23F1.5, C18H7.4, ZK666.8, F26A1.3, TAG-191, R10D12.10, H12I13.1, F01D4.3, W09C3.1, C03C10.2, C14A4.13, W06F12.3, C27D8.1, ABT-5, F54H5.2, TRXR-2, ABT-1, F26E4.5, FBXB-54, ZK596.2, W03A5.1, CKB-3, C09B9.4, ZC581.7, F57B9.8, OLD-1, R13H9.6, TPA-1, R13H9.5, M7.7, ZC581.2, F26A1.4, KIN-21, KIN-24, F22B3.8, C27D6.11, T19D12.5, B0207.7, C56C10.6, ZC373.3, Y47G6A.13, ACDH-5, Y69E1A…	756	1010	6686	1.37475	0.00289959	0.000241954	0.010948
INTERPRO	IPR008574:Protein of unknown function DUF856, Caenorhabditis species	7	0.286182	9.31576e-06	T16A9.5, F58A6.5, Y37D8A.5, W03D8.9, K06A5.2, Y69E1A.1, W03D8.10	1456	7	13633	9.36332	0.007767	0.000324836	0.0143837
INTERPRO	IPR016638:Uncharacterised protein family UPF0376	14	0.572363	1.09111e-05	T20D4.15, F35F10.13, C36C5.12, C04E12.2, C36C5.15, C04E12.4, T28A11.3, T28A11.19, C17B7.4, T20D4.10, T28A11.16, T20D4.11, C17B7.3, T20D4.12, C03G6.5	1456	32	13633	4.09645	0.00909103	0.000365238	0.0168467
GOTERM_MF_FAT	GO:0001882~nucleoside binding	157	6.41864	1.20426e-05	K06H7.8, VY10G11R.1, F23F1.5, C18H7.4, ZK666.8, F26A1.3, TAG-191, R10D12.10, H12I13.1, F01D4.3, W09C3.1, C03C10.2, C14A4.13, W06F12.3, C27D8.1, ABT-5, F54H5.2, TRXR-2, ABT-1, F26E4.5, FBXB-54, ZK596.2, W03A5.1, CKB-3, C09B9.4, ZC581.7, F57B9.8, OLD-1, R13H9.6, TPA-1, R13H9.5, M7.7, ZC581.2, F26A1.4, KIN-21, KIN-24, F22B3.8, C27D6.11, T19D12.5, B0207.7, C56C10.6, ZC373.3, Y47G6A.13, ACDH-5, Y69E1A…	756	1017	6686	1.36528	0.00438593	0.000338064	0.0165719
PIR_SUPERFAMILY	PIRSF016383:DUF856_CAE_spp	7	0.286182	1.58975e-05	T16A9.5, F58A6.5, Y37D8A.5, W03D8.9, K06A5.2, Y69E1A.1, W03D8.10	533	7	4541	8.5197	0.00520086	0.00130276	0.0215307
GOTERM_CC_FAT	GO:0016021~integral to membrane	817	33.4015	1.68495e-05	Y37H2A.14, C06G4.4, T24C4.4, Y37H2A.10, ANT-1.3, F56A11.6, ZK39.10, F32B4.1, F32B4.2, Y69A2AR.31, GTL-2, DPF-2, T05E12.3, CPI-2, C38D9.5, CLEC-266, R05C11.4, CDH-12, C09B9.7, W01D2.3, C09B9.2, M03E7.3, Y69A2AR.23, K06B4.4, GLT-5, R105.1, NAS-25, K09F6.3, CAH-5, Y69A2AR.14, Y69A2AR.19, T12G3.4, F54E4.2, Y37A1A.2, NAS-14, F20G2.6, Y37D8A.5, HAF-1, T10E9.6, W04E12.5, T10E9.5, T10E9.4, W04E12.4, Y37D…	928	6596	7912	1.05604	0.00215444	0.0010778	0.0195662
GOTERM_CC_FAT	GO:0031224~intrinsic to membrane	818	33.4424	1.87177e-05	Y37H2A.14, C06G4.4, T24C4.4, Y37H2A.10, ANT-1.3, F56A11.6, ZK39.10, F32B4.1, F32B4.2, Y69A2AR.31, GTL-2, DPF-2, T05E12.3, CPI-2, C38D9.5, CLEC-266, R05C11.4, CDH-12, C09B9.7, W01D2.3, C09B9.2, M03E7.3, Y69A2AR.23, K06B4.4, GLT-5, R105.1, NAS-25, K09F6.3, CAH-5, Y69A2AR.14, Y69A2AR.19, T12G3.4, F54E4.2, Y37A1A.2, NAS-14, F20G2.6, Y37D8A.5, HAF-1, T10E9.6, W04E12.5, T10E9.5, T10E9.4, W04E12.4, Y37D…	928	6608	7912	1.05541	0.00239303	0.000798312	0.0217354
INTERPRO	IPR001304:C-type lectin	50	2.04415	1.98538e-05	CLEC-210, C49C3.11, CLEC-66, CLEC-260, CLEC-65, CLEC-123, CLEC-160, CLEC-27, CLEC-26, CLEC-60, CLEC-24, CLEC-266, CLEC-166, CLEC-169, CLEC-265, CLEC-198, CLEC-222, CLEC-119, CLEC-117, CLEC-4, CLEC-151, CLEC-36, CLEC-72, CLEC-35, CLEC-73, CLEC-154, CLEC-153, CLEC-79, CLEC-48, CLEC-82, CLEC-184, CLEC-83, CLEC-86, CLEC-40, CLEC-242, CLEC-186, Y38H6C.8, CLEC-245, CLEC-246, CLEC-173, CLEC-57, CLEC-94,…	1456	251	13633	1.8652	0.0164805	0.000638943	0.0306523
SP_PIR_KEYWORDS	serine/threonine-specific phosphatase	12	0.490597	2.58631e-05	F49E11.7, F58G1.3, C34D4.2, F25B3.4, T16G12.7, F42G8.8, ZK938.1, F52H3.6, GSP-4, W03D8.2, Y69E1A.4, Y40H4A.2	2374	23	19674	4.3238	0.00500494	0.00125359	0.0322502
PIR_SUPERFAMILY	PIRSF015697:UCP015697	14	0.572363	2.84093e-05	T20D4.15, F35F10.13, C36C5.12, C04E12.2, C36C5.15, C04E12.4, T28A11.3, T28A11.19, C17B7.4, T20D4.10, T28A11.16, T20D4.11, C17B7.3, T20D4.12, C03G6.5	533	32	4541	3.72737	0.0092751	0.00186194	0.0384728
INTERPRO	IPR001357:BRCT	13	0.53148	2.87503e-05	C18H2.3, F26D2.10, C18H2.5, C18H2.4, T08G3.7, F36D3.5, REV-1, K09D9.11, C01G10.1, F56H1.3, F37A4.4, C18H2.1, F40E12.2	1456	30	13633	4.05744	0.0237771	0.000890875	0.0443847
INTERPRO	IPR008498:Protein of unknown function DUF780, Caenorhabditis species	7	0.286182	3.38737e-05	NSPD-7, NSPD-6, NSPD-5, NSPD-4, NSPD-9, NSPD-10, NSPD-1, NSPD-2, NSPD-3	1456	8	13633	8.19291	0.0279546	0.00101209	0.0522922
SP_PIR_KEYWORDS	phosphoric monoester hydrolase	14	0.572363	4.14406e-05	F58G1.3, T16G12.7, R08C7.8, F42G8.8, ZK938.1, GSP-4, W03D8.2, Y69E1A.4, C47A4.3, F49E11.7, C34D4.2, F25B3.4, F52H3.6, Y40H4A.2	2374	32	19674	3.62568	0.00800742	0.00160664	0.0516701
GOTERM_BP_1	GO:0008152~metabolic process	414	16.9256	7.07212e-05	VY10G11R.1, TAG-191, H12I13.1, C31H1.5, SKR-10, DPF-2, Y19D10B.6, NHR-7, C14A4.13, Y51A2B.4, E04F6.4, C27D8.1, F54H5.2, T22C1.8, SKR-12, SKR-13, TRXR-2, W03A5.1, K06B9.2, C09B9.4, CYN-10, F42C5.5, F57B9.8, NAS-38, M7.7, CYC-2.2, PAF-1, KIN-21, KIN-24, NAS-30, C27D6.11, DAF-8, DAF-9, Y18H1A.9, B0207.7, GLT-5, NAS-28, ACDH-5, NAS-25, T19D2.1, R09E10.9, C33H5.16, K09F6.3, UGT-42, T25D3.3, UGT-41, C4…	815	3776	8513	1.14523	0.00120158	0.00120158	0.0511945
SMART	SM00292:BRCT	13	0.53148	9.0244e-05	C18H2.3, F26D2.10, C18H2.5, C18H2.4, T08G3.7, F36D3.5, REV-1, K09D9.11, C01G10.1, F56H1.3, F37A4.4, C18H2.1, F40E12.2	666	30	5537	3.60265	0.015314	0.00256877	0.110149
INTERPRO	IPR013069:BTB/POZ	25	1.02208	0.000103694	Y43E12A.3, F55B11.7, BTB-2, F47D12.7, B0496.1, B0496.2, KEL-10, Y108F1.5, BTB-17, BTB-16, BTB-8, BATH-27, BATH-1, BTB-10, R09A1.2, BATH-13, F27C8.5, BTB-11, BATH-21, BTB-12, BTB-13, K08E4.7, C17H12.12, R10D12.8, BATH-2	1456	100	13633	2.34083	0.0831363	0.00298851	0.159996
GOTERM_BP_5	GO:0030704~vitelline membrane formation	9	0.367948	0.000154887	Y57G11A.2, Y39A3A.3, Y39F10C.1, Y54E2A.9, C08G5.3, Y37E11AL.4, T02H6.9, T02H6.7, R105.1	589	20	6749	5.15628	0.0632768	0.0129884	0.2175
PIR_SUPERFAMILY	PIRSF015697:uncharacterized protein	12	0.490597	0.000170077	T20D4.15, F35F10.13, T28A11.3, C36C5.12, T28A11.19, C17B7.4, T20D4.10, T28A11.16, T20D4.11, C17B7.3, T20D4.12, C03G6.5	533	28	4541	3.6513	0.0542621	0.00925521	0.230119
SMART	SM00256:FBOX	75	3.06623	0.000173548	R03H10.1, SDZ-33, FBXB-17, FBXB-13, F34D6.1, FBXB-15, FBXB-98, FBXA-223, FBXB-59, F35E2.8, Y20C6A.1, FBXB-95, FBXA-224, FBXB-93, FBXB-56, FBXB-54, Y6E2A.10, T26E3.5, SDZ-9, FBXA-94, FBXB-85, FBXA-163, FBXB-46, FBXB-45, FBXB-7, FBXB-8, FBXB-41, FBXA-120, W04A8.3, K10G4.10, Y40B10A.4, SDZ-10, FBXB-106, W08F4.12, K05F6.4, FBXB-34, FBXA-111, T08E11.1, FBXA-113, FBXA-114, FBXA-83, FBXA-115, Y53F4B.24,…	666	413	5537	1.50977	0.0292432	0.00423093	0.21173
GOTERM_BP_4	GO:0030704~vitelline membrane formation	9	0.367948	0.000217179	Y57G11A.2, Y39A3A.3, Y39F10C.1, Y54E2A.9, C08G5.3, Y37E11AL.4, T02H6.9, T02H6.7, R105.1	703	20	7683	4.91799	0.0907498	0.0188471	0.306484
GOTERM_BP_FAT	GO:0030704~vitelline membrane formation	9	0.367948	0.000232209	Y57G11A.2, Y39A3A.3, Y39F10C.1, Y54E2A.9, C08G5.3, Y37E11AL.4, T02H6.9, T02H6.7, R105.1	724	20	7838	4.87169	0.166459	0.0298897	0.354905
SMART	SM00034:CLECT	50	2.04415	0.000306957	CLEC-210, C49C3.11, CLEC-66, CLEC-260, CLEC-65, CLEC-123, CLEC-160, CLEC-27, CLEC-26, CLEC-60, CLEC-24, CLEC-266, CLEC-166, CLEC-169, CLEC-265, CLEC-198, CLEC-222, CLEC-119, CLEC-117, CLEC-4, CLEC-151, CLEC-36, CLEC-72, CLEC-35, CLEC-73, CLEC-154, CLEC-153, CLEC-79, CLEC-48, CLEC-82, CLEC-184, CLEC-83, CLEC-86, CLEC-40, CLEC-242, CLEC-186, Y38H6C.8, CLEC-245, CLEC-246, CLEC-173, CLEC-57, CLEC-94,…	666	251	5537	1.65614	0.0511435	0.00654073	0.374209
PIR_SUPERFAMILY	PIRSF019652:major sperm protein	6	0.245298	0.000371941	MSP-56, MSP-31, MSP-57, MSP-45, MSP-33, MSP-59, MSP-53, MSP-36, MSP-19, MSP-55, MSP-38, MSP-81, MSP-113, MSP-49, F58A6.9, MSP-10, ZK546.3, MSP-79, MSP-78, MSP-64, MSP-77, MSP-63, MSP-76, MSP-3, MSP-65, MSP-51, MSP-50, MSP-142, MSP-40, MSP-152	533	7	4541	7.3026	0.114869	0.0172803	0.502611
SP_PIR_KEYWORDS	iron	42	1.71709	0.000392256	C27B7.6, DAF-9, Y71G12B.30, T16G12.7, LET-268, GSP-3, GSP-4, C06A1.3, R08A2.2, Y69E1A.4, F49E11.7, CYP-33C5, F23B12.1, CYP-33C2, F52H3.6, PXN-1, CYP-14A3, CYP-33C9, Y40H4A.2, C23G10.1, F58G1.3, Y54G2A.24, CYP-34A4, CYP-13B1, CAT-2, CYP-34A10, CYP-25A2, CYP-25A1, F42G8.8, CYP-34A6, GBH-1, ZK938.1, W03D8.2, C47A4.3, CYC-2.2, C34D4.2, F25B3.4, CYP-33D3, T25B9.2, CYP-29A4, F26B1.5, R13A5.11	2374	199	19674	1.74907	0.0732881	0.0126053	0.4881
GOTERM_BP_FAT	GO:0043062~extracellular structure organization	11	0.449714	0.000411993	Y57G11A.2, Y39A3A.3, Y39F10C.1, Y54E2A.9, C08G5.3, Y37E11AL.4, DYB-1, T02H6.9, T02H6.7, R105.1, SYG-2	724	32	7838	3.72143	0.276076	0.0451039	0.628877
GOTERM_MF_2	GO:0008316~structural constituent of vitelline membrane	9	0.367948	0.000415786	Y57G11A.2, Y39A3A.3, Y39F10C.1, Y54E2A.9, C08G5.3, Y37E11AL.4, T02H6.9, T02H6.7, R105.1	892	20	8884	4.48184	0.0177236	0.00357011	0.386262
UP_SEQ_FEATURE	region of interest:Triple-helical region	10	0.408831	0.000423406	COL-145, COL-10, COL-13, DPY-13, COL-12, COL-79, COL-14, DPY-5, BLI-1, COL-7	239	33	3249	4.11944	0.237089	0.0862558	0.628874
INTERPRO	IPR002542:Protein of unknown function DUF19	15	0.613246	0.000430987	T20D4.15, F35F10.13, C36C5.12, C04E12.2, C36C5.15, C04E12.4, T08G5.3, T28A11.3, T28A11.19, C17B7.4, T20D4.10, T28A11.16, T20D4.11, C17B7.3, T20D4.12, C03G6.5	1456	49	13633	2.86632	0.302891	0.0119551	0.663428
GOTERM_BP_2	GO:0043062~extracellular structure organization	11	0.449714	0.000465749	Y57G11A.2, Y39A3A.3, Y39F10C.1, Y54E2A.9, C08G5.3, Y37E11AL.4, DYB-1, T02H6.9, T02H6.7, R105.1, SYG-2	761	32	8116	3.66606	0.0534875	0.0181569	0.531726
INTERPRO	IPR008271:Serine/threonine protein kinase, active site	40	1.63532	0.000477156	K06H7.8, T19D12.5, F26A1.3, C25H3.1, ZK666.8, ZC373.3, Y47G6A.13, C08F8.6, D2045.5, C03C10.2, T15B12.2, W06F12.3, F41G3.5, C55C3.8, C04G2.2, W02B12.12, TAG-344, ZK596.2, F21F3.2, ZK354.6, C39H7.1, GSKA-3, T11F8.4, W01B6.2, NEKL-1, TPA-1, R13H9.5, ZC581.2, C50F4.10, F26A1.4, CMK-1, TTN-1, Y38H8A.4, ZK507.3, Y38H8A.3, F49C5.4, F32B6.10, K11C4.1, Y106G6E.1, C27D6.11	1456	212	13633	1.76666	0.329328	0.0128036	0.734253
GOTERM_CC_3	GO:0031143~pseudopodium	5	0.204415	0.000497027	MSP-56, MSP-31, MSP-57, MSP-45, MSP-33, MSP-59, MSP-53, MSP-36, MSP-19, MSP-55, MSP-38, MSP-81, MSP-113, MSP-49, F58A6.9, MSP-10, MSP-79, MSP-78, MSP-64, MSP-77, MSP-63, MSP-76, MSP-3, MSP-65, MSP-51, MSP-50, MSP-142, MSP-40, MSP-152	967	5	9458	9.78077	0.0389915	0.00989375	0.527135
GOTERM_BP_FAT	GO:0030198~extracellular matrix organization	9	0.367948	0.000498843	Y57G11A.2, Y39A3A.3, Y39F10C.1, Y54E2A.9, C08G5.3, Y37E11AL.4, T02H6.9, T02H6.7, R105.1	724	22	7838	4.4288	0.323748	0.0477225	0.760973
INTERPRO	IPR002900:Protein of unknown function DUF38, Caenorhabditis species	42	1.71709	0.000511885	Y40B10A.4, FBXA-111, T08E11.1, FBXA-113, FBXA-114, FBXA-83, FBXA-115, FBXA-223, FBXA-192, FBXA-155, FBXA-42, FBXA-43, FBXA-202, FBXA-136, FBXA-135, FBXA-196, Y20C6A.1, FBXA-134, FBXA-224, FBXA-158, FBXA-153, F47H4.2, R05C11.2, C17C3.5, K10G4.5, FBXA-94, FBXA-129, FBXA-218, FBXA-104, FBXA-71, FBXA-125, FBXA-143, FBXA-108, FBXA-163, FBXA-30, FBXA-185, FBXA-39, FBXA-188, FBXA-189, FBXA-120, FBXA-166…	1456	227	13633	1.73242	0.348552	0.0133031	0.787498
GOTERM_BP_3	GO:0030198~extracellular matrix organization	9	0.367948	0.000515674	Y57G11A.2, Y39A3A.3, Y39F10C.1, Y54E2A.9, C08G5.3, Y37E11AL.4, T02H6.9, T02H6.7, R105.1	734	22	7908	4.40748	0.144247	0.0381949	0.687598
GOTERM_CC_4	GO:0031143~pseudopodium	5	0.204415	0.000582155	MSP-56, MSP-31, MSP-57, MSP-45, MSP-33, MSP-59, MSP-53, MSP-36, MSP-19, MSP-55, MSP-38, MSP-81, MSP-113, MSP-49, F58A6.9, MSP-10, MSP-79, MSP-78, MSP-64, MSP-77, MSP-63, MSP-76, MSP-3, MSP-65, MSP-51, MSP-50, MSP-142, MSP-40, MSP-152	940	5	8829	9.39255	0.0565693	0.0115789	0.644257
INTERPRO	IPR005552:Scramblase	6	0.245298	0.00058379	SCRM-8, SCRM-6, SCRM-7, SCRM-4, SCRM-5, SCRM-3	1456	8	13633	7.02249	0.386623	0.0147022	0.897652
GOTERM_MF_FAT	GO:0032555~purine ribonucleotide binding	160	6.54129	0.000610149	K06H7.8, VY10G11R.1, F23F1.5, C18H7.4, ZK666.8, F26A1.3, TAG-191, R10D12.10, H12I13.1, F01D4.3, W09C3.1, C03C10.2, C14A4.13, W06F12.3, C27D8.1, ABT-5, F54H5.2, ABT-1, F26E4.5, FBXB-54, ZK596.2, W03A5.1, CKB-3, C09B9.4, ZC581.7, F57B9.8, OLD-1, R13H9.6, TPA-1, R13H9.5, M7.7, ZC581.2, W04C9.5, F26A1.4, KIN-21, KIN-24, F22B3.8, C27D6.11, MEC-7, T19D12.5, B0207.7, C56C10.6, ZC373.3, Y47G6A.13, Y69E1A…	756	1120	6686	1.26342	0.199703	0.0157864	0.836431
GOTERM_MF_FAT	GO:0032553~ribonucleotide binding	160	6.54129	0.000610149	K06H7.8, VY10G11R.1, F23F1.5, C18H7.4, ZK666.8, F26A1.3, TAG-191, R10D12.10, H12I13.1, F01D4.3, W09C3.1, C03C10.2, C14A4.13, W06F12.3, C27D8.1, ABT-5, F54H5.2, ABT-1, F26E4.5, FBXB-54, ZK596.2, W03A5.1, CKB-3, C09B9.4, ZC581.7, F57B9.8, OLD-1, R13H9.6, TPA-1, R13H9.5, M7.7, ZC581.2, W04C9.5, F26A1.4, KIN-21, KIN-24, F22B3.8, C27D6.11, MEC-7, T19D12.5, B0207.7, C56C10.6, ZC373.3, Y47G6A.13, Y69E1A…	756	1120	6686	1.26342	0.199703	0.0157864	0.836431
INTERPRO	IPR005515:Vitelline membrane outer layer protein I (VOMI)	9	0.367948	0.000639896	Y57G11A.2, Y39A3A.3, Y39F10C.1, Y54E2A.9, C08G5.3, Y37E11AL.4, T02H6.9, T02H6.7, R105.1	1456	20	13633	4.2135	0.414778	0.0156343	0.983524
INTERPRO	IPR000210:BTB/POZ-like	30	1.22649	0.00069298	F22E5.6, BTB-2, B0496.1, B0496.2, Y108F1.5, BTB-17, BTB-16, BTB-8, BATH-27, T05E12.3, BATH-1, ZK418.2, BATH-21, FBXB-52, BATH-2, Y43E12A.3, F47D12.7, F55B11.7, KEL-10, BTB-10, R09A1.2, BTB-11, F27C8.5, BATH-13, BTB-12, BTB-13, K08E4.7, C17H12.12, R10D12.8, F22E5.8	1456	146	13633	1.92397	0.440228	0.0164412	1.06471
GOTERM_MF_2	GO:0000166~nucleotide binding	172	7.03189	0.000765528	K06H7.8, VY10G11R.1, F23F1.5, C18H7.4, ZK666.8, F26A1.3, TAG-191, R10D12.10, CPB-2, H12I13.1, F01D4.3, C03C10.2, W09C3.1, C14A4.13, W06F12.3, C27D8.1, F07F6.1, ABT-5, F54H5.2, TRXR-2, ABT-1, F26E4.5, FBXB-54, ZK596.2, W03A5.1, CKB-3, C09B9.4, ZC581.7, F57B9.8, OLD-1, R13H9.6, TPA-1, R13H9.5, M7.7, ZC581.2, W04C9.5, F26A1.4, KIN-21, KIN-24, F22B3.8, C27D6.11, MEC-7, T19D12.5, B0207.7, C56C10.6, ZC…	892	1369	8884	1.25132	0.032394	0.00547335	0.710138
PIR_SUPERFAMILY	PIRSF015994:Caenorhabditis elegans hypothetical protein F36D3.5	5	0.204415	0.000845735	F26D2.10, C18H2.5, T08G3.7, F36D3.5, F37A4.4	533	5	4541	8.5197	0.242339	0.034095	1.13947
GOTERM_CC_FAT	GO:0031143~pseudopodium	5	0.204415	0.000849351	MSP-56, MSP-31, MSP-57, MSP-45, MSP-33, MSP-59, MSP-53, MSP-36, MSP-19, MSP-55, MSP-38, MSP-81, MSP-113, MSP-49, F58A6.9, MSP-10, MSP-79, MSP-78, MSP-64, MSP-77, MSP-63, MSP-76, MSP-3, MSP-65, MSP-51, MSP-50, MSP-142, MSP-40, MSP-152	928	5	7912	8.52586	0.103057	0.0268244	0.981945
GOTERM_MF_FAT	GO:0008316~structural constituent of vitelline membrane	9	0.367948	0.000925964	Y57G11A.2, Y39A3A.3, Y39F10C.1, Y54E2A.9, C08G5.3, Y37E11AL.4, T02H6.9, T02H6.7, R105.1	756	20	6686	3.97976	0.2869	0.02229	1.26682
GOTERM_BP_5	GO:0030259~lipid glycosylation	12	0.490597	0.00106629	UGT-41, UGT-31, UGT-11, UGT-30, UGT-2, UGT-46, UGT-13, UGT-36, UGT-25, UGT-14, UGT-8, UGT-40	589	44	6749	3.12502	0.362508	0.0722894	1.48846
GOTERM_BP_2	GO:0044237~cellular metabolic process	293	11.9787	0.00120074	VY10G11R.1, TAG-191, R10D12.10, ZK484.7, H12I13.1, C31H1.5, EAK-6, SKR-10, NHR-7, C14A4.13, C27D8.1, F54H5.2, SKR-12, T22C1.8, TRXR-2, SKR-13, HDL-1, FBXB-54, W03A5.1, NHR-145, C09B9.4, C07E3.4, CYN-10, F57B9.8, F42C5.5, F55H12.5, OLD-1, ZK287.7, M7.7, CYC-2.2, UGT-2, KIN-21, KIN-24, C27D6.11, F55D12.6, UGT-8, DAF-8, T19D12.5, NHR-116, B0207.7, C56C10.6, R09E10.9, C33H5.16, K09F6.3, C46A5.1, UGT-…	761	2709	8116	1.1535	0.132181	0.0348224	1.36559
GOTERM_MF_FAT	GO:0017076~purine nucleotide binding	166	6.78659	0.0012713	K06H7.8, VY10G11R.1, F23F1.5, C18H7.4, ZK666.8, F26A1.3, TAG-191, R10D12.10, H12I13.1, F01D4.3, W09C3.1, C03C10.2, C14A4.13, W06F12.3, C27D8.1, ABT-5, F54H5.2, TRXR-2, ABT-1, F26E4.5, FBXB-54, ZK596.2, W03A5.1, CKB-3, C09B9.4, ZC581.7, F57B9.8, OLD-1, R13H9.6, TPA-1, R13H9.5, M7.7, ZC581.2, W04C9.5, F26A1.4, KIN-21, KIN-24, F22B3.8, C27D6.11, MEC-7, T19D12.5, B0207.7, C56C10.6, ZC373.3, Y47G6A.13…	756	1187	6686	1.23681	0.371436	0.0286028	1.73545
GOTERM_BP_FAT	GO:0030259~lipid glycosylation	12	0.490597	0.00171292	UGT-41, UGT-31, UGT-11, UGT-30, UGT-2, UGT-46, UGT-13, UGT-36, UGT-25, UGT-14, UGT-8, UGT-40	724	44	7838	2.95254	0.73922	0.138725	2.59046
SP_PIR_KEYWORDS	metalloprotein	23	0.940311	0.0017947	F58G1.3, SOD-3, CYP-34A4, CYP-13B1, T16G12.7, CYP-25A2, CYP-34A10, F42G8.8, CYP-34A6, ZK938.1, W03D8.2, GSP-4, Y69E1A.4, F49E11.7, CYC-2.2, C34D4.2, F25B3.4, CYP-33D3, F52H3.6, SOD-5, CYP-14A3, CYP-33C9, Y40H4A.2	2374	95	19674	2.00639	0.294244	0.0485648	2.21536
GOTERM_MF_FAT	GO:0005506~iron ion binding	46	1.88062	0.00240787	C27B7.6, DAF-9, Y71G12B.30, T16G12.7, LET-268, GSP-3, GSP-4, C06A1.3, R08A2.2, Y69E1A.4, F49E11.7, CYP-33C5, F23B12.1, CYP-33C2, GLB-30, GLB-8, F52H3.6, PXN-2, PXN-1, CYP-14A3, CYP-33C9, C23G10.1, F58G1.3, Y54G2A.24, VEM-1, CYP-13B1, CYP-34A4, CAT-2, CYP-34A10, CYP-25A2, CYP-25A1, F42G8.8, CYP-34A6, GBH-1, ZK938.1, W03D8.2, C47A4.3, CYC-2.2, C34D4.2, F25B3.4, CYP-33D3, T25B9.2, GLB-18, CYP-29A4, …	756	262	6686	1.55275	0.585189	0.050444	3.2633
GOTERM_BP_5	GO:0048515~spermatid differentiation	4	0.163532	0.00246174	SPE-15, SPE-8, SPE-10, SPE-4	589	4	6749	11.4584	0.646593	0.138078	3.40532
GOTERM_BP_5	GO:0007286~spermatid development	4	0.163532	0.00246174	SPE-15, SPE-8, SPE-10, SPE-4	589	4	6749	11.4584	0.646593	0.138078	3.40532
GOTERM_BP_4	GO:0048515~spermatid differentiation	4	0.163532	0.00283194	SPE-15, SPE-8, SPE-10, SPE-4	703	4	7683	10.9289	0.711237	0.187001	3.92857
GOTERM_BP_4	GO:0007286~spermatid development	4	0.163532	0.00283194	SPE-15, SPE-8, SPE-10, SPE-4	703	4	7683	10.9289	0.711237	0.187001	3.92857
GOTERM_BP_FAT	GO:0048515~spermatid differentiation	4	0.163532	0.00291211	SPE-15, SPE-8, SPE-10, SPE-4	724	4	7838	10.826	0.898371	0.204387	4.36653
GOTERM_BP_FAT	GO:0007286~spermatid development	4	0.163532	0.00291211	SPE-15, SPE-8, SPE-10, SPE-4	724	4	7838	10.826	0.898371	0.204387	4.36653
PIR_SUPERFAMILY	PIRSF019658:Caenorhabditis elegans hypothetical protein F32B6.7	6	0.245298	0.00329775	SSP-19, C34D4.3, SSP-16, SSP-31, SSP-11, SSP-10	533	10	4541	5.11182	0.661574	0.11342	4.37549
PIR_SUPERFAMILY	PIRSF000564:kinase-related transforming protein	11	0.449714	0.00337207	K06H7.8, F33D11.7, C50F4.10, Y38H8A.4, ZK666.8, TAG-344, B0218.5, ZK596.2, K08H2.5, F21F3.2, R13H9.5	533	33	4541	2.8399	0.669751	0.104874	4.47201
INTERPRO	IPR009676:Protein of unknown function DUF1265	6	0.245298	0.00365734	Y49F6B.8, F40G12.7, C25G4.8, C50E10.2, W03D8.7, C25G4.7	1456	11	13633	5.10727	0.95343	0.0816613	5.50065
SMART	SM00225:BTB	30	1.22649	0.00390485	F22E5.6, BTB-2, B0496.1, B0496.2, Y108F1.5, BTB-17, BTB-16, BTB-8, BATH-27, T05E12.3, BATH-1, ZK418.2, BATH-21, FBXB-52, BATH-2, Y43E12A.3, F47D12.7, F55B11.7, KEL-10, BTB-10, R09A1.2, BTB-11, F27C8.5, BATH-13, BTB-12, BTB-13, K08E4.7, C17H12.12, R10D12.8, F22E5.8	666	146	5537	1.70832	0.487798	0.0716416	4.66556
GOTERM_BP_5	GO:0030258~lipid modification	13	0.53148	0.00488582	UGT-41, UGT-11, UGT-31, UGT-30, UGT-2, UGT-13, UGT-46, UGT-25, UGT-36, UGT-14, F25C8.1, UGT-40, UGT-8	589	60	6749	2.48265	0.873418	0.227682	6.65303
INTERPRO	IPR002656:Acyltransferase 3	15	0.613246	0.00496595	OAC-32, OAC-31, OAC-30, OAC-36, OAC-23, OAC-49, OAC-22, OAC-9, OAC-37, OAC-56, OAC-27, OAC-58, OAC-19, OAC-52, OAC-40	1456	62	13633	2.26532	0.984499	0.106508	7.3991
PIR_SUPERFAMILY	PIRSF000925:tyrosine-protein phosphatase	6	0.245298	0.00546935	C17H12.3, T27A3.5, C33H5.16, ZK484.7, F47B3.7, F36H12.10	533	11	4541	4.64711	0.834514	0.150862	7.15922
GOTERM_BP_5	GO:0007283~spermatogenesis	8	0.327065	0.00556747	FER-1, SPE-15, SPE-8, SPE-27, SPE-17, SPE-11, SPE-10, SPE-4	589	26	6749	3.52566	0.905205	0.230321	7.54785
GOTERM_BP_5	GO:0001539~ciliary or flagellar motility	4	0.163532	0.00575588	TNC-2, F40G9.9, CHE-3, H06I04.5	589	5	6749	9.16672	0.91249	0.216199	7.79377
SP_PIR_KEYWORDS	atp-binding	101	4.12919	0.00577117	K06H7.8, VY10G11R.1, C18H7.4, ZK666.8, H12I13.1, F01D4.3, W09C3.1, C03C10.2, W06F12.3, C14A4.13, C27D8.1, ABT-5, F26E4.5, ZK596.2, CKB-3, W03A5.1, ZC581.7, F57B9.8, OLD-1, R13H9.6, TPA-1, ZC581.2, KIN-21, KIN-24, F22B3.8, C27D6.11, T19D12.5, B0207.7, Y69E1A.3, H05L14.1, T09B4.7, KIN-5, KLP-17, T06C10.3, NEKL-1, OSM-3, WHT-5, HSP-70, T25B9.4, WHT-3, T25B9.5, HAF-1, SPE-8, TTN-1, WHT-6, F49C5.4, F3…	2374	649	19674	1.2897	0.674649	0.130951	6.96396
GOTERM_CC_2	GO:0042995~cell projection	10	0.408831	0.00580405	MSP-56, MSP-57, MSP-31, MSP-33, MSP-59, MSP-53, MSP-19, MSP-36, MSP-55, MSP-38, F40G9.9, MSP-113, F58A6.9, MSP-10, MSP-64, MSP-63, MSP-3, MSP-65, CHE-3, MSP-40, MSP-152, MSP-45, TNC-2, MSP-81, H06I04.5, MSP-49, MSP-79, MSP-78, MSP-77, MSP-76, MSP-51, MSP-50, MSP-142, BBS-5	967	34	9458	2.8767	0.174769	0.0620237	4.95392
GOTERM_CC_3	GO:0042995~cell projection	10	0.408831	0.00580405	MSP-56, MSP-57, MSP-31, MSP-33, MSP-59, MSP-53, MSP-19, MSP-36, MSP-55, MSP-38, F40G9.9, MSP-113, F58A6.9, MSP-10, MSP-64, MSP-63, MSP-3, MSP-65, CHE-3, MSP-40, MSP-152, MSP-45, TNC-2, MSP-81, H06I04.5, MSP-49, MSP-79, MSP-78, MSP-77, MSP-76, MSP-51, MSP-50, MSP-142, BBS-5	967	34	9458	2.8767	0.37229	0.0889299	6.00077
PIR_SUPERFAMILY	PIRSF016383:uncharacterized conserved protein	4	0.163532	0.00584038	W03D8.9, K06A5.2, Y69E1A.1, W03D8.10	533	4	4541	8.5197	0.853578	0.147946	7.62727
INTERPRO	IPR014044:SCP-like extracellular	10	0.408831	0.00629451	SCL-15, D2062.1, SCL-25, SCL-17, SCL-23, SCL-24, SCL-21, SCL-6, VAP-1, SCL-3	1456	33	13633	2.83737	0.994934	0.129844	9.28995
GOTERM_BP_4	GO:0001539~ciliary or flagellar motility	4	0.163532	0.00659888	TNC-2, F40G9.9, CHE-3, H06I04.5	703	5	7683	8.7431	0.944971	0.339177	8.93217
GOTERM_BP_FAT	GO:0001539~ciliary or flagellar motility	4	0.163532	0.00678093	TNC-2, F40G9.9, CHE-3, H06I04.5	724	5	7838	8.66077	0.995177	0.384267	9.89232
GOTERM_BP_3	GO:0001539~ciliary or flagellar motility	4	0.163532	0.00687561	TNC-2, F40G9.9, CHE-3, H06I04.5	734	5	7908	8.61907	0.875519	0.340795	8.8159
GOTERM_BP_4	GO:0030258~lipid modification	13	0.53148	0.0071601	UGT-41, UGT-11, UGT-31, UGT-30, UGT-2, UGT-13, UGT-46, UGT-25, UGT-36, UGT-14, F25C8.1, UGT-40, UGT-8	703	60	7683	2.36792	0.957037	0.325259	9.65656
GOTERM_BP_4	GO:0048232~male gamete generation	8	0.327065	0.00723774	FER-1, SPE-15, SPE-8, SPE-27, SPE-17, SPE-11, SPE-10, SPE-4	703	26	7683	3.36273	0.958483	0.297786	9.75635
GOTERM_BP_4	GO:0007283~spermatogenesis	8	0.327065	0.00723774	FER-1, SPE-15, SPE-8, SPE-27, SPE-17, SPE-11, SPE-10, SPE-4	703	26	7683	3.36273	0.958483	0.297786	9.75635
INTERPRO	IPR004045:Glutathione S-transferase, N-terminal	13	0.53148	0.00749039	GST-15, GST-41, GST-14, F56A4.3, GST-19, GST-4, GST-2, GST-25, GST-33, GST-24, GST-35, GST-21, GST-31	1456	52	13633	2.34083	0.998151	0.149015	10.961
GOTERM_BP_FAT	GO:0048232~male gamete generation	8	0.327065	0.00762232	FER-1, SPE-15, SPE-8, SPE-27, SPE-17, SPE-11, SPE-10, SPE-4	724	26	7838	3.33107	0.997518	0.393408	11.0539
GOTERM_BP_FAT	GO:0007283~spermatogenesis	8	0.327065	0.00762232	FER-1, SPE-15, SPE-8, SPE-27, SPE-17, SPE-11, SPE-10, SPE-4	724	26	7838	3.33107	0.997518	0.393408	11.0539
GOTERM_BP_FAT	GO:0030258~lipid modification	13	0.53148	0.00771564	UGT-41, UGT-11, UGT-31, UGT-30, UGT-2, UGT-13, UGT-46, UGT-25, UGT-36, UGT-14, F25C8.1, UGT-40, UGT-8	724	60	7838	2.34563	0.997695	0.373193	11.1818
INTERPRO	IPR001283:Allergen V5/Tpx-1 related	10	0.408831	0.00776679	SCL-15, D2062.1, SCL-25, SCL-17, SCL-23, SCL-24, SCL-21, SCL-6, VAP-1, SCL-3	1456	34	13633	2.75392	0.998535	0.15054	11.3431
KEGG_PATHWAY	cel04120:Ubiquitin mediated proteolysis	9	0.367948	0.00780841	SKR-10, SKR-5, F52C6.12, UBC-24, ELC-1, SKR-9, SKR-12, SKR-13, APC-10	54	86	1534	2.97287	0.380091	0.380091	7.58089
GOTERM_BP_3	GO:0048232~male gamete generation	8	0.327065	0.00782557	FER-1, SPE-15, SPE-8, SPE-27, SPE-17, SPE-11, SPE-10, SPE-4	734	26	7908	3.31503	0.906764	0.326614	9.97574
INTERPRO	IPR011333:BTB/POZ fold	28	1.14473	0.00913613	F22E5.6, BTB-2, ELC-1, Y108F1.5, BTB-17, BTB-16, BTB-8, BATH-27, SKR-10, T05E12.3, BATH-1, SKR-12, BATH-21, SKR-13, BATH-2, SKR-5, SKR-9, BTB-10, R09A1.2, BTB-11, F27C8.5, BATH-13, BTB-12, BTB-13, K08E4.7, C16D2.1, R10D12.8, F22E5.8	1456	158	13633	1.65932	0.999539	0.170861	13.2137
GOTERM_MF_2	GO:0030246~carbohydrate binding	29	1.18561	0.00982081	LEC-8, UGT-41, CLEC-82, CLEC-83, UGT-46, CLEC-160, UGT-25, CLEC-86, CLEC-166, UGT-40, CLEC-169, Y73F4A.2, LEC-10, CLEC-117, AMAN-3, CLEC-173, UGT-11, UGT-31, UGT-30, UGT-2, UGT-13, UGT-36, CLEC-72, CLEC-73, UGT-14, CLEC-52, CLEC-79, CLEC-53, UGT-8	892	177	8884	1.63181	0.345826	0.0588249	8.77526
INTERPRO	IPR010601:Protein of unknown function DUF1182	4	0.163532	0.0102779	F16D3.6, B0546.5, ZK757.1, Y69H2.1	1456	5	13633	7.49066	0.999824	0.186072	14.745
UP_SEQ_FEATURE	domain:EGF-like 5	4	0.163532	0.0108897	SPE-9, ZC116.3, LRP-1, MUA-3	239	7	3249	7.76808	0.999085	0.826083	15.0501
GOTERM_MF_2	GO:0005326~neurotransmitter transporter activity	7	0.286182	0.0113161	MOD-5, DYB-1, SNF-10, SNF-8, SNF-5, SNF-2, F56F4.3	892	20	8884	3.48587	0.386986	0.0593375	10.0492
COG_ONTOLOGY	Secondary metabolites biosynthesis, transport, and catabolism	14	0.572363	0.0115701	DAF-9, CYP-34A4, CYP-13B1, CYP-25A2, CYP-34A10, CYP-25A1, CYP-34A6, CYP-33C5, CYP-33D3, CYP-33C2, BCMO-1, CYP-29A4, CYP-14A3, CYP-33C9	93	81	1118	2.07779	0.252438	0.252438	9.00974
PIR_SUPERFAMILY	PIRSF017573:PIRSF017573	4	0.163532	0.0133324	C14A6.6, C14A6.13, W04E12.5, W04E12.4	533	5	4541	6.81576	0.987752	0.287267	16.623
GOTERM_MF_3	GO:0005328~neurotransmitter:sodium symporter activity	6	0.245298	0.0133742	MOD-5, SNF-10, SNF-8, SNF-5, SNF-2, F56F4.3	685	16	7243	3.96515	0.672919	0.16994	13.4273
INTERPRO	IPR006570:SPK	10	0.408831	0.0137707	Y73B3B.1, Y57A10A.3, B0513.6, Y57A10A.8, R05D7.2, CSP-1, C08F11.7, Y45F10C.1, H12I13.1, C17C3.15	1456	37	13633	2.53063	0.999991	0.236553	19.2744
GOTERM_CC_FAT	GO:0042995~cell projection	10	0.408831	0.0139309	MSP-56, MSP-57, MSP-31, MSP-33, MSP-59, MSP-53, MSP-19, MSP-36, MSP-55, MSP-38, F40G9.9, MSP-113, F58A6.9, MSP-10, MSP-64, MSP-63, MSP-3, MSP-65, CHE-3, MSP-40, MSP-152, MSP-45, TNC-2, MSP-81, H06I04.5, MSP-49, MSP-79, MSP-78, MSP-77, MSP-76, MSP-51, MSP-50, MSP-142, BBS-5	928	34	7912	2.50761	0.833988	0.301723	15.0342
SMART	SM00198:SCP	10	0.408831	0.0161369	SCL-15, D2062.1, SCL-25, SCL-17, SCL-23, SCL-24, SCL-21, SCL-6, VAP-1, SCL-3	666	34	5537	2.44524	0.93808	0.242848	18.0179
INTERPRO	IPR017933:Glutathione S-transferase/chloride channel, C-terminal	12	0.490597	0.0194848	GST-15, GST-41, GST-14, GST-4, GST-19, GST-2, GST-25, GST-24, GST-33, GST-35, GST-21, GST-31	1456	52	13633	2.16077	1	0.312238	26.202
GOTERM_MF_FAT	GO:0005326~neurotransmitter transporter activity	7	0.286182	0.0196138	MOD-5, DYB-1, SNF-10, SNF-8, SNF-5, SNF-2, F56F4.3	756	20	6686	3.09537	0.999276	0.330803	23.861
COG_ONTOLOGY	Cell division and chromosome partitioning	9	0.367948	0.0202092	VY10G11R.1, C23H4.6, EEED8.14, F21C10.7, F01G10.5, H40L08.3, F46C5.6, CHE-3, H12I13.1	93	43	1118	2.51613	0.399747	0.22524	15.265
SP_PIR_KEYWORDS	cuticle	10	0.408831	0.0202442	COL-145, COL-10, COL-13, DPY-13, COL-12, COL-79, COL-14, DPY-5, BLI-1, COL-7	2374	35	19674	2.36779	0.981083	0.356513	22.5134
INTERPRO	IPR000175:Sodium:neurotransmitter symporter	6	0.245298	0.0219847	MOD-5, SNF-10, SNF-8, SNF-5, SNF-2, F56F4.3	1456	16	13633	3.51125	1	0.338654	29.0545
GOTERM_MF_3	GO:0004497~monooxygenase activity	18	0.735895	0.0221296	DAF-9, CYP-34A4, CYP-13B1, Y73F4A.2, CAT-2, CYP-25A2, CYP-34A10, CYP-25A1, CYP-34A6, CYP-33C5, CYP-33D3, CYP-33C2, T10E9.3, CYP-29A4, COQ-6, CYP-14A3, CYP-33C9, FMO-5	685	107	7243	1.77876	0.843919	0.233055	21.3088
UP_SEQ_FEATURE	domain:EGF-like 3	4	0.163532	0.0234187	CDH-4, SPE-9, LRP-1, MUA-3	239	9	3249	6.04184	1	0.951612	29.7427
INTERPRO	IPR003439:ABC transporter-like	12	0.490597	0.0253845	PGP-13, PGP-7, WHT-4, WHT-5, PGP-14, WHT-3, PGP-12, HAF-1, ABT-5, WHT-6, PGP-8, CFT-1	1456	54	13633	2.08074	1	0.373654	32.7685
INTERPRO	IPR002213:UDP-glucuronosyl/UDP-glucosyltransferase	16	0.654129	0.0257074	K02E11.3, UGT-42, UGT-41, UGT-31, UGT-11, UGT-30, UGT-2, UGT-46, UGT-13, UGT-25, UGT-36, UGT-14, K02E11.6, T19H12.3, UGT-8, UGT-40	1456	82	13633	1.82699	1	0.371109	33.1116
GOTERM_MF_FAT	GO:0005328~neurotransmitter:sodium symporter activity	6	0.245298	0.0273701	MOD-5, SNF-10, SNF-8, SNF-5, SNF-2, F56F4.3	756	16	6686	3.31647	0.99996	0.413231	31.7451
SMART	SM00583:SPK	10	0.408831	0.0276241	Y73B3B.1, Y57A10A.3, B0513.6, Y57A10A.8, R05D7.2, CSP-1, C08F11.7, Y45F10C.1, H12I13.1, C17C3.15	666	37	5537	2.24698	0.991689	0.353041	28.9716
UP_SEQ_FEATURE	repeat:Kelch 6	3	0.122649	0.0290473	F47D12.7, SPE-26, KEL-10	239	4	3249	10.1956	1	0.956689	35.5391
UP_SEQ_FEATURE	repeat:Kelch 3	3	0.122649	0.0290473	F47D12.7, SPE-26, KEL-10	239	4	3249	10.1956	1	0.956689	35.5391
UP_SEQ_FEATURE	repeat:Kelch 1	3	0.122649	0.0290473	F47D12.7, SPE-26, KEL-10	239	4	3249	10.1956	1	0.956689	35.5391
UP_SEQ_FEATURE	repeat:Kelch 2	3	0.122649	0.0290473	F47D12.7, SPE-26, KEL-10	239	4	3249	10.1956	1	0.956689	35.5391
UP_SEQ_FEATURE	repeat:Kelch 4	3	0.122649	0.0290473	F47D12.7, SPE-26, KEL-10	239	4	3249	10.1956	1	0.956689	35.5391
UP_SEQ_FEATURE	repeat:Kelch 5	3	0.122649	0.0290473	F47D12.7, SPE-26, KEL-10	239	4	3249	10.1956	1	0.956689	35.5391
UP_SEQ_FEATURE	short sequence motif:Cell attachment site	3	0.122649	0.0290473	CDH-4, SPE-9, PAT-2	239	4	3249	10.1956	1	0.956689	35.5391
INTERPRO	IPR009564:Protein of unknown function DUF1179	4	0.163532	0.0305309	H38K22.6, H38K22.7, C06C6.8, Y57G7A.3	1456	7	13633	5.35047	1	0.417648	38.0462
UP_SEQ_FEATURE	domain:EGF-like 1	5	0.204415	0.0312791	CDH-4, SPE-9, ZC116.3, LRP-1, MUA-3	239	17	3249	3.99828	1	0.945029	37.7114
INTERPRO	IPR015737:Testis-specific serine-threonine kinase	3	0.122649	0.0317237	Y38H8A.4, TAG-344, C27D6.11	1456	3	13633	9.36332	1	0.423439	39.2127
KEGG_PATHWAY	cel04350:TGF-beta signaling pathway	5	0.204415	0.0329848	SKR-10, SKR-5, SKR-9, SKR-12, SKR-13	54	36	1534	3.94547	0.87075	0.640486	28.6319
INTERPRO	IPR001878:Zinc finger, CCHC-type	9	0.367948	0.0330003	F54G2.2, F49F1.8, C38D9.2, F15D4.5, ZC15.1, DCT-10, K02F6.1, K08D12.3, Y43F4A.3	1456	36	13633	2.34083	1	0.429788	40.4386
COG_ONTOLOGY	General function prediction only / Signal transduction mechanisms / Transcription / DNA replication, recombination, and repair	3	0.122649	0.0360283	K09C6.8, K09C6.7, C04G2.2	93	4	1118	9.01613	0.600417	0.26345	25.7477
PIR_SUPERFAMILY	PIRSF015801:Caenorhabditis elegans hypothetical protein K08D10.7	3	0.122649	0.0379074	SCRM-8, SCRM-6, SCRM-5	533	3	4541	8.5197	0.999997	0.595615	40.7516
PIR_SUPERFAMILY	PIRSF028860:Caenorhabditis elegans hypothetical protein C24D10.1	3	0.122649	0.0379074	Y57G11C.6, C17H12.5, C24D10.1	533	3	4541	8.5197	0.999997	0.595615	40.7516
PIR_SUPERFAMILY	PIRSF019680:PIRSF019680	3	0.122649	0.0379074	C06C6.7, C06C6.6, F36G9.13	533	3	4541	8.5197	0.999997	0.595615	40.7516
PIR_SUPERFAMILY	PIRSF016405:Caenorhabditis elegans hypothetical protein F36D3.4	3	0.122649	0.0379074	F36D3.4, F53B6.4, F21H7.5	533	3	4541	8.5197	0.999997	0.595615	40.7516
PIR_SUPERFAMILY	PIRSF015812:Caenorhabditis elegans hypothetical protein F57E7.1	3	0.122649	0.0379074	C33G8.4, F20A1.1, F20A1.10	533	3	4541	8.5197	0.999997	0.595615	40.7516
PIR_SUPERFAMILY	PIRSF016363:hypothetical protein, Caenorhabditis elegans C24D10.2 type	3	0.122649	0.0379074	F11G11.4, C24D10.2, C27D6.3	533	3	4541	8.5197	0.999997	0.595615	40.7516
GOTERM_BP_5	GO:0006508~proteolysis	58	2.37122	0.038798	ELC-1, H12I13.1, SKR-10, ADT-1, Y19D10B.6, DPF-2, C18H2.4, F42G10.1, SKR-12, SKR-13, WRT-4, WRT-6, R03G8.4, NAS-38, CKI-1, T28A11.20, C17B7.8, NAS-30, F44F1.3, K02F6.1, ZMP-1, Y18H1A.9, CLP-3, GLT-5, W08F4.10, NAS-28, DCT-10, C08F11.7, T19D2.1, NAS-25, C26B9.5, T25D3.3, F28E10.5, F49B2.6, F25E5.7, R05H10.7, TRY-8, TRY-9, CLP-6, TRY-7, F54G2.2, SKR-5, T11F8.4, SKR-9, T07F10.1, NAS-14, ZK430.5, C17…	589	520	6749	1.27805	1	0.780867	42.6635
GOTERM_MF_FAT	GO:0030246~carbohydrate binding	29	1.18561	0.0398309	LEC-8, UGT-41, CLEC-82, CLEC-83, UGT-46, CLEC-160, UGT-25, CLEC-86, CLEC-166, UGT-40, CLEC-169, Y73F4A.2, LEC-10, CLEC-117, AMAN-3, CLEC-173, UGT-11, UGT-31, UGT-30, UGT-2, UGT-13, UGT-36, CLEC-72, CLEC-73, UGT-14, CLEC-52, CLEC-79, CLEC-53, UGT-8	756	177	6686	1.449	1	0.523738	42.8432
GOTERM_CC_1	GO:0005576~extracellular region	43	1.75797	0.0416162	SCL-25, SCL-23, SCL-24, SCL-21, DAF-7, NAS-28, C06A8.6, NAS-25, T19D2.1, FLP-3, INS-7, FLP-1, INS-33, CLEC-160, CAH-5, C44B12.6, SCL-6, PXN-1, INS-5, C03G6.5, SCL-3, INS-6, SCL-15, WRT-4, WRT-6, SCL-17, Y73F4A.2, T01D3.3, NAS-14, INS-37, INS-19, Y45F10C.4, C08F11.12, FLP-13, NAS-38, D2062.1, ZC116.3, ZK262.3, NLP-28, VAP-1, ZMP-1, F32A5.4, COL-14	999	311	9662	1.33724	0.373481	0.373481	23.2638
INTERPRO	IPR013525:ABC-2 type transporter	4	0.163532	0.0450385	WHT-4, WHT-5, WHT-3, WHT-6	1456	8	13633	4.68166	1	0.530612	50.914
SP_PIR_KEYWORDS	kinase	43	1.75797	0.0452806	R11E3.1, K06H7.8, C35E7.10, KIN-26, C18H7.4, Y4C6A.1, F01D4.3, Y69E1A.3, C25A8.5, VER-1, Y52D5A.2, C03C10.2, C55C3.4, F26E4.5, CKB-3, Y116A8C.38, KIN-5, FRK-1, K09B11.5, F09A5.2, T06C10.3, W01B6.5, ZC581.7, F57B9.8, NEKL-1, OLD-1, TPA-1, D1044.1, T25B9.4, T25B9.5, ZK622.1, C34F11.5, CMK-1, SPE-8, KIN-21, TTN-1, KIN-24, F59A3.8, ZK507.3, F22B3.8, Y116A8C.24, T21G5.1, Y43C5B.2	2374	268	19674	1.32968	0.999875	0.593005	43.8924
UP_SEQ_FEATURE	metal ion-binding site:Iron	5	0.204415	0.0454218	C27B7.6, C23G10.1, CAT-2, LET-268, C06A1.3	239	19	3249	3.57741	1	0.975597	49.9663
INTERPRO	IPR015897:CHK kinase-like	7	0.286182	0.052059	D1044.1, H06H21.8, F59B1.10, C18B10.6, F49C12.7, F20D6.5, T16G1.4	1456	26	13633	2.52089	1	0.57707	56.1999
KEGG_PATHWAY	cel04310:Wnt signaling pathway	6	0.245298	0.05253	SKR-10, SKR-5, SKR-9, SKR-12, SKR-13, EGL-8	54	60	1534	2.84074	0.962804	0.666191	41.8805
INTERPRO	IPR002110:Ankyrin	16	0.654129	0.0532368	F26D2.10, F36D3.5, K09D9.11, F56H1.3, C01G10.1, C18H2.3, C18H2.5, T08G3.7, C18H2.4, OCR-2, C38D9.5, SPE-41, F37A4.4, Y67A10A.3, C18H2.1, F40E12.2	1456	90	13633	1.66459	1	0.578505	57.0327
GOTERM_BP_FAT	GO:0007635~chemosensory behavior	6	0.245298	0.0547761	UNC-119, ODR-4, TBX-2, CHE-3, ODR-1, DYF-2	724	23	7838	2.82417	1	0.957348	57.7863
GOTERM_MF_FAT	GO:0008138~protein tyrosine/serine/threonine phosphatase activity	7	0.286182	0.0552089	F54F12.1, T20B6.1, Y69A2AR.19, H06I04.5, T28F4.3, F47B3.7, F26A3.4	756	25	6686	2.4763	1	0.62734	54.2313
GOTERM_MF_3	GO:0008233~peptidase activity	50	2.04415	0.0554801	SRP-6, ADT-1, Y19D10B.6, DPF-2, CPI-2, C18H2.4, F42G10.1, WRT-4, WRT-6, R03G8.4, NAS-38, T28A11.20, NAS-30, C17B7.8, F44F1.3, K02F6.1, ZMP-1, Y18H1A.9, CLP-3, W08F4.10, GLT-5, NAS-28, DCT-10, C08F11.7, NAS-25, T19D2.1, C26B9.5, T25D3.3, F28E10.5, F49B2.6, F25E5.7, R05H10.7, TRY-8, TRY-9, CLP-6, TRY-7, F54G2.2, T11F8.4, T07F10.1, NAS-14, ZK430.5, C17B7.10, AEX-5, BTB-13, CSP-2, K08E4.7, CSP-1, CPT…	685	414	7243	1.27702	0.99124	0.446885	45.7319
GOTERM_BP_3	GO:0007635~chemosensory behavior	6	0.245298	0.055738	UNC-119, ODR-4, TBX-2, CHE-3, ODR-1, DYF-2	734	23	7908	2.81057	1	0.915779	53.5673
INTERPRO	IPR000152:EGF-type aspartate/asparagine hydroxylation conserved site	8	0.327065	0.055867	F19C6.3, Y46G5A.29, NLR-1, ZC116.3, HIM-4, LRP-1, SLT-1, MUA-3	1456	33	13633	2.2699	1	0.589783	58.8394
SP_PIR_KEYWORDS	cell projection	6	0.245298	0.0567872	MSP-56, MSP-31, MSP-57, MSP-45, MSP-33, MSP-59, MSP-53, MSP-36, MSP-19, MSP-55, MSP-38, MSP-81, MSP-113, MSP-49, F58A6.9, MSP-10, MSP-79, MSP-78, MSP-64, MSP-77, MSP-63, MSP-76, MSP-3, MSP-65, MSP-51, MSP-50, MSP-142, CHE-3, MSP-40, MSP-152	2374	18	19674	2.76243	0.999988	0.643379	51.7667
GOTERM_MF_4	GO:0016298~lipase activity	11	0.449714	0.0571429	Y46H3A.4, Y49E10.18, F28A10.7, Y51A2B.4, ZK262.3, T28C6.5, M110.7, EGL-8, F25A2.1, C40H1.7, C31H1.5	632	56	6132	1.90585	0.997376	0.628603	48.0202
INTERPRO	IPR013098:Immunoglobulin I-set	9	0.367948	0.0575284	VER-1, TTN-1, F21C10.7, HIM-4, ZIG-2, UNC-73, PXN-2, PXN-1, SYG-2	1456	40	13633	2.10675	1	0.594108	59.9436
GOTERM_CC_4	GO:0009288~flagellin-based flagellum	3	0.122649	0.0585877	TNC-2, F40G9.9, H06I04.5	940	4	8829	7.04441	0.997612	0.634407	48.8349
GOTERM_CC_5	GO:0009288~flagellin-based flagellum	3	0.122649	0.0586762	TNC-2, F40G9.9, H06I04.5	938	4	8803	7.03865	0.997331	0.772696	48.7576
SMART	SM00343:ZnF_C2HC	9	0.367948	0.0595054	F54G2.2, F49F1.8, C38D9.2, F15D4.5, ZC15.1, DCT-10, K02F6.1, K08D12.3, Y43F4A.3	666	36	5537	2.07845	0.999972	0.582816	52.7252
INTERPRO	IPR012877:Uncharacterised kinase D1044.1	7	0.286182	0.0611291	D1044.1, H06H21.8, F59B1.10, C18B10.6, F49C12.7, F20D6.5, T16G1.4	1456	27	13633	2.42753	1	0.610457	62.2426
GOTERM_BP_FAT	GO:0048610~reproductive cellular process	13	0.53148	0.0618227	Y54E2A.9, T02H6.9, SPE-4, T02H6.7, R105.1, Y57G11A.2, Y39A3A.3, Y39F10C.1, SPE-15, SPE-8, Y37E11AL.4, C08G5.3, SPE-10	724	80	7838	1.75922	1	0.964402	62.3555
INTERPRO	IPR002076:GNS1/SUR4 membrane protein	4	0.163532	0.0623206	ELO-7, ELO-8, ELO-2, ELO-4	1456	9	13633	4.16148	1	0.611277	62.9758
GOTERM_BP_3	GO:0048610~reproductive cellular process	13	0.53148	0.0636874	Y54E2A.9, T02H6.9, SPE-4, T02H6.7, R105.1, Y57G11A.2, Y39A3A.3, Y39F10C.1, SPE-15, SPE-8, Y37E11AL.4, C08G5.3, SPE-10	734	80	7908	1.75075	1	0.916605	58.5323
UP_SEQ_FEATURE	metal ion-binding site:Manganese	4	0.163532	0.0641913	C27B7.6, C23G10.1, SOD-3, C06A1.3	239	13	3249	4.18281	1	0.990999	62.779
UP_SEQ_FEATURE	disulfide bond	23	0.940311	0.064441	CDH-4, DAF-7, NAS-28, LRP-1, NAS-14, NAS-25, F26C11.1, MUA-3, NAS-38, INS-7, DPF-2, SPE-9, CLEC-160, IFE-5, ZC116.3, SOL-1, NAS-30, TRXR-2, ZK262.3, F32A5.4, PXN-1, INS-6, TRX-2	239	215	3249	1.45426	1	0.985827	62.9267
GOTERM_MF_FAT	GO:0000166~nucleotide binding	172	7.03189	0.0650915	K06H7.8, VY10G11R.1, F23F1.5, C18H7.4, ZK666.8, F26A1.3, TAG-191, R10D12.10, CPB-2, H12I13.1, F01D4.3, C03C10.2, W09C3.1, C14A4.13, W06F12.3, C27D8.1, F07F6.1, ABT-5, F54H5.2, TRXR-2, ABT-1, F26E4.5, FBXB-54, ZK596.2, W03A5.1, CKB-3, C09B9.4, ZC581.7, F57B9.8, OLD-1, R13H9.6, TPA-1, R13H9.5, M7.7, ZC581.2, W04C9.5, F26A1.4, KIN-21, KIN-24, F22B3.8, C27D6.11, MEC-7, T19D12.5, B0207.7, C56C10.6, ZC…	756	1369	6686	1.11114	1	0.672634	60.3975
UP_SEQ_FEATURE	domain:EGF-like 7	3	0.122649	0.065855	ZC116.3, LRP-1, MUA-3	239	6	3249	6.79707	1	0.980887	63.7526
GOTERM_BP_4	GO:0006836~neurotransmitter transport	8	0.327065	0.0677291	SNN-1, MOD-5, DYB-1, SNF-10, SNF-8, SNF-5, SNF-2, F56F4.3	703	40	7683	2.18578	1	0.953661	62.8837
GOTERM_BP_2	GO:0048610~reproductive cellular process	13	0.53148	0.0677773	Y54E2A.9, T02H6.9, SPE-4, T02H6.7, R105.1, Y57G11A.2, Y39A3A.3, Y39F10C.1, SPE-15, SPE-8, Y37E11AL.4, C08G5.3, SPE-10	761	80	8116	1.73305	0.999747	0.809162	55.211
PIR_SUPERFAMILY	PIRSF016362:hypothetical protein, Caenorhabditis elegans B0546.5 type	3	0.122649	0.0699745	B0546.5, ZK757.1, Y69H2.1	533	4	4541	6.38977	1	0.795314	62.5656
PIR_SUPERFAMILY	PIRSF016364:Caenorhabditis elegans hypothetical protein K06H6.2	3	0.122649	0.0699745	Y40H7A.4, Y39F10A.3, Y55F3AM.11	533	4	4541	6.38977	1	0.795314	62.5656
GOTERM_CC_FAT	GO:0009288~flagellin-based flagellum	3	0.122649	0.0700177	TNC-2, F40G9.9, H06I04.5	928	4	7912	6.3944	0.999908	0.787451	56.9587
GOTERM_BP_FAT	GO:0006836~neurotransmitter transport	8	0.327065	0.0705744	SNN-1, MOD-5, DYB-1, SNF-10, SNF-8, SNF-5, SNF-2, F56F4.3	724	40	7838	2.16519	1	0.972298	67.3872
GOTERM_BP_3	GO:0006836~neurotransmitter transport	8	0.327065	0.0720631	SNN-1, MOD-5, DYB-1, SNF-10, SNF-8, SNF-5, SNF-2, F56F4.3	734	40	7908	2.15477	1	0.918705	63.2287
GOTERM_MF_3	GO:0030414~peptidase inhibitor activity	14	0.572363	0.0737248	Y57G11C.5, Y73F8A.20, SRP-6, R01H2.4, T01D3.3, C02F12.5, Y55F3BR.2, C31H1.2, CPI-2, F44G3.7, Y49G5A.1, SPON-1, F29G6.1, TAG-290	685	89	7243	1.66328	0.998265	0.506521	55.9617
KEGG_PATHWAY	cel00982:Drug metabolism	4	0.163532	0.0755865	UGT-46, GST-4, GST-2, FMO-5	54	29	1534	3.91826	0.991724	0.69838	54.635
INTERPRO	IPR005071:Protein of unknown function DUF274	6	0.245298	0.0777917	DOD-19, F39E9.1, DOD-20, Y46D2A.2, C34H4.1, Y46D2A.1	1456	22	13633	2.55363	1	0.689225	71.3636
INTERPRO	IPR006588:Protein of unknown function PAW	6	0.245298	0.0777917	F35F10.1, F35F10.4, C04E12.2, T20D4.3, C17B7.5, C04E12.5, C04E12.4	1456	22	13633	2.55363	1	0.689225	71.3636
SP_PIR_KEYWORDS	hydrolase	79	3.22976	0.07901	Y71G12B.31, Y71G12B.30, CRN-6, ZK484.7, W03F11.4, C06A1.3, ADT-1, DPF-2, F23B12.1, T22C1.8, F52H3.6, Y40H4A.2, WRT-4, Y54G2A.24, WRT-6, F36H1.3, T20B6.1, Y113G7C.1, W03D8.2, F26A3.4, NAS-38, K07C11.7, F20H11.4, C34D4.2, PAF-1, C17H12.3, NAS-30, ZK262.3, ZMP-1, ACE-3, F26B1.5, C27B7.6, C15H7.3, T16G12.7, Y22D7AR.12, NAS-28, R08C7.8, M04G7.2, T19D2.1, NAS-25, ZC477.2, GSP-3, C33H5.16, F09C8.1, F26C…	2374	553	19674	1.1839	1	0.735685	64.1732
INTERPRO	IPR004046:Glutathione S-transferase, C-terminal	10	0.408831	0.0800461	GST-15, GST-41, GST-14, GST-4, GST-19, GST-2, GST-25, GST-24, GST-33, GST-31	1456	50	13633	1.87266	1	0.693825	72.4257
INTERPRO	IPR006209:EGF	10	0.408831	0.0800461	CDH-4, F19C6.3, SPE-9, Y46G5A.29, NLR-1, ZC116.3, LRP-1, SLT-1, MUA-3, Y38C1AA.9	1456	50	13633	1.87266	1	0.693825	72.4257
INTERPRO	IPR018097:EGF-like calcium-binding, conserved site	7	0.286182	0.0818937	F19C6.3, Y46G5A.29, ZC116.3, HIM-4, LRP-1, SLT-1, MUA-3	1456	29	13633	2.26011	1	0.696361	73.2685
INTERPRO	IPR013078:Phosphoglycerate mutase	4	0.163532	0.0821723	F53B6.7, F09C12.8, C52E4.7, F55A11.11	1456	10	13633	3.74533	1	0.691657	73.3935
SMART	SM00587:CHK	7	0.286182	0.0829727	D1044.1, H06H21.8, F59B1.10, C18B10.6, F49C12.7, F20D6.5, T16G1.4	666	26	5537	2.23833	1	0.679976	65.2772
UP_SEQ_FEATURE	domain:EGF-like 6	3	0.122649	0.0878411	ZC116.3, LRP-1, MUA-3	239	7	3249	5.82606	1	0.992523	74.5791
GOTERM_MF_FAT	GO:0015370~solute:sodium symporter activity	7	0.286182	0.0881525	MOD-5, SNF-10, GLT-5, SNF-8, SNF-5, SNF-2, F56F4.3	756	28	6686	2.21098	1	0.768802	71.9168
GOTERM_MF_3	GO:0020037~heme binding	20	0.817661	0.0881602	DAF-9, VEM-1, CYP-34A4, CYP-13B1, CYP-25A2, CYP-34A10, CYP-25A1, CYP-34A6, CYP-33C5, CYC-2.2, CYP-33D3, GLB-18, GLB-30, CYP-33C2, GLB-8, CYP-29A4, PXN-2, PXN-1, CYP-14A3, CYP-33C9	685	145	7243	1.45844	0.999529	0.535138	62.7796
GOTERM_BP_3	GO:0006629~lipid metabolic process	37	1.51267	0.0882922	Y46H3A.4, F28A10.7, T09B9.3, F09C8.1, F55C5.2, F54C8.1, C31H1.5, UGT-41, B0524.2, Y51A2B.4, UGT-46, UGT-25, TRXR-2, UGT-40, F25A2.1, C40H1.7, T28C6.5, EGL-8, M110.7, Y49E10.18, UGT-11, UGT-31, UGT-30, PAF-1, UGT-2, UGT-13, UGT-36, ZC116.3, UGT-14, HSD-2, ZK262.3, ZK1251.3, F13D12.9, ELO-2, GALE-1, F25C8.1, UGT-8	734	309	7908	1.29007	1	0.938675	70.9593
GOTERM_BP_FAT	GO:0006508~proteolysis	58	2.37122	0.0893315	ELC-1, H12I13.1, SKR-10, ADT-1, Y19D10B.6, DPF-2, C18H2.4, F42G10.1, SKR-12, SKR-13, WRT-4, WRT-6, R03G8.4, NAS-38, CKI-1, T28A11.20, C17B7.8, NAS-30, F44F1.3, K02F6.1, ZMP-1, Y18H1A.9, CLP-3, GLT-5, W08F4.10, NAS-28, DCT-10, C08F11.7, T19D2.1, NAS-25, C26B9.5, T25D3.3, F28E10.5, F49B2.6, F25E5.7, R05H10.7, TRY-8, TRY-9, CLP-6, TRY-7, F54G2.2, SKR-5, T11F8.4, SKR-9, T07F10.1, NAS-14, ZK430.5, C17…	724	520	7838	1.20751	1	0.98664	76.1309
GOTERM_MF_2	GO:0004857~enzyme inhibitor activity	15	0.613246	0.0909826	Y57G11C.5, Y73F8A.20, SRP-6, R01H2.4, T01D3.3, C02F12.5, CKI-1, Y55F3BR.2, C31H1.2, CPI-2, F44G3.7, Y49G5A.1, SPON-1, F29G6.1, TAG-290	892	95	8884	1.57257	0.983457	0.366032	58.8402
INTERPRO	IPR001232:SKP1 component	6	0.245298	0.0910629	SKR-10, SKR-5, ELC-1, SKR-9, SKR-12, SKR-13	1456	23	13633	2.44261	1	0.724446	77.1065
INTERPRO	IPR002921:Lipase, class 3	6	0.245298	0.0910629	Y46H3A.4, Y49E10.18, Y51A2B.4, ZK262.3, F25A2.1, C40H1.7	1456	23	13633	2.44261	1	0.724446	77.1065
INTERPRO	IPR003235:Nematode insulin-related peptide, beta type	6	0.245298	0.0910629	INS-7, INS-33, INS-19, INS-37, INS-5, INS-6	1456	23	13633	2.44261	1	0.724446	77.1065
GOTERM_BP_5	GO:0009712~catechol metabolic process	6	0.245298	0.091122	R05D8.7, R05D8.9, CAT-2, HDL-1, DHS-4, F26D2.15	589	28	6749	2.45537	1	0.965264	73.8949
GOTERM_BP_FAT	GO:0006800~oxygen and reactive oxygen species metabolic process	4	0.163532	0.0916782	SOD-3, T01D3.3, SOD-5, PXN-1	724	12	7838	3.60866	1	0.984826	77.0554
INTERPRO	IPR017973:Cytochrome P450, C-terminal region	13	0.53148	0.0919001	DAF-9, CYP-34A4, CYP-13B1, CYP-25A2, CYP-34A10, CYP-25A1, CYP-34A6, CYP-33C5, CYP-33D3, CYP-33C2, CYP-29A4, CYP-33C9, CYP-14A3	1456	74	13633	1.64491	1	0.722173	77.4299
GOTERM_BP_3	GO:0006800~oxygen and reactive oxygen species metabolic process	4	0.163532	0.0927353	SOD-3, T01D3.3, SOD-5, PXN-1	734	12	7908	3.59128	1	0.93088	72.7964
COG_ONTOLOGY	Defense mechanisms	6	0.245298	0.0930857	PGP-13, PGP-7, PGP-14, ABT-5, PGP-8, CFT-1	93	30	1118	2.4043	0.913073	0.457013	54.7388
INTERPRO	IPR001881:EGF-like calcium-binding	7	0.286182	0.0935737	F19C6.3, Y46G5A.29, ZC116.3, HIM-4, LRP-1, SLT-1, MUA-3	1456	30	13633	2.18478	1	0.723313	78.0638
GOTERM_MF_FAT	GO:0016298~lipase activity	11	0.449714	0.0941733	Y46H3A.4, Y49E10.18, F28A10.7, Y51A2B.4, ZK262.3, T28C6.5, M110.7, EGL-8, F25A2.1, C40H1.7, C31H1.5	756	56	6686	1.7372	1	0.777808	74.3639
INTERPRO	IPR002035:von Willebrand factor, type A	10	0.408831	0.0973702	CLEC-66, CLEC-65, C18H7.1, CLEC-160, CLEC-60, HIM-4, DPY-1, CUTL-23, MUA-3, T19D12.4	1456	52	13633	1.80064	1	0.732637	79.4403
GOTERM_BP_4	GO:0006801~superoxide metabolic process	3	0.122649	0.0976365	SOD-3, T01D3.3, SOD-5	703	6	7683	5.46444	1	0.983275	76.5877
GOTERM_CC_2	GO:0043228~non-membrane-bounded organelle	65	2.6574	0.0992072	F38H4.6, MSP-31, Y48B6A.5, MSP-33, MSP-36, Y53C10A.15, MSP-38, MSP-113, Y38F2AR.10, Y73B6A.1, C54E10.1, HIS-59, C15H11.1, SPE-15, F54H5.3, TBA-8, MSP-3, C10H11.7, C35E7.9, TBB-6, MSP-40, F13A7.1, MSP-152, IFP-1, T22B3.3, C23H4.6, TNC-2, PTL-1, W03D8.5, Y113G7C.1, Y53F4B.19, M03E7.1, DLC-6, SPE-26, FRM-8, F21H7.5, MSP-142, F42A9.7, F55D12.6, MEC-7, BBS-5, MSP-56, F57A10.2, MSP-57, MSP-59, ZC155.2,…	967	535	9458	1.18832	0.968186	0.577667	59.8262
GOTERM_CC_3	GO:0043232~intracellular non-membrane-bounded organelle	65	2.6574	0.0992072	F38H4.6, MSP-31, Y48B6A.5, MSP-33, MSP-36, Y53C10A.15, MSP-38, MSP-113, Y38F2AR.10, Y73B6A.1, C54E10.1, HIS-59, C15H11.1, SPE-15, F54H5.3, TBA-8, MSP-3, C10H11.7, C35E7.9, TBB-6, MSP-40, F13A7.1, MSP-152, IFP-1, T22B3.3, C23H4.6, TNC-2, PTL-1, W03D8.5, Y113G7C.1, Y53F4B.19, M03E7.1, DLC-6, SPE-26, FRM-8, F21H7.5, MSP-142, F42A9.7, F55D12.6, MEC-7, BBS-5, MSP-56, F57A10.2, MSP-57, MSP-59, ZC155.2,…	967	535	9458	1.18832	0.999766	0.751688	67.0686
GOTERM_BP_FAT	GO:0006801~superoxide metabolic process	3	0.122649	0.0992726	SOD-3, T01D3.3, SOD-5	724	6	7838	5.41298	1	0.986622	79.823
INTERPRO	IPR002401:Cytochrome P450, E-class, group I	13	0.53148	0.0993386	DAF-9, CYP-34A4, CYP-13B1, CYP-25A2, CYP-34A10, CYP-25A1, CYP-34A6, CYP-33C5, CYP-33D3, CYP-33C2, CYP-29A4, CYP-33C9, CYP-14A3	1456	75	13633	1.62298	1	0.734687	80.1219
INTERPRO	IPR017972:Cytochrome P450, conserved site	13	0.53148	0.0993386	DAF-9, CYP-34A4, CYP-13B1, CYP-25A2, CYP-34A10, CYP-25A1, CYP-34A6, CYP-33C5, CYP-33D3, CYP-33C2, CYP-29A4, CYP-33C9, CYP-14A3	1456	75	13633	1.62298	1	0.734687	80.1219
INTERPRO	IPR002413:Ves allergen	5	0.204415	0.0996322	SCL-15, SCL-23, SCL-6, VAP-1, SCL-3	1456	17	13633	2.75392	1	0.730481	80.2217

## Sheet: AWK107.g3_vs_WT
Category	Term	Count	%	PValue	Genes	List Total	Pop Hits	Pop Total	Fold Enrichment	Bonferroni	Benjamini	FDR
GOTERM_BP_4	GO:0006796~phosphate metabolic process	166	7.8785	1.26749e-50	R06B10.1, K06H7.8, C18H7.4, ZK666.8, F26A1.3, TAG-191, R10D12.10, ZK484.7, F01D4.3, C03C10.2, W09C3.1, C14A4.13, W06F12.3, C27D8.1, F54H5.2, T22C1.8, W03F8.2, F26E4.5, ZK596.2, W03A5.1, ZK809.1, C09B9.4, C07E3.4, ZC581.7, F42C5.5, F57B9.8, F55H12.5, OLD-1, C02B10.6, R13H9.6, R13H9.5, M7.7, ZC581.2, F20H11.4, F26A1.4, KIN-21, KIN-24, Y80D3A.8, F22B3.8, Y39B6A.30, C27D6.11, T19D12.5, B0207.7, C56C1…	565	665	7683	3.39445	4.57564e-48	4.57564e-48	1.74149e-47
GOTERM_BP_FAT	GO:0006796~phosphate metabolic process	166	7.8785	7.96383e-50	R06B10.1, K06H7.8, C18H7.4, ZK666.8, F26A1.3, TAG-191, R10D12.10, ZK484.7, F01D4.3, C03C10.2, W09C3.1, C14A4.13, W06F12.3, C27D8.1, F54H5.2, T22C1.8, W03F8.2, F26E4.5, ZK596.2, W03A5.1, ZK809.1, C09B9.4, C07E3.4, ZC581.7, F42C5.5, F57B9.8, F55H12.5, OLD-1, C02B10.6, R13H9.6, R13H9.5, M7.7, ZC581.2, F20H11.4, F26A1.4, KIN-21, KIN-24, Y80D3A.8, F22B3.8, Y39B6A.30, C27D6.11, T19D12.5, B0207.7, C56C1…	582	665	7838	3.36178	4.98535e-47	4.98535e-47	1.18302e-46
GOTERM_BP_FAT	GO:0006793~phosphorus metabolic process	166	7.8785	7.96383e-50	R06B10.1, K06H7.8, C18H7.4, ZK666.8, F26A1.3, TAG-191, R10D12.10, ZK484.7, F01D4.3, C03C10.2, W09C3.1, C14A4.13, W06F12.3, C27D8.1, F54H5.2, T22C1.8, W03F8.2, F26E4.5, ZK596.2, W03A5.1, ZK809.1, C09B9.4, C07E3.4, ZC581.7, F42C5.5, F57B9.8, F55H12.5, OLD-1, C02B10.6, R13H9.6, R13H9.5, M7.7, ZC581.2, F20H11.4, F26A1.4, KIN-21, KIN-24, Y80D3A.8, F22B3.8, Y39B6A.30, C27D6.11, T19D12.5, B0207.7, C56C1…	582	665	7838	3.36178	4.98535e-47	4.98535e-47	1.18302e-46
GOTERM_BP_3	GO:0006793~phosphorus metabolic process	166	7.8785	2.4771e-49	R06B10.1, K06H7.8, C18H7.4, ZK666.8, F26A1.3, TAG-191, R10D12.10, ZK484.7, F01D4.3, C03C10.2, W09C3.1, C14A4.13, W06F12.3, C27D8.1, F54H5.2, T22C1.8, W03F8.2, F26E4.5, ZK596.2, W03A5.1, ZK809.1, C09B9.4, C07E3.4, ZC581.7, F42C5.5, F57B9.8, F55H12.5, OLD-1, C02B10.6, R13H9.6, R13H9.5, M7.7, ZC581.2, F20H11.4, F26A1.4, KIN-21, KIN-24, Y80D3A.8, F22B3.8, Y39B6A.30, C27D6.11, T19D12.5, B0207.7, C56C1…	591	665	7908	3.34015	6.51476e-47	6.51476e-47	3.24364e-46
GOTERM_BP_5	GO:0006464~protein modification process	164	7.78358	3.4041e-48	R06B10.1, K06H7.8, C18H7.4, ZK666.8, F26A1.3, TAG-191, R10D12.10, ZK484.7, F01D4.3, C03C10.2, W09C3.1, C14A4.13, W06F12.3, C27D8.1, UBC-24, F54H5.2, T22C1.8, W03F8.2, F26E4.5, ZK596.2, W03A5.1, ZK809.1, C09B9.4, C07E3.4, ZC581.7, F42C5.5, F57B9.8, F55H12.5, OLD-1, C02B10.6, R13H9.6, R13H9.5, M7.7, ZC581.2, F20H11.4, F26A1.4, KIN-21, KIN-24, Y80D3A.8, F22B3.8, Y39B6A.30, C27D6.11, T19D12.5, B0207.…	480	711	6749	3.24319	1.15739e-45	1.15739e-45	4.63565e-45
GOTERM_BP_4	GO:0043412~biopolymer modification	164	7.78358	1.76611e-42	R06B10.1, K06H7.8, C18H7.4, ZK666.8, F26A1.3, TAG-191, R10D12.10, ZK484.7, F01D4.3, C03C10.2, W09C3.1, C14A4.13, W06F12.3, C27D8.1, UBC-24, F54H5.2, T22C1.8, W03F8.2, F26E4.5, ZK596.2, W03A5.1, ZK809.1, C09B9.4, C07E3.4, ZC581.7, F42C5.5, F57B9.8, F55H12.5, OLD-1, C02B10.6, R13H9.6, R13H9.5, M7.7, ZC581.2, F20H11.4, F26A1.4, KIN-21, KIN-24, Y80D3A.8, F22B3.8, Y39B6A.30, C27D6.11, T19D12.5, B0207.…	565	740	7683	3.01366	6.37567e-40	3.18783e-40	2.42659e-39
GOTERM_CC_3	GO:0031224~intrinsic to membrane	734	34.8363	5.29952e-37	Y37H2A.14, C06G4.4, T24C4.4, F56A11.6, Y105C5B.17, SRH-70, F58F12.2, F32B4.2, GTL-2, COL-97, C31H1.2, T05E12.3, COL-95, TSP-5, DPF-2, TSP-4, E04F6.4, ABT-5, UGT-63, T22C1.9, C38D9.5, ABT-1, T19A6.4, TSP-3, CDH-10, C45B2.2, C09B9.7, W01D2.3, C09B9.2, T19D7.7, C45B2.1, M03E7.3, COL-85, F56D6.14, Y69A2AR.23, COL-88, UGT-54, MEC-4, F56D6.13, F56D6.12, COL-81, F49D11.3, Y73F8A.35, F08A8.8, DAF-9, T22F…	837	6608	9458	1.25516	3.76266e-35	3.76266e-35	5.50046e-34
GOTERM_CC_2	GO:0044425~membrane part	738	35.0261	4.40028e-34	Y37H2A.14, C06G4.4, T24C4.4, F56A11.6, Y105C5B.17, SRH-70, F58F12.2, F32B4.2, GTL-2, COL-97, C31H1.2, T05E12.3, COL-95, TSP-5, DPF-2, TSP-4, E04F6.4, ABT-5, UGT-63, T22C1.9, C38D9.5, ABT-1, T19A6.4, TSP-3, CDH-10, C45B2.2, C09B9.7, W01D2.3, C09B9.2, T19D7.7, C45B2.1, M03E7.3, CYC-2.2, COL-85, F56D6.14, Y69A2AR.23, COL-88, UGT-54, MEC-4, F56D6.13, F56D6.12, COL-81, F49D11.3, Y73F8A.35, F08A8.8, DA…	837	6752	9458	1.23509	1.36409e-32	1.36409e-32	3.78022e-31
GOTERM_CC_3	GO:0044425~membrane part	738	35.0261	4.40028e-34	Y37H2A.14, C06G4.4, T24C4.4, F56A11.6, Y105C5B.17, SRH-70, F58F12.2, F32B4.2, GTL-2, COL-97, C31H1.2, T05E12.3, COL-95, TSP-5, DPF-2, TSP-4, E04F6.4, ABT-5, UGT-63, T22C1.9, C38D9.5, ABT-1, T19A6.4, TSP-3, CDH-10, C45B2.2, C09B9.7, W01D2.3, C09B9.2, T19D7.7, C45B2.1, M03E7.3, CYC-2.2, COL-85, F56D6.14, Y69A2AR.23, COL-88, UGT-54, MEC-4, F56D6.13, F56D6.12, COL-81, F49D11.3, Y73F8A.35, F08A8.8, DA…	837	6752	9458	1.23509	3.1242e-32	1.5621e-32	4.56713e-31
GOTERM_CC_2	GO:0016020~membrane	743	35.2634	4.96856e-31	Y37H2A.14, C06G4.4, T24C4.4, F56A11.6, Y105C5B.17, SRH-70, F58F12.2, F32B4.2, GTL-2, COL-97, C31H1.2, T05E12.3, COL-95, TSP-5, DPF-2, TSP-4, E04F6.4, ABT-5, UGT-63, GPN-1, T22C1.9, C38D9.5, ABT-1, T19A6.4, TSP-3, CDH-10, C45B2.2, C09B9.7, W01D2.3, C09B9.2, T19D7.7, C45B2.1, M03E7.3, CYC-2.2, COL-85, F56D6.14, Y69A2AR.23, COL-88, UGT-54, MEC-4, F56D6.13, F56D6.12, COL-81, F49D11.3, Y73F8A.35, F08A…	837	6918	9458	1.21362	1.54025e-29	7.70127e-30	4.26842e-28
GOTERM_CC_3	GO:0016020~membrane	743	35.2634	4.96856e-31	Y37H2A.14, C06G4.4, T24C4.4, F56A11.6, Y105C5B.17, SRH-70, F58F12.2, F32B4.2, GTL-2, COL-97, C31H1.2, T05E12.3, COL-95, TSP-5, DPF-2, TSP-4, E04F6.4, ABT-5, UGT-63, GPN-1, T22C1.9, C38D9.5, ABT-1, T19A6.4, TSP-3, CDH-10, C45B2.2, C09B9.7, W01D2.3, C09B9.2, T19D7.7, C45B2.1, M03E7.3, CYC-2.2, COL-85, F56D6.14, Y69A2AR.23, COL-88, UGT-54, MEC-4, F56D6.13, F56D6.12, COL-81, F49D11.3, Y73F8A.35, F08A…	837	6918	9458	1.21362	3.52768e-29	1.17589e-29	5.15696e-28
GOTERM_BP_FAT	GO:0006468~protein amino acid phosphorylation	108	5.12577	7.73002e-31	K06H7.8, C18H7.4, F26A1.3, ZK666.8, TAG-191, R10D12.10, F01D4.3, W09C3.1, C03C10.2, C14A4.13, W06F12.3, C27D8.1, F54H5.2, W03F8.2, F26E4.5, ZK596.2, W03A5.1, C09B9.4, ZC581.7, F57B9.8, OLD-1, R13H9.6, R13H9.5, ZC581.2, M7.7, F26A1.4, KIN-21, KIN-24, F22B3.8, C27D6.11, T19D12.5, B0207.7, C56C10.6, GCY-22, Y47G6A.13, Y69E1A.3, H05L14.1, F21F3.2, KIN-5, T06C10.3, Y65B4A.9, GCY-9, F33D11.7, T25B9.4, …	582	437	7838	3.32832	4.83899e-28	2.4195e-28	1.14829e-27
GOTERM_MF_FAT	GO:0004721~phosphoprotein phosphatase activity	73	3.46464	2.68413e-30	R06B10.1, Y71G12B.30, F38H4.4, ZK484.7, W03F11.4, C06A1.3, F23B12.1, T22C1.8, Y116A8C.37, F52H3.6, C50F2.5, ZK809.1, W01B6.6, Y57G11C.6, Y54G2A.24, F36H1.3, T20B6.1, C07E3.4, F42C5.5, Y113G7C.1, F55H12.5, C02B10.6, F20H11.4, C34D4.2, C17H12.3, C17H12.5, Y80D3A.8, Y39B6A.30, C27B7.6, M05B5.1, C15H7.3, T16G12.7, Y22D7AR.12, C48B6.4, M04G7.2, R09E10.9, GSP-3, C33H5.16, GSP-4, CDC-25.4, Y69E1A.4, R08…	632	173	6686	4.46402	8.75025e-28	8.75025e-28	3.63224e-27
GOTERM_CC_5	GO:0016021~integral to membrane	734	34.8363	3.23386e-30	Y37H2A.14, C06G4.4, T24C4.4, F56A11.6, Y105C5B.17, SRH-70, F58F12.2, F32B4.2, GTL-2, COL-97, C31H1.2, T05E12.3, COL-95, TSP-5, DPF-2, TSP-4, E04F6.4, ABT-5, UGT-63, T22C1.9, C38D9.5, ABT-1, T19A6.4, TSP-3, CDH-10, C45B2.2, C09B9.7, W01D2.3, C09B9.2, T19D7.7, C45B2.1, M03E7.3, COL-85, F56D6.14, Y69A2AR.23, COL-88, UGT-54, MEC-4, F56D6.13, F56D6.12, COL-81, F49D11.3, Y73F8A.35, F08A8.8, DAF-9, T22F…	815	6596	8803	1.20196	2.78112e-28	2.78112e-28	3.48717e-27
GOTERM_CC_5	GO:0031224~intrinsic to membrane	734	34.8363	8.46533e-30	Y37H2A.14, C06G4.4, T24C4.4, F56A11.6, Y105C5B.17, SRH-70, F58F12.2, F32B4.2, GTL-2, COL-97, C31H1.2, T05E12.3, COL-95, TSP-5, DPF-2, TSP-4, E04F6.4, ABT-5, UGT-63, T22C1.9, C38D9.5, ABT-1, T19A6.4, TSP-3, CDH-10, C45B2.2, C09B9.7, W01D2.3, C09B9.2, T19D7.7, C45B2.1, M03E7.3, COL-85, F56D6.14, Y69A2AR.23, COL-88, UGT-54, MEC-4, F56D6.13, F56D6.12, COL-81, F49D11.3, Y73F8A.35, F08A8.8, DAF-9, T22F…	815	6608	8803	1.19977	7.28019e-28	3.64009e-28	9.12843e-27
INTERPRO	IPR003125:Protein of unknown function WSN	41	1.94589	1.74664e-29	R06B10.1, M70.3, M70.1, C06C6.7, F36D3.5, C06C6.6, NHR-266, Y22D7AR.12, F56H1.3, C01G10.1, F36G9.13, C01G5.4, D1065.3, W03F11.4, K09F6.3, B0524.4, F58D5.6, C18H2.5, T08G3.7, C38D9.5, H20J04.1, Y57G7A.6, Y67A10A.3, Y69A2AR.19, C18H2.1, F40E12.2, F26D2.10, C09B9.7, T20B6.2, T16A1.2, Y48G1C.5, Y113G7C.1, H06I04.5, F07E5.8, C08G5.1, Y53H1C.3, T20H9.6, Y80D3A.8, K02F6.3, F37A4.4, Y39B6A.30	1253	56	13633	7.96592	1.20518e-26	1.20518e-26	2.62897e-26
GOTERM_CC_4	GO:0016021~integral to membrane	734	34.8363	3.24784e-29	Y37H2A.14, C06G4.4, T24C4.4, F56A11.6, Y105C5B.17, SRH-70, F58F12.2, F32B4.2, GTL-2, COL-97, C31H1.2, T05E12.3, COL-95, TSP-5, DPF-2, TSP-4, E04F6.4, ABT-5, UGT-63, T22C1.9, C38D9.5, ABT-1, T19A6.4, TSP-3, CDH-10, C45B2.2, C09B9.7, W01D2.3, C09B9.2, T19D7.7, C45B2.1, M03E7.3, COL-85, F56D6.14, Y69A2AR.23, COL-88, UGT-54, MEC-4, F56D6.13, F56D6.12, COL-81, F49D11.3, Y73F8A.35, F08A8.8, DAF-9, T22F…	819	6596	8829	1.19962	2.95553e-27	2.95553e-27	3.54077e-26
SMART	SM00453:WSN	41	1.94589	4.44896e-29	R06B10.1, M70.3, M70.1, C06C6.7, F36D3.5, C06C6.6, NHR-266, Y22D7AR.12, F56H1.3, C01G10.1, F36G9.13, C01G5.4, D1065.3, W03F11.4, K09F6.3, B0524.4, F58D5.6, C18H2.5, T08G3.7, C38D9.5, H20J04.1, Y57G7A.6, Y67A10A.3, Y69A2AR.19, C18H2.1, F40E12.2, F26D2.10, C09B9.7, T20B6.2, T16A1.2, Y48G1C.5, Y113G7C.1, H06I04.5, F07E5.8, C08G5.1, Y53H1C.3, T20H9.6, Y80D3A.8, K02F6.3, F37A4.4, Y39B6A.30	532	56	5537	7.62007	5.69466e-27	5.69466e-27	5.16672e-26
GOTERM_CC_4	GO:0031224~intrinsic to membrane	734	34.8363	8.35832e-29	Y37H2A.14, C06G4.4, T24C4.4, F56A11.6, Y105C5B.17, SRH-70, F58F12.2, F32B4.2, GTL-2, COL-97, C31H1.2, T05E12.3, COL-95, TSP-5, DPF-2, TSP-4, E04F6.4, ABT-5, UGT-63, T22C1.9, C38D9.5, ABT-1, T19A6.4, TSP-3, CDH-10, C45B2.2, C09B9.7, W01D2.3, C09B9.2, T19D7.7, C45B2.1, M03E7.3, COL-85, F56D6.14, Y69A2AR.23, COL-88, UGT-54, MEC-4, F56D6.13, F56D6.12, COL-81, F49D11.3, Y73F8A.35, F08A8.8, DAF-9, T22F…	819	6608	8829	1.19744	7.60607e-27	3.80304e-27	9.11217e-26
INTERPRO	IPR000242:Protein-tyrosine phosphatase, receptor/non-receptor type	51	2.4205	6.68301e-28	R06B10.1, F38H4.4, M05B5.1, C15H7.3, Y22D7AR.12, C48B6.4, M04G7.2, C33H5.16, ZK484.7, W03F11.4, T28F4.3, K09F6.3, C46A5.1, T04F3.3, F35C11.2, Y54F10BM.3, T22C1.8, C43E11.5, F40G12.10, Y116A8C.37, Y69A2AR.19, C50F2.5, B0207.1, ZK809.1, W01B6.6, Y57G11C.6, ZK354.8, F36H1.3, T20B6.1, F54F12.1, C07E3.4, Y48G1C.5, C24D10.1, F42C5.5, Y113G7C.1, F55H12.5, C02B10.6, H06I04.5, R155.3, F47B3.7, F55F8.7, F2…	1253	93	13633	5.96661	4.61127e-25	2.30564e-25	1.0059e-24
GOTERM_BP_5	GO:0016310~phosphorylation	110	5.22069	8.18964e-28	K06H7.8, C18H7.4, F26A1.3, ZK666.8, TAG-191, R10D12.10, F01D4.3, W09C3.1, C03C10.2, C14A4.13, W06F12.3, C27D8.1, F54H5.2, W03F8.2, F26E4.5, ZK596.2, W03A5.1, C09B9.4, ZC581.7, F57B9.8, OLD-1, R13H9.6, R13H9.5, ZC581.2, M7.7, F26A1.4, KIN-21, KIN-24, F22B3.8, C27D6.11, T19D12.5, B0207.7, C56C10.6, GCY-22, Y47G6A.13, Y69E1A.3, H05L14.1, F21F3.2, KIN-5, T06C10.3, Y65B4A.9, GCY-9, F33D11.7, T25B9.4, …	480	514	6749	3.00904	2.78448e-25	1.39224e-25	1.11525e-24
SMART	SM00194:PTPc	51	2.4205	1.7046e-27	R06B10.1, F38H4.4, M05B5.1, C15H7.3, Y22D7AR.12, C48B6.4, M04G7.2, C33H5.16, ZK484.7, W03F11.4, T28F4.3, K09F6.3, C46A5.1, T04F3.3, F35C11.2, Y54F10BM.3, T22C1.8, C43E11.5, F40G12.10, Y116A8C.37, Y69A2AR.19, C50F2.5, B0207.1, ZK809.1, W01B6.6, Y57G11C.6, ZK354.8, F36H1.3, T20B6.1, F54F12.1, C07E3.4, Y48G1C.5, C24D10.1, F42C5.5, Y113G7C.1, F55H12.5, C02B10.6, H06I04.5, R155.3, F47B3.7, F55F8.7, F2…	532	93	5537	5.70756	2.18188e-25	1.09094e-25	1.9796e-24
GOTERM_BP_FAT	GO:0006470~protein amino acid dephosphorylation	53	2.51542	5.84328e-27	R06B10.1, F38H4.4, ZK484.7, W03F11.4, T22C1.8, Y116A8C.37, C50F2.5, ZK809.1, Y57G11C.6, W01B6.6, F36H1.3, T20B6.1, C07E3.4, F42C5.5, F55H12.5, Y113G7C.1, C02B10.6, F20H11.4, C17H12.3, C17H12.5, Y80D3A.8, Y39B6A.30, C15H7.3, M05B5.1, C48B6.4, Y22D7AR.12, M04G7.2, C33H5.16, R09E10.9, CDC-25.4, K09F6.3, T28F4.3, C46A5.1, T04F3.3, Y54F10BM.3, F35C11.2, C43E11.5, F40G12.10, Y69A2AR.19, B0207.1, ZK354.…	582	125	7838	5.71016	3.65789e-24	1.2193e-24	8.68017e-24
GOTERM_MF_4	GO:0042578~phosphoric ester hydrolase activity	81	3.84433	9.66577e-27	R06B10.1, Y71G12B.30, F38H4.4, F55C5.2, ZK484.7, W03F11.4, C06A1.3, F23B12.1, T22C1.8, Y116A8C.37, F52H3.6, C50F2.5, ZK809.1, W01B6.6, Y57G11C.6, Y54G2A.24, F36H1.3, T20B6.1, C07E3.4, F42C5.5, Y113G7C.1, F55H12.5, C02B10.6, F20H11.4, C34D4.2, C17H12.3, C17H12.5, Y105C5B.3, Y80D3A.8, Y39B6A.30, ASM-2, C27B7.6, M05B5.1, C15H7.3, T16G12.7, Y22D7AR.12, C48B6.4, T09B9.3, M04G7.2, R09E10.9, GSP-3, C33H…	527	256	6132	3.6816	8.60254e-25	8.60254e-25	1.04925e-23
GOTERM_MF_5	GO:0016791~phosphatase activity	77	3.65449	1.106e-26	R06B10.1, Y71G12B.30, F38H4.4, ZK484.7, W03F11.4, C06A1.3, F23B12.1, T22C1.8, Y116A8C.37, F52H3.6, C50F2.5, ZK809.1, W01B6.6, Y57G11C.6, Y54G2A.24, F36H1.3, T20B6.1, C07E3.4, F42C5.5, Y113G7C.1, F55H12.5, C02B10.6, F20H11.4, C34D4.2, C17H12.3, C17H12.5, Y105C5B.3, Y80D3A.8, Y39B6A.30, C27B7.6, M05B5.1, C15H7.3, T16G12.7, Y22D7AR.12, C48B6.4, M04G7.2, R09E10.9, GSP-3, C33H5.16, F26C11.1, GSP-4, CD…	449	225	4951	3.77359	1.00646e-24	1.00646e-24	1.20575e-23
GOTERM_BP_5	GO:0016311~dephosphorylation	53	2.51542	2.81525e-26	R06B10.1, F38H4.4, ZK484.7, W03F11.4, T22C1.8, Y116A8C.37, C50F2.5, ZK809.1, Y57G11C.6, W01B6.6, F36H1.3, T20B6.1, C07E3.4, F42C5.5, F55H12.5, Y113G7C.1, C02B10.6, F20H11.4, C17H12.3, C17H12.5, Y80D3A.8, Y39B6A.30, C15H7.3, M05B5.1, C48B6.4, Y22D7AR.12, M04G7.2, C33H5.16, R09E10.9, CDC-25.4, K09F6.3, T28F4.3, C46A5.1, T04F3.3, Y54F10BM.3, F35C11.2, C43E11.5, F40G12.10, Y69A2AR.19, B0207.1, ZK354.…	480	134	6749	5.56121	9.57186e-24	3.19062e-24	3.83377e-23
GOTERM_CC_4	GO:0044425~membrane part	738	35.0261	6.38446e-26	Y37H2A.14, C06G4.4, T24C4.4, F56A11.6, Y105C5B.17, SRH-70, F58F12.2, F32B4.2, GTL-2, COL-97, C31H1.2, T05E12.3, COL-95, TSP-5, DPF-2, TSP-4, E04F6.4, ABT-5, UGT-63, T22C1.9, C38D9.5, ABT-1, T19A6.4, TSP-3, CDH-10, C45B2.2, C09B9.7, W01D2.3, C09B9.2, T19D7.7, C45B2.1, M03E7.3, CYC-2.2, COL-85, F56D6.14, Y69A2AR.23, COL-88, UGT-54, MEC-4, F56D6.13, F56D6.12, COL-81, F49D11.3, Y73F8A.35, F08A8.8, DA…	819	6752	8829	1.17829	5.80986e-24	1.93662e-24	6.96028e-23
GOTERM_BP_FAT	GO:0016310~phosphorylation	110	5.22069	1.06744e-25	K06H7.8, C18H7.4, F26A1.3, ZK666.8, TAG-191, R10D12.10, F01D4.3, W09C3.1, C03C10.2, C14A4.13, W06F12.3, C27D8.1, F54H5.2, W03F8.2, F26E4.5, ZK596.2, W03A5.1, C09B9.4, ZC581.7, F57B9.8, OLD-1, R13H9.6, R13H9.5, ZC581.2, M7.7, F26A1.4, KIN-21, KIN-24, F22B3.8, C27D6.11, T19D12.5, B0207.7, C56C10.6, GCY-22, Y47G6A.13, Y69E1A.3, H05L14.1, F21F3.2, KIN-5, T06C10.3, Y65B4A.9, GCY-9, F33D11.7, T25B9.4, …	582	514	7838	2.88212	6.68218e-23	1.67054e-23	1.58568e-22
GOTERM_BP_FAT	GO:0016311~dephosphorylation	53	2.51542	3.06764e-25	R06B10.1, F38H4.4, ZK484.7, W03F11.4, T22C1.8, Y116A8C.37, C50F2.5, ZK809.1, Y57G11C.6, W01B6.6, F36H1.3, T20B6.1, C07E3.4, F42C5.5, F55H12.5, Y113G7C.1, C02B10.6, F20H11.4, C17H12.3, C17H12.5, Y80D3A.8, Y39B6A.30, C15H7.3, M05B5.1, C48B6.4, Y22D7AR.12, M04G7.2, C33H5.16, R09E10.9, CDC-25.4, K09F6.3, T28F4.3, C46A5.1, T04F3.3, Y54F10BM.3, F35C11.2, C43E11.5, F40G12.10, Y69A2AR.19, B0207.1, ZK354.…	582	134	7838	5.32664	1.92035e-22	3.84069e-23	4.55698e-22
GOTERM_MF_FAT	GO:0016791~phosphatase activity	77	3.65449	5.39552e-25	R06B10.1, Y71G12B.30, F38H4.4, ZK484.7, W03F11.4, C06A1.3, F23B12.1, T22C1.8, Y116A8C.37, F52H3.6, C50F2.5, ZK809.1, W01B6.6, Y57G11C.6, Y54G2A.24, F36H1.3, T20B6.1, C07E3.4, F42C5.5, Y113G7C.1, F55H12.5, C02B10.6, F20H11.4, C34D4.2, C17H12.3, C17H12.5, Y105C5B.3, Y80D3A.8, Y39B6A.30, C27B7.6, M05B5.1, C15H7.3, T16G12.7, Y22D7AR.12, C48B6.4, M04G7.2, R09E10.9, GSP-3, C33H5.16, F26C11.1, GSP-4, CD…	632	225	6686	3.62041	1.75894e-22	8.79469e-23	7.30137e-22
GOTERM_BP_5	GO:0044267~cellular protein metabolic process	172	8.16327	3.35224e-24	R06B10.1, K06H7.8, C18H7.4, ZK666.8, F26A1.3, TAG-191, R10D12.10, ZK484.7, F01D4.3, C03C10.2, W09C3.1, C14A4.13, W06F12.3, C27D8.1, UBC-24, F54H5.2, T22C1.8, W03F8.2, F26E4.5, ZK596.2, W03A5.1, ZK809.1, C09B9.4, C07E3.4, ZC581.7, F42C5.5, F57B9.8, F55H12.5, OLD-1, C02B10.6, R13H9.6, R13H9.5, M7.7, ZC581.2, F20H11.4, F26A1.4, KIN-21, KIN-24, Y80D3A.8, F22B3.8, Y39B6A.30, C27D6.11, F55D12.6, T19D12…	480	1167	6749	2.07232	1.13976e-21	2.84941e-22	4.56503e-21
GOTERM_MF_FAT	GO:0004725~protein tyrosine phosphatase activity	53	2.51542	6.45951e-24	R06B10.1, F38H4.4, ZK484.7, W03F11.4, T22C1.8, Y116A8C.37, C50F2.5, ZK809.1, Y57G11C.6, W01B6.6, F36H1.3, T20B6.1, C07E3.4, F42C5.5, F55H12.5, Y113G7C.1, C02B10.6, F20H11.4, C17H12.3, C17H12.5, Y80D3A.8, Y39B6A.30, C15H7.3, M05B5.1, C48B6.4, Y22D7AR.12, M04G7.2, C33H5.16, R09E10.9, CDC-25.4, K09F6.3, T28F4.3, C46A5.1, T04F3.3, Y54F10BM.3, F35C11.2, C43E11.5, F40G12.10, Y69A2AR.19, B0207.1, ZK354.…	632	116	6686	4.83356	2.1058e-21	7.01933e-22	8.74119e-21
INTERPRO	IPR000719:Protein kinase, core	106	5.03085	7.67542e-24	K06H7.8, C18H7.4, F26A1.3, ZK666.8, TAG-191, R10D12.10, F01D4.3, W09C3.1, C03C10.2, C14A4.13, W06F12.3, C27D8.1, F54H5.2, W03F8.2, F26E4.5, ZK596.2, W03A5.1, C09B9.4, ZC581.7, F57B9.8, OLD-1, R13H9.6, R13H9.5, ZC581.2, M7.7, F26A1.4, KIN-21, KIN-24, F22B3.8, C27D6.11, T19D12.5, B0207.7, C56C10.6, GCY-22, Y47G6A.13, Y69E1A.3, H05L14.1, F21F3.2, KIN-5, T06C10.3, Y65B4A.9, GCY-9, F33D11.7, T25B9.4, …	1253	404	13633	2.85473	5.29604e-21	1.76535e-21	1.15527e-20
GOTERM_MF_5	GO:0004672~protein kinase activity	108	5.12577	1.74592e-23	K06H7.8, C18H7.4, F26A1.3, ZK666.8, TAG-191, R10D12.10, F01D4.3, W09C3.1, C03C10.2, C14A4.13, W06F12.3, C27D8.1, F54H5.2, W03F8.2, F26E4.5, ZK596.2, W03A5.1, C09B9.4, ZC581.7, F57B9.8, OLD-1, R13H9.6, R13H9.5, ZC581.2, M7.7, F26A1.4, KIN-21, KIN-24, F22B3.8, C27D6.11, T19D12.5, B0207.7, C56C10.6, GCY-22, Y47G6A.13, Y69E1A.3, H05L14.1, F21F3.2, KIN-5, T06C10.3, Y65B4A.9, GCY-9, F33D11.7, T25B9.4, …	449	448	4951	2.65823	1.58878e-21	7.94392e-22	1.90338e-20
INTERPRO	IPR000535:Major sperm protein	42	1.99336	6.73133e-23	F38H4.6, MSP-31, Y48B6A.5, MSP-33, MSP-36, MSP-38, MSP-113, C15H11.1, F54H5.3, MSP-3, C10H11.7, C35E7.9, SSP-11, MSP-40, F13A7.1, MSP-152, T22B3.3, SSP-19, SSP-16, W03D8.5, Y53F4B.19, C34D4.3, F21H7.5, MSP-142, F42A9.7, C14A4.8, F57A10.2, MSP-56, MSP-57, ZK1307.4, MSP-59, F36D3.4, MSP-53, MSP-19, MSP-55, DCT-9, F58A6.9, MSP-10, ZK546.3, F36H12.3, MSP-64, MSP-63, MSP-65, SSP-31, F52F12.8, ZK354.7,…	1253	77	13633	5.9347	4.64462e-20	1.16116e-20	1.01317e-19
INTERPRO	IPR008962:PapD-like	40	1.89843	8.23036e-23	F38H4.6, MSP-31, Y48B6A.5, MSP-33, MSP-36, MSP-38, MSP-113, C15H11.1, F54H5.3, MSP-3, C10H11.7, C35E7.9, SSP-11, F13A7.1, MSP-40, MSP-152, T22B3.3, SSP-19, SSP-16, W03D8.5, C34D4.3, F21H7.5, MSP-142, F42A9.7, F57A10.2, MSP-56, MSP-57, ZK1307.4, MSP-59, F36D3.4, MSP-53, MSP-19, MSP-55, DCT-9, F58A6.9, MSP-10, ZK546.3, F36H12.3, MSP-64, MSP-63, MSP-65, SSP-31, Y41C4A.7, F52F12.8, ZK354.7, MSP-45, F…	1253	70	13633	6.21731	5.67895e-20	1.13579e-20	1.2388e-19
GOTERM_MF_FAT	GO:0004674~protein serine/threonine kinase activity	106	5.03085	1.24079e-22	K06H7.8, C18H7.4, F26A1.3, ZK666.8, TAG-191, R10D12.10, F01D4.3, W09C3.1, C03C10.2, C14A4.13, W06F12.3, C27D8.1, F54H5.2, W03F8.2, F26E4.5, ZK596.2, W03A5.1, C09B9.4, ZC581.7, F57B9.8, OLD-1, R13H9.6, R13H9.5, ZC581.2, M7.7, F26A1.4, KIN-21, KIN-24, F22B3.8, C27D6.11, T19D12.5, B0207.7, C56C10.6, GCY-22, Y47G6A.13, Y69E1A.3, H05L14.1, F21F3.2, KIN-5, T06C10.3, Y65B4A.9, GCY-9, F33D11.7, T25B9.4, …	632	418	6686	2.68274	4.04497e-20	1.01124e-20	1.67907e-19
GOTERM_MF_1	GO:0005198~structural molecule activity	110	5.22069	4.25611e-22	Y48B6A.5, COL-161, DPY-3, DPY-7, COL-158, COL-97, C15H11.1, COL-95, F54H5.3, COL-153, MSP-3, IFP-1, MSP-152, COL-10, T22B3.3, COL-13, COL-12, Y53F4B.19, COL-145, COL-146, COL-85, GRL-4, C34D4.3, COL-141, COL-88, COL-143, F21H7.5, MSP-142, COL-14, MEC-7, F55D12.6, MSP-19, R105.1, COL-182, COL-180, F58A6.9, MSP-10, COL-175, Y57G11A.2, Y39F10C.1, MSP-64, MSP-63, MSP-65, F58E6.5, T02H6.9, Y48G1C.5, M…	853	468	9555	2.63286	4.25611e-21	4.25611e-21	2.55567e-19
GOTERM_BP_4	GO:0019538~protein metabolic process	207	9.82439	9.06384e-22	Y71H2AM.25, TAG-191, R10D12.10, ZK484.7, Y19D10B.6, DPF-2, C14A4.13, C27D8.1, F54H5.2, T22C1.8, W03A5.1, C09B9.4, C07E3.4, R03G8.4, F57B9.8, F42C5.5, OLD-1, F55H12.5, M7.7, NAS-38, KIN-21, KIN-24, ZMP-1, C27D6.11, F55D12.6, T19D12.5, B0207.7, GLT-5, C56C10.6, C08F11.7, NAS-25, T19D2.1, R09E10.9, C33H5.16, TTLL-15, K09F6.3, T25D3.3, C46A5.1, T04F3.3, Y54F10BM.3, F21F3.2, Y69A2AR.19, B0207.1, NAS-6…	565	1536	7683	1.83257	3.27205e-19	1.09068e-19	1.24534e-18
GOTERM_BP_4	GO:0044267~cellular protein metabolic process	172	8.16327	1.09172e-21	R06B10.1, K06H7.8, C18H7.4, ZK666.8, F26A1.3, TAG-191, R10D12.10, ZK484.7, F01D4.3, C03C10.2, W09C3.1, C14A4.13, W06F12.3, C27D8.1, UBC-24, F54H5.2, T22C1.8, W03F8.2, F26E4.5, ZK596.2, W03A5.1, ZK809.1, C09B9.4, C07E3.4, ZC581.7, F42C5.5, F57B9.8, F55H12.5, OLD-1, C02B10.6, R13H9.6, R13H9.5, M7.7, ZC581.2, F20H11.4, F26A1.4, KIN-21, KIN-24, Y80D3A.8, F22B3.8, Y39B6A.30, C27D6.11, F55D12.6, T19D12…	565	1167	7683	2.0042	3.94111e-19	9.85278e-20	1.49999e-18
GOTERM_MF_FAT	GO:0004672~protein kinase activity	108	5.12577	3.2097e-21	K06H7.8, C18H7.4, F26A1.3, ZK666.8, TAG-191, R10D12.10, F01D4.3, W09C3.1, C03C10.2, C14A4.13, W06F12.3, C27D8.1, F54H5.2, W03F8.2, F26E4.5, ZK596.2, W03A5.1, C09B9.4, ZC581.7, F57B9.8, OLD-1, R13H9.6, R13H9.5, ZC581.2, M7.7, F26A1.4, KIN-21, KIN-24, F22B3.8, C27D6.11, T19D12.5, B0207.7, C56C10.6, GCY-22, Y47G6A.13, Y69E1A.3, H05L14.1, F21F3.2, KIN-5, T06C10.3, Y65B4A.9, GCY-9, F33D11.7, T25B9.4, …	632	448	6686	2.55032	1.04636e-18	2.09272e-19	4.34346e-18
GOTERM_MF_FAT	GO:0005198~structural molecule activity	110	5.22069	1.05108e-20	Y48B6A.5, COL-161, DPY-3, DPY-7, COL-158, COL-97, C15H11.1, COL-95, F54H5.3, COL-153, MSP-3, IFP-1, MSP-152, COL-10, T22B3.3, COL-13, COL-12, Y53F4B.19, COL-145, COL-146, COL-85, GRL-4, C34D4.3, COL-141, COL-88, COL-143, F21H7.5, MSP-142, COL-14, MEC-7, F55D12.6, MSP-19, R105.1, COL-182, COL-180, F58A6.9, MSP-10, COL-175, Y57G11A.2, Y39F10C.1, MSP-64, MSP-63, MSP-65, F58E6.5, T02H6.9, Y48G1C.5, M…	632	468	6686	2.48654	3.42653e-18	5.71088e-19	1.42236e-17
GOTERM_BP_3	GO:0019538~protein metabolic process	207	9.82439	1.24829e-20	Y71H2AM.25, TAG-191, R10D12.10, ZK484.7, Y19D10B.6, DPF-2, C14A4.13, C27D8.1, F54H5.2, T22C1.8, W03A5.1, C09B9.4, C07E3.4, R03G8.4, F57B9.8, F42C5.5, OLD-1, F55H12.5, M7.7, NAS-38, KIN-21, KIN-24, ZMP-1, C27D6.11, F55D12.6, T19D12.5, B0207.7, GLT-5, C56C10.6, C08F11.7, NAS-25, T19D2.1, R09E10.9, C33H5.16, TTLL-15, K09F6.3, T25D3.3, C46A5.1, T04F3.3, Y54F10BM.3, F21F3.2, Y69A2AR.19, B0207.1, NAS-6…	591	1536	7908	1.80326	3.28301e-18	1.64151e-18	1.63458e-17
INTERPRO	IPR000387:Dual-specific/protein-tyrosine phosphatase, conserved region	42	1.99336	1.50429e-20	R06B10.1, F38H4.4, C15H7.3, M05B5.1, Y22D7AR.12, M04G7.2, C33H5.16, ZK484.7, W03F11.4, K09F6.3, T28F4.3, C46A5.1, T04F3.3, F35C11.2, Y54F10BM.3, T22C1.8, F40G12.10, Y69A2AR.19, B0207.1, ZK809.1, Y57G11C.6, W01B6.6, ZK354.8, F36H1.3, F54F12.1, Y48G1C.5, C24D10.1, Y113G7C.1, C02B10.6, H06I04.5, R155.3, F47B3.7, F55F8.7, F20H11.4, C17H12.3, C17H12.5, Y80D3A.8, K07F5.6, T27A3.5, F25H5.7, Y39B6A.30, P…	1253	86	13633	5.31363	1.03796e-17	1.72994e-18	2.2642e-17
GOTERM_MF_4	GO:0016773~phosphotransferase activity, alcohol group as acceptor	108	5.12577	3.83582e-20	K06H7.8, C18H7.4, F26A1.3, ZK666.8, TAG-191, R10D12.10, F01D4.3, W09C3.1, C03C10.2, C14A4.13, W06F12.3, C27D8.1, F54H5.2, W03F8.2, F26E4.5, ZK596.2, W03A5.1, C09B9.4, ZC581.7, F57B9.8, OLD-1, R13H9.6, R13H9.5, ZC581.2, M7.7, F26A1.4, KIN-21, KIN-24, F22B3.8, C27D6.11, T19D12.5, B0207.7, C56C10.6, GCY-22, Y47G6A.13, Y69E1A.3, H05L14.1, F21F3.2, KIN-5, T06C10.3, Y65B4A.9, GCY-9, F33D11.7, T25B9.4, …	527	510	6132	2.46403	3.41388e-18	1.70694e-18	4.1639e-17
GOTERM_MF_3	GO:0016788~hydrolase activity, acting on ester bonds	97	4.6037	5.11042e-20	R06B10.1, Y71G12B.30, F38H4.4, CRN-6, F55C5.2, ZK484.7, C06A1.3, W03F11.4, C31H1.5, Y51A2B.4, F23B12.1, T22C1.8, Y116A8C.37, F52H3.6, C50F2.5, ZK809.1, F44B9.10, W01B6.6, Y57G11C.6, Y54G2A.24, D2021.4, F36H1.3, T20B6.1, W03D8.8, C07E3.4, F42C5.5, Y113G7C.1, F55H12.5, T19D7.7, C02B10.6, F20H11.4, C34D4.2, PAF-1, C17H12.3, C17H12.5, Y105C5B.3, SUL-3, Y80D3A.8, ZK262.3, Y39B6A.30, K11E4.1, ASM-2, Y4…	567	467	7243	2.65332	3.83281e-18	3.83281e-18	5.3634e-17
GOTERM_MF_2	GO:0042302~structural constituent of cuticle	51	2.4205	4.10385e-18	COL-58, COL-161, DPY-3, DPY-7, COL-158, COL-97, COL-95, COL-3, COL-117, COL-153, COL-7, COL-10, COL-13, COL-12, COL-49, BLI-2, COL-186, BLI-1, COL-145, COL-109, COL-85, COL-146, COL-141, COL-88, COL-143, SQT-3, COL-107, COL-101, COL-41, COL-14, COL-43, COL-182, COL-180, COL-139, COL-71, COL-175, COL-137, COL-138, COL-79, COL-77, COL-133, COL-162, COL-165, COL-129, COL-60, COL-167, COL-166, COL-16…	734	155	8884	3.98246	1.68258e-16	1.68258e-16	3.77665e-15
GOTERM_MF_4	GO:0016301~kinase activity	109	5.17323	4.69172e-18	K06H7.8, C18H7.4, F26A1.3, ZK666.8, TAG-191, R10D12.10, F01D4.3, W09C3.1, C03C10.2, C14A4.13, W06F12.3, C27D8.1, F54H5.2, W03F8.2, F26E4.5, ZK596.2, W03A5.1, C09B9.4, ZC581.7, F57B9.8, OLD-1, R13H9.6, R13H9.5, ZC581.2, M7.7, D1044.1, F26A1.4, KIN-21, KIN-24, F22B3.8, C27D6.11, T19D12.5, B0207.7, C56C10.6, GCY-22, Y47G6A.13, Y69E1A.3, H05L14.1, F21F3.2, KIN-5, T06C10.3, Y65B4A.9, GCY-9, F33D11.7, …	527	550	6132	2.30598	4.17563e-16	1.39188e-16	5.093e-15
INTERPRO	IPR000980:SH2 motif	34	1.61367	2.37796e-17	R11E3.1, C35E7.10, KIN-26, C18H7.4, Y4C6A.1, F01D4.3, C25A8.5, Y69E1A.3, Y52D5A.2, C55C3.4, W03F8.2, F26E4.5, Y116A8C.38, KIN-5, B0207.11, T08G11.2, FRK-1, K09B11.5, T06C10.3, W01B6.5, ZC581.7, F57B9.8, T25B9.4, T25B9.5, ZK622.1, C34F11.5, SPE-8, KIN-21, KIN-24, F59A3.8, F22B3.8, Y116A8C.24, T21G5.1, Y43C5B.2	1253	67	13633	5.52134	1.64079e-14	2.34399e-15	3.5792e-14
INTERPRO	IPR002486:Nematode cuticle collagen, N-terminal	51	2.4205	4.09645e-17	COL-58, COL-161, DPY-3, DPY-7, COL-158, COL-97, COL-95, COL-3, COL-117, COL-153, COL-7, COL-10, COL-13, COL-12, COL-49, BLI-2, COL-186, BLI-1, COL-145, COL-109, COL-85, COL-146, COL-141, COL-88, COL-143, SQT-3, COL-107, COL-101, COL-41, COL-14, COL-43, COL-182, COL-180, COL-139, COL-71, COL-175, COL-137, COL-138, COL-79, COL-77, COL-133, COL-162, COL-165, COL-129, COL-60, COL-167, COL-166, COL-16…	1253	147	13633	3.77479	2.82655e-14	3.53319e-15	6.1658e-14
SMART	SM00252:SH2	34	1.61367	5.60948e-17	R11E3.1, C35E7.10, KIN-26, C18H7.4, Y4C6A.1, F01D4.3, C25A8.5, Y69E1A.3, Y52D5A.2, C55C3.4, W03F8.2, F26E4.5, Y116A8C.38, KIN-5, B0207.11, T08G11.2, FRK-1, K09B11.5, T06C10.3, W01B6.5, ZC581.7, F57B9.8, T25B9.4, T25B9.5, ZK622.1, C34F11.5, SPE-8, KIN-21, KIN-24, F59A3.8, F22B3.8, Y116A8C.24, T21G5.1, Y43C5B.2	532	67	5537	5.28162	1.42109e-14	4.77396e-15	1.33227e-13
GOTERM_MF_3	GO:0016772~transferase activity, transferring phosphorus-containing groups	110	5.22069	3.51954e-16	K06H7.8, C18H7.4, F26A1.3, ZK666.8, TAG-191, R10D12.10, F01D4.3, W09C3.1, C03C10.2, C14A4.13, W06F12.3, C27D8.1, F54H5.2, W03F8.2, F26E4.5, ZK596.2, W03A5.1, C09B9.4, ZC581.7, F57B9.8, OLD-1, R13H9.6, R13H9.5, ZC581.2, M7.7, D1044.1, F26A1.4, KIN-21, KIN-24, F22B3.8, C27D6.11, T19D12.5, B0207.7, C56C10.6, GCY-22, Y47G6A.13, Y69E1A.3, H05L14.1, F21F3.2, KIN-5, T06C10.3, Y65B4A.9, GCY-9, F33D11.7, …	567	639	7243	2.19901	2.498e-14	1.24345e-14	3.44169e-13
INTERPRO	IPR008160:Collagen triple helix repeat	56	2.65781	5.21544e-16	COL-58, COL-161, DPY-3, DPY-7, COL-158, COL-97, COL-3, COL-95, COL-117, COL-153, COL-7, COL-10, COL-13, COL-12, COL-49, BLI-2, COL-186, BLI-1, COL-145, COL-109, COL-85, COL-146, COL-141, COL-104, COL-88, COL-143, SQT-3, COL-107, COL-101, COL-41, COL-43, COL-14, COL-81, COL-182, COL-180, COL-139, COL-71, COL-175, COL-137, COL-138, COL-177, COL-79, COL-77, COL-74, COL-133, COL-162, COL-165, COL-129…	1253	182	13633	3.34778	3.83027e-13	4.25215e-14	8.32667e-13
GOTERM_MF_FAT	GO:0042302~structural constituent of cuticle	51	2.4205	1.02962e-15	COL-58, COL-161, DPY-3, DPY-7, COL-158, COL-97, COL-95, COL-3, COL-117, COL-153, COL-7, COL-10, COL-13, COL-12, COL-49, BLI-2, COL-186, BLI-1, COL-145, COL-109, COL-85, COL-146, COL-141, COL-88, COL-143, SQT-3, COL-107, COL-101, COL-41, COL-14, COL-43, COL-182, COL-180, COL-139, COL-71, COL-175, COL-137, COL-138, COL-79, COL-77, COL-133, COL-162, COL-165, COL-129, COL-60, COL-167, COL-166, COL-16…	632	155	6686	3.48087	3.25739e-13	4.65183e-14	1.35447e-12
SP_PIR_KEYWORDS	tyrosine-protein kinase	35	1.66113	3.7213e-15	R11E3.1, C35E7.10, KIN-26, C18H7.4, Y4C6A.1, F01D4.3, C25A8.5, Y69E1A.3, Y52D5A.2, C55C3.4, W03F8.2, F26E4.5, W03A5.1, Y116A8C.38, KIN-5, FRK-1, K09B11.5, F09A5.2, T06C10.3, W01B6.5, ZC581.7, F57B9.8, OLD-1, T25B9.4, T25B9.5, ZK622.1, C34F11.5, SPE-8, KIN-21, KIN-24, F59A3.8, F22B3.8, Y116A8C.24, T21G5.1, Y43C5B.2	2048	73	19674	4.60583	6.87006e-13	6.87006e-13	4.66294e-12
INTERPRO	IPR017441:Protein kinase, ATP binding site	69	3.2748	8.23846e-15	K06H7.8, C35E7.10, Y69F12A.1, C05C12.1, C18H7.4, C25H3.1, ZK666.8, F01D4.3, C25A8.5, C03C10.2, W09C3.1, C14A4.13, W06F12.3, C27D8.1, W02B12.12, W03F8.2, F26E4.5, B0218.5, ZK596.2, W03A5.1, Y116A8C.38, FRK-1, F38E1.3, K09B11.5, W01B6.5, ZC581.7, F57B9.8, OLD-1, R13H9.6, ZC581.2, C34F11.5, KIN-21, F53C3.1, Y38H8A.4, F59A3.8, ZK507.3, Y38H8A.3, F22B3.8, Y116A8C.24, C27D6.11, Y43C5B.2, R11E3.1, T19D1…	1253	272	13633	2.76007	5.6688e-12	5.6688e-13	1.23679e-11
INTERPRO	IPR008266:Tyrosine protein kinase, active site	34	1.61367	2.79278e-14	R11E3.1, C35E7.10, KIN-26, C18H7.4, Y4C6A.1, F01D4.3, C25A8.5, Y69E1A.3, Y52D5A.2, C55C3.4, F20D6.5, F26E4.5, KIN-30, W03A5.1, Y116A8C.38, KIN-5, FRK-1, K09B11.5, F09A5.2, T06C10.3, ZC581.7, F57B9.8, OLD-1, T25B9.4, T25B9.5, ZK622.1, SPE-8, C34F11.5, KIN-21, KIN-24, F59A3.8, F22B3.8, Y116A8C.24, T21G5.1	1253	81	13633	4.56703	1.93046e-11	1.75493e-12	4.21108e-11
INTERPRO	IPR001245:Tyrosine protein kinase	41	1.94589	2.92689e-14	R11E3.1, C35E7.10, KIN-26, C18H7.4, GCY-22, Y4C6A.1, F01D4.3, Y69E1A.3, C25A8.5, Y52D5A.2, C14A4.13, C55C3.4, W03F8.2, F26E4.5, KIN-30, W03A5.1, Y116A8C.38, KIN-5, FRK-1, C39H7.1, K09B11.5, F09A5.2, T06C10.3, W01B6.5, ZC581.7, F57B9.8, OLD-1, GCY-9, T25B9.4, T25B9.5, ZK622.1, C34F11.5, SPE-8, KIN-21, KIN-24, F59A3.8, Y38H8A.3, F22B3.8, Y116A8C.24, T21G5.1, Y43C5B.2	1253	115	13633	3.87906	2.02238e-11	1.68532e-12	4.41203e-11
INTERPRO	IPR006186:Serine/threonine-specific protein phosphatase and bis(5-nucleosyl)-tetraphosphatase	26	1.23398	6.86035e-14	C27B7.6, Y71G12B.30, T16G12.7, R08C7.8, ZC477.2, GSP-3, GSP-4, C06A1.3, Y69E1A.4, R08A2.2, F49E11.7, F23B12.1, R03D7.8, F52H3.6, F20D6.6, Y40H4A.2, C23G10.1, ZC477.10, F58G1.3, Y54G2A.24, F42G8.8, ZK938.1, C47A4.3, C34D4.2, T25B9.2, R13A5.11	1253	49	13633	5.77321	4.73421e-11	3.64175e-12	1.03273e-10
SMART	SM00219:TyrKc	41	1.94589	7.19147e-14	R11E3.1, C35E7.10, KIN-26, C18H7.4, GCY-22, Y4C6A.1, F01D4.3, Y69E1A.3, C25A8.5, Y52D5A.2, C14A4.13, C55C3.4, W03F8.2, F26E4.5, KIN-30, W03A5.1, Y116A8C.38, KIN-5, FRK-1, C39H7.1, K09B11.5, F09A5.2, T06C10.3, W01B6.5, ZC581.7, F57B9.8, OLD-1, GCY-9, T25B9.4, T25B9.5, ZK622.1, C34F11.5, SPE-8, KIN-21, KIN-24, F59A3.8, Y38H8A.3, F22B3.8, Y116A8C.24, T21G5.1, Y43C5B.2	532	115	5537	3.71064	9.20863e-12	2.30216e-12	8.35443e-11
SMART	SM00156:PP2Ac	26	1.23398	1.43563e-13	C27B7.6, Y71G12B.30, T16G12.7, R08C7.8, ZC477.2, GSP-3, GSP-4, C06A1.3, Y69E1A.4, R08A2.2, F49E11.7, F23B12.1, R03D7.8, F52H3.6, F20D6.6, Y40H4A.2, C23G10.1, ZC477.10, F58G1.3, Y54G2A.24, F42G8.8, ZK938.1, C47A4.3, C34D4.2, T25B9.2, R13A5.11	532	49	5537	5.52256	1.83746e-11	3.67495e-12	1.66711e-10
INTERPRO	IPR000387:Protein-tyrosine phosphatase	27	1.28144	2.21227e-13	R06B10.1, M05B5.1, Y22D7AR.12, M04G7.2, C33H5.16, ZK484.7, W03F11.4, C46A5.1, Y54F10BM.3, F35C11.2, Y69A2AR.19, B0207.1, ZK809.1, Y57G11C.6, ZK354.8, Y48G1C.5, C24D10.1, C02B10.6, R155.3, F47B3.7, F55F8.7, F20H11.4, C17H12.3, C17H12.5, K07F5.6, T27A3.5, PPH-2	1253	55	13633	5.34123	1.52675e-10	1.09053e-11	3.33045e-10
GOTERM_MF_1	GO:0003824~catalytic activity	433	20.5505	2.55629e-13	TAG-191, C31H1.5, Y19D10B.6, CPI-1, DPF-2, C14A4.13, Y51A2B.4, ABT-5, E04F6.4, C27D8.1, F54H5.2, UGT-63, T22C1.8, ABT-1, W03A5.1, C09B9.4, F42C5.5, F57B9.8, T19D7.7, NAS-38, M7.7, PAF-1, KIN-21, UGT-54, KIN-24, C27D6.11, MEC-7, DAF-9, B0207.7, GLT-5, T16G12.7, UGT-49, ACDH-5, T19D2.1, NAS-25, GSP-3, C33H5.16, R09E10.9, GSP-4, K09F6.3, UGT-42, T25D3.3, C46A5.1, ACDH-7, ACDH-8, UGT-47, F21F3.2, Y69…	853	3726	9555	1.30175	2.55684e-12	1.27842e-12	1.53533e-10
INTERPRO	IPR016186:C-type lectin-like	57	2.70527	6.04458e-13	CLEC-210, C49C3.11, CLEC-66, CLEC-64, CLEC-260, CLEC-28, CLEC-27, CLEC-160, CLEC-123, CLEC-26, CLEC-25, CLEC-60, CLEC-24, CLEC-22, CLEC-166, CLEC-165, CLEC-265, CLEC-197, CLEC-198, CLEC-119, CLEC-117, CLEC-80, CLEC-7, CLEC-76, CLEC-4, CLEC-151, CLEC-36, CLEC-72, CLEC-35, CLEC-73, CLEC-37, CLEC-154, CLEC-31, CLEC-153, CLEC-33, CLEC-79, CLEC-85, CLEC-146, CLEC-184, CLEC-86, CLEC-143, CLEC-41, CLEC-…	1253	218	13633	2.84485	4.1704e-10	2.78026e-11	9.09728e-10
INTERPRO	IPR001304:C-type lectin	62	2.94257	7.81727e-13	CLEC-210, C49C3.11, CLEC-66, CLEC-64, CLEC-260, CLEC-28, CLEC-27, CLEC-160, CLEC-123, CLEC-26, CLEC-25, CLEC-60, CLEC-24, CLEC-22, CLEC-166, CLEC-165, CLEC-265, CLEC-197, CLEC-198, CLEC-119, CLEC-117, CLEC-80, CLEC-7, CLEC-76, CLEC-4, CLEC-151, CLEC-36, CLEC-72, CLEC-35, CLEC-73, CLEC-37, CLEC-154, CLEC-31, CLEC-153, CLEC-33, CLEC-79, CLEC-182, CLEC-85, CLEC-146, CLEC-184, CLEC-86, CLEC-143, CLEC…	1253	251	13633	2.68756	5.39379e-10	3.37111e-11	1.17659e-09
SMART	SM00034:CLECT	62	2.94257	2.02589e-12	CLEC-210, C49C3.11, CLEC-66, CLEC-64, CLEC-260, CLEC-28, CLEC-27, CLEC-160, CLEC-123, CLEC-26, CLEC-25, CLEC-60, CLEC-24, CLEC-22, CLEC-166, CLEC-165, CLEC-265, CLEC-197, CLEC-198, CLEC-119, CLEC-117, CLEC-80, CLEC-7, CLEC-76, CLEC-4, CLEC-151, CLEC-36, CLEC-72, CLEC-35, CLEC-73, CLEC-37, CLEC-154, CLEC-31, CLEC-153, CLEC-33, CLEC-79, CLEC-182, CLEC-85, CLEC-146, CLEC-184, CLEC-86, CLEC-143, CLEC…	532	251	5537	2.57087	2.5932e-10	4.322e-11	2.35278e-09
GOTERM_MF_FAT	GO:0004713~protein tyrosine kinase activity	76	3.60702	3.32797e-12	K06H7.8, C35E7.10, Y69F12A.1, C18H7.4, ZK666.8, TAG-191, T05C12.1, F01D4.3, C25A8.5, C14A4.13, W06F12.3, C27D8.1, F54H5.2, W02B12.12, W03F8.2, F26E4.5, ZK596.2, W03A5.1, Y116A8C.38, FRK-1, F38E1.3, GSKA-3, K09B11.5, W01B6.2, F35C11.3, W01B6.5, Y39G8B.5, ZC581.7, F57B9.8, OLD-1, M05D6.1, R13H9.5, C34F11.5, GCY-11, KIN-21, F59A3.8, F53C3.1, KIN-24, Y38H8A.4, Y38H8A.3, F22B3.8, Y116A8C.24, C27D6.11,…	632	351	6686	2.29063	1.08493e-09	1.35616e-10	4.50355e-09
INTERPRO	IPR004843:Metallophosphoesterase	28	1.3289	3.57832e-12	C27B7.6, Y71G12B.30, T16G12.7, R08C7.8, ZC477.2, GSP-3, GSP-4, C06A1.3, Y69E1A.4, R08A2.2, F49E11.7, F23B12.1, F52H3.6, F20D6.6, Y40H4A.2, C23G10.1, F58G1.3, Y54G2A.24, F42G8.8, ZK938.1, C47A4.3, K07C11.7, H25K10.1, C34D4.2, T25B9.2, Y105C5B.3, R13A5.11, ASM-2	1253	65	13633	4.68689	2.46907e-09	1.45239e-10	5.38599e-09
GOTERM_MF_2	GO:0016740~transferase activity	170	8.06834	4.79441e-12	K06H7.8, C18H7.4, ZK666.8, F26A1.3, TAG-191, R10D12.10, F01D4.3, C03C10.2, W09C3.1, C14A4.13, F41E7.6, W06F12.3, C27D8.1, F54H5.2, UGT-63, W03F8.2, F26E4.5, ZK596.2, W03A5.1, K02E11.6, C09B9.4, ZC581.7, F57B9.8, OLD-1, R13H9.6, R13H9.5, M7.7, ZC581.2, D1044.1, F26A1.4, UGT-2, KIN-21, UGT-54, KIN-24, F22B3.8, UGT-4, C27D6.11, UGT-8, UGT-7, GST-41, T19D12.5, B0207.7, C56C10.6, UGT-49, GCY-22, Y47G6…	734	1249	8884	1.6474	1.9657e-10	9.82849e-11	4.41213e-09
UP_SEQ_FEATURE	domain:MSP	13	0.616991	3.44034e-11	F38H4.6, MSP-56, MSP-31, MSP-57, ZK1307.4, MSP-33, MSP-59, MSP-53, MSP-36, MSP-19, MSP-55, MSP-38, MSP-113, F58A6.9, MSP-10, MSP-64, MSP-63, MSP-3, MSP-65, SSP-31, SSP-11, MSP-40, MSP-152, SSP-19, MSP-45, SSP-16, MSP-81, MSP-49, MSP-79, MSP-78, MSP-77, ZK688.12, MSP-76, MSP-51, MSP-50, MSP-142, ZK1307.3	204	18	3249	11.5025	1.4243e-08	1.4243e-08	4.82262e-08
GOTERM_MF_3	GO:0001883~purine nucleoside binding	134	6.35975	1.2477e-10	K06H7.8, C18H7.4, ZK666.8, C44C10.4, F26A1.3, TAG-191, R10D12.10, F01D4.3, W09C3.1, C03C10.2, C14A4.13, W06F12.3, C27D8.1, ABT-5, F54H5.2, W03F8.2, ABT-1, F26E4.5, ZK596.2, W03A5.1, C09B9.4, ZC581.7, F57B9.8, OLD-1, R13H9.6, R13H9.5, ZC581.2, M7.7, F26A1.4, KIN-21, KIN-24, F22B3.8, C27D6.11, T19D12.5, B0207.7, C56C10.6, GCY-22, Y47G6A.13, ACDH-5, Y69E1A.3, H05L14.1, ACDH-7, ACDH-8, F21F3.2, KIN-5…	567	1010	7243	1.6948	9.35776e-09	3.11925e-09	1.30947e-07
INTERPRO	IPR016130:Protein-tyrosine phosphatase, active site	24	1.13906	2.88484e-10	ZK354.8, C15H7.3, F36H1.3, F54F12.1, T20B6.1, Y22D7AR.12, M04G7.2, Y113G7C.1, C33H5.16, C02B10.6, ZK484.7, H06I04.5, R155.3, W03F11.4, T28F4.3, F47B3.7, K09F6.3, F55F8.7, F20H11.4, C17H12.3, T22C1.8, T27A3.5, F25H5.7, B0207.1	1253	57	13633	4.58117	1.99054e-07	1.10585e-08	4.34213e-07
GOTERM_MF_2	GO:0016787~hydrolase activity	187	8.87518	1.12724e-09	R06B10.1, Y71H2AM.25, CRN-6, LYS-5, ZK484.7, C31H1.5, CPI-1, DPF-2, Y19D10B.6, Y51A2B.4, C29F5.3, F23B12.1, ABT-5, T22C1.8, F42G10.1, ABT-1, ZK809.1, F44B9.10, Y54G2A.24, D2021.4, C07E3.4, R03G8.4, F42C5.5, F55H12.5, F45E1.5, T19D7.7, C02B10.6, NAS-38, K07C11.7, F20H11.4, C34D4.2, PAF-1, DLC-4, DLC-6, CPZ-1, SUL-3, Y80D3A.8, ZK262.3, Y39B6A.30, ZMP-1, MEC-7, K11E4.1, ASM-2, TAG-329, MLC-2, C04E6.…	734	1508	8884	1.5009	4.62169e-08	1.54056e-08	1.03736e-06
PIR_SUPERFAMILY	PIRSF000908:serine/threonine-protein phosphatase, conventional type	17	0.806834	1.21869e-09	C23G10.1, Y71G12B.30, F58G1.3, Y54G2A.24, T16G12.7, F42G8.8, ZK938.1, GSP-4, C06A1.3, Y69E1A.4, F49E11.7, C34D4.2, F23B12.1, T25B9.2, F52H3.6, Y40H4A.2, R13A5.11	448	29	4541	5.94189	3.18079e-07	3.18079e-07	1.59392e-06
GOTERM_MF_3	GO:0032553~ribonucleotide binding	141	6.69198	1.45242e-09	K06H7.8, C18H7.4, ZK666.8, C44C10.4, F26A1.3, TAG-191, R10D12.10, F01D4.3, W09C3.1, C03C10.2, C14A4.13, W06F12.3, C27D8.1, ABT-5, F54H5.2, W03F8.2, ABT-1, F26E4.5, ZK596.2, W03A5.1, C09B9.4, ZC581.7, F57B9.8, OLD-1, R13H9.6, R13H9.5, ZC581.2, M7.7, F26A1.4, KIN-21, KIN-24, F22B3.8, C27D6.11, MEC-7, T19D12.5, B0207.7, C56C10.6, GCY-22, Y47G6A.13, Y69E1A.3, H05L14.1, F21F3.2, KIN-5, KLP-17, T06C10.…	567	1120	7243	1.60819	1.08931e-07	2.72328e-08	1.52432e-06
GOTERM_MF_3	GO:0017076~purine nucleotide binding	146	6.92928	3.41523e-09	K06H7.8, C18H7.4, ZK666.8, C44C10.4, F26A1.3, TAG-191, R10D12.10, F01D4.3, W09C3.1, C03C10.2, C14A4.13, W06F12.3, C27D8.1, ABT-5, F54H5.2, W03F8.2, ABT-1, F26E4.5, ZK596.2, W03A5.1, C09B9.4, ZC581.7, F57B9.8, OLD-1, R13H9.6, R13H9.5, M7.7, ZC581.2, F26A1.4, KIN-21, KIN-24, F22B3.8, C27D6.11, MEC-7, T19D12.5, B0207.7, C56C10.6, GCY-22, Y47G6A.13, ACDH-5, Y69E1A.3, H05L14.1, ACDH-7, ACDH-8, F21F3.2…	567	1187	7243	1.57122	2.56142e-07	5.12284e-08	3.58429e-06
PIR_SUPERFAMILY	PIRSF038285:cuticle collagen	26	1.23398	9.15303e-09	COL-58, COL-180, DPY-7, COL-97, COL-175, COL-3, COL-117, COL-79, COL-77, COL-7, COL-133, COL-10, COL-13, COL-49, COL-12, BLI-2, COL-145, COL-165, COL-85, COL-60, COL-129, COL-88, COL-104, COL-107, SQT-3, COL-101, COL-14	448	73	4541	3.61014	2.38894e-06	1.19447e-06	1.19712e-05
GOTERM_MF_2	GO:0001882~nucleoside binding	134	6.35975	1.48219e-08	K06H7.8, C18H7.4, ZK666.8, C44C10.4, F26A1.3, TAG-191, R10D12.10, F01D4.3, W09C3.1, C03C10.2, C14A4.13, W06F12.3, C27D8.1, ABT-5, F54H5.2, W03F8.2, ABT-1, F26E4.5, ZK596.2, W03A5.1, C09B9.4, ZC581.7, F57B9.8, OLD-1, R13H9.6, R13H9.5, ZC581.2, M7.7, F26A1.4, KIN-21, KIN-24, F22B3.8, C27D6.11, T19D12.5, B0207.7, C56C10.6, GCY-22, Y47G6A.13, ACDH-5, Y69E1A.3, H05L14.1, ACDH-7, ACDH-8, F21F3.2, KIN-5…	734	1017	8884	1.59476	6.07699e-07	1.51925e-07	1.36402e-05
UP_SEQ_FEATURE	signal peptide	56	2.65781	1.97791e-08	CRN-6, HIM-4, LET-268, ACN-1, B0228.1, INS-23, DPY-7, INS-7, F02A9.1, CLEC-160, PXN-1, COL-7, C03G6.5, INS-6, COL-10, COL-13, COL-12, ABF-2, C08F11.12, FLP-13, LON-1, BLI-1, NAS-38, INS-22, COL-145, K07C11.7, SPE-27, SQT-3, TAG-209, ZK262.3, FAR-1, ASM-2, C27B7.7, DAF-7, T09B9.3, NAS-25, GLR-2, PAT-2, FLP-3, FLP-1, B0416.2, F37H8.5, NAS-6, Y73F4A.2, Y45F10C.4, Y45F10C.2, ZK1290.11, VIT-1, ACR-7, …	204	422	3249	2.11347	8.18853e-06	4.09427e-06	2.77261e-05
GOTERM_MF_4	GO:0030554~adenyl nucleotide binding	134	6.35975	3.96486e-08	K06H7.8, C18H7.4, ZK666.8, C44C10.4, F26A1.3, TAG-191, R10D12.10, F01D4.3, W09C3.1, C03C10.2, C14A4.13, W06F12.3, C27D8.1, ABT-5, F54H5.2, W03F8.2, ABT-1, F26E4.5, ZK596.2, W03A5.1, C09B9.4, ZC581.7, F57B9.8, OLD-1, R13H9.6, R13H9.5, ZC581.2, M7.7, F26A1.4, KIN-21, KIN-24, F22B3.8, C27D6.11, T19D12.5, B0207.7, C56C10.6, GCY-22, Y47G6A.13, ACDH-5, Y69E1A.3, H05L14.1, ACDH-7, ACDH-8, F21F3.2, KIN-5…	527	1009	6132	1.54527	3.52872e-06	8.8218e-07	4.30397e-05
PIR_SUPERFAMILY	PIRSF000675:tyrosine-protein kinase	12	0.56953	5.34969e-08	R11E3.1, C35E7.10, C55C3.4, ZK622.1, SPE-8, F59A3.8, W03F8.2, ZC581.7, F26E4.5, F22B3.8, KIN-5, C25A8.5	448	17	4541	7.15494	1.39626e-05	4.65422e-06	6.99683e-05
INTERPRO	IPR014044:SCP-like extracellular	16	0.759374	5.42008e-08	SCL-14, SCL-15, SCL-25, SCL-17, SCL-23, SCL-24, SCL-21, LON-1, D2062.1, SCL-5, SCL-6, C07A4.3, SCL-7, SCL-8, VAP-1, SCL-3	1253	33	13633	5.27529	3.73978e-05	1.96834e-06	8.15806e-05
INTERPRO	IPR001283:Allergen V5/Tpx-1 related	16	0.759374	8.87802e-08	SCL-14, SCL-15, SCL-25, SCL-17, SCL-23, SCL-24, SCL-21, LON-1, D2062.1, SCL-5, SCL-6, C07A4.3, SCL-7, SCL-8, VAP-1, SCL-3	1253	34	13633	5.12014	6.12565e-05	3.06291e-06	0.000133628
SP_PIR_KEYWORDS	collagen	30	1.42383	9.6826e-08	COL-58, DPY-7, COL-139, COL-175, COL-71, COL-3, COL-117, COL-79, COL-74, COL-7, COL-10, COL-13, COL-49, COL-12, BLI-1, COL-145, COL-109, COL-165, COL-167, COL-104, COL-88, COL-141, COL-166, COL-169, COL-143, COL-168, COL-107, SQT-3, COL-101, COL-43, COL-14	2048	97	19674	2.97107	1.76222e-05	8.81113e-06	0.000119485
SP_PIR_KEYWORDS	cytoskeleton	35	1.66113	1.04486e-07	F38H4.6, MSP-31, Y48B6A.5, MSP-33, MSP-36, MSP-38, MSP-113, C15H11.1, F54H5.3, MSP-3, C10H11.7, C35E7.9, F13A7.1, MSP-40, MSP-152, T22B3.3, W03D8.5, Y53F4B.19, SPE-26, F21H7.5, MSP-142, F42A9.7, C14A4.8, F57A10.2, MSP-56, MSP-57, MSP-59, F36D3.4, MSP-53, MSP-19, MSP-55, DCT-9, F58A6.9, MSP-10, ZK546.3, F36H12.3, MSP-64, MSP-63, MSP-65, F52F12.8, ZK354.7, MSP-45, F58E6.5, T05D4.5, C35A5.4, K05F1.9…	2048	125	19674	2.6898	1.90164e-05	6.33883e-06	0.000128938
GOTERM_MF_5	GO:0032559~adenyl ribonucleotide binding	130	6.16991	1.05865e-07	K06H7.8, C18H7.4, ZK666.8, C44C10.4, F26A1.3, TAG-191, R10D12.10, F01D4.3, W09C3.1, C03C10.2, C14A4.13, W06F12.3, C27D8.1, ABT-5, F54H5.2, W03F8.2, ABT-1, F26E4.5, ZK596.2, W03A5.1, C09B9.4, ZC581.7, F57B9.8, OLD-1, R13H9.6, R13H9.5, ZC581.2, M7.7, F26A1.4, KIN-21, KIN-24, F22B3.8, C27D6.11, T19D12.5, B0207.7, C56C10.6, GCY-22, Y47G6A.13, Y69E1A.3, H05L14.1, F21F3.2, KIN-5, KLP-17, T06C10.3, Y65B…	449	944	4951	1.51851	9.63364e-06	3.21122e-06	0.000115413
SMART	SM00198:SCP	16	0.759374	1.45404e-07	SCL-14, SCL-15, SCL-25, SCL-17, SCL-23, SCL-24, SCL-21, LON-1, D2062.1, SCL-5, SCL-6, C07A4.3, SCL-7, SCL-8, VAP-1, SCL-3	532	34	5537	4.89783	1.86115e-05	2.65881e-06	0.000168862
GOTERM_CC_5	GO:0005856~cytoskeleton	48	2.27812	2.4393e-07	F38H4.6, MSP-31, Y48B6A.5, MSP-33, MSP-36, MSP-38, MEC-12, MSP-113, C15H11.1, TBA-8, F54H5.3, MSP-3, C10H11.7, C35E7.9, TBB-6, MSP-40, F13A7.1, MSP-152, IFP-1, T22B3.3, PTL-1, W03D8.5, Y53F4B.19, Y113G7C.1, DLC-4, DLC-6, SPE-26, F21H7.5, MSP-142, F42A9.7, MEC-7, F57A10.2, MSP-56, MSP-57, MLC-2, MAX-1, MSP-59, F36D3.4, MSP-53, MSP-19, MSP-55, F58A6.9, MSP-10, ZK546.3, F36H12.3, IFA-4, MSP-64, MSP-…	815	235	8803	2.20621	2.09777e-05	6.99263e-06	0.000263037
GOTERM_CC_4	GO:0005856~cytoskeleton	48	2.27812	2.58829e-07	F38H4.6, MSP-31, Y48B6A.5, MSP-33, MSP-36, MSP-38, MEC-12, MSP-113, C15H11.1, TBA-8, F54H5.3, MSP-3, C10H11.7, C35E7.9, TBB-6, MSP-40, F13A7.1, MSP-152, IFP-1, T22B3.3, PTL-1, W03D8.5, Y53F4B.19, Y113G7C.1, DLC-4, DLC-6, SPE-26, F21H7.5, MSP-142, F42A9.7, MEC-7, F57A10.2, MSP-56, MSP-57, MLC-2, MAX-1, MSP-59, F36D3.4, MSP-53, MSP-19, MSP-55, F58A6.9, MSP-10, ZK546.3, F36H12.3, IFA-4, MSP-64, MSP-…	819	235	8829	2.20192	2.35531e-05	5.88834e-06	0.000282173
INTERPRO	IPR016638:Uncharacterised protein family UPF0376	15	0.711913	2.72915e-07	T20D4.15, F35F10.13, C36C5.12, C04E12.2, C36C5.14, C36C5.15, C04E12.4, W10G11.3, T28A11.3, T28A11.19, T20D4.10, T28A11.16, T20D4.11, C17B7.3, T20D4.12, C03G6.5	1253	32	13633	5.10013	0.000188293	8.96716e-06	0.000410779
GOTERM_MF_4	GO:0032555~purine ribonucleotide binding	141	6.69198	4.50729e-07	K06H7.8, C18H7.4, ZK666.8, C44C10.4, F26A1.3, TAG-191, R10D12.10, F01D4.3, W09C3.1, C03C10.2, C14A4.13, W06F12.3, C27D8.1, ABT-5, F54H5.2, W03F8.2, ABT-1, F26E4.5, ZK596.2, W03A5.1, C09B9.4, ZC581.7, F57B9.8, OLD-1, R13H9.6, R13H9.5, ZC581.2, M7.7, F26A1.4, KIN-21, KIN-24, F22B3.8, C27D6.11, MEC-7, T19D12.5, B0207.7, C56C10.6, GCY-22, Y47G6A.13, Y69E1A.3, H05L14.1, F21F3.2, KIN-5, KLP-17, T06C10.…	527	1120	6132	1.46485	4.01141e-05	8.02295e-06	0.000489279
GOTERM_CC_1	GO:0005576~extracellular region	57	2.70527	4.70385e-07	INS-28, INS-23, INS-26, INS-7, INS-33, CLEC-160, GPN-1, PXN-1, C03G6.5, INS-6, INS-19, C08F11.12, FLP-13, LON-1, NAS-38, INS-22, DAF-28, SQT-3, ZK262.3, FAR-1, VAP-1, COL-14, ZMP-1, ASM-2, SCL-25, C27B7.7, SCL-23, SCL-24, SCL-21, DAF-7, C06A8.6, T19D2.1, NAS-25, FLP-3, FLP-1, SCL-5, SCL-6, C07A4.3, SCL-7, SCL-8, F37H8.5, SCL-3, NAS-6, SCL-14, SCL-15, SCL-17, Y73F4A.2, T01D3.3, INS-37, Y45F10C.4, …	883	311	9662	2.00549	5.17423e-06	5.17423e-06	0.000293025
PIR_SUPERFAMILY	PIRSF015697:UCP015697	15	0.711913	5.8573e-07	T20D4.15, F35F10.13, C36C5.12, C04E12.2, C36C5.14, C36C5.15, C04E12.4, W10G11.3, T28A11.3, T28A11.19, T20D4.10, T28A11.16, T20D4.11, C17B7.3, T20D4.12, C03G6.5	448	32	4541	4.75133	0.000152864	3.82182e-05	0.000766069
INTERPRO	IPR009658:Protein of unknown function DUF1248	9	0.427148	6.34731e-07	F22B5.5, C28D4.7, ZK1248.5, C28D4.8, C28D4.5, C28D4.4, F36D3.8, K08A2.2, T09F5.10	1253	11	13633	8.90205	0.000437869	1.99073e-05	0.000955366
INTERPRO	IPR002213:UDP-glucuronosyl/UDP-glucosyltransferase	24	1.13906	7.59998e-07	K02E11.3, Y73B6A.3, UGT-49, UGT-16, UGT-19, UGT-42, UGT-32, UGT-21, UGT-11, UGT-30, UGT-2, UGT-13, UGT-54, UGT-63, UGT-25, UGT-36, UGT-47, UGT-4, T19H12.3, K02E11.6, UGT-40, UGT-8, F54C1.1, UGT-7	1253	82	13633	3.18447	0.000524261	2.27997e-05	0.00114391
GOTERM_MF_2	GO:0030246~carbohydrate binding	36	1.70859	8.26586e-07	CLEC-85, CLEC-160, UGT-25, CLEC-86, UGT-47, C09F9.2, CLEC-166, CLEC-165, UGT-40, F54C1.1, CLEC-43, Y73F4A.3, Y73F4A.2, CLEC-10, UGT-16, CLEC-117, CLEC-80, CLEC-139, AMAN-3, CLEC-136, CLEC-137, UGT-11, UGT-30, CLEC-170, UGT-2, UGT-13, UGT-54, CLEC-72, UGT-36, CLEC-73, UGT-4, CLEC-52, CLEC-51, CLEC-79, UGT-8, UGT-7	734	177	8884	2.46174	3.38895e-05	6.77799e-06	0.000760679
INTERPRO	IPR017442:Serine/threonine protein kinase-related	50	2.37304	1.49477e-06	K06H7.8, Y69F12A.1, C05C12.1, C25H3.1, ZK666.8, F26A1.3, TAG-191, T05C12.1, C03C10.2, W09C3.1, W06F12.3, C27D8.1, F54H5.2, W02B12.12, B0218.5, ZK596.2, F38E1.3, W03G9.5, GSKA-3, W01B6.2, F35C11.3, Y39G8B.5, M05D6.1, R13H9.6, R13H9.5, M7.7, GCY-11, F53C3.1, Y38H8A.4, C27D6.11, T19D12.5, B0207.7, C56C10.6, Y47G6A.13, C08F8.6, D2045.5, T15B12.2, F41G3.5, C04G2.2, F21F3.2, F36H12.9, ZK354.6, M04F3.3,…	1253	265	13633	2.05288	0.00103086	4.29738e-05	0.00224984
GOTERM_MF_FAT	GO:0005524~ATP binding	130	6.16991	2.62128e-06	K06H7.8, C18H7.4, ZK666.8, C44C10.4, F26A1.3, TAG-191, R10D12.10, F01D4.3, W09C3.1, C03C10.2, C14A4.13, W06F12.3, C27D8.1, ABT-5, F54H5.2, W03F8.2, ABT-1, F26E4.5, ZK596.2, W03A5.1, C09B9.4, ZC581.7, F57B9.8, OLD-1, R13H9.6, R13H9.5, ZC581.2, M7.7, F26A1.4, KIN-21, KIN-24, F22B3.8, C27D6.11, T19D12.5, B0207.7, C56C10.6, GCY-22, Y47G6A.13, Y69E1A.3, H05L14.1, F21F3.2, KIN-5, KLP-17, T06C10.3, Y65B…	632	942	6686	1.45996	0.000854173	9.49441e-05	0.00354713
GOTERM_MF_FAT	GO:0032559~adenyl ribonucleotide binding	130	6.16991	2.97167e-06	K06H7.8, C18H7.4, ZK666.8, C44C10.4, F26A1.3, TAG-191, R10D12.10, F01D4.3, W09C3.1, C03C10.2, C14A4.13, W06F12.3, C27D8.1, ABT-5, F54H5.2, W03F8.2, ABT-1, F26E4.5, ZK596.2, W03A5.1, C09B9.4, ZC581.7, F57B9.8, OLD-1, R13H9.6, R13H9.5, ZC581.2, M7.7, F26A1.4, KIN-21, KIN-24, F22B3.8, C27D6.11, T19D12.5, B0207.7, C56C10.6, GCY-22, Y47G6A.13, Y69E1A.3, H05L14.1, F21F3.2, KIN-5, KLP-17, T06C10.3, Y65B…	632	944	6686	1.45687	0.000968295	9.68717e-05	0.00402127
INTERPRO	IPR008574:Protein of unknown function DUF856, Caenorhabditis species	7	0.332226	3.82822e-06	T16A9.5, F58A6.5, Y37D8A.5, W03D8.9, K06A5.2, Y69E1A.1, W03D8.10	1253	7	13633	10.8803	0.00263799	0.000105654	0.00576192
INTERPRO	IPR004296:Protein of unknown function DUF236	9	0.427148	4.18264e-06	C47E12.10, C04F12.6, C03C11.1, F27C1.3, ZC376.8, F47B3.4, C36F7.5, K07A1.5, R08A2.1	1253	13	13633	7.53251	0.00288187	0.000110995	0.00629534
PIR_SUPERFAMILY	PIRSF015697:uncharacterized protein	13	0.616991	5.00811e-06	T20D4.15, F35F10.13, C36C5.12, W10G11.3, T28A11.3, T28A11.19, T20D4.10, T28A11.16, T20D4.11, K10C9.9, T20D4.12, C17B7.3, C03G6.5	448	28	4541	4.70607	0.00130627	0.00026139	0.00654987
INTERPRO	IPR005514:Protein of unknown function DUF316	11	0.522069	5.64372e-06	C46E10.1, D1081.3, Y47H9B.2, R01H2.2, F15H9.1, F35E2.5, Y116A8A.4, F35E2.9, TRY-8, TRY-7, Y116A8A.6	1253	21	13633	5.6992	0.00388661	0.000144218	0.00849435
PIR_SUPERFAMILY	PIRSF016383:DUF856_CAE_spp	7	0.332226	5.66289e-06	T16A9.5, F58A6.5, Y37D8A.5, W03D8.9, K06A5.2, Y69E1A.1, W03D8.10	448	7	4541	10.1362	0.00147693	0.000246306	0.0074062
GOTERM_BP_5	GO:0030259~lipid glycosylation	14	0.664452	6.6488e-06	UGT-16, UGT-11, UGT-30, UGT-2, UGT-13, UGT-54, UGT-36, UGT-25, UGT-47, UGT-4, UGT-8, F54C1.1, UGT-40, UGT-7	480	44	6749	4.47377	0.00225805	0.000452018	0.00905385
GOTERM_BP_FAT	GO:0030259~lipid glycosylation	14	0.664452	1.08445e-05	UGT-16, UGT-11, UGT-30, UGT-2, UGT-13, UGT-54, UGT-36, UGT-25, UGT-47, UGT-4, UGT-8, F54C1.1, UGT-40, UGT-7	582	44	7838	4.28507	0.00676573	0.00113081	0.0161083
GOTERM_CC_FAT	GO:0005856~cytoskeleton	48	2.27812	1.38697e-05	F38H4.6, MSP-31, Y48B6A.5, MSP-33, MSP-36, MSP-38, MEC-12, MSP-113, C15H11.1, TBA-8, F54H5.3, MSP-3, C10H11.7, C35E7.9, TBB-6, MSP-40, F13A7.1, MSP-152, IFP-1, T22B3.3, PTL-1, W03D8.5, Y53F4B.19, Y113G7C.1, DLC-4, DLC-6, SPE-26, F21H7.5, MSP-142, F42A9.7, MEC-7, F57A10.2, MSP-56, MSP-57, MLC-2, MAX-1, MSP-59, F36D3.4, MSP-53, MSP-19, MSP-55, F58A6.9, MSP-10, ZK546.3, F36H12.3, IFA-4, MSP-64, MSP-…	847	235	7912	1.90799	0.0016353	0.0016353	0.0158719
INTERPRO	IPR008498:Protein of unknown function DUF780, Caenorhabditis species	7	0.332226	1.41148e-05	NSPD-7, NSPD-6, NSPD-5, NSPD-4, NSPD-9, NSPD-10, NSPD-1, NSPD-2, NSPD-3	1253	8	13633	9.52025	0.00969202	0.000347771	0.0212429
GOTERM_MF_FAT	GO:0030554~adenyl nucleotide binding	134	6.35975	1.422e-05	K06H7.8, C18H7.4, ZK666.8, C44C10.4, F26A1.3, TAG-191, R10D12.10, F01D4.3, W09C3.1, C03C10.2, C14A4.13, W06F12.3, C27D8.1, ABT-5, F54H5.2, W03F8.2, ABT-1, F26E4.5, ZK596.2, W03A5.1, C09B9.4, ZC581.7, F57B9.8, OLD-1, R13H9.6, R13H9.5, ZC581.2, M7.7, F26A1.4, KIN-21, KIN-24, F22B3.8, C27D6.11, T19D12.5, B0207.7, C56C10.6, GCY-22, Y47G6A.13, ACDH-5, Y69E1A.3, H05L14.1, ACDH-7, ACDH-8, F21F3.2, KIN-5…	632	1009	6686	1.40496	0.00462502	0.000421343	0.0192412
GOTERM_MF_FAT	GO:0001883~purine nucleoside binding	134	6.35975	1.47951e-05	K06H7.8, C18H7.4, ZK666.8, C44C10.4, F26A1.3, TAG-191, R10D12.10, F01D4.3, W09C3.1, C03C10.2, C14A4.13, W06F12.3, C27D8.1, ABT-5, F54H5.2, W03F8.2, ABT-1, F26E4.5, ZK596.2, W03A5.1, C09B9.4, ZC581.7, F57B9.8, OLD-1, R13H9.6, R13H9.5, ZC581.2, M7.7, F26A1.4, KIN-21, KIN-24, F22B3.8, C27D6.11, T19D12.5, B0207.7, C56C10.6, GCY-22, Y47G6A.13, ACDH-5, Y69E1A.3, H05L14.1, ACDH-7, ACDH-8, F21F3.2, KIN-5…	632	1010	6686	1.40357	0.00481162	0.000401855	0.0200193
GOTERM_MF_FAT	GO:0030246~carbohydrate binding	36	1.70859	1.58573e-05	CLEC-85, CLEC-160, UGT-25, CLEC-86, UGT-47, C09F9.2, CLEC-166, CLEC-165, UGT-40, F54C1.1, CLEC-43, Y73F4A.3, Y73F4A.2, CLEC-10, UGT-16, CLEC-117, CLEC-80, CLEC-139, AMAN-3, CLEC-136, CLEC-137, UGT-11, UGT-30, CLEC-170, UGT-2, UGT-13, UGT-54, CLEC-72, UGT-36, CLEC-73, UGT-4, CLEC-52, CLEC-51, CLEC-79, UGT-8, UGT-7	632	177	6686	2.15168	0.00515619	0.000397577	0.0214564
GOTERM_BP_2	GO:0044238~primary metabolic process	280	13.289	1.98551e-05	Y71H2AM.25, LYS-5, TAG-191, R10D12.10, ZK484.7, C31H1.5, DPF-2, Y19D10B.6, C14A4.13, Y51A2B.4, C27D8.1, F54H5.2, T22C1.8, HDL-1, LYS-7, W03A5.1, C09B9.4, C07E3.4, R03G8.4, F57B9.8, F42C5.5, F55H12.5, OLD-1, T19D7.7, NAS-38, M7.7, PAF-1, UGT-2, KIN-21, UGT-54, KIN-24, ZK262.3, LYS-10, UGT-4, ZMP-1, C27D6.11, F55D12.6, UGT-8, UGT-7, T19D12.5, B0207.7, GLT-5, C56C10.6, C08F11.7, T19D2.1, NAS-25, R09…	613	3059	8116	1.21188	0.00198356	0.00198356	0.0220356
INTERPRO	IPR002542:Protein of unknown function DUF19	16	0.759374	2.00849e-05	T20D4.15, F35F10.13, C36C5.12, C04E12.2, C36C5.14, C36C5.15, C04E12.4, W10G11.3, T28A11.3, T28A11.19, T20D4.10, T28A11.16, T20D4.11, C17B7.3, K10C9.9, T20D4.12, C03G6.5	1253	49	13633	3.55275	0.0137631	0.000477773	0.0302267
GOTERM_MF_FAT	GO:0001882~nucleoside binding	134	6.35975	2.13028e-05	K06H7.8, C18H7.4, ZK666.8, C44C10.4, F26A1.3, TAG-191, R10D12.10, F01D4.3, W09C3.1, C03C10.2, C14A4.13, W06F12.3, C27D8.1, ABT-5, F54H5.2, W03F8.2, ABT-1, F26E4.5, ZK596.2, W03A5.1, C09B9.4, ZC581.7, F57B9.8, OLD-1, R13H9.6, R13H9.5, ZC581.2, M7.7, F26A1.4, KIN-21, KIN-24, F22B3.8, C27D6.11, T19D12.5, B0207.7, C56C10.6, GCY-22, Y47G6A.13, ACDH-5, Y69E1A.3, H05L14.1, ACDH-7, ACDH-8, F21F3.2, KIN-5…	632	1017	6686	1.3939	0.00692071	0.000495932	0.0288236
GOTERM_BP_1	GO:0008152~metabolic process	348	16.5164	4.6932e-05	Y71H2AM.25, LYS-5, TAG-191, R10D12.10, ZK484.7, C31H1.5, DPF-2, Y19D10B.6, C14A4.13, Y51A2B.4, C27D8.1, E04F6.4, F54H5.2, UGT-63, T22C1.8, LYS-7, HDL-1, W03A5.1, K02E11.6, C09B9.4, C07E3.4, R03G8.4, F42C5.5, F57B9.8, F55H12.5, OLD-1, T19D7.7, NAS-38, M7.7, CYC-2.2, PAF-1, UGT-2, KIN-21, UGT-54, KIN-24, SUL-3, ZK262.3, LYS-10, UGT-4, C27D6.11, ZMP-1, F55D12.6, UGT-8, UGT-7, T19D12.5, DAF-9, B0207.…	673	3776	8513	1.16578	0.000797545	0.000797545	0.0339762
SP_PIR_KEYWORDS	phosphoric monoester hydrolase	13	0.616991	4.79932e-05	F58G1.3, T16G12.7, R08C7.8, F42G8.8, ZK938.1, GSP-4, Y69E1A.4, C47A4.3, F49E11.7, C34D4.2, Y105C5B.3, F52H3.6, Y40H4A.2	2048	32	19674	3.90262	0.00869693	0.00218136	0.0592085
GOTERM_MF_2	GO:0000166~nucleotide binding	152	7.21405	5.30314e-05	K06H7.8, C18H7.4, ZK666.8, C44C10.4, F26A1.3, TAG-191, R10D12.10, CPB-2, F01D4.3, W09C3.1, C03C10.2, C14A4.13, W06F12.3, C27D8.1, ABT-5, F54H5.2, W03F8.2, ABT-1, F26E4.5, ZK596.2, W03A5.1, C09B9.4, ZC581.7, F57B9.8, OLD-1, R13H9.6, R13H9.5, M7.7, ZC581.2, F26A1.4, KIN-21, KIN-24, F22B3.8, C27D6.11, MEC-7, T19D12.5, B0207.7, C56C10.6, GCY-22, Y47G6A.13, ACDH-5, Y69E1A.3, H05L14.1, ACDH-7, ACDH-8, …	734	1369	8884	1.34386	0.00217198	0.000362325	0.0487925
GOTERM_CC_FAT	GO:0005576~extracellular region	57	2.70527	5.32853e-05	INS-28, INS-23, INS-26, INS-7, INS-33, CLEC-160, GPN-1, PXN-1, C03G6.5, INS-6, INS-19, C08F11.12, FLP-13, LON-1, NAS-38, INS-22, DAF-28, SQT-3, ZK262.3, FAR-1, VAP-1, COL-14, ZMP-1, ASM-2, SCL-25, C27B7.7, SCL-23, SCL-24, SCL-21, DAF-7, C06A8.6, T19D2.1, NAS-25, FLP-3, FLP-1, SCL-5, SCL-6, C07A4.3, SCL-7, SCL-8, F37H8.5, SCL-3, NAS-6, SCL-14, SCL-15, SCL-17, Y73F4A.2, T01D3.3, INS-37, Y45F10C.4, …	847	311	7912	1.71205	0.00626811	0.00313898	0.0609648
COG_ONTOLOGY	Defense mechanisms	10	0.474608	5.54083e-05	PGP-13, PGP-7, PGP-14, PGP-4, ABT-5, PGP-8, CFT-1, LACT-1, LACT-2, PGP-3	73	30	1118	5.10502	0.00116293	0.00116293	0.0427748
INTERPRO	IPR002413:Ves allergen	9	0.427148	5.64549e-05	SCL-14, SCL-15, SCL-23, SCL-5, SCL-6, SCL-7, SCL-8, VAP-1, SCL-3	1253	17	13633	5.76015	0.038206	0.00129766	0.0849398
INTERPRO	IPR006588:Protein of unknown function PAW	10	0.474608	7.43723e-05	F35F10.1, F35F10.4, W04G5.4, T20D4.5, C04E12.10, C04E12.2, T20D4.3, C17B7.5, T20D4.13, C04E12.4, Y50D4B.4	1253	22	13633	4.94559	0.0500242	0.00165408	0.111884
SMART	SM00613:PAW	10	0.474608	0.00010174	F35F10.1, F35F10.4, W04G5.4, T20D4.5, C04E12.10, C04E12.2, T20D4.3, C17B7.5, T20D4.13, C04E12.4, Y50D4B.4	532	22	5537	4.73086	0.0129389	0.0016266	0.11809
GOTERM_MF_FAT	GO:0032553~ribonucleotide binding	141	6.69198	0.000119755	K06H7.8, C18H7.4, ZK666.8, C44C10.4, F26A1.3, TAG-191, R10D12.10, F01D4.3, W09C3.1, C03C10.2, C14A4.13, W06F12.3, C27D8.1, ABT-5, F54H5.2, W03F8.2, ABT-1, F26E4.5, ZK596.2, W03A5.1, C09B9.4, ZC581.7, F57B9.8, OLD-1, R13H9.6, R13H9.5, ZC581.2, M7.7, F26A1.4, KIN-21, KIN-24, F22B3.8, C27D6.11, MEC-7, T19D12.5, B0207.7, C56C10.6, GCY-22, Y47G6A.13, Y69E1A.3, H05L14.1, F21F3.2, KIN-5, KLP-17, T06C10.…	632	1120	6686	1.33183	0.0382902	0.00259945	0.161934
GOTERM_MF_FAT	GO:0032555~purine ribonucleotide binding	141	6.69198	0.000119755	K06H7.8, C18H7.4, ZK666.8, C44C10.4, F26A1.3, TAG-191, R10D12.10, F01D4.3, W09C3.1, C03C10.2, C14A4.13, W06F12.3, C27D8.1, ABT-5, F54H5.2, W03F8.2, ABT-1, F26E4.5, ZK596.2, W03A5.1, C09B9.4, ZC581.7, F57B9.8, OLD-1, R13H9.6, R13H9.5, ZC581.2, M7.7, F26A1.4, KIN-21, KIN-24, F22B3.8, C27D6.11, MEC-7, T19D12.5, B0207.7, C56C10.6, GCY-22, Y47G6A.13, Y69E1A.3, H05L14.1, F21F3.2, KIN-5, KLP-17, T06C10.…	632	1120	6686	1.33183	0.0382902	0.00259945	0.161934
UP_SEQ_FEATURE	region of interest:Triple-helical region	10	0.474608	0.000125767	COL-145, COL-10, COL-13, COL-12, SQT-3, COL-79, COL-14, BLI-1, COL-7, DPY-7	204	33	3249	4.8262	0.0507383	0.0172071	0.176154
KEGG_PATHWAY	cel00380:Tryptophan metabolism	8	0.379687	0.000141401	CYP-33E2, NIT-1, ECH-9, ECH-7, HDL-1, T02G5.4, CYP-33C8, F54C8.1	52	37	1534	6.37838	0.00760709	0.00760709	0.138438
PIR_SUPERFAMILY	PIRSF019652:major sperm protein	6	0.284765	0.000160597	MSP-56, MSP-31, MSP-57, MSP-45, MSP-33, MSP-59, MSP-53, MSP-19, MSP-36, MSP-55, MSP-38, MSP-81, MSP-113, MSP-49, F58A6.9, MSP-10, ZK546.3, MSP-79, MSP-78, MSP-64, MSP-77, MSP-63, MSP-76, MSP-3, MSP-65, MSP-51, MSP-50, MSP-142, MSP-40, MSP-152	448	7	4541	8.68814	0.0410527	0.00597056	0.20984
INTERPRO	IPR002900:Protein of unknown function DUF38, Caenorhabditis species	39	1.85097	0.000198198	FBXA-89, T08E11.1, FBXA-157, FBXA-223, FBXA-155, FBXA-61, FBXA-202, FBXA-136, FBXA-135, T08E11.8, FBXA-27, FBXA-196, Y20C6A.1, FBXA-134, FBXA-224, FBXA-158, F47H4.2, FBXA-44, T06E6.15, Y70C5A.3, F31E9.3, C17C3.5, K10G4.5, FBXA-74, FBXA-104, FBXA-162, FBXA-125, FBXA-163, FBXA-30, FBXA-53, F58E2.4, FBXA-185, C52E2.4, FBXA-39, FBXA-188, FBXA-55, FBXA-189, FBXA-166, C52E2.5	1253	227	13633	1.8693	0.127829	0.00426494	0.297903
GOTERM_BP_2	GO:0043170~macromolecule metabolic process	219	10.3939	0.000220126	Y71H2AM.25, LYS-5, TAG-191, R10D12.10, ZK484.7, DPF-2, Y19D10B.6, C14A4.13, C27D8.1, F54H5.2, T22C1.8, W03A5.1, C09B9.4, C07E3.4, R03G8.4, F57B9.8, F42C5.5, OLD-1, F55H12.5, NAS-38, M7.7, KIN-21, KIN-24, ZMP-1, C27D6.11, F55D12.6, T19D12.5, B0207.7, GLT-5, C56C10.6, C08F11.7, NAS-25, T19D2.1, R09E10.9, C33H5.16, TTLL-15, K09F6.3, T25D3.3, C46A5.1, T04F3.3, Y54F10BM.3, F21F3.2, Y69A2AR.19, B0207.1…	613	2372	8116	1.22239	0.0217745	0.0109472	0.244054
GOTERM_BP_5	GO:0030258~lipid modification	14	0.664452	0.000231449	UGT-16, UGT-11, UGT-30, UGT-2, UGT-13, UGT-54, UGT-36, UGT-25, UGT-47, UGT-4, UGT-8, F54C1.1, UGT-40, UGT-7	480	60	6749	3.28076	0.0756843	0.0130313	0.314723
GOTERM_MF_FAT	GO:0017076~purine nucleotide binding	146	6.92928	0.000272696	K06H7.8, C18H7.4, ZK666.8, C44C10.4, F26A1.3, TAG-191, R10D12.10, F01D4.3, W09C3.1, C03C10.2, C14A4.13, W06F12.3, C27D8.1, ABT-5, F54H5.2, W03F8.2, ABT-1, F26E4.5, ZK596.2, W03A5.1, C09B9.4, ZC581.7, F57B9.8, OLD-1, R13H9.6, R13H9.5, M7.7, ZC581.2, F26A1.4, KIN-21, KIN-24, F22B3.8, C27D6.11, MEC-7, T19D12.5, B0207.7, C56C10.6, GCY-22, Y47G6A.13, ACDH-5, Y69E1A.3, H05L14.1, ACDH-7, ACDH-8, F21F3.2…	632	1187	6686	1.30122	0.0850732	0.00554154	0.368391
GOTERM_CC_3	GO:0031143~pseudopodium	5	0.237304	0.000281868	MSP-56, MSP-31, MSP-57, MSP-45, MSP-33, MSP-59, MSP-53, MSP-19, MSP-36, MSP-55, MSP-38, MSP-81, MSP-113, MSP-49, F58A6.9, MSP-10, MSP-79, MSP-78, MSP-64, MSP-77, MSP-63, MSP-76, MSP-3, MSP-65, MSP-51, MSP-50, MSP-142, MSP-40, MSP-152	837	5	9458	11.2999	0.0198165	0.00499137	0.29217
SP_PIR_KEYWORDS	serine/threonine-specific phosphatase	10	0.474608	0.000294767	F49E11.7, F58G1.3, C34D4.2, T16G12.7, F42G8.8, ZK938.1, F52H3.6, GSP-4, Y69E1A.4, Y40H4A.2	2048	23	19674	4.17672	0.0522415	0.0106737	0.363142
KEGG_PATHWAY	cel00071:Fatty acid metabolism	9	0.427148	0.000313088	CYP-33E2, ECH-9, ACDH-7, ACDH-8, ECH-7, T02G5.4, CYP-33C8, F54C8.1, ACS-2	52	55	1534	4.82727	0.0167672	0.00841906	0.306296
GOTERM_BP_4	GO:0030258~lipid modification	14	0.664452	0.000325672	UGT-16, UGT-11, UGT-30, UGT-2, UGT-13, UGT-54, UGT-36, UGT-25, UGT-47, UGT-4, UGT-8, F54C1.1, UGT-40, UGT-7	565	60	7683	3.17292	0.110937	0.023243	0.446537
SP_PIR_KEYWORDS	iron	38	1.80351	0.000337808	C27B7.6, DAF-9, Y71G12B.30, T16G12.7, CYP-13A7, LET-268, GSP-3, GSP-4, C06A1.3, R08A2.2, Y69E1A.4, CYP-33E2, F49E11.7, CYP-14A2, F23B12.1, FAT-5, F52H3.6, CYP-33C8, PXN-1, CYP-14A3, Y40H4A.2, C23G10.1, F58G1.3, Y54G2A.24, CYP-34A4, CYP-34A10, CYP-13A10, CYP-25A1, F42G8.8, GCY-34, ZK938.1, C47A4.3, CYC-2.2, C34D4.2, T25B9.2, Y105C5B.3, CYP-29A4, R13A5.11	2048	199	19674	1.8344	0.0596391	0.0101963	0.416065
GOTERM_CC_4	GO:0031143~pseudopodium	5	0.237304	0.000338962	MSP-56, MSP-31, MSP-57, MSP-45, MSP-33, MSP-59, MSP-53, MSP-19, MSP-36, MSP-55, MSP-38, MSP-81, MSP-113, MSP-49, F58A6.9, MSP-10, MSP-79, MSP-78, MSP-64, MSP-77, MSP-63, MSP-76, MSP-3, MSP-65, MSP-51, MSP-50, MSP-142, MSP-40, MSP-152	819	5	8829	10.7802	0.0303798	0.00615117	0.368915
GOTERM_BP_FAT	GO:0030258~lipid modification	14	0.664452	0.000358523	UGT-16, UGT-11, UGT-30, UGT-2, UGT-13, UGT-54, UGT-36, UGT-25, UGT-47, UGT-4, UGT-8, F54C1.1, UGT-40, UGT-7	582	60	7838	3.14238	0.201065	0.0315592	0.531264
GOTERM_BP_3	GO:0044260~cellular macromolecule metabolic process	183	8.68533	0.000382606	R06B10.1, K06H7.8, CRN-6, C18H7.4, ZK666.8, F26A1.3, TAG-191, R10D12.10, ZK484.7, F01D4.3, C03C10.2, W09C3.1, C14A4.13, W06F12.3, C27D8.1, UBC-24, F54H5.2, T22C1.8, W03F8.2, F26E4.5, ZK596.2, W03A5.1, ZK809.1, C09B9.4, C07E3.4, ZC581.7, F42C5.5, F57B9.8, F55H12.5, NHR-25, OLD-1, C02B10.6, R13H9.6, R13H9.5, M7.7, ZC581.2, F20H11.4, F26A1.4, KIN-21, KIN-24, Y80D3A.8, F22B3.8, Y39B6A.30, C27D6.11, F…	591	1969	7908	1.24361	0.0957458	0.0329917	0.499847
PIR_SUPERFAMILY	PIRSF015994:Caenorhabditis elegans hypothetical protein F36D3.5	5	0.237304	0.000427564	F26D2.10, C18H2.5, T08G3.7, F36D3.5, F37A4.4	448	5	4541	10.1362	0.105614	0.0138554	0.557766
INTERPRO	IPR003582:Metridin-like ShK toxin	23	1.0916	0.00054195	F01D5.5, F49F1.5, Y39G8B.9, DOD-6, F01D5.1, C54D10.3, Y39G8B.7, F15A4.6, M04G7.1, T28H10.2, F48G7.5, PHAT-2, PHAT-3, M163.8, PHAT-4, E04D5.4, ZK673.1, F41G3.10, T20G5.8, PHAT-6, F41G3.21, C14C6.5, NAS-6	1253	113	13633	2.21457	0.312055	0.0112708	0.812621
GOTERM_CC_FAT	GO:0031143~pseudopodium	5	0.237304	0.000594138	MSP-56, MSP-31, MSP-57, MSP-45, MSP-33, MSP-59, MSP-53, MSP-19, MSP-36, MSP-55, MSP-38, MSP-81, MSP-113, MSP-49, F58A6.9, MSP-10, MSP-79, MSP-78, MSP-64, MSP-77, MSP-63, MSP-76, MSP-3, MSP-65, MSP-51, MSP-50, MSP-142, MSP-40, MSP-152	847	5	7912	9.3412	0.0677265	0.0231053	0.677848
GOTERM_BP_3	GO:0006629~lipid metabolic process	40	1.89843	0.00074449	Y46H3A.4, T09B9.3, F55C5.2, F54C8.1, C31H1.5, B0524.2, Y51A2B.4, ECH-9, UGT-25, UGT-47, FAT-5, UGT-40, F54C1.1, F25A2.1, F44B9.10, ACS-2, Y71F9B.9, FAT-1, W03D8.8, CYP-13A10, UGT-16, T28C6.5, M110.7, T19D7.7, STDH-2, UGT-11, PAF-1, UGT-30, UGT-2, UGT-13, UGT-54, UGT-36, HSD-2, ZK262.3, ZK1251.3, UGT-4, UGT-8, K11E4.1, ASM-2, UGT-7	591	309	7908	1.73213	0.177884	0.0477888	0.970497
SMART	SM00254:ShKT	23	1.0916	0.000896423	F01D5.5, F49F1.5, Y39G8B.9, DOD-6, F01D5.1, C54D10.3, Y39G8B.7, F15A4.6, M04G7.1, T28H10.2, F48G7.5, PHAT-2, PHAT-3, M163.8, PHAT-4, E04D5.4, ZK673.1, F41G3.10, T20G5.8, PHAT-6, F41G3.21, C14C6.5, NAS-6	532	113	5537	2.11842	0.10845	0.0126738	1.03611
COG_ONTOLOGY	General function prediction only / Signal transduction mechanisms / Transcription / DNA replication, recombination, and repair	4	0.189843	0.000979378	K09C6.8, K09C6.7, Y39G8B.5, C04G2.2	73	4	1118	15.3151	0.0203667	0.0102358	0.753729
INTERPRO	IPR018378:C-type lectin, conserved site	13	0.616991	0.00104716	CLEC-10, CLEC-17, CLEC-28, CLEC-4, CLEC-160, CLEC-35, CLEC-25, CLEC-41, CLEC-22, CLEC-31, CLEC-40, CLEC-33, CLEC-42	1253	48	13633	2.94674	0.514668	0.021038	1.5646
SP_PIR_KEYWORDS	Lectin	25	1.18652	0.00125492	CLEC-85, CLEC-28, CLEC-160, CLEC-86, CLEC-25, CLEC-22, CLEC-166, CLEC-165, CLEC-43, CLEC-42, CLEC-10, CLEC-117, CLEC-80, CLEC-139, CLEC-136, CLEC-137, CLEC-170, CLEC-4, CLEC-72, CLEC-35, CLEC-73, CLEC-31, CLEC-52, CLEC-33, CLEC-51	2048	120	19674	2.00134	0.204304	0.0321211	1.53762
PIR_SUPERFAMILY	PIRSF005678:glucuronosyltransferase	11	0.522069	0.00147253	UGT-21, UGT-32, UGT-11, UGT-2, UGT-13, UGT-63, UGT-25, UGT-47, UGT-16, UGT-19, UGT-8	448	35	4541	3.18565	0.319287	0.0418346	1.90888
GOTERM_MF_3	GO:0005102~receptor binding	15	0.711913	0.00175008	C49C8.5, DAF-7, INS-28, INS-19, INS-37, FLP-3, INS-26, INS-7, INS-33, LEV-8, ZC168.2, DAF-28, EGL-17, Y43C5A.2, INS-6	567	75	7243	2.55485	0.123107	0.0216572	1.82153
INTERPRO	IPR018244:Allergen V5/Tpx-1 related, conserved site	5	0.237304	0.00197443	D2062.1, C07A4.3, VAP-1, LON-1, SCL-3	1253	7	13633	7.77163	0.744288	0.0382137	2.93096
GOTERM_BP_5	GO:0030704~vitelline membrane formation	7	0.332226	0.00203453	Y57G11A.2, Y39F10C.1, Y54E2A.9, C08G5.3, T02H6.9, T02H6.7, R105.1	480	20	6749	4.92115	0.499649	0.0941857	2.73531
GOTERM_MF_4	GO:0016758~transferase activity, transferring hexosyl groups	30	1.42383	0.00205436	UGT-49, Y73B6A.3, Y5H2B.1, UGT-42, FUT-5, UGT-21, UGT-25, UGT-63, FUT-2, UGT-47, T27F6.1, T19H12.3, T28F3.9, K02E11.6, UGT-40, F54C1.1, K02E11.4, K02E11.3, UGT-16, UGT-19, UGT-32, UGT-11, UGT-30, UGT-2, UGT-13, UGT-54, UGT-36, UGT-4, UGT-8, UGT-7	527	194	6132	1.79933	0.167253	0.0300437	2.20763
INTERPRO	IPR004045:Glutathione S-transferase, N-terminal	13	0.616991	0.00220208	GST-41, GST-14, F56A4.3, GST-2, GST-25, GST-38, GST-24, GST-33, GST-8, GST-35, GST-6, W10C8.4, GST-12	1253	52	13633	2.72007	0.781531	0.0413729	3.26369
GOTERM_BP_2	GO:0044237~cellular metabolic process	238	11.2957	0.00221698	TAG-191, R10D12.10, ZK484.7, C31H1.5, C14A4.13, C27D8.1, F54H5.2, T22C1.8, HDL-1, W03A5.1, C09B9.4, C07E3.4, F57B9.8, F42C5.5, F55H12.5, OLD-1, M7.7, CYC-2.2, UGT-2, KIN-21, UGT-54, KIN-24, UGT-4, C27D6.11, F55D12.6, UGT-8, UGT-7, T19D12.5, B0207.7, C56C10.6, R09E10.9, C33H5.16, TTLL-15, K09F6.3, C46A5.1, T04F3.3, Y54F10BM.3, UGT-25, UGT-47, F21F3.2, Y69A2AR.19, B0207.1, UGT-40, F54C1.1, UGT-16, …	613	2709	8116	1.16319	0.19904	0.071311	2.43334
KEGG_PATHWAY	cel00280:Valine, leucine and isoleucine degradation	7	0.332226	0.00237946	ECH-9, ACDH-7, Y44A6D.5, ACDH-8, ECH-7, T02G5.4, F54C8.1	52	43	1534	4.80233	0.120713	0.0419749	2.3068
GOTERM_BP_4	GO:0030704~vitelline membrane formation	7	0.332226	0.00242409	Y57G11A.2, Y39F10C.1, Y54E2A.9, C08G5.3, T02H6.9, T02H6.7, R105.1	565	20	7683	4.75938	0.583621	0.135865	3.27969
PIR_SUPERFAMILY	PIRSF000925:tyrosine-protein phosphatase	6	0.284765	0.00252541	C17H12.3, T27A3.5, C33H5.16, C02B10.6, ZK484.7, F47B3.7	448	11	4541	5.52881	0.483131	0.0638659	3.25306
GOTERM_BP_FAT	GO:0030704~vitelline membrane formation	7	0.332226	0.00254815	Y57G11A.2, Y39F10C.1, Y54E2A.9, C08G5.3, T02H6.9, T02H6.7, R105.1	582	20	7838	4.71357	0.797533	0.18098	3.71918
INTERPRO	IPR003439:ABC transporter-like	13	0.616991	0.00308499	PGP-13, PGP-14, PMP-1, PGP-12, PGP-3, WHT-4, PGP-7, WHT-5, WHT-3, ABT-5, WHT-6, PGP-8, CFT-1	1253	54	13633	2.61933	0.881392	0.0559913	4.54409
GOTERM_CC_FAT	GO:0016021~integral to membrane	734	34.8363	0.00330003	Y37H2A.14, C06G4.4, T24C4.4, F56A11.6, Y105C5B.17, SRH-70, F58F12.2, F32B4.2, GTL-2, COL-97, C31H1.2, T05E12.3, COL-95, TSP-5, DPF-2, TSP-4, E04F6.4, ABT-5, UGT-63, T22C1.9, C38D9.5, ABT-1, T19A6.4, TSP-3, CDH-10, C45B2.2, C09B9.7, W01D2.3, C09B9.2, T19D7.7, C45B2.1, M03E7.3, COL-85, F56D6.14, Y69A2AR.23, COL-88, UGT-54, MEC-4, F56D6.13, F56D6.12, COL-81, F49D11.3, Y73F8A.35, F08A8.8, DAF-9, T22F…	847	6596	7912	1.03949	0.322975	0.0929083	3.71226
INTERPRO	IPR008271:Serine/threonine protein kinase, active site	33	1.56621	0.00344536	K06H7.8, T19D12.5, F26A1.3, ZK666.8, C25H3.1, Y47G6A.13, C08F8.6, D2045.5, C03C10.2, T15B12.2, W06F12.3, F41G3.5, C55C3.8, C04G2.2, W02B12.12, F21F3.2, ZK596.2, ZK354.6, C39H7.1, GSKA-3, W01B6.2, Y39G8B.5, R13H9.5, ZC581.2, C50F4.10, F26A1.4, Y38H8A.4, ZK507.3, Y38H8A.3, K11C4.1, F32B6.10, Y106G6E.1, C27D6.11	1253	212	13633	1.69363	0.907579	0.0607453	5.06215
PIR_SUPERFAMILY	PIRSF016383:uncharacterized conserved protein	4	0.189843	0.00351396	W03D8.9, K06A5.2, Y69E1A.1, W03D8.10	448	4	4541	10.1362	0.600986	0.0801305	4.4996
INTERPRO	IPR003235:Nematode insulin-related peptide, beta type	8	0.379687	0.00355888	INS-7, INS-33, DAF-28, INS-19, INS-37, INS-28, INS-6, INS-26	1253	23	13633	3.78445	0.914565	0.0611289	5.22478
PIR_SUPERFAMILY	PIRSF000564:kinase-related transforming protein	10	0.474608	0.00358438	K06H7.8, F33D11.7, C50F4.10, Y38H8A.4, ZK666.8, B0218.5, ZK596.2, K08H2.5, F21F3.2, R13H9.5	448	33	4541	3.07156	0.608278	0.0751284	4.58783
GOTERM_BP_FAT	GO:0030198~extracellular matrix organization	7	0.332226	0.00431915	Y57G11A.2, Y39F10C.1, Y54E2A.9, C08G5.3, T02H6.9, T02H6.7, R105.1	582	22	7838	4.28507	0.933439	0.259975	6.22762
GOTERM_MF_2	GO:0008316~structural constituent of vitelline membrane	7	0.332226	0.00437904	Y57G11A.2, Y39F10C.1, Y54E2A.9, C08G5.3, T02H6.9, T02H6.7, R105.1	734	20	8884	4.23624	0.164675	0.0253774	3.95827
GOTERM_BP_3	GO:0030198~extracellular matrix organization	7	0.332226	0.00446088	Y57G11A.2, Y39F10C.1, Y54E2A.9, C08G5.3, T02H6.9, T02H6.7, R105.1	591	22	7908	4.2575	0.691439	0.209561	5.6863
INTERPRO	IPR001357:BRCT	9	0.427148	0.00461456	F26D2.10, C18H2.5, T08G3.7, F36D3.5, C01G10.1, F56H1.3, F37A4.4, C18H2.1, F40E12.2	1253	30	13633	3.26409	0.958886	0.0766855	6.72491
GOTERM_CC_FAT	GO:0031224~intrinsic to membrane	734	34.8363	0.00473165	Y37H2A.14, C06G4.4, T24C4.4, F56A11.6, Y105C5B.17, SRH-70, F58F12.2, F32B4.2, GTL-2, COL-97, C31H1.2, T05E12.3, COL-95, TSP-5, DPF-2, TSP-4, E04F6.4, ABT-5, UGT-63, T22C1.9, C38D9.5, ABT-1, T19A6.4, TSP-3, CDH-10, C45B2.2, C09B9.7, W01D2.3, C09B9.2, T19D7.7, C45B2.1, M03E7.3, COL-85, F56D6.14, Y69A2AR.23, COL-88, UGT-54, MEC-4, F56D6.13, F56D6.12, COL-81, F49D11.3, Y73F8A.35, F08A8.8, DAF-9, T22F…	847	6608	7912	1.0376	0.428596	0.105895	5.28325
GOTERM_MF_3	GO:0005529~sugar binding	17	0.806834	0.00536082	CLEC-10, CLEC-117, CLEC-80, CLEC-139, CLEC-136, CLEC-137, CLEC-85, CLEC-170, CLEC-160, CLEC-72, CLEC-73, CLEC-86, CLEC-166, CLEC-52, CLEC-51, CLEC-165, CLEC-43	567	102	7243	2.12904	0.331784	0.0559649	5.48517
INTERPRO	IPR003366:CUB-like region	12	0.56953	0.00575095	DCT-17, F35E12.10, DOD-17, F55G11.4, K10D11.3, F54B11.11, F10A3.4, DCT-19, DOD-21, K10D11.6, K10D11.5, K08D8.3	1253	51	13633	2.56007	0.981307	0.0925017	8.31493
GOTERM_MF_3	GO:0016757~transferase activity, transferring glycosyl groups	30	1.42383	0.00590657	UGT-49, Y73B6A.3, Y5H2B.1, UGT-42, FUT-5, UGT-21, UGT-25, UGT-63, FUT-2, UGT-47, T27F6.1, T19H12.3, T28F3.9, K02E11.6, UGT-40, F54C1.1, K02E11.4, K02E11.3, UGT-16, UGT-19, UGT-32, UGT-11, UGT-30, UGT-2, UGT-13, UGT-54, UGT-36, UGT-4, UGT-8, UGT-7	567	228	7243	1.68082	0.358731	0.0540242	6.02802
SMART	SM00292:BRCT	9	0.427148	0.00591847	F26D2.10, C18H2.5, T08G3.7, F36D3.5, C01G10.1, F56H1.3, F37A4.4, C18H2.1, F40E12.2	532	30	5537	3.12237	0.532247	0.0731667	6.66149
GOTERM_BP_4	GO:0044255~cellular lipid metabolic process	25	1.18652	0.00606374	F54C8.1, C31H1.5, ECH-9, UGT-25, UGT-47, FAT-5, F44B9.10, F54C1.1, UGT-40, ACS-2, Y71F9B.9, FAT-1, CYP-13A10, UGT-16, M110.7, UGT-11, UGT-30, UGT-2, UGT-13, UGT-36, UGT-54, UGT-4, ASM-2, UGT-8, UGT-7	565	190	7683	1.78924	0.888717	0.269238	8.01711
PIR_SUPERFAMILY	PIRSF000503:glutathione transferase	8	0.379687	0.00668928	GST-41, GST-2, GST-25, GST-38, GST-8, GST-35, GST-6, W10C8.4	448	24	4541	3.37872	0.826533	0.126067	8.404
INTERPRO	IPR017933:Glutathione S-transferase/chloride channel, C-terminal	12	0.56953	0.00670308	GST-41, GST-14, GST-2, GST-25, GST-38, GST-24, GST-33, GST-8, GST-35, GST-6, W10C8.4, GST-12	1253	52	13633	2.51084	0.990349	0.104607	9.62763
GOTERM_BP_3	GO:0044255~cellular lipid metabolic process	25	1.18652	0.00740017	F54C8.1, C31H1.5, ECH-9, UGT-25, UGT-47, FAT-5, F44B9.10, F54C1.1, UGT-40, ACS-2, Y71F9B.9, FAT-1, CYP-13A10, UGT-16, M110.7, UGT-11, UGT-30, UGT-2, UGT-13, UGT-36, UGT-54, UGT-4, ASM-2, UGT-8, UGT-7	591	190	7908	1.76062	0.85822	0.277892	9.26817
INTERPRO	IPR005515:Vitelline membrane outer layer protein I (VOMI)	7	0.332226	0.00744087	Y57G11A.2, Y39F10C.1, Y54E2A.9, C08G5.3, T02H6.9, T02H6.7, R105.1	1253	20	13633	3.8081	0.99422	0.112943	10.6327
GOTERM_MF_FAT	GO:0005506~iron ion binding	38	1.80351	0.00779713	C27B7.6, DAF-9, Y71G12B.30, T16G12.7, CYP-13A7, LET-268, GSP-3, GSP-4, C06A1.3, R08A2.2, Y69E1A.4, F49E11.7, CYP-33E2, CYP-14A2, F23B12.1, FAT-5, F52H3.6, CYP-33C8, PXN-1, CYP-14A3, C23G10.1, F58G1.3, Y54G2A.24, CYP-34A4, CYP-34A10, CYP-13A10, CYP-25A1, F42G8.8, GCY-34, ZK938.1, GLB-27, GLB-28, C47A4.3, CYC-2.2, C34D4.2, T25B9.2, CYP-29A4, R13A5.11	632	262	6686	1.53438	0.922061	0.139385	10.0509
PIR_SUPERFAMILY	PIRSF010371:venom allergen antigen 5	5	0.237304	0.00780492	SCL-5, SCL-6, SCL-7, SCL-8, SCL-3	448	9	4541	5.6312	0.870629	0.135909	9.74042
SP_PIR_KEYWORDS	cuticle	10	0.474608	0.00808851	COL-145, COL-10, COL-13, COL-12, SQT-3, COL-79, COL-14, BLI-1, COL-7, DPY-7	2048	35	19674	2.7447	0.771928	0.168698	9.53614
PIR_SUPERFAMILY	PIRSF017573:PIRSF017573	4	0.189843	0.00814355	C14A6.6, C14A6.13, W04E12.5, W04E12.4	448	5	4541	8.10893	0.881657	0.13262	10.1425
GOTERM_CC_2	GO:0042995~cell projection	9	0.427148	0.00821054	MSP-56, MSP-57, MSP-31, MSP-33, MSP-59, MSP-53, MSP-36, MSP-19, MSP-55, MSP-38, MSP-113, F58A6.9, MSP-10, MSP-64, MSP-63, MSP-3, MSP-65, CHE-3, MSP-40, MSP-152, MSP-45, TNC-2, MSP-81, H06I04.5, MSP-49, MSP-79, MSP-78, MSP-77, MSP-76, MSP-51, MSP-50, MSP-142, IFT-81	837	34	9458	2.99114	0.225531	0.0816645	6.83767
GOTERM_CC_3	GO:0042995~cell projection	9	0.427148	0.00821054	MSP-56, MSP-57, MSP-31, MSP-33, MSP-59, MSP-53, MSP-36, MSP-19, MSP-55, MSP-38, MSP-113, F58A6.9, MSP-10, MSP-64, MSP-63, MSP-3, MSP-65, CHE-3, MSP-40, MSP-152, MSP-45, TNC-2, MSP-81, H06I04.5, MSP-49, MSP-79, MSP-78, MSP-77, MSP-76, MSP-51, MSP-50, MSP-142, IFT-81	837	34	9458	2.99114	0.443092	0.110478	8.20115
GOTERM_MF_FAT	GO:0008316~structural constituent of vitelline membrane	7	0.332226	0.00843631	Y57G11A.2, Y39F10C.1, Y54E2A.9, C08G5.3, T02H6.9, T02H6.7, R105.1	632	20	6686	3.70269	0.936829	0.142247	10.8319
GOTERM_MF_3	GO:0030414~peptidase inhibitor activity	15	0.711913	0.00867832	Y57G11C.5, ZK287.4, C54D10.10, Y73F8A.20, R01H2.4, T01D3.3, SRP-1, C02F12.5, MLT-11, C31H1.2, CPI-1, F44G3.7, SPON-1, F29G6.1, TAG-290	567	89	7243	2.15296	0.47989	0.0700598	8.74176
SP_PIR_KEYWORDS	acetylation	10	0.474608	0.00981072	MSP-56, MSP-31, MSP-57, MSP-33, MSP-59, MSP-53, MSP-36, MSP-19, MSP-55, MSP-38, HIS-6, MSP-113, F58A6.9, HIS-59, MSP-10, HIS-32, MSP-64, MSP-63, MSP-3, MSP-65, HIS-70, MSP-40, MSP-152, MSP-45, HIS-61, F37C4.5, HIS-64, MSP-81, MSP-49, MSP-79, MSP-78, MSP-77, MSP-76, HIS-38, MSP-51, MSP-50, MSP-142	2048	36	19674	2.66846	0.833767	0.180757	11.4554
GOTERM_MF_3	GO:0022804~active transmembrane transporter activity	25	1.18652	0.0118794	SULP-7, PGP-13, PGP-14, PGP-12, SNF-10, GLT-5, GLT-6, PBO-4, AAT-7, C49A9.3, AAT-2, ABTS-2, PGP-7, NHX-9, PGP-4, F41E7.1, PGP-8, CFT-1, NHX-1, SULP-4, PGP-3, SNF-8, SNF-5, SNF-2, F56F4.3	567	189	7243	1.68972	0.591919	0.0857296	11.7875
PIR_SUPERFAMILY	PIRSF019658:Caenorhabditis elegans hypothetical protein F32B6.7	5	0.237304	0.0120098	SSP-19, C34D4.3, SSP-16, SSP-31, SSP-11	448	10	4541	5.06808	0.957299	0.178888	14.6172
INTERPRO	IPR001534:Transthyretin-like	13	0.616991	0.012628	F26G1.11, TTR-11, TTR-23, TTR-9, TTR-20, TTR-14, NLP-4, TTR-12, TTR-56, TTR-21, TTR-29, TTR-27, TTR-28	1253	64	13633	2.21006	0.999844	0.180689	17.41
GOTERM_MF_4	GO:0005179~hormone activity	10	0.474608	0.012688	INS-7, INS-33, ZC168.2, DAF-28, INS-19, INS-37, INS-28, FLP-3, INS-6, INS-26	527	45	6132	2.58571	0.679047	0.149858	12.9436
GOTERM_MF_FAT	GO:0000166~nucleotide binding	152	7.21405	0.0148429	K06H7.8, C18H7.4, ZK666.8, C44C10.4, F26A1.3, TAG-191, R10D12.10, CPB-2, F01D4.3, W09C3.1, C03C10.2, C14A4.13, W06F12.3, C27D8.1, ABT-5, F54H5.2, W03F8.2, ABT-1, F26E4.5, ZK596.2, W03A5.1, C09B9.4, ZC581.7, F57B9.8, OLD-1, R13H9.6, R13H9.5, M7.7, ZC581.2, F26A1.4, KIN-21, KIN-24, F22B3.8, C27D6.11, MEC-7, T19D12.5, B0207.7, C56C10.6, GCY-22, Y47G6A.13, ACDH-5, Y69E1A.3, H05L14.1, ACDH-7, ACDH-8, …	632	1369	6686	1.1746	0.992365	0.226308	18.3202
SP_PIR_KEYWORDS	atp-binding	86	4.08163	0.0151381	K06H7.8, PMP-1, C35E7.10, Y69F12A.1, C05C12.1, C18H7.4, ZK666.8, C25H3.1, F01D4.3, C25A8.5, C03C10.2, W09C3.1, C14A4.13, W06F12.3, ABT-5, C27D8.1, W02B12.12, W03F8.2, B0218.5, F26E4.5, ZK596.2, W03A5.1, Y116A8C.38, FRK-1, F38E1.3, K09B11.5, GLN-2, W01B6.5, ZC581.7, F57B9.8, OLD-1, R13H9.6, ZC581.2, C34F11.5, KIN-21, F59A3.8, Y38H8A.4, KIN-24, F53C3.1, ZK507.3, Y38H8A.3, F22B3.8, Y116A8C.24, C27D6…	2048	649	19674	1.27297	0.937725	0.242415	17.1581
SP_PIR_KEYWORDS	metalloprotein	18	0.854295	0.0180406	F58G1.3, SOD-3, CYP-34A4, T16G12.7, CYP-34A10, F42G8.8, CYP-13A7, ZK938.1, GSP-4, Y69E1A.4, F49E11.7, CYC-2.2, C34D4.2, CYP-14A2, Y105C5B.3, F52H3.6, CYP-14A3, Y40H4A.2	2048	95	19674	1.82017	0.963607	0.260082	20.1211
INTERPRO	IPR009564:Protein of unknown function DUF1179	4	0.189843	0.0203898	H38K22.6, H38K22.7, C06C6.8, Y57G7A.3	1253	7	13633	6.21731	0.999999	0.27085	26.6605
UP_SEQ_FEATURE	repeat:Kelch 2	3	0.142383	0.021435	F47D12.7, SPE-26, KEL-10	204	4	3249	11.9449	0.999873	0.893822	26.1947
UP_SEQ_FEATURE	repeat:Kelch 6	3	0.142383	0.021435	F47D12.7, SPE-26, KEL-10	204	4	3249	11.9449	0.999873	0.893822	26.1947
UP_SEQ_FEATURE	repeat:Kelch 5	3	0.142383	0.021435	F47D12.7, SPE-26, KEL-10	204	4	3249	11.9449	0.999873	0.893822	26.1947
UP_SEQ_FEATURE	repeat:Kelch 4	3	0.142383	0.021435	F47D12.7, SPE-26, KEL-10	204	4	3249	11.9449	0.999873	0.893822	26.1947
UP_SEQ_FEATURE	repeat:Kelch 3	3	0.142383	0.021435	F47D12.7, SPE-26, KEL-10	204	4	3249	11.9449	0.999873	0.893822	26.1947
UP_SEQ_FEATURE	repeat:Kelch 1	3	0.142383	0.021435	F47D12.7, SPE-26, KEL-10	204	4	3249	11.9449	0.999873	0.893822	26.1947
KEGG_PATHWAY	cel00650:Butanoate metabolism	5	0.237304	0.0217532	STDH-2, ECH-9, ECH-7, T02G5.4, F54C8.1	52	33	1534	4.4697	0.695058	0.256888	19.3828
GOTERM_MF_FAT	GO:0005179~hormone activity	10	0.474608	0.0225775	INS-7, INS-33, ZC168.2, DAF-28, INS-19, INS-37, INS-28, FLP-3, INS-6, INS-26	632	45	6686	2.35091	0.999415	0.310805	26.5839
KEGG_PATHWAY	cel04142:Lysosome	7	0.332226	0.0225944	HEX-1, CPZ-1, APT-9, CRN-6, Y53G8AR.7, Y105E8B.9, ASM-2	52	68	1534	3.03676	0.708901	0.218717	20.0594
INTERPRO	IPR004825:Insulin/IGF/relaxin	7	0.332226	0.0229056	INS-7, INS-22, DAF-28, INS-19, INS-37, INS-23, INS-6	1253	25	13633	3.04648	1	0.293605	29.4448
GOTERM_MF_2	GO:0004857~enzyme inhibitor activity	15	0.711913	0.0233084	Y57G11C.5, ZK287.4, C54D10.10, Y73F8A.20, R01H2.4, T01D3.3, SRP-1, C02F12.5, MLT-11, C31H1.2, CPI-1, F44G3.7, SPON-1, F29G6.1, TAG-290	734	95	8884	1.91109	0.619763	0.113851	19.5102
GOTERM_CC_FAT	GO:0042995~cell projection	9	0.427148	0.0240674	MSP-56, MSP-57, MSP-31, MSP-33, MSP-59, MSP-53, MSP-36, MSP-19, MSP-55, MSP-38, MSP-113, F58A6.9, MSP-10, MSP-64, MSP-63, MSP-3, MSP-65, CHE-3, MSP-40, MSP-152, MSP-45, TNC-2, MSP-81, H06I04.5, MSP-49, MSP-79, MSP-78, MSP-77, MSP-76, MSP-51, MSP-50, MSP-142, IFT-81	847	34	7912	2.47267	0.943566	0.380668	24.3313
UP_SEQ_FEATURE	disulfide bond	22	1.04414	0.0246843	C27B7.7, DAF-7, NAS-25, INS-23, F26C11.1, NAS-38, INS-7, ACR-7, INS-22, DPF-2, ZC168.2, CLEC-160, DOP-3, ZK262.3, GAR-1, ZK673.1, F32A5.4, PXN-1, ASM-2, INS-6, C27A7.1, NAS-6	204	215	3249	1.62969	0.999968	0.873752	29.5568
GOTERM_MF_4	GO:0004866~endopeptidase inhibitor activity	14	0.664452	0.0256795	Y57G11C.5, ZK287.4, C54D10.10, Y73F8A.20, R01H2.4, SRP-1, C02F12.5, MLT-11, C31H1.2, CPI-1, F44G3.7, SPON-1, F29G6.1, TAG-290	527	84	6132	1.93928	0.901266	0.251299	24.6028
INTERPRO	IPR007026:Domian of unknown function, DUF-CC	5	0.237304	0.0257786	Y110A2AL.3, F15A4.6, Y110A2AL.9, T19H12.6, C14C6.5	1253	13	13633	4.18473	1	0.31847	32.5037
PIR_SUPERFAMILY	PIRSF015812:Caenorhabditis elegans hypothetical protein F57E7.1	3	0.142383	0.0271145	C33G8.4, F20A1.1, F20A1.10	448	3	4541	10.1362	0.999234	0.344289	30.1992
PIR_SUPERFAMILY	PIRSF019680:PIRSF019680	3	0.142383	0.0271145	C06C6.7, C06C6.6, F36G9.13	448	3	4541	10.1362	0.999234	0.344289	30.1992
PIR_SUPERFAMILY	PIRSF016405:Caenorhabditis elegans hypothetical protein F36D3.4	3	0.142383	0.0271145	F36D3.4, F53B6.4, F21H7.5	448	3	4541	10.1362	0.999234	0.344289	30.1992
PIR_SUPERFAMILY	PIRSF028860:Caenorhabditis elegans hypothetical protein C24D10.1	3	0.142383	0.0271145	Y57G11C.6, C17H12.5, C24D10.1	448	3	4541	10.1362	0.999234	0.344289	30.1992
PIR_SUPERFAMILY	PIRSF016363:hypothetical protein, Caenorhabditis elegans C24D10.2 type	3	0.142383	0.0271145	F11G11.4, C24D10.2, C27D6.3	448	3	4541	10.1362	0.999234	0.344289	30.1992
PIR_SUPERFAMILY	PIRSF015801:Caenorhabditis elegans hypothetical protein K08D10.7	3	0.142383	0.0271145	SCRM-8, SCRM-6, SCRM-5	448	3	4541	10.1362	0.999234	0.344289	30.1992
SP_PIR_KEYWORDS	Secreted	27	1.28144	0.027279	C27B7.7, DAF-7, NAS-25, INS-23, FLP-3, INS-7, FLP-1, CLEC-160, F37H8.5, PXN-1, C03G6.5, INS-6, NAS-6, Y73F4A.2, Y45F10C.4, C08F11.12, FLP-13, Y45F10C.2, NAS-38, INS-22, VIT-1, VIT-3, ZK262.3, NLP-28, FAR-1, F32A5.4, ASM-2	2048	169	19674	1.53476	0.993486	0.342611	28.9158
GOTERM_BP_5	GO:0007286~spermatid development	3	0.142383	0.0273966	SPE-8, SPE-10, SPE-4	480	4	6749	10.5453	0.999921	0.692906	31.4967
GOTERM_BP_5	GO:0048515~spermatid differentiation	3	0.142383	0.0273966	SPE-8, SPE-10, SPE-4	480	4	6749	10.5453	0.999921	0.692906	31.4967
SMART	SM00078:IlGF	7	0.332226	0.0275489	INS-7, INS-22, DAF-28, INS-19, INS-37, INS-23, INS-6	532	25	5537	2.91421	0.972006	0.277522	27.7057
GOTERM_BP_FAT	GO:0043062~extracellular structure organization	7	0.332226	0.0279498	Y57G11A.2, Y39F10C.1, Y54E2A.9, C08G5.3, T02H6.9, T02H6.7, R105.1	582	32	7838	2.94598	1	0.830444	34.3679
GOTERM_MF_FAT	GO:0005529~sugar binding	17	0.806834	0.0286475	CLEC-10, CLEC-117, CLEC-80, CLEC-139, CLEC-136, CLEC-137, CLEC-85, CLEC-170, CLEC-160, CLEC-72, CLEC-73, CLEC-86, CLEC-166, CLEC-52, CLEC-51, CLEC-165, CLEC-43	632	102	6686	1.76319	0.999923	0.363145	32.5192
GOTERM_BP_4	GO:0048515~spermatid differentiation	3	0.142383	0.0292171	SPE-8, SPE-10, SPE-4	565	4	7683	10.1987	0.999978	0.737648	33.4632
GOTERM_BP_4	GO:0007286~spermatid development	3	0.142383	0.0292171	SPE-8, SPE-10, SPE-4	565	4	7683	10.1987	0.999978	0.737648	33.4632
COG_ONTOLOGY	Secondary metabolites biosynthesis, transport, and catabolism	11	0.522069	0.0296115	CYP-33E2, DAF-9, CYP-14A2, CYP-34A4, CYP-13A10, CYP-34A10, CYP-25A1, CYP-13A7, CYP-29A4, CYP-33C8, CYP-14A3	73	81	1118	2.07982	0.468065	0.189749	20.7129
GOTERM_BP_FAT	GO:0048515~spermatid differentiation	3	0.142383	0.0297624	SPE-8, SPE-10, SPE-4	582	4	7838	10.1005	1	0.820838	36.1627
GOTERM_BP_FAT	GO:0007286~spermatid development	3	0.142383	0.0297624	SPE-8, SPE-10, SPE-4	582	4	7838	10.1005	1	0.820838	36.1627
GOTERM_BP_2	GO:0043062~extracellular structure organization	7	0.332226	0.0301068	Y57G11A.2, Y39F10C.1, Y54E2A.9, C08G5.3, T02H6.9, T02H6.7, R105.1	613	32	8116	2.89621	0.952968	0.534308	28.773
INTERPRO	IPR013525:ABC-2 type transporter	4	0.189843	0.0304263	WHT-4, WHT-5, WHT-3, WHT-6	1253	8	13633	5.44014	1	0.358643	37.1912
INTERPRO	IPR005552:Scramblase	4	0.189843	0.0304263	SCRM-8, SCRM-6, SCRM-7, SCRM-5	1253	8	13633	5.44014	1	0.358643	37.1912
GOTERM_MF_3	GO:0005328~neurotransmitter:sodium symporter activity	5	0.237304	0.0315151	SNF-10, SNF-8, SNF-5, SNF-2, F56F4.3	567	16	7243	3.99195	0.909434	0.196143	28.5431
UP_SEQ_FEATURE	glycosylation site:N-linked (GlcNAc...)	37	1.75605	0.03174	C27B7.7, CRN-6, DAF-7, C36C5.12, TTYH-1, GLT-6, NAS-25, LET-268, ACN-1, PAT-2, GLR-2, DPF-2, NHX-9, GAR-1, F37H8.5, PXN-1, C03G6.5, Y73F4A.2, AC3.5, Y45F10C.4, LON-1, NAS-38, PGP-3, K07C11.7, ACR-7, C44B7.11, VIT-1, VIT-3, ZK512.1, HEX-1, ZK262.3, MEC-4, HST-2, F32A5.4, ASM-2, NCR-2, C27A7.1	204	426	3249	1.38329	0.999998	0.891994	36.3736
SP_PIR_KEYWORDS	cell projection	6	0.284765	0.0327619	MSP-56, MSP-31, MSP-57, MSP-45, MSP-33, MSP-59, MSP-53, MSP-19, MSP-36, MSP-55, MSP-38, MSP-81, MSP-113, MSP-49, F58A6.9, MSP-10, MSP-79, MSP-78, MSP-64, MSP-77, MSP-63, MSP-76, MSP-3, MSP-65, MSP-51, MSP-50, MSP-142, CHE-3, MSP-40, MSP-152	2048	18	19674	3.20215	0.997671	0.372711	33.7053
SP_PIR_KEYWORDS	transferase	71	3.36972	0.0333463	K06H7.8, C35E7.10, GST-25, C18H7.4, F01D4.3, C25A8.5, FUT-5, C03C10.2, F41E7.6, Y44A6D.5, UGT-63, FUT-2, W03F8.2, F26E4.5, Y116A8C.38, FRK-1, K09B11.5, W01B6.5, ZC581.7, GST-33, GST-8, F57B9.8, GST-35, OLD-1, GST-6, D1044.1, C34F11.5, KIN-21, F59A3.8, GST-2, KIN-24, ZK507.3, F22B3.8, UGT-4, Y116A8C.24, HST-2, Y43C5B.2, UGT-8, B0395.3, UGT-7, GST-41, R11E3.1, KIN-26, UGT-49, Y4C6A.1, Y69E1A.3, UGT…	2048	542	19674	1.25841	0.997914	0.35654	34.1979
GOTERM_BP_5	GO:0007283~spermatogenesis	6	0.284765	0.0334883	SPE-8, SPE-27, SPE-17, SPE-11, SPE-10, SPE-4	480	26	6749	3.24471	0.999991	0.723842	37.1141
KEGG_PATHWAY	cel00310:Lysine degradation	5	0.237304	0.0347359	ECH-9, ECH-7, T02G5.4, LET-268, F54C8.1	52	38	1534	3.88158	0.851785	0.272529	29.273
COG_ONTOLOGY	Inorganic ion transport and metabolism	5	0.237304	0.0348853	H25K10.1, SOD-3, B0285.6, SUL-3, ABT-1	73	20	1118	3.82877	0.525586	0.170074	23.9799
GOTERM_MF_4	GO:0015291~secondary active transmembrane transporter activity	14	0.664452	0.0360689	SULP-7, NHX-9, F41E7.1, SNF-10, GLT-5, PBO-4, GLT-6, SNF-8, NHX-1, SULP-4, SNF-5, SNF-2, ABTS-2, F56F4.3	527	88	6132	1.85113	0.961973	0.304604	32.8858
PIR_SUPERFAMILY	PIRSF015803:Caenorhabditis elegans hypothetical protein F48G7.8	4	0.189843	0.0364182	F48G7.5, C54D10.3, PHAT-2, C14C6.5	448	8	4541	5.06808	0.999938	0.416038	38.4426
INTERPRO	IPR004046:Glutathione S-transferase, C-terminal	10	0.474608	0.0364313	GST-41, GST-14, GST-2, GST-25, GST-24, GST-33, GST-8, GST-6, W10C8.4, GST-12	1253	50	13633	2.17606	1	0.407017	42.7982
GOTERM_BP_4	GO:0007283~spermatogenesis	6	0.284765	0.0380206	SPE-8, SPE-27, SPE-17, SPE-11, SPE-10, SPE-4	565	26	7683	3.13805	0.999999	0.788768	41.2912
GOTERM_BP_4	GO:0048232~male gamete generation	6	0.284765	0.0380206	SPE-8, SPE-27, SPE-17, SPE-11, SPE-10, SPE-4	565	26	7683	3.13805	0.999999	0.788768	41.2912
GOTERM_MF_FAT	GO:0030414~peptidase inhibitor activity	15	0.711913	0.0382208	Y57G11C.5, ZK287.4, C54D10.10, Y73F8A.20, R01H2.4, T01D3.3, SRP-1, C02F12.5, MLT-11, C31H1.2, CPI-1, F44G3.7, SPON-1, F29G6.1, TAG-290	632	89	6686	1.783	0.999997	0.438684	40.9838
GOTERM_MF_5	GO:0004867~serine-type endopeptidase inhibitor activity	13	0.616991	0.0387622	C31H1.2, Y57G11C.5, ZK287.4, C54D10.10, F44G3.7, Y73F8A.20, SPON-1, R01H2.4, F29G6.1, SRP-1, TAG-290, C02F12.5, MLT-11	449	76	4951	1.88615	0.972609	0.593181	35.0135
GOTERM_BP_FAT	GO:0048232~male gamete generation	6	0.284765	0.0394195	SPE-8, SPE-27, SPE-17, SPE-11, SPE-10, SPE-4	582	26	7838	3.10785	1	0.8773	44.9776
GOTERM_BP_FAT	GO:0007283~spermatogenesis	6	0.284765	0.0394195	SPE-8, SPE-27, SPE-17, SPE-11, SPE-10, SPE-4	582	26	7838	3.10785	1	0.8773	44.9776
INTERPRO	IPR000884:Thrombospondin, type 1 repeat	9	0.427148	0.0396476	F23H12.5, F14H12.3, C27A7.8, SPON-1, T19D2.1, Y73E7A.8, F11C7.2, F11C7.7, NAS-38	1253	43	13633	2.27727	1	0.427807	45.6057
GOTERM_BP_3	GO:0048232~male gamete generation	6	0.284765	0.0403761	SPE-8, SPE-27, SPE-17, SPE-11, SPE-10, SPE-4	591	26	7908	3.08786	0.99998	0.787425	41.7062
GOTERM_MF_FAT	GO:0015370~solute:sodium symporter activity	7	0.332226	0.0430276	SNF-10, GLT-5, GLT-6, SNF-8, SNF-5, SNF-2, F56F4.3	632	28	6686	2.64478	0.999999	0.46387	44.8526
UP_SEQ_FEATURE	metal ion-binding site:Manganese	4	0.189843	0.0431528	C27B7.6, C23G10.1, SOD-3, C06A1.3	204	13	3249	4.90045	1	0.926383	46.1167
GOTERM_BP_5	GO:0001539~ciliary or flagellar motility	3	0.142383	0.0435351	TNC-2, CHE-3, H06I04.5	480	5	6749	8.43625	1	0.779836	45.4551
SP_PIR_KEYWORDS	kinase	38	1.80351	0.0454136	R11E3.1, K06H7.8, C35E7.10, KIN-26, C18H7.4, Y4C6A.1, F01D4.3, Y69E1A.3, C25A8.5, Y52D5A.2, C03C10.2, C55C3.4, W03F8.2, F26E4.5, Y116A8C.38, KIN-5, FRK-1, K09B11.5, F09A5.2, T06C10.3, W01B6.5, ZC581.7, F57B9.8, OLD-1, D1044.1, T25B9.4, T25B9.5, ZK622.1, C34F11.5, SPE-8, KIN-21, KIN-24, F59A3.8, ZK507.3, F22B3.8, Y116A8C.24, T21G5.1, Y43C5B.2	2048	268	19674	1.36211	0.999788	0.431027	43.6472
GOTERM_BP_4	GO:0001539~ciliary or flagellar motility	3	0.142383	0.0463501	TNC-2, CHE-3, H06I04.5	565	5	7683	8.15894	1	0.819722	47.9032
GOTERM_MF_4	GO:0016298~lipase activity	10	0.474608	0.0470904	Y46H3A.4, Y51A2B.4, ZK262.3, T28C6.5, M110.7, F25A2.1, F44B9.10, K11E4.1, ASM-2, C31H1.5	527	56	6132	2.0778	0.986335	0.349031	40.7621
GOTERM_BP_FAT	GO:0001539~ciliary or flagellar motility	3	0.142383	0.0471918	TNC-2, CHE-3, H06I04.5	582	5	7838	8.08041	1	0.902494	51.2329
GOTERM_BP_3	GO:0001539~ciliary or flagellar motility	3	0.142383	0.0477607	TNC-2, CHE-3, H06I04.5	591	5	7908	8.02843	0.999997	0.799886	47.3146
INTERPRO	IPR017940:ABC transporter integral membrane type 1	8	0.379687	0.0485891	PGP-13, PGP-7, PMP-1, PGP-14, PGP-12, PGP-8, CFT-1, PGP-3	1253	37	13633	2.35249	1	0.490278	52.7495
SMART	SM00209:TSP1	9	0.427148	0.0488323	F23H12.5, F14H12.3, C27A7.8, SPON-1, T19D2.1, Y73E7A.8, F11C7.2, F11C7.7, NAS-38	532	43	5537	2.1784	0.998352	0.413759	44.0896
SP_PIR_KEYWORDS	signal	56	2.65781	0.049923	CRN-6, HIM-4, LET-268, ACN-1, B0228.1, INS-23, DPY-7, INS-7, F02A9.1, CLEC-160, PXN-1, COL-7, C03G6.5, INS-6, COL-10, COL-13, COL-12, ABF-2, C08F11.12, FLP-13, LON-1, BLI-1, NAS-38, INS-22, COL-145, K07C11.7, SPE-27, SQT-3, TAG-209, ZK262.3, FAR-1, ASM-2, C27B7.7, DAF-7, T09B9.3, NAS-25, GLR-2, PAT-2, FLP-3, FLP-1, B0416.2, F37H8.5, NAS-6, Y73F4A.2, Y45F10C.4, Y45F10C.2, ZK1290.11, VIT-1, ACR-7, …	2048	424	19674	1.26878	0.99991	0.441522	46.8456
GOTERM_MF_FAT	GO:0004866~endopeptidase inhibitor activity	14	0.664452	0.0500734	Y57G11C.5, ZK287.4, C54D10.10, Y73F8A.20, R01H2.4, SRP-1, C02F12.5, MLT-11, C31H1.2, CPI-1, F44G3.7, SPON-1, F29G6.1, TAG-290	632	84	6686	1.76319	1	0.502313	50.1006
PIR_SUPERFAMILY	PIRSF017548:uncharacterized protein	3	0.142383	0.050715	Y45F10C.4, C08F11.12, Y45F10C.2	448	4	4541	7.60212	0.999999	0.510783	49.3742
GOTERM_MF_FAT	GO:0004867~serine-type endopeptidase inhibitor activity	13	0.616991	0.0512497	C31H1.2, Y57G11C.5, ZK287.4, C54D10.10, F44G3.7, Y73F8A.20, SPON-1, R01H2.4, F29G6.1, SRP-1, TAG-290, C02F12.5, MLT-11	632	76	6686	1.80959	1	0.496428	50.9303
KEGG_PATHWAY	cel00980:Metabolism of xenobiotics by cytochrome P450	4	0.189843	0.0525418	GST-2, GST-38, GST-8, GST-6	52	26	1534	4.53846	0.94577	0.340557	41.0655
INTERPRO	IPR000175:Sodium:neurotransmitter symporter	5	0.237304	0.0526615	SNF-10, SNF-8, SNF-5, SNF-2, F56F4.3	1253	16	13633	3.40009	1	0.5122	55.7038
INTERPRO	IPR002602:Protein of unknown function DB	6	0.284765	0.054027	C42D4.3, Y65B4BL.1, Y53F4B.25, F26G1.5, DAO-2, F35B3.4	1253	23	13633	2.83834	1	0.514747	56.6552
INTERPRO	IPR002656:Acyltransferase 3	11	0.522069	0.0548576	OAC-32, OAC-14, OAC-31, OAC-49, OAC-23, OAC-22, OAC-58, OAC-51, OAC-19, OAC-52, OAC-40	1253	62	13633	1.93037	1	0.513694	57.2245
INTERPRO	IPR017871:ABC transporter, conserved site	10	0.474608	0.0558547	PGP-13, PGP-7, PMP-1, PGP-14, WHT-3, PGP-12, ABT-5, WHT-6, PGP-8, PGP-3	1253	54	13633	2.01487	1	0.51376	57.8987
GOTERM_BP_FAT	GO:0007018~microtubule-based movement	8	0.379687	0.0561427	KLP-6, KLP-17, TBA-8, MEC-12, CHE-3, TBB-6, MEC-7, IFT-81	582	47	7838	2.29232	1	0.924498	57.6128
INTERPRO	IPR013078:Phosphoglycerate mutase	4	0.189843	0.0567768	F53B6.7, F09C12.8, C52E4.7, F55A11.11	1253	10	13633	4.35211	1	0.513353	58.5134
GOTERM_MF_FAT	GO:0005328~neurotransmitter:sodium symporter activity	5	0.237304	0.0571661	SNF-10, SNF-8, SNF-5, SNF-2, F56F4.3	632	16	6686	3.30597	1	0.521969	54.9132
GOTERM_BP_3	GO:0007018~microtubule-based movement	8	0.379687	0.0577736	KLP-6, KLP-17, TBA-8, MEC-12, CHE-3, TBB-6, MEC-7, IFT-81	591	47	7908	2.27757	1	0.824305	54.125
GOTERM_MF_FAT	GO:0004857~enzyme inhibitor activity	15	0.711913	0.06098	Y57G11C.5, ZK287.4, C54D10.10, Y73F8A.20, R01H2.4, T01D3.3, SRP-1, C02F12.5, MLT-11, C31H1.2, CPI-1, F44G3.7, SPON-1, F29G6.1, TAG-290	632	95	6686	1.67039	1	0.532185	57.3196
INTERPRO	IPR017975:Tubulin, conserved site	5	0.237304	0.0640349	TBA-8, MEC-12, Y113G7C.1, TBB-6, MEC-7	1253	17	13633	3.20008	1	0.551161	63.0671
GOTERM_BP_5	GO:0006820~anion transport	6	0.284765	0.0648523	SULP-7, ZK563.2, ICL-1, SULP-4, CLH-4, ABTS-2	480	31	6749	2.72137	1	0.874127	59.8716
INTERPRO	IPR002110:Ankyrin	14	0.664452	0.0670282	F26D2.10, F36D3.5, OSM-9, F56H1.3, C01G10.1, C18H2.5, T08G3.7, C38D9.5, M60.7, F37A4.4, Y67A10A.3, ZK792.4, C18H2.1, F40E12.2	1253	90	13633	1.69249	1	0.561934	64.8056
KEGG_PATHWAY	cel00982:Drug metabolism	4	0.189843	0.0689008	GST-2, GST-38, GST-8, GST-6	52	29	1534	4.06897	0.978827	0.382378	50.3102
KEGG_PATHWAY	cel00640:Propanoate metabolism	4	0.189843	0.0689008	ACDH-7, ACDH-8, ECH-7, T02G5.4	52	29	1534	4.06897	0.978827	0.382378	50.3102
GOTERM_BP_FAT	GO:0048610~reproductive cellular process	11	0.522069	0.0703424	Y57G11A.2, Y39F10C.1, SPE-8, Y54E2A.9, C08G5.3, T02H6.9, SPE-10, SPE-4, T02H6.7, T02G5.11, R105.1	582	80	7838	1.85176	1	0.952355	66.1593
INTERPRO	IPR013069:BTB/POZ	15	0.711913	0.0727808	BTB-2, F47D12.7, F55B11.7, B0496.1, KEL-10, BTB-17, BTB-16, BTB-8, ZC204.12, BATH-26, F27C8.5, BTB-12, BTB-13, C17H12.12, BATH-46	1253	100	13633	1.63204	1	0.586761	67.934
GOTERM_BP_3	GO:0048610~reproductive cellular process	11	0.522069	0.0728114	Y57G11A.2, Y39F10C.1, SPE-8, Y54E2A.9, C08G5.3, T02H6.9, SPE-10, SPE-4, T02H6.7, T02G5.11, R105.1	591	80	7908	1.83985	1	0.863063	62.8395
GOTERM_MF_3	GO:0004497~monooxygenase activity	14	0.664452	0.0728876	DAF-9, Y73F4A.3, CYP-34A4, Y73F4A.2, CYP-34A10, CYP-13A10, CYP-13A7, CYP-25A1, CYP-33E2, CYP-14A2, C09F9.2, CYP-29A4, CYP-33C8, CYP-14A3	567	107	7243	1.6714	0.996573	0.376872	54.8089
INTERPRO	IPR009676:Protein of unknown function DUF1265	4	0.189843	0.0728942	Y49F6B.8, C25G4.8, C50E10.2, F41C3.1	1253	11	13633	3.95647	1	0.581219	67.9931
GOTERM_BP_4	GO:0006820~anion transport	6	0.284765	0.072905	SULP-7, ZK563.2, ICL-1, SULP-4, CLH-4, ABTS-2	565	31	7683	2.63192	1	0.916617	64.6575
SP_PIR_KEYWORDS	cleavage on pair of basic residues	7	0.332226	0.0742972	INS-7, FLP-1, DAF-7, NLP-28, FLP-13, FLP-3, INS-6	2048	29	19674	2.3188	0.999999	0.562429	61.4298
GOTERM_BP_FAT	GO:0006820~anion transport	6	0.284765	0.0753707	SULP-7, ZK563.2, ICL-1, SULP-4, CLH-4, ABTS-2	582	31	7838	2.60658	1	0.95339	68.7788
INTERPRO	IPR000210:BTB/POZ-like	20	0.949217	0.0761141	F22E5.6, F55B11.7, BTB-2, F47D12.7, B0496.1, KEL-10, BTB-17, BTB-16, SDZ-35, B0281.6, BTB-8, T05E12.3, F27C8.5, ZK418.2, BTB-12, BTB-13, C17H12.12, F22E5.12, F22E5.8, BATH-46	1253	146	13633	1.49045	1	0.591594	69.626
INTERPRO	IPR018499:Tetraspanin	5	0.237304	0.0765796	TSP-5, TSP-16, TSP-19, TSP-3, TSP-10	1253	18	13633	3.0223	1	0.587969	69.8555
GOTERM_BP_3	GO:0005975~carbohydrate metabolic process	31	1.47129	0.0767552	LYS-5, T09B9.3, Y5H2B.1, F55C5.2, GPD-3, FUT-5, UGT-25, FUT-2, UGT-47, Y50E8A.6, LYS-7, C09F9.2, UGT-40, F54C1.1, Y73F4A.3, Y73F4A.2, UGT-16, Y105E8B.9, AMAN-3, UGT-11, UGT-30, UGT-2, UGT-13, UGT-54, HEX-1, UGT-36, LYS-10, C05C8.7, UGT-4, UGT-8, UGT-7	591	308	7908	1.34676	1	0.851831	64.8568
GOTERM_BP_2	GO:0048610~reproductive cellular process	11	0.522069	0.0770349	Y57G11A.2, Y39F10C.1, SPE-8, Y54E2A.9, C08G5.3, T02H6.9, SPE-10, SPE-4, T02H6.7, T02G5.11, R105.1	613	80	8116	1.82047	0.99967	0.798764	58.9248
GOTERM_MF_2	GO:0005326~neurotransmitter transporter activity	5	0.237304	0.0771127	SNF-10, SNF-8, SNF-5, SNF-2, F56F4.3	734	20	8884	3.02589	0.962753	0.306202	52.2169
GOTERM_MF_FAT	GO:0016298~lipase activity	10	0.474608	0.0771281	Y46H3A.4, Y51A2B.4, ZK262.3, T28C6.5, M110.7, F25A2.1, F44B9.10, K11E4.1, ASM-2, C31H1.5	632	56	6686	1.88913	1	0.607223	66.2492
GOTERM_CC_2	GO:0043228~non-membrane-bounded organelle	58	2.75273	0.0781924	F38H4.6, MSP-31, Y48B6A.5, MSP-33, MSP-36, MSP-38, C44C10.4, MEC-12, MSP-113, HIS-59, C15H11.1, F54H5.3, TBA-8, MSP-3, C10H11.7, C35E7.9, TBB-6, MSP-40, F13A7.1, MSP-152, IFP-1, T22B3.3, HIS-61, TNC-2, PTL-1, HIS-64, W03D8.5, Y53F4B.19, Y113G7C.1, DLC-4, DLC-6, SPE-26, F21H7.5, MSP-142, F42A9.7, F55D12.6, MEC-7, MSP-56, F57A10.2, MSP-57, MAX-1, MLC-2, MSP-59, MSP-53, F36D3.4, MSP-19, MSP-55, HIS-…	837	535	9458	1.22503	0.91986	0.467938	50.3145
GOTERM_CC_3	GO:0043232~intracellular non-membrane-bounded organelle	58	2.75273	0.0781924	F38H4.6, MSP-31, Y48B6A.5, MSP-33, MSP-36, MSP-38, C44C10.4, MEC-12, MSP-113, HIS-59, C15H11.1, F54H5.3, TBA-8, MSP-3, C10H11.7, C35E7.9, TBB-6, MSP-40, F13A7.1, MSP-152, IFP-1, T22B3.3, HIS-61, TNC-2, PTL-1, HIS-64, W03D8.5, Y53F4B.19, Y113G7C.1, DLC-4, DLC-6, SPE-26, F21H7.5, MSP-142, F42A9.7, F55D12.6, MEC-7, MSP-56, F57A10.2, MSP-57, MAX-1, MLC-2, MSP-59, MSP-53, F36D3.4, MSP-19, MSP-55, HIS-…	837	535	9458	1.22503	0.996914	0.618428	57.0468
GOTERM_MF_5	GO:0008509~anion transmembrane transporter activity	8	0.379687	0.0802233	SULP-7, GLT-5, TTYH-1, GLT-6, ZK563.2, SULP-4, CLH-4, ABTS-2	449	42	4951	2.10033	0.999504	0.781717	59.8146
SP_PIR_KEYWORDS	hydrolase	69	3.2748	0.080344	Y71G12B.30, CRN-6, ZK484.7, W03F11.4, C06A1.3, DPF-2, F23B12.1, T22C1.8, F52H3.6, Y40H4A.2, Y54G2A.24, F36H1.3, T20B6.1, Y113G7C.1, C02B10.6, T19D7.7, NAS-38, K07C11.7, F20H11.4, C34D4.2, PAF-1, C17H12.3, ZK262.3, ZMP-1, ASM-2, C27A7.1, C27B7.6, C15H7.3, T16G12.7, Y22D7AR.12, R08C7.8, M04G7.2, T19D2.1, NAS-25, ZC477.2, GSP-3, C33H5.16, F26C11.1, GSP-4, Y69E1A.4, R08A2.2, K09F6.3, T28F4.3, F49E11.…	2048	553	19674	1.19863	1	0.571242	64.4262
GOTERM_MF_FAT	GO:0008138~protein tyrosine/serine/threonine phosphatase activity	6	0.284765	0.0803706	F54F12.1, T20B6.1, Y69A2AR.19, H06I04.5, T28F4.3, F47B3.7	632	25	6686	2.53899	1	0.610096	67.8191
INTERPRO	IPR015897:CHK kinase-like	6	0.284765	0.0843021	D1044.1, H06H21.8, Y11D7A.8, F20D6.5, T16G1.5, E02C12.6	1253	26	13633	2.51084	1	0.61885	73.4349
GOTERM_BP_5	GO:0015698~inorganic anion transport	5	0.237304	0.0860303	SULP-7, ZK563.2, ICL-1, SULP-4, CLH-4	480	24	6749	2.92925	1	0.921825	70.6251
SMART	SM00248:ANK	14	0.664452	0.0864919	F26D2.10, F36D3.5, OSM-9, F56H1.3, C01G10.1, C18H2.5, T08G3.7, C38D9.5, M60.7, F37A4.4, Y67A10A.3, ZK792.4, C18H2.1, F40E12.2	532	90	5537	1.61901	0.999991	0.589637	65.0264
INTERPRO	IPR004987:Protein of unknown function DUF272	4	0.189843	0.090787	F58F9.4, C49A9.4, C49A9.3, C49A9.1	1253	12	13633	3.62676	1	0.641604	76.13
INTERPRO	IPR006153:Cation/H+ exchanger	4	0.189843	0.090787	NHX-9, F41E7.1, PBO-4, NHX-1	1253	12	13633	3.62676	1	0.641604	76.13
GOTERM_MF_FAT	GO:0008509~anion transmembrane transporter activity	8	0.379687	0.0958007	SULP-7, GLT-5, TTYH-1, GLT-6, ZK563.2, SULP-4, CLH-4, ABTS-2	632	42	6686	2.01507	1	0.665237	74.4051
COG_ONTOLOGY	Amino acid transport and metabolism	7	0.332226	0.096	T25D3.3, F38H4.5, T07F10.1, HDL-1, AC3.5, AAT-7, F01D4.8	73	50	1118	2.14411	0.879902	0.345503	54.1266
INTERPRO	IPR012877:Uncharacterised kinase D1044.1	6	0.284765	0.0960221	D1044.1, H06H21.8, Y11D7A.8, F20D6.5, T16G1.5, E02C12.6	1253	27	13633	2.41784	1	0.657549	78.117
SMART	SM00587:CHK	6	0.284765	0.097105	D1044.1, H06H21.8, Y11D7A.8, F20D6.5, T16G1.5, E02C12.6	532	26	5537	2.40182	0.999998	0.606995	69.4648
GOTERM_BP_FAT	GO:0015698~inorganic anion transport	5	0.237304	0.0974215	SULP-7, ZK563.2, ICL-1, SULP-4, CLH-4	582	24	7838	2.8057	1	0.977049	78.1862
INTERPRO	IPR002593:Protein of unknown function DX	3	0.142383	0.0985364	K05F1.1, T10E9.4, F57A8.6	1253	6	13633	5.44014	1	0.661932	79.0154

## Sheet: AWK33.g1_vs_CF3050
Category	Term	Count	%	PValue	Genes	List Total	Pop Hits	Pop Total	Fold Enrichment	Bonferroni	Benjamini	FDR
INTERPRO	IPR002900:Protein of unknown function DUF38, Caenorhabditis species	7	8.23529	6.33907e-05	FBXA-192, FBXA-125, Y20C6A.1, K10G4.5, FBXA-188, FBXA-189, F47H4.2	43	227	13633	9.77676	0.00430143	0.00430143	0.0651954
INTERPRO	IPR002083:MATH	5	5.88235	0.000137605	BATH-1, BATH-24, MATH-44, BATH-21, MATH-38	43	86	13633	18.4329	0.00931411	0.00466795	0.141473
INTERPRO	IPR001810:Cyclin-like F-box	8	9.41176	0.000239937	FBXA-192, FBXA-193, Y20C6A.1, K10G4.5, FBXA-188, FBXA-189, FBXB-90, F47H4.2	43	413	13633	6.14134	0.0161853	0.00542446	0.246566
SMART	SM00061:MATH	5	5.88235	0.000958076	BATH-1, BATH-24, MATH-44, BATH-21, MATH-38	30	86	5537	10.7306	0.019928	0.019928	0.737388
SMART	SM00256:FBOX	8	9.41176	0.00451024	FBXA-192, FBXA-193, Y20C6A.1, K10G4.5, FBXA-188, FBXA-189, FBXB-90, F47H4.2	30	413	5537	3.57514	0.0905628	0.0463558	3.43019
INTERPRO	IPR011333:BTB/POZ fold	4	4.70588	0.0125989	SKR-5, BATH-1, BATH-24, BATH-21	43	158	13633	8.02649	0.577755	0.193896	12.2289
INTERPRO	IPR013069:BTB/POZ	3	3.52941	0.0379255	BATH-1, BATH-24, BATH-21	43	100	13633	9.5114	0.927858	0.408931	32.8176
GOTERM_BP_4	GO:0019538~protein metabolic process	7	8.23529	0.0607661	R10F2.6, SKR-5, F52C6.12, AEX-5, Y54F10BM.3, TAG-344, C08F11.7	16	1536	7683	2.18835	0.97675	0.97675	46.6483
INTERPRO	IPR000210:BTB/POZ-like	3	3.52941	0.074274	BATH-1, BATH-24, BATH-21	43	146	13633	6.51465	0.994742	0.583002	54.7956
GOTERM_MF_FAT	GO:0016791~phosphatase activity	3	3.52941	0.0888184	H25K10.1, R10F2.6, Y54F10BM.3	16	225	6686	5.57167	0.988491	0.988491	58.8389
GOTERM_BP_3	GO:0019538~protein metabolic process	7	8.23529	0.0940854	R10F2.6, SKR-5, F52C6.12, AEX-5, Y54F10BM.3, TAG-344, C08F11.7	18	1536	7908	2.00217	0.995637	0.995637	62.1629

## Sheet: AWK43.g2_vs_CF3050
Category	Term	Count	%	PValue	Genes	List Total	Pop Hits	Pop Total	Fold Enrichment	Bonferroni	Benjamini	FDR
GOTERM_BP_4	GO:0006796~phosphate metabolic process	192	7.82396	6.49335e-52	R06B10.1, K06H7.8, VY10G11R.1, CKK-1, DIG-1, C18H7.4, ZK666.8, F26A1.3, TAG-191, CDK-4, R10D12.10, ZK484.7, H12I13.1, F01D4.3, EAK-6, C03C10.2, W09C3.1, C14A4.13, W06F12.3, C27D8.1, F54H5.2, T22C1.8, F26E4.5, ZK596.2, W03A5.1, ZK809.1, C09B9.4, T26E3.7, C07E3.4, ZC581.7, F57B9.8, F42C5.5, F55H12.5, OLD-1, R13H9.6, TPA-1, R13H9.5, M7.7, F26A3.4, ZC581.2, F20H11.4, F26A1.4, KIN-21, KIN-24, Y80D3A.8…	722	665	7683	3.07237	3.03239e-49	3.03239e-49	9.26089e-49
GOTERM_BP_FAT	GO:0006796~phosphate metabolic process	192	7.82396	2.53583e-51	R06B10.1, K06H7.8, VY10G11R.1, CKK-1, DIG-1, C18H7.4, ZK666.8, F26A1.3, TAG-191, CDK-4, R10D12.10, ZK484.7, H12I13.1, F01D4.3, EAK-6, C03C10.2, W09C3.1, C14A4.13, W06F12.3, C27D8.1, F54H5.2, T22C1.8, F26E4.5, ZK596.2, W03A5.1, ZK809.1, C09B9.4, T26E3.7, C07E3.4, ZC581.7, F57B9.8, F42C5.5, F55H12.5, OLD-1, R13H9.6, TPA-1, R13H9.5, M7.7, F26A3.4, ZC581.2, F20H11.4, F26A1.4, KIN-21, KIN-24, Y80D3A.8…	741	665	7838	3.05398	2.0667e-48	2.0667e-48	3.90201e-48
GOTERM_BP_FAT	GO:0006793~phosphorus metabolic process	192	7.82396	2.53583e-51	R06B10.1, K06H7.8, VY10G11R.1, CKK-1, DIG-1, C18H7.4, ZK666.8, F26A1.3, TAG-191, CDK-4, R10D12.10, ZK484.7, H12I13.1, F01D4.3, EAK-6, C03C10.2, W09C3.1, C14A4.13, W06F12.3, C27D8.1, F54H5.2, T22C1.8, F26E4.5, ZK596.2, W03A5.1, ZK809.1, C09B9.4, T26E3.7, C07E3.4, ZC581.7, F57B9.8, F42C5.5, F55H12.5, OLD-1, R13H9.6, TPA-1, R13H9.5, M7.7, F26A3.4, ZC581.2, F20H11.4, F26A1.4, KIN-21, KIN-24, Y80D3A.8…	741	665	7838	3.05398	2.0667e-48	2.0667e-48	3.90201e-48
GOTERM_BP_3	GO:0006793~phosphorus metabolic process	192	7.82396	7.90051e-51	R06B10.1, K06H7.8, VY10G11R.1, CKK-1, DIG-1, C18H7.4, ZK666.8, F26A1.3, TAG-191, CDK-4, R10D12.10, ZK484.7, H12I13.1, F01D4.3, EAK-6, C03C10.2, W09C3.1, C14A4.13, W06F12.3, C27D8.1, F54H5.2, T22C1.8, F26E4.5, ZK596.2, W03A5.1, ZK809.1, C09B9.4, T26E3.7, C07E3.4, ZC581.7, F57B9.8, F42C5.5, F55H12.5, OLD-1, R13H9.6, TPA-1, R13H9.5, M7.7, F26A3.4, ZC581.2, F20H11.4, F26A1.4, KIN-21, KIN-24, Y80D3A.8…	752	665	7908	3.03619	2.48076e-48	2.48076e-48	1.06309e-47
GOTERM_BP_5	GO:0006464~protein modification process	191	7.78321	1.73882e-50	R06B10.1, K06H7.8, VY10G11R.1, CKK-1, C18H7.4, ZK666.8, F26A1.3, TAG-191, CDK-4, R10D12.10, ZK484.7, H12I13.1, F01D4.3, EAK-6, C03C10.2, W09C3.1, C14A4.13, W06F12.3, C27D8.1, UBC-24, F54H5.2, T22C1.8, F26E4.5, ZK596.2, W03A5.1, ZK809.1, C09B9.4, C07E3.4, ZC581.7, F57B9.8, F42C5.5, F55H12.5, OLD-1, R13H9.6, TPA-1, R13H9.5, M7.7, F26A3.4, ZC581.2, F20H11.4, F26A1.4, KIN-21, KIN-24, Y80D3A.8, F22B3.…	608	711	6749	2.98194	7.77255e-48	7.77255e-48	2.46451e-47
GOTERM_BP_4	GO:0043412~biopolymer modification	191	7.78321	1.59732e-43	R06B10.1, K06H7.8, VY10G11R.1, CKK-1, C18H7.4, ZK666.8, F26A1.3, TAG-191, CDK-4, R10D12.10, ZK484.7, H12I13.1, F01D4.3, EAK-6, C03C10.2, W09C3.1, C14A4.13, W06F12.3, C27D8.1, UBC-24, F54H5.2, T22C1.8, F26E4.5, ZK596.2, W03A5.1, ZK809.1, C09B9.4, C07E3.4, ZC581.7, F57B9.8, F42C5.5, F55H12.5, OLD-1, R13H9.6, TPA-1, R13H9.5, M7.7, F26A3.4, ZC581.2, F20H11.4, F26A1.4, KIN-21, KIN-24, Y80D3A.8, F22B3.…	722	740	7683	2.7466	7.4595e-41	3.72975e-41	2.27812e-40
INTERPRO	IPR003125:Protein of unknown function WSN	47	1.91524	1.13861e-35	M70.3, R06B10.1, Y22D7AR.14, H04J21.1, M70.1, C06C6.7, F36D3.5, C06C6.6, NHR-266, Y22D7AR.12, Y39B6A.18, K09D9.11, F56H1.3, C01G10.1, F36G9.13, C01G5.4, D1065.3, W03F11.4, K09F6.3, B0524.4, F58D5.6, C18H2.5, C18H2.4, T08G3.7, C38D9.5, H20J04.1, Y57G7A.6, Y67A10A.3, Y69A2AR.19, C18H2.1, F40E12.2, F26D2.10, C09B9.7, T20B6.2, T16A1.2, Y48G1C.5, Y113G7C.1, R155.4, H06I04.5, F07E5.8, C08G5.1, Y53H1C.3…	1453	56	13633	7.87473	9.5074e-33	9.5074e-33	1.7576e-32
GOTERM_MF_FAT	GO:0004721~phosphoprotein phosphatase activity	83	3.38223	8.17342e-34	R06B10.1, Y71G12B.31, Y71G12B.30, F38H4.4, ZK484.7, W03F11.4, C06A1.3, EAK-6, F23B12.1, T22C1.8, Y116A8C.37, F52H3.6, C50F2.5, ZK809.1, W01B6.6, Y57G11C.6, Y54G2A.24, F36H1.3, T20B6.1, C07E3.4, F42C5.5, Y113G7C.1, F55H12.5, W03D8.2, F26A3.4, F20H11.4, C34D4.2, C17H12.3, C17H12.5, Y80D3A.8, Y39B6A.30, F26B1.5, C27B7.6, IDA-1, M05B5.1, C15H7.3, T16G12.7, Y22D7AR.12, C48B6.4, Y39B6A.18, Y22D7AR.7, M…	753	173	6686	4.25994	2.87704e-31	2.87704e-31	1.11881e-30
SMART	SM00453:WSN	47	1.91524	4.13466e-33	M70.3, R06B10.1, Y22D7AR.14, H04J21.1, M70.1, C06C6.7, F36D3.5, C06C6.6, NHR-266, Y22D7AR.12, Y39B6A.18, K09D9.11, F56H1.3, C01G10.1, F36G9.13, C01G5.4, D1065.3, W03F11.4, K09F6.3, B0524.4, F58D5.6, C18H2.5, C18H2.4, T08G3.7, C38D9.5, H20J04.1, Y57G7A.6, Y67A10A.3, Y69A2AR.19, C18H2.1, F40E12.2, F26D2.10, C09B9.7, T20B6.2, T16A1.2, Y48G1C.5, Y113G7C.1, R155.4, H06I04.5, F07E5.8, C08G5.1, Y53H1C.3…	684	56	5537	6.79404	7.31835e-31	7.31835e-31	5.07856e-30
GOTERM_BP_FAT	GO:0006468~protein amino acid phosphorylation	125	5.09372	7.0628e-32	K06H7.8, VY10G11R.1, CKK-1, C18H7.4, ZK666.8, F26A1.3, TAG-191, CDK-4, R10D12.10, H12I13.1, F01D4.3, W09C3.1, C03C10.2, C14A4.13, W06F12.3, C27D8.1, F54H5.2, F26E4.5, ZK596.2, W03A5.1, C09B9.4, ZC581.7, F57B9.8, OLD-1, R13H9.6, R13H9.5, TPA-1, ZC581.2, M7.7, F26A1.4, KIN-21, KIN-24, F22B3.8, C27D6.11, T19D12.5, B0207.7, C56C10.6, ZC373.3, Y47G6A.13, Y69E1A.3, H05L14.1, T09B4.7, F21F3.2, KIN-5, OD…	741	437	7838	3.02563	5.75618e-29	2.87809e-29	1.08679e-28
INTERPRO	IPR000242:Protein-tyrosine phosphatase, receptor/non-receptor type	57	2.32274	2.7686e-31	Y71G12B.31, R06B10.1, F38H4.4, ZK484.7, W03F11.4, EAK-6, T22C1.8, Y116A8C.37, C50F2.5, ZK809.1, W01B6.6, Y57G11C.6, F36H1.3, T20B6.1, C07E3.4, F42C5.5, F55H12.5, Y113G7C.1, F20H11.4, C17H12.3, C17H12.5, Y80D3A.8, Y39B6A.30, IDA-1, C15H7.3, M05B5.1, C48B6.4, Y22D7AR.12, Y22D7AR.7, Y39B6A.18, M04G7.2, C33H5.16, K09F6.3, T28F4.3, C46A5.1, T04F3.3, Y54F10BM.3, F35C11.2, C43E11.5, F40G12.10, Y69A2AR.1…	1453	93	13633	5.75066	2.31178e-28	1.15589e-28	4.27372e-28
GOTERM_MF_5	GO:0016791~phosphatase activity	88	3.58598	2.25367e-29	R06B10.1, Y71G12B.31, Y71G12B.30, F38H4.4, ZK484.7, W03F11.4, C06A1.3, EAK-6, F23B12.1, T22C1.8, Y116A8C.37, F52H3.6, C50F2.5, ZK809.1, W01B6.6, Y57G11C.6, Y54G2A.24, F36H1.3, T20B6.1, C07E3.4, F42C5.5, Y113G7C.1, F55H12.5, W03D8.2, F26A3.4, F20H11.4, C34D4.2, C17H12.3, C17H12.5, Y80D3A.8, Y105C5B.15, Y39B6A.30, F26B1.5, C27B7.6, IDA-1, M05B5.1, C15H7.3, T16G12.7, Y22D7AR.12, C48B6.4, Y39B6A.18, …	540	225	4951	3.58591	2.43397e-27	2.43397e-27	2.53764e-26
GOTERM_BP_5	GO:0044267~cellular protein metabolic process	214	8.72046	3.98322e-29	VY10G11R.1, CKK-1, TAG-191, R10D12.10, ZK484.7, H12I13.1, SKR-10, EAK-6, C14A4.13, C27D8.1, SKR-15, F54H5.2, T22C1.8, SKR-12, SKR-13, FBXB-54, W03A5.1, C09B9.4, C07E3.4, CYN-10, F57B9.8, F42C5.5, OLD-1, F55H12.5, M7.7, KIN-21, KIN-24, C27D6.11, F55D12.6, T19D12.5, IDA-1, B0207.7, C56C10.6, R09E10.9, C33H5.16, K09F6.3, C46A5.1, T04F3.3, Y54F10BM.3, F21F3.2, Y69A2AR.19, B0207.1, ODR-1, Y65B4A.9, NE…	608	1167	6749	2.03554	1.7805e-26	8.9025e-27	5.64558e-26
GOTERM_MF_4	GO:0042578~phosphoric ester hydrolase activity	91	3.70823	1.52542e-28	R06B10.1, Y71G12B.31, Y71G12B.30, F38H4.4, F55C5.2, ZK484.7, W03F11.4, C06A1.3, EAK-6, F23B12.1, T22C1.8, Y116A8C.37, F52H3.6, C50F2.5, ZK809.1, W01B6.6, Y57G11C.6, Y54G2A.24, F36H1.3, T20B6.1, C07E3.4, F42C5.5, Y113G7C.1, F55H12.5, W03D8.2, F26A3.4, F20H11.4, C34D4.2, C17H12.3, C17H12.5, Y80D3A.8, Y105C5B.15, Y39B6A.30, F26B1.5, C27B7.6, IDA-1, M05B5.1, C15H7.3, T16G12.7, Y22D7AR.12, C48B6.4, Y3…	627	256	6132	3.47645	1.55593e-26	1.55593e-26	1.69943e-25
SMART	SM00194:PTPc	57	2.32274	2.14866e-28	Y71G12B.31, R06B10.1, F38H4.4, ZK484.7, W03F11.4, EAK-6, T22C1.8, Y116A8C.37, C50F2.5, ZK809.1, W01B6.6, Y57G11C.6, F36H1.3, T20B6.1, C07E3.4, F42C5.5, F55H12.5, Y113G7C.1, F20H11.4, C17H12.3, C17H12.5, Y80D3A.8, Y39B6A.30, IDA-1, C15H7.3, M05B5.1, C48B6.4, Y22D7AR.12, Y22D7AR.7, Y39B6A.18, M04G7.2, C33H5.16, K09F6.3, T28F4.3, C46A5.1, T04F3.3, Y54F10BM.3, F35C11.2, C43E11.5, F40G12.10, Y69A2AR.1…	684	93	5537	4.96147	3.80313e-26	1.90156e-26	2.63918e-25
GOTERM_BP_FAT	GO:0006470~protein amino acid dephosphorylation	60	2.44499	2.23466e-28	Y71G12B.31, R06B10.1, F38H4.4, ZK484.7, W03F11.4, EAK-6, T22C1.8, Y116A8C.37, C50F2.5, ZK809.1, W01B6.6, Y57G11C.6, F36H1.3, T20B6.1, C07E3.4, F42C5.5, F55H12.5, Y113G7C.1, F26A3.4, F20H11.4, C17H12.3, C17H12.5, Y80D3A.8, Y39B6A.30, IDA-1, C15H7.3, M05B5.1, C48B6.4, Y22D7AR.12, Y22D7AR.7, Y39B6A.18, M04G7.2, C33H5.16, R09E10.9, CDC-25.4, K09F6.3, T28F4.3, C46A5.1, T04F3.3, F35C11.2, Y54F10BM.3, C…	741	125	7838	5.07725	1.82125e-25	6.07082e-26	3.43858e-25
GOTERM_BP_5	GO:0016310~phosphorylation	127	5.17522	2.91792e-28	K06H7.8, VY10G11R.1, CKK-1, C18H7.4, ZK666.8, F26A1.3, TAG-191, CDK-4, R10D12.10, H12I13.1, F01D4.3, W09C3.1, C03C10.2, C14A4.13, W06F12.3, C27D8.1, F54H5.2, F26E4.5, ZK596.2, W03A5.1, C09B9.4, T26E3.7, ZC581.7, F57B9.8, OLD-1, R13H9.6, R13H9.5, TPA-1, ZC581.2, M7.7, F26A1.4, KIN-21, KIN-24, F22B3.8, C27D6.11, T19D12.5, B0207.7, C56C10.6, ZC373.3, Y47G6A.13, Y69E1A.3, H05L14.1, T09B4.7, F21F3.2, …	608	514	6749	2.74269	1.30431e-25	4.3477e-26	4.13569e-25
GOTERM_BP_4	GO:0019538~protein metabolic process	265	10.7987	3.20322e-28	VY10G11R.1, CKK-1, Y71H2AM.25, TAG-191, R10D12.10, ZK484.7, H12I13.1, EAK-6, SKR-10, Y19D10B.6, C14A4.13, C27D8.1, F54H5.2, SKR-15, SKR-12, T22C1.8, SKR-13, FBXB-54, W03A5.1, WRT-4, WRT-6, C09B9.4, C07E3.4, CYN-10, R03G8.4, F57B9.8, F42C5.5, F55H12.5, OLD-1, NAS-38, M7.7, NAS-32, T28A11.20, KIN-21, KIN-24, NAS-30, NAS-31, K02F6.1, ZMP-1, C27D6.11, F55D12.6, T19D12.5, Y18H1A.9, IDA-1, B0207.7, C56…	722	1536	7683	1.8359	1.4959e-25	4.98635e-26	4.56847e-25
INTERPRO	IPR000535:Major sperm protein	49	1.99674	5.68727e-28	F38H4.6, MSP-31, Y48B6A.5, MSP-33, MSP-36, Y53C10A.15, F13H8.12, MSP-38, MSP-113, Y38F2AR.10, C54E10.1, C15H11.1, F54H5.3, MSP-3, C10H11.7, C35E7.9, SSP-11, SSP-10, MSP-40, F13A7.1, MSP-152, T22B3.3, SSP-19, SSP-16, W03D8.5, Y53F4B.19, C34D4.3, F21H7.5, MSP-142, F42A9.7, C14A4.8, F57A10.2, MSP-56, MSP-57, ZK1307.4, MSP-59, F36D3.4, MSP-53, MSP-19, MSP-55, DCT-9, F58A6.9, MSP-10, ZK546.3, F36H12.3…	1453	77	13633	5.97078	4.74887e-25	1.58296e-25	8.77909e-25
GOTERM_MF_FAT	GO:0016791~phosphatase activity	88	3.58598	8.64284e-28	R06B10.1, Y71G12B.31, Y71G12B.30, F38H4.4, ZK484.7, W03F11.4, C06A1.3, EAK-6, F23B12.1, T22C1.8, Y116A8C.37, F52H3.6, C50F2.5, ZK809.1, W01B6.6, Y57G11C.6, Y54G2A.24, F36H1.3, T20B6.1, C07E3.4, F42C5.5, Y113G7C.1, F55H12.5, W03D8.2, F26A3.4, F20H11.4, C34D4.2, C17H12.3, C17H12.5, Y80D3A.8, Y105C5B.15, Y39B6A.30, F26B1.5, C27B7.6, IDA-1, M05B5.1, C15H7.3, T16G12.7, Y22D7AR.12, C48B6.4, Y39B6A.18, …	753	225	6686	3.47273	3.04228e-25	1.52114e-25	1.18306e-24
GOTERM_BP_5	GO:0016311~dephosphorylation	60	2.44499	1.23267e-27	Y71G12B.31, R06B10.1, F38H4.4, ZK484.7, W03F11.4, EAK-6, T22C1.8, Y116A8C.37, C50F2.5, ZK809.1, W01B6.6, Y57G11C.6, F36H1.3, T20B6.1, C07E3.4, F42C5.5, F55H12.5, Y113G7C.1, F26A3.4, F20H11.4, C17H12.3, C17H12.5, Y80D3A.8, Y39B6A.30, IDA-1, C15H7.3, M05B5.1, C48B6.4, Y22D7AR.12, Y22D7AR.7, Y39B6A.18, M04G7.2, C33H5.16, R09E10.9, CDC-25.4, K09F6.3, T28F4.3, C46A5.1, T04F3.3, F35C11.2, Y54F10BM.3, C…	608	134	6749	4.9703	5.51002e-25	1.37751e-25	1.74711e-24
GOTERM_BP_3	GO:0019538~protein metabolic process	265	10.7987	4.69207e-27	VY10G11R.1, CKK-1, Y71H2AM.25, TAG-191, R10D12.10, ZK484.7, H12I13.1, EAK-6, SKR-10, Y19D10B.6, C14A4.13, C27D8.1, F54H5.2, SKR-15, SKR-12, T22C1.8, SKR-13, FBXB-54, W03A5.1, WRT-4, WRT-6, C09B9.4, C07E3.4, CYN-10, R03G8.4, F57B9.8, F42C5.5, F55H12.5, OLD-1, NAS-38, M7.7, NAS-32, T28A11.20, KIN-21, KIN-24, NAS-30, NAS-31, K02F6.1, ZMP-1, C27D6.11, F55D12.6, T19D12.5, Y18H1A.9, IDA-1, B0207.7, C56…	752	1536	7908	1.81428	1.47331e-24	7.36655e-25	6.31362e-24
INTERPRO	IPR000719:Protein kinase, core	121	4.93073	5.5586e-27	K06H7.8, VY10G11R.1, CKK-1, C18H7.4, ZK666.8, F26A1.3, TAG-191, CDK-4, R10D12.10, H12I13.1, F01D4.3, W09C3.1, C03C10.2, C14A4.13, W06F12.3, C27D8.1, F54H5.2, F26E4.5, ZK596.2, W03A5.1, C09B9.4, ZC581.7, F57B9.8, OLD-1, R13H9.6, R13H9.5, TPA-1, ZC581.2, M7.7, F26A1.4, KIN-21, KIN-24, F22B3.8, C27D6.11, T19D12.5, B0207.7, C56C10.6, ZC373.3, Y47G6A.13, Y69E1A.3, H05L14.1, F21F3.2, KIN-5, ODR-1, T06C…	1453	404	13633	2.81015	4.64143e-24	1.16036e-24	8.58047e-24
GOTERM_MF_FAT	GO:0004725~protein tyrosine phosphatase activity	60	2.44499	1.38989e-26	Y71G12B.31, R06B10.1, F38H4.4, ZK484.7, W03F11.4, EAK-6, T22C1.8, Y116A8C.37, C50F2.5, ZK809.1, W01B6.6, Y57G11C.6, F36H1.3, T20B6.1, C07E3.4, F42C5.5, F55H12.5, Y113G7C.1, F26A3.4, F20H11.4, C17H12.3, C17H12.5, Y80D3A.8, Y39B6A.30, IDA-1, C15H7.3, M05B5.1, C48B6.4, Y22D7AR.12, Y22D7AR.7, Y39B6A.18, M04G7.2, C33H5.16, R09E10.9, CDC-25.4, K09F6.3, T28F4.3, C46A5.1, T04F3.3, F35C11.2, Y54F10BM.3, C…	753	116	6686	4.59266	4.89243e-24	1.63081e-24	1.90254e-23
GOTERM_BP_FAT	GO:0016311~dephosphorylation	60	2.44499	2.25786e-26	Y71G12B.31, R06B10.1, F38H4.4, ZK484.7, W03F11.4, EAK-6, T22C1.8, Y116A8C.37, C50F2.5, ZK809.1, W01B6.6, Y57G11C.6, F36H1.3, T20B6.1, C07E3.4, F42C5.5, F55H12.5, Y113G7C.1, F26A3.4, F20H11.4, C17H12.3, C17H12.5, Y80D3A.8, Y39B6A.30, IDA-1, C15H7.3, M05B5.1, C48B6.4, Y22D7AR.12, Y22D7AR.7, Y39B6A.18, M04G7.2, C33H5.16, R09E10.9, CDC-25.4, K09F6.3, T28F4.3, C46A5.1, T04F3.3, F35C11.2, Y54F10BM.3, C…	741	134	7838	4.73624	1.84015e-23	4.60038e-24	3.47427e-23
GOTERM_MF_5	GO:0004672~protein kinase activity	125	5.09372	7.16057e-26	K06H7.8, VY10G11R.1, CKK-1, C18H7.4, ZK666.8, F26A1.3, TAG-191, CDK-4, R10D12.10, H12I13.1, F01D4.3, W09C3.1, C03C10.2, C14A4.13, W06F12.3, C27D8.1, F54H5.2, F26E4.5, ZK596.2, W03A5.1, C09B9.4, ZC581.7, F57B9.8, OLD-1, R13H9.6, R13H9.5, TPA-1, ZC581.2, M7.7, F26A1.4, KIN-21, KIN-24, F22B3.8, C27D6.11, T19D12.5, B0207.7, C56C10.6, ZC373.3, Y47G6A.13, Y69E1A.3, H05L14.1, T09B4.7, F21F3.2, KIN-5, OD…	540	448	4951	2.55818	7.73341e-24	3.86671e-24	8.0628e-23
GOTERM_BP_FAT	GO:0016310~phosphorylation	127	5.17522	9.08635e-26	K06H7.8, VY10G11R.1, CKK-1, C18H7.4, ZK666.8, F26A1.3, TAG-191, CDK-4, R10D12.10, H12I13.1, F01D4.3, W09C3.1, C03C10.2, C14A4.13, W06F12.3, C27D8.1, F54H5.2, F26E4.5, ZK596.2, W03A5.1, C09B9.4, T26E3.7, ZC581.7, F57B9.8, OLD-1, R13H9.6, R13H9.5, TPA-1, ZC581.2, M7.7, F26A1.4, KIN-21, KIN-24, F22B3.8, C27D6.11, T19D12.5, B0207.7, C56C10.6, ZC373.3, Y47G6A.13, Y69E1A.3, H05L14.1, T09B4.7, F21F3.2, …	741	514	7838	2.61353	7.40537e-23	1.48107e-23	1.39816e-22
GOTERM_BP_4	GO:0044267~cellular protein metabolic process	214	8.72046	1.79864e-25	VY10G11R.1, CKK-1, TAG-191, R10D12.10, ZK484.7, H12I13.1, SKR-10, EAK-6, C14A4.13, C27D8.1, SKR-15, F54H5.2, T22C1.8, SKR-12, SKR-13, FBXB-54, W03A5.1, C09B9.4, C07E3.4, CYN-10, F57B9.8, F42C5.5, OLD-1, F55H12.5, M7.7, KIN-21, KIN-24, C27D6.11, F55D12.6, T19D12.5, IDA-1, B0207.7, C56C10.6, R09E10.9, C33H5.16, K09F6.3, C46A5.1, T04F3.3, Y54F10BM.3, F21F3.2, Y69A2AR.19, B0207.1, ODR-1, Y65B4A.9, NE…	722	1167	7683	1.95136	8.39966e-23	2.09991e-23	2.56524e-22
INTERPRO	IPR008962:PapD-like	44	1.79299	8.1032e-25	F38H4.6, MSP-31, Y48B6A.5, MSP-33, Y53C10A.15, MSP-36, MSP-38, MSP-113, C15H11.1, F54H5.3, MSP-3, C10H11.7, C35E7.9, SSP-11, SSP-10, MSP-40, F13A7.1, MSP-152, T22B3.3, SSP-19, SSP-16, W03D8.5, C34D4.3, F21H7.5, MSP-142, F42A9.7, F57A10.2, MSP-56, MSP-57, ZK1307.4, MSP-59, F36D3.4, MSP-53, MSP-19, MSP-55, DCT-9, F58A6.9, MSP-10, ZK546.3, F36H12.3, MSP-64, MSP-63, MSP-65, SSP-31, Y41C4A.7, F52F12.8…	1453	70	13633	5.89767	6.76618e-22	1.35324e-22	1.25084e-21
GOTERM_CC_3	GO:0031224~intrinsic to membrane	800	32.5998	9.68697e-25	Y37H2A.14, C06G4.4, T24C4.4, Y37H2A.10, ANT-1.3, F56A11.6, ZK39.10, F32B4.1, F32B4.2, Y69A2AR.31, GTL-2, C38D9.5, CLEC-266, R05C11.4, CDH-10, CDH-12, C09B9.7, W01D2.3, C09B9.2, M03E7.3, Y69A2AR.23, K06B4.4, IDA-1, GLT-3, R105.1, NAS-25, K09F6.3, CAH-5, Y69A2AR.14, Y69A2AR.19, T12G3.4, F54E4.2, Y37A1A.2, NAS-14, F20G2.6, F45E10.2, Y37D8A.5, HAF-1, TRP-2, T10E9.6, W04E12.5, W04E12.4, T10E9.4, Y37D8…	958	6608	9458	1.19524	8.04019e-23	8.04019e-23	1.03734e-21
GOTERM_MF_1	GO:0005198~structural molecule activity	127	5.17522	1.0052e-24	Y48B6A.5, Y53C10A.15, F13H8.12, COL-161, DPY-3, Y38F2AR.10, DPY-4, DPY-5, C54E10.1, COL-97, COL-157, C15H11.1, DPY-13, COL-156, F54H5.3, COL-154, COL-153, MSP-3, COL-92, COL-91, IFP-1, MSP-152, COL-90, T22B3.3, COL-13, COL-12, COL-150, Y53F4B.19, COL-145, COL-146, LON-3, C34D4.3, COL-141, COL-88, COL-89, F21H7.5, MSP-142, COL-14, F55D12.6, MSP-19, F40G9.9, R105.1, COL-182, COL-180, F58A6.9, MSP-1…	1012	468	9555	2.56217	9.04678e-24	9.04678e-24	5.78492e-22
INTERPRO	IPR000387:Dual-specific/protein-tyrosine phosphatase, conserved region	48	1.95599	6.37744e-24	R06B10.1, Y71G12B.31, IDA-1, F38H4.4, C15H7.3, M05B5.1, Y22D7AR.12, Y39B6A.18, M04G7.2, C33H5.16, ZK484.7, W03F11.4, K09F6.3, T28F4.3, EAK-6, C46A5.1, T04F3.3, F35C11.2, Y54F10BM.3, T22C1.8, F40G12.10, Y69A2AR.19, B0207.1, ZK809.1, Y57G11C.6, W01B6.6, ZK354.8, F36H1.3, F54F12.1, Y48G1C.5, C24D10.1, Y113G7C.1, H06I04.5, R155.3, C33F10.8, F26A3.4, F47B3.7, F55F8.7, F20H11.4, C17H12.3, C17H12.5, Y80…	1453	86	13633	5.23683	5.32516e-21	8.87527e-22	9.84446e-21
GOTERM_MF_FAT	GO:0004674~protein serine/threonine kinase activity	120	4.88998	6.80048e-24	K06H7.8, VY10G11R.1, CKK-1, C18H7.4, ZK666.8, F26A1.3, TAG-191, CDK-4, R10D12.10, F01D4.3, W09C3.1, C03C10.2, C14A4.13, W06F12.3, C27D8.1, F54H5.2, F26E4.5, ZK596.2, W03A5.1, C09B9.4, ZC581.7, F57B9.8, OLD-1, R13H9.6, R13H9.5, TPA-1, ZC581.2, M7.7, F26A1.4, KIN-21, KIN-24, F22B3.8, C27D6.11, T19D12.5, B0207.7, C56C10.6, ZC373.3, Y47G6A.13, Y69E1A.3, H05L14.1, T09B4.7, F21F3.2, KIN-5, ODR-1, T06C1…	753	418	6686	2.54904	2.39377e-21	5.98443e-22	9.30876e-21
GOTERM_MF_FAT	GO:0004672~protein kinase activity	125	5.09372	1.05354e-23	K06H7.8, VY10G11R.1, CKK-1, C18H7.4, ZK666.8, F26A1.3, TAG-191, CDK-4, R10D12.10, H12I13.1, F01D4.3, W09C3.1, C03C10.2, C14A4.13, W06F12.3, C27D8.1, F54H5.2, F26E4.5, ZK596.2, W03A5.1, C09B9.4, ZC581.7, F57B9.8, OLD-1, R13H9.6, R13H9.5, TPA-1, ZC581.2, M7.7, F26A1.4, KIN-21, KIN-24, F22B3.8, C27D6.11, T19D12.5, B0207.7, C56C10.6, ZC373.3, Y47G6A.13, Y69E1A.3, H05L14.1, T09B4.7, F21F3.2, KIN-5, OD…	753	448	6686	2.47744	3.70846e-21	7.41691e-22	1.44212e-20
GOTERM_MF_4	GO:0016773~phosphotransferase activity, alcohol group as acceptor	127	5.17522	1.83532e-23	K06H7.8, VY10G11R.1, CKK-1, C18H7.4, ZK666.8, F26A1.3, TAG-191, CDK-4, R10D12.10, H12I13.1, F01D4.3, W09C3.1, C03C10.2, C14A4.13, W06F12.3, C27D8.1, F54H5.2, F26E4.5, ZK596.2, W03A5.1, C09B9.4, ZC581.7, F57B9.8, OLD-1, R13H9.6, R13H9.5, TPA-1, ZC581.2, M7.7, F26A1.4, KIN-21, KIN-24, F22B3.8, C27D6.11, T19D12.5, B0207.7, C56C10.6, ZC373.3, Y47G6A.13, Y69E1A.3, H05L14.1, T09B4.7, F21F3.2, ODR-1, KI…	627	510	6132	2.43539	1.87203e-21	9.36014e-22	2.04468e-20
GOTERM_MF_FAT	GO:0005198~structural molecule activity	127	5.17522	6.51219e-23	Y48B6A.5, Y53C10A.15, F13H8.12, COL-161, DPY-3, Y38F2AR.10, DPY-4, DPY-5, C54E10.1, COL-97, COL-157, C15H11.1, DPY-13, COL-156, F54H5.3, COL-154, COL-153, MSP-3, COL-92, COL-91, IFP-1, MSP-152, COL-90, T22B3.3, COL-13, COL-12, COL-150, Y53F4B.19, COL-145, COL-146, LON-3, C34D4.3, COL-141, COL-88, COL-89, F21H7.5, MSP-142, COL-14, F55D12.6, MSP-19, F40G9.9, R105.1, COL-182, COL-180, F58A6.9, MSP-1…	753	468	6686	2.40951	2.29229e-20	3.82049e-21	8.91413e-20
GOTERM_CC_2	GO:0044425~membrane part	807	32.8851	7.29492e-23	Y37H2A.14, C06G4.4, T24C4.4, Y37H2A.10, ANT-1.3, F56A11.6, ZK39.10, F32B4.1, F32B4.2, Y69A2AR.31, GTL-2, C38D9.5, CLEC-266, R05C11.4, CDH-10, CDH-12, C09B9.7, W01D2.3, C09B9.2, M03E7.3, Y69A2AR.23, K06B4.4, IDA-1, GLT-3, R105.1, NAS-25, K09F6.3, CAH-5, Y69A2AR.14, Y69A2AR.19, T12G3.4, F54E4.2, Y37A1A.2, NAS-14, F20G2.6, F45E10.2, Y37D8A.5, HAF-1, TRP-2, T10E9.6, W04E12.5, W04E12.4, T10E9.4, Y37D8…	958	6752	9458	1.17998	2.40732e-21	2.40732e-21	6.36738e-20
GOTERM_CC_3	GO:0044425~membrane part	807	32.8851	7.29492e-23	Y37H2A.14, C06G4.4, T24C4.4, Y37H2A.10, ANT-1.3, F56A11.6, ZK39.10, F32B4.1, F32B4.2, Y69A2AR.31, GTL-2, C38D9.5, CLEC-266, R05C11.4, CDH-10, CDH-12, C09B9.7, W01D2.3, C09B9.2, M03E7.3, Y69A2AR.23, K06B4.4, IDA-1, GLT-3, R105.1, NAS-25, K09F6.3, CAH-5, Y69A2AR.14, Y69A2AR.19, T12G3.4, F54E4.2, Y37A1A.2, NAS-14, F20G2.6, F45E10.2, Y37D8A.5, HAF-1, TRP-2, T10E9.6, W04E12.5, W04E12.4, T10E9.4, Y37D8…	958	6752	9458	1.17998	6.05478e-21	3.02739e-21	7.81188e-20
GOTERM_MF_2	GO:0042302~structural constituent of cuticle	61	2.48574	9.38626e-22	COL-58, COL-161, DPY-3, DPY-4, DPY-5, COL-97, COL-157, COL-156, DPY-13, COL-154, COL-153, COL-111, COL-92, COL-7, COL-91, COL-90, COL-48, COL-13, COL-12, COL-49, BLI-2, COL-150, BLI-1, COL-145, SQT-2, SQT-1, COL-109, COL-146, LON-3, COL-141, COL-88, COL-89, COL-41, COL-14, COL-45, COL-182, COL-180, COL-139, COL-71, COL-175, COL-137, COL-173, COL-138, COL-79, COL-130, COL-77, COL-133, COL-73, COL-…	894	155	8884	3.91083	4.12995e-20	4.12995e-20	8.78155e-19
INTERPRO	IPR002486:Nematode cuticle collagen, N-terminal	61	2.48574	1.13089e-21	COL-58, COL-161, DPY-3, DPY-4, DPY-5, COL-97, COL-157, COL-156, DPY-13, COL-154, COL-153, COL-111, COL-92, COL-7, COL-91, COL-90, COL-48, COL-13, COL-12, COL-49, BLI-2, COL-150, BLI-1, COL-145, SQT-2, SQT-1, COL-109, COL-146, LON-3, COL-141, COL-88, COL-89, COL-41, COL-14, COL-45, COL-182, COL-180, COL-139, COL-71, COL-175, COL-137, COL-173, COL-138, COL-79, COL-130, COL-77, COL-133, COL-73, COL-…	1453	147	13633	3.89348	9.44296e-19	1.34899e-19	1.74569e-18
GOTERM_MF_3	GO:0016772~transferase activity, transferring phosphorus-containing groups	136	5.54197	1.16487e-21	K06H7.8, VY10G11R.1, CKK-1, C18H7.4, ZK666.8, F26A1.3, TAG-191, CDK-4, R10D12.10, H12I13.1, F01D4.3, W09C3.1, C03C10.2, C14A4.13, W06F12.3, C27D8.1, F54H5.2, F26E4.5, ZK596.2, W03A5.1, F43G6.5, K06B9.2, C09B9.4, ZC581.7, F57B9.8, OLD-1, R13H9.6, TPA-1, R13H9.5, M7.7, ZC581.2, D1044.1, F26A1.4, KIN-21, KIN-24, F22B3.8, C27D6.11, T19D12.5, B0207.7, C56C10.6, ZC373.3, Y47G6A.13, Y69E1A.3, H05L14.1, …	679	639	7243	2.27032	8.96948e-20	8.96948e-20	1.229e-18
GOTERM_MF_3	GO:0016788~hydrolase activity, acting on ester bonds	111	4.52323	1.91139e-21	R06B10.1, ZK484.7, H12I13.1, C31H1.5, EAK-6, F23B12.1, Y51A2B.4, T22C1.8, ZK809.1, Y54G2A.24, SUL-2, C07E3.4, F42C5.5, F55H12.5, F26A3.4, F20H11.4, C34D4.2, PAF-1, Y80D3A.8, ZK262.3, Y105C5B.15, Y39B6A.30, F26B1.5, ACE-3, IDA-1, T16G12.7, R09E10.9, F09C8.1, GSP-3, C33H5.16, CDC-25.4, GSP-4, R08A2.2, Y69E1A.4, K09F6.3, F49E11.7, C46A5.1, F29D10.2, T04F3.3, F35C11.2, Y54F10BM.3, C43E11.5, Y69A2AR.1…	679	467	7243	2.53545	1.47177e-19	7.35885e-20	2.01663e-18
GOTERM_MF_4	GO:0016301~kinase activity	129	5.25672	2.4034e-21	K06H7.8, VY10G11R.1, CKK-1, C18H7.4, ZK666.8, F26A1.3, TAG-191, CDK-4, R10D12.10, H12I13.1, F01D4.3, W09C3.1, C03C10.2, C14A4.13, W06F12.3, C27D8.1, F54H5.2, F26E4.5, ZK596.2, W03A5.1, C09B9.4, ZC581.7, F57B9.8, OLD-1, R13H9.6, TPA-1, R13H9.5, ZC581.2, M7.7, D1044.1, F26A1.4, KIN-21, KIN-24, F22B3.8, C27D6.11, T19D12.5, B0207.7, C56C10.6, ZC373.3, Y47G6A.13, Y69E1A.3, H05L14.1, T09B4.7, F21F3.2, …	627	550	6132	2.29383	2.45147e-19	8.17158e-20	2.67757e-18
GOTERM_CC_5	GO:0016021~integral to membrane	799	32.5591	1.62552e-20	Y37H2A.14, C06G4.4, T24C4.4, Y37H2A.10, ANT-1.3, F56A11.6, ZK39.10, F32B4.1, F32B4.2, Y69A2AR.31, GTL-2, C38D9.5, CLEC-266, R05C11.4, CDH-10, CDH-12, C09B9.7, W01D2.3, C09B9.2, M03E7.3, Y69A2AR.23, K06B4.4, IDA-1, GLT-3, R105.1, NAS-25, K09F6.3, CAH-5, Y69A2AR.14, Y69A2AR.19, T12G3.4, F54E4.2, Y37A1A.2, NAS-14, F20G2.6, F45E10.2, Y37D8A.5, HAF-1, TRP-2, T10E9.6, W04E12.5, W04E12.4, T10E9.4, Y37D8…	922	6596	8803	1.15655	1.80433e-18	1.80433e-18	1.83962e-17
GOTERM_CC_5	GO:0031224~intrinsic to membrane	800	32.5998	1.65054e-20	Y37H2A.14, C06G4.4, T24C4.4, Y37H2A.10, ANT-1.3, F56A11.6, ZK39.10, F32B4.1, F32B4.2, Y69A2AR.31, GTL-2, C38D9.5, CLEC-266, R05C11.4, CDH-10, CDH-12, C09B9.7, W01D2.3, C09B9.2, M03E7.3, Y69A2AR.23, K06B4.4, IDA-1, GLT-3, R105.1, NAS-25, K09F6.3, CAH-5, Y69A2AR.14, Y69A2AR.19, T12G3.4, F54E4.2, Y37A1A.2, NAS-14, F20G2.6, F45E10.2, Y37D8A.5, HAF-1, TRP-2, T10E9.6, W04E12.5, W04E12.4, T10E9.4, Y37D8…	922	6608	8803	1.1559	1.8321e-18	9.16051e-19	1.86794e-17
GOTERM_CC_4	GO:0016021~integral to membrane	799	32.5591	3.10266e-20	Y37H2A.14, C06G4.4, T24C4.4, Y37H2A.10, ANT-1.3, F56A11.6, ZK39.10, F32B4.1, F32B4.2, Y69A2AR.31, GTL-2, C38D9.5, CLEC-266, R05C11.4, CDH-10, CDH-12, C09B9.7, W01D2.3, C09B9.2, M03E7.3, Y69A2AR.23, K06B4.4, IDA-1, GLT-3, R105.1, NAS-25, K09F6.3, CAH-5, Y69A2AR.14, Y69A2AR.19, T12G3.4, F54E4.2, Y37A1A.2, NAS-14, F20G2.6, F45E10.2, Y37D8A.5, HAF-1, TRP-2, T10E9.6, W04E12.5, W04E12.4, T10E9.4, Y37D8…	925	6596	8829	1.15621	3.41293e-18	3.41293e-18	3.50547e-17
GOTERM_CC_4	GO:0031224~intrinsic to membrane	800	32.5998	3.16378e-20	Y37H2A.14, C06G4.4, T24C4.4, Y37H2A.10, ANT-1.3, F56A11.6, ZK39.10, F32B4.1, F32B4.2, Y69A2AR.31, GTL-2, C38D9.5, CLEC-266, R05C11.4, CDH-10, CDH-12, C09B9.7, W01D2.3, C09B9.2, M03E7.3, Y69A2AR.23, K06B4.4, IDA-1, GLT-3, R105.1, NAS-25, K09F6.3, CAH-5, Y69A2AR.14, Y69A2AR.19, T12G3.4, F54E4.2, Y37A1A.2, NAS-14, F20G2.6, F45E10.2, Y37D8A.5, HAF-1, TRP-2, T10E9.6, W04E12.5, W04E12.4, T10E9.4, Y37D8…	925	6608	8829	1.15555	3.48016e-18	1.74008e-18	3.57452e-17
GOTERM_CC_2	GO:0016020~membrane	813	33.1296	4.54324e-20	Y37H2A.14, C06G4.4, T24C4.4, Y37H2A.10, ANT-1.3, F56A11.6, ZK39.10, F32B4.1, F32B4.2, Y69A2AR.31, GTL-2, C38D9.5, CLEC-266, R05C11.4, CDH-10, CDH-12, C09B9.7, W01D2.3, C09B9.2, M03E7.3, Y69A2AR.23, K06B4.4, IDA-1, GLT-3, R105.1, NAS-25, K09F6.3, CAH-5, Y69A2AR.14, Y69A2AR.19, T12G3.4, F54E4.2, Y37A1A.2, NAS-14, F20G2.6, F45E10.2, Y37D8A.5, HAF-1, TRP-2, T10E9.6, W04E12.5, T10E9.4, W04E12.4, Y37D8…	958	6918	9458	1.16023	1.49927e-18	7.49634e-19	3.96557e-17
GOTERM_CC_3	GO:0016020~membrane	813	33.1296	4.54324e-20	Y37H2A.14, C06G4.4, T24C4.4, Y37H2A.10, ANT-1.3, F56A11.6, ZK39.10, F32B4.1, F32B4.2, Y69A2AR.31, GTL-2, C38D9.5, CLEC-266, R05C11.4, CDH-10, CDH-12, C09B9.7, W01D2.3, C09B9.2, M03E7.3, Y69A2AR.23, K06B4.4, IDA-1, GLT-3, R105.1, NAS-25, K09F6.3, CAH-5, Y69A2AR.14, Y69A2AR.19, T12G3.4, F54E4.2, Y37A1A.2, NAS-14, F20G2.6, F45E10.2, Y37D8A.5, HAF-1, TRP-2, T10E9.6, W04E12.5, T10E9.4, W04E12.4, Y37D8…	958	6918	9458	1.16023	3.77089e-18	1.25696e-18	4.8652e-17
GOTERM_MF_FAT	GO:0042302~structural constituent of cuticle	61	2.48574	1.94425e-19	COL-58, COL-161, DPY-3, DPY-4, DPY-5, COL-97, COL-157, COL-156, DPY-13, COL-154, COL-153, COL-111, COL-92, COL-7, COL-91, COL-90, COL-48, COL-13, COL-12, COL-49, BLI-2, COL-150, BLI-1, COL-145, SQT-2, SQT-1, COL-109, COL-146, LON-3, COL-141, COL-88, COL-89, COL-41, COL-14, COL-45, COL-182, COL-180, COL-139, COL-71, COL-175, COL-137, COL-173, COL-138, COL-79, COL-130, COL-77, COL-133, COL-73, COL-…	753	155	6686	3.49438	6.84376e-17	9.7768e-18	2.66136e-16
INTERPRO	IPR008160:Collagen triple helix repeat	65	2.64874	4.96145e-19	COL-58, COL-161, DPY-3, DPY-4, DPY-5, COL-97, COL-157, COL-156, DPY-13, COL-154, COL-153, COL-111, COL-92, COL-110, COL-7, COL-91, COL-90, COL-48, COL-13, COL-12, COL-49, BLI-2, COL-150, BLI-1, COL-145, SQT-2, SQT-1, COL-109, COL-146, LON-3, COL-88, COL-141, COL-104, COL-89, COL-41, COL-14, COL-45, COL-81, COL-182, COL-180, COL-139, COL-71, COL-175, COL-137, COL-173, COL-138, COL-79, COL-130, COL…	1453	182	13633	3.35095	4.14281e-16	5.17852e-17	7.65869e-16
GOTERM_CC_4	GO:0044425~membrane part	807	32.8851	2.35282e-18	Y37H2A.14, C06G4.4, T24C4.4, Y37H2A.10, ANT-1.3, F56A11.6, ZK39.10, F32B4.1, F32B4.2, Y69A2AR.31, GTL-2, C38D9.5, CLEC-266, R05C11.4, CDH-10, CDH-12, C09B9.7, W01D2.3, C09B9.2, M03E7.3, Y69A2AR.23, K06B4.4, IDA-1, GLT-3, R105.1, NAS-25, K09F6.3, CAH-5, Y69A2AR.14, Y69A2AR.19, T12G3.4, F54E4.2, Y37A1A.2, NAS-14, F20G2.6, F45E10.2, Y37D8A.5, HAF-1, TRP-2, T10E9.6, W04E12.5, W04E12.4, T10E9.4, Y37D8…	925	6752	8829	1.1408	2.58811e-16	8.62702e-17	2.65828e-15
INTERPRO	IPR017441:Protein kinase, ATP binding site	81	3.30073	4.44276e-18	K06H7.8, VY10G11R.1, C35E7.10, D2024.1, CKK-1, Y69F12A.1, C05C12.1, C18H7.4, ZK666.8, CDK-4, Y73B6A.1, H12I13.1, F01D4.3, C25A8.5, VER-1, C03C10.2, W09C3.1, C14A4.13, W06F12.3, C27D8.1, W02B12.12, B0218.5, TAG-344, F26E4.5, ZK596.2, W03A5.1, Y116A8C.38, FRK-1, F38E1.3, K09B11.5, Y39G8C.2, W01B6.5, ZC581.7, F57B9.8, OLD-1, R13H9.6, TPA-1, ZC581.2, C34F11.5, CMK-1, KIN-21, F59A3.8, Y38H8A.4, F53C3.…	1453	272	13633	2.7941	3.7097e-15	4.12189e-16	6.85801e-15
INTERPRO	IPR006186:Serine/threonine-specific protein phosphatase and bis(5-nucleosyl)-tetraphosphatase	31	1.26324	1.16883e-17	C27B7.6, Y71G12B.30, F40E3.5, T16G12.7, R08C7.8, ZC477.2, GSP-3, GSP-4, C06A1.3, R08A2.2, F07B7.12, Y69E1A.4, F49E11.7, F23B12.1, R03D7.8, F20D6.6, F52H3.6, Y40H4A.2, C23G10.1, F58G1.3, ZC477.10, Y54G2A.24, F42G8.8, ZK938.1, W03D8.2, C47A4.3, C34D4.2, F25B3.4, T25B9.2, F26B1.5, R13A5.11	1453	49	13633	5.93597	9.75976e-15	9.75976e-16	1.80426e-14
SMART	SM00156:PP2Ac	31	1.26324	5.24729e-16	C27B7.6, Y71G12B.30, F40E3.5, T16G12.7, R08C7.8, ZC477.2, GSP-3, GSP-4, C06A1.3, R08A2.2, F07B7.12, Y69E1A.4, F49E11.7, F23B12.1, R03D7.8, F20D6.6, F52H3.6, Y40H4A.2, C23G10.1, F58G1.3, ZC477.10, Y54G2A.24, F42G8.8, ZK938.1, W03D8.2, C47A4.3, C34D4.2, F25B3.4, T25B9.2, F26B1.5, R13A5.11	684	49	5537	5.12135	9.82547e-14	3.27516e-14	6.77236e-13
INTERPRO	IPR000387:Protein-tyrosine phosphatase	30	1.22249	1.08225e-14	Y71G12B.31, R06B10.1, IDA-1, M05B5.1, Y22D7AR.12, M04G7.2, C33H5.16, ZK484.7, W03F11.4, C46A5.1, Y54F10BM.3, F35C11.2, Y69A2AR.19, B0207.1, ZK809.1, Y57G11C.6, ZK354.8, Y48G1C.5, C24D10.1, C33F10.8, R155.3, F47B3.7, F55F8.7, F20H11.4, C17H12.3, C17H12.5, K07F5.6, T27A3.5, PPH-2, F36H12.10	1453	55	13633	5.11781	8.99225e-12	8.17457e-13	1.662e-11
INTERPRO	IPR000980:SH2 motif	33	1.34474	1.77668e-14	R11E3.1, C35E7.10, KIN-26, C18H7.4, Y4C6A.1, F01D4.3, C25A8.5, Y69E1A.3, Y52D5A.2, C55C3.4, F26E4.5, Y116A8C.38, KIN-5, B0207.11, T08G11.2, FRK-1, K09B11.5, T06C10.3, W01B6.5, ZC581.7, F57B9.8, T25B9.4, T25B9.5, ZK622.1, C34F11.5, SPE-8, KIN-21, KIN-24, F59A3.8, F22B3.8, Y116A8C.24, T21G5.1, Y43C5B.2	1453	67	13633	4.62131	1.48326e-11	1.23601e-12	2.74225e-11
PIR_SUPERFAMILY	PIRSF038285:cuticle collagen	35	1.42624	3.0994e-14	COL-58, DPY-4, DPY-5, COL-180, COL-97, COL-175, DPY-13, COL-79, COL-111, COL-77, COL-92, COL-91, COL-7, COL-133, COL-90, COL-73, COL-48, COL-13, COL-49, COL-12, COL-34, BLI-2, COL-150, COL-145, SQT-1, COL-60, COL-129, LON-3, COL-104, COL-88, COL-65, COL-61, COL-14, COL-45, COL-125	518	73	4541	4.20307	9.85012e-12	9.85012e-12	4.17555e-11
GOTERM_MF_FAT	GO:0004713~protein tyrosine kinase activity	87	3.54523	4.8498e-13	K06H7.8, C35E7.10, CKK-1, Y69F12A.1, C18H7.4, ZK666.8, TAG-191, CDK-4, T05C12.1, F01D4.3, C25A8.5, VER-1, C14A4.13, W06F12.3, C27D8.1, F54H5.2, W02B12.12, TAG-344, F26E4.5, ZK596.2, W03A5.1, Y116A8C.38, FRK-1, F38E1.3, GSKA-3, K09B11.5, W01B6.2, Y39G8C.2, F35C11.3, W01B6.5, Y39G8B.5, ZC581.7, F57B9.8, OLD-1, M05D6.1, R13H9.5, TPA-1, C34F11.5, GCY-11, CMK-1, Y48G1BM.6, KIN-21, F59A3.8, Y38H8A.4, K…	753	351	6686	2.20081	1.70701e-10	2.13376e-11	6.63813e-10
SMART	SM00252:SH2	33	1.34474	8.12798e-13	R11E3.1, C35E7.10, KIN-26, C18H7.4, Y4C6A.1, F01D4.3, C25A8.5, Y69E1A.3, Y52D5A.2, C55C3.4, F26E4.5, Y116A8C.38, KIN-5, B0207.11, T08G11.2, FRK-1, K09B11.5, T06C10.3, W01B6.5, ZC581.7, F57B9.8, T25B9.4, T25B9.5, ZK622.1, C34F11.5, SPE-8, KIN-21, KIN-24, F59A3.8, F22B3.8, Y116A8C.24, T21G5.1, Y43C5B.2	684	67	5537	3.9871	1.43865e-10	3.59661e-11	9.98346e-10
INTERPRO	IPR008266:Tyrosine protein kinase, active site	34	1.38549	1.85342e-12	R11E3.1, C35E7.10, KIN-26, C18H7.4, Y4C6A.1, F01D4.3, C25A8.5, Y69E1A.3, Y52D5A.2, C55C3.4, F20D6.5, F26E4.5, KIN-30, W03A5.1, Y116A8C.38, KIN-5, FRK-1, K09B11.5, T06C10.3, ZC581.7, F57B9.8, OLD-1, T25B9.4, T25B9.5, ZK622.1, C34F11.5, SPE-8, KIN-21, Y48G1BM.6, KIN-24, F59A3.8, F22B3.8, Y116A8C.24, T21G5.1	1453	81	13633	3.9384	1.54759e-09	1.19046e-10	2.86099e-09
SP_PIR_KEYWORDS	tyrosine-protein kinase	34	1.38549	1.92703e-12	R11E3.1, C35E7.10, KIN-26, C18H7.4, Y4C6A.1, F01D4.3, Y69E1A.3, C25A8.5, VER-1, Y52D5A.2, C55C3.4, F26E4.5, W03A5.1, Y116A8C.38, KIN-5, FRK-1, K09B11.5, T06C10.3, W01B6.5, ZC581.7, F57B9.8, OLD-1, T25B9.4, T25B9.5, ZK622.1, C34F11.5, SPE-8, KIN-21, KIN-24, F59A3.8, F22B3.8, Y116A8C.24, T21G5.1, Y43C5B.2	2377	73	19674	3.85496	4.04673e-10	4.04673e-10	2.4346e-09
INTERPRO	IPR004843:Metallophosphoesterase	30	1.22249	2.62542e-12	C27B7.6, Y71G12B.30, T16G12.7, R08C7.8, ZC477.2, GSP-3, GSP-4, C06A1.3, R08A2.2, Y69E1A.4, F49E11.7, F23B12.1, F20D6.6, F52H3.6, Y40H4A.2, C23G10.1, F58G1.3, Y54G2A.24, F42G8.8, ZK938.1, W03D8.2, C47A4.3, H25K10.1, K07C11.7, C34D4.2, F25B3.4, T25B9.2, Y105C5B.15, F26B1.5, R13A5.11	1453	65	13633	4.33046	2.19226e-09	1.5659e-10	4.05275e-09
UP_SEQ_FEATURE	domain:MSP	14	0.570497	1.41431e-11	F38H4.6, MSP-56, MSP-57, MSP-31, ZK1307.4, MSP-59, MSP-33, MSP-53, MSP-19, MSP-36, MSP-55, MSP-38, MSP-113, F58A6.9, MSP-10, MSP-64, MSP-63, MSP-3, MSP-65, SSP-31, SSP-11, SSP-10, MSP-40, MSP-152, SSP-19, MSP-45, SSP-16, MSP-81, MSP-49, MSP-79, MSP-78, MSP-77, ZK688.12, MSP-76, MSP-51, MSP-50, MSP-142, ZK1307.3	250	18	3249	10.108	9.75876e-09	9.75876e-09	2.12876e-08
INTERPRO	IPR001245:Tyrosine protein kinase	39	1.58924	7.33153e-11	R11E3.1, C35E7.10, KIN-26, C18H7.4, Y4C6A.1, F01D4.3, Y69E1A.3, C25A8.5, VER-1, Y52D5A.2, C14A4.13, C55C3.4, F26E4.5, KIN-30, W03A5.1, Y116A8C.38, ODR-1, KIN-5, FRK-1, C39H7.1, K09B11.5, T06C10.3, W01B6.5, ZC581.7, F57B9.8, OLD-1, T25B9.4, T25B9.5, ZK622.1, C34F11.5, SPE-8, KIN-21, KIN-24, F59A3.8, Y38H8A.3, F22B3.8, Y116A8C.24, T21G5.1, Y43C5B.2	1453	115	13633	3.18194	6.12183e-08	4.08122e-09	1.13172e-07
PIR_SUPERFAMILY	PIRSF000908:serine/threonine-protein phosphatase, conventional type	19	0.774246	8.14281e-11	C23G10.1, Y71G12B.30, F58G1.3, Y54G2A.24, F40E3.5, T16G12.7, F42G8.8, ZK938.1, GSP-4, C06A1.3, Y69E1A.4, F49E11.7, C34D4.2, F23B12.1, T25B9.2, F52H3.6, F26B1.5, Y40H4A.2, R13A5.11	518	29	4541	5.74351	2.58941e-08	1.29471e-08	1.09779e-07
GOTERM_MF_3	GO:0001883~purine nucleoside binding	154	6.27547	1.06622e-10	K06H7.8, VY10G11R.1, CKK-1, F23F1.5, C18H7.4, ZK666.8, F26A1.3, TAG-191, CDK-4, R10D12.10, H12I13.1, F01D4.3, W09C3.1, C03C10.2, C14A4.13, W06F12.3, C27D8.1, ABT-5, F54H5.2, ABT-1, F26E4.5, FBXB-54, ZK596.2, W03A5.1, C09B9.4, ZC581.7, F57B9.8, OLD-1, R13H9.6, TPA-1, R13H9.5, M7.7, ZC581.2, F26A1.4, KIN-21, KIN-24, F22B3.8, C27D6.11, T19D12.5, B0207.7, C56C10.6, ZC373.3, Y47G6A.13, ACDH-5, Y69E1A.…	679	1010	7243	1.62648	8.20985e-09	2.73662e-09	1.12492e-07
INTERPRO	IPR016130:Protein-tyrosine phosphatase, active site	26	1.05949	1.33722e-10	Y71G12B.31, ZK354.8, F36H1.3, C15H7.3, T20B6.1, F54F12.1, Y22D7AR.12, M04G7.2, Y113G7C.1, C33H5.16, ZK484.7, H06I04.5, R155.3, W03F11.4, K09F6.3, F26A3.4, F47B3.7, T28F4.3, F55F8.7, F20H11.4, C17H12.3, T22C1.8, T27A3.5, F25H5.7, B0207.1, F36H12.10	1453	57	13633	4.27981	1.11658e-07	6.97864e-09	2.06419e-07
GOTERM_MF_2	GO:0016740~transferase activity	190	7.74246	6.21294e-10	K06H7.8, VY10G11R.1, CKK-1, C18H7.4, ZK666.8, F26A1.3, TAG-191, CDK-4, R10D12.10, H12I13.1, F01D4.3, C03C10.2, W09C3.1, C14A4.13, W06F12.3, UGT-64, C27D8.1, F54H5.2, Y53G8B.2, F26E4.5, ZK596.2, W03A5.1, K02E11.6, F43G6.5, K06B9.2, C09B9.4, ZC581.7, F57B9.8, OLD-1, R13H9.6, TPA-1, R13H9.5, M7.7, ZC581.2, D1044.1, F26A1.4, KIN-21, KIN-24, F22B3.8, T28F2.1, C27D6.11, UGT-8, GST-41, T19D12.5, B0207.7…	894	1249	8884	1.51169	2.7337e-08	1.36685e-08	5.81267e-07
GOTERM_BP_2	GO:0043170~macromolecule metabolic process	303	12.3472	6.93768e-10	VY10G11R.1, CKK-1, Y71H2AM.25, TAG-191, R10D12.10, ZK484.7, H12I13.1, EAK-6, SKR-10, NHR-7, Y19D10B.6, C14A4.13, C27D8.1, F54H5.2, SKR-15, SKR-12, T22C1.8, SKR-13, FBXB-54, W03A5.1, NHR-145, WRT-4, WRT-6, C09B9.4, C07E3.4, CYN-10, R03G8.4, F57B9.8, F42C5.5, F55H12.5, OLD-1, NAS-38, M7.7, NAS-32, T28A11.20, KIN-21, KIN-24, NAS-30, NAS-31, K02F6.1, ZMP-1, C27D6.11, F55D12.6, DAF-8, T19D12.5, Y18H1A…	777	2372	8116	1.33429	8.32522e-08	8.32522e-08	7.96399e-07
SP_PIR_KEYWORDS	cytoskeleton	42	1.71149	9.18732e-10	F38H4.6, MSP-31, Y48B6A.5, MSP-33, F13H8.12, Y53C10A.15, MSP-36, MSP-38, Y38F2AR.10, MSP-113, C54E10.1, C15H11.1, ARX-7, F54H5.3, MSP-3, C10H11.7, C35E7.9, MSP-40, F13A7.1, MSP-152, T22B3.3, W03D8.5, Y53F4B.19, SPE-26, F21H7.5, MSP-142, F42A9.7, C14A4.8, F57A10.2, MSP-56, MSP-57, MSP-59, F36D3.4, MSP-53, MSP-19, MSP-55, DCT-9, F58A6.9, MSP-10, ZK546.3, F36H12.3, MSP-64, MSP-63, MSP-65, F52F12.8, …	2377	125	19674	2.78101	1.92934e-07	9.64669e-08	1.16073e-06
INTERPRO	IPR017442:Serine/threonine protein kinase-related	62	2.52649	3.77818e-09	K06H7.8, D2024.1, CKK-1, Y69F12A.1, C05C12.1, F26A1.3, ZK666.8, TAG-191, CDK-4, T05C12.1, C03C10.2, W09C3.1, W06F12.3, C27D8.1, F54H5.2, W02B12.12, TAG-344, B0218.5, ZK596.2, F38E1.3, W03G9.5, GSKA-3, W01B6.2, Y39G8C.2, F35C11.3, Y39G8B.5, M05D6.1, R13H9.6, R13H9.5, TPA-1, M7.7, CMK-1, GCY-11, F53C3.1, Y38H8A.4, GCY-19, C27D6.11, T19D12.5, B0207.7, C56C10.6, ZC373.3, Y47G6A.13, C08F8.6, D2045.5, …	1453	265	13633	2.19519	3.15478e-06	1.85575e-07	5.83214e-06
SMART	SM00219:TyrKc	39	1.58924	3.78791e-09	R11E3.1, C35E7.10, KIN-26, C18H7.4, Y4C6A.1, F01D4.3, Y69E1A.3, C25A8.5, VER-1, Y52D5A.2, C14A4.13, C55C3.4, F26E4.5, KIN-30, W03A5.1, Y116A8C.38, ODR-1, KIN-5, FRK-1, C39H7.1, K09B11.5, T06C10.3, W01B6.5, ZC581.7, F57B9.8, OLD-1, T25B9.4, T25B9.5, ZK622.1, C34F11.5, SPE-8, KIN-21, KIN-24, F59A3.8, Y38H8A.3, F22B3.8, Y116A8C.24, T21G5.1, Y43C5B.2	684	115	5537	2.74527	6.70459e-07	1.34092e-07	4.65265e-06
GOTERM_MF_1	GO:0003824~catalytic activity	479	19.5192	9.16857e-09	VY10G11R.1, CKK-1, Y108F1.5, TAG-191, H12I13.1, C31H1.5, Y19D10B.6, C14A4.13, Y51A2B.4, C27D8.1, ABT-5, E04F6.4, UGT-64, F54H5.2, SKR-15, T22C1.8, ABT-1, W03A5.1, K06B9.2, C09B9.4, CYN-10, F42C5.5, F57B9.8, NAS-38, M7.7, NAS-32, PAF-1, KIN-21, KIN-24, NAS-30, NAS-31, Y105C5B.15, C27D6.11, ACE-3, DAF-9, Y18H1A.9, IDA-1, B0207.7, T16G12.7, F40G9.9, ACDH-5, T19D2.1, NAS-25, C33H5.16, GSP-3, R09E10.9…	1012	3726	9555	1.21379	8.25172e-08	4.12586e-08	5.27652e-06
INTERPRO	IPR005514:Protein of unknown function DUF316	14	0.570497	1.92938e-08	D1081.3, R01H2.2, T06G6.8, F15H9.1, F35E2.9, Y71F9B.15, C46E10.1, Y47H9B.2, F35E2.5, F25E5.7, Y116A8A.4, TRY-8, TRY-7, Y116A8A.6	1453	21	13633	6.2551	1.61102e-05	8.95016e-07	2.97826e-05
GOTERM_MF_3	GO:0032553~ribonucleotide binding	158	6.43847	1.98084e-08	K06H7.8, VY10G11R.1, CKK-1, F23F1.5, C18H7.4, ZK666.8, F26A1.3, TAG-191, CDK-4, R10D12.10, H12I13.1, F01D4.3, W09C3.1, C03C10.2, C14A4.13, W06F12.3, C27D8.1, ABT-5, F54H5.2, ABT-1, F26E4.5, FBXB-54, ZK596.2, W03A5.1, C09B9.4, ZC581.7, F57B9.8, OLD-1, R13H9.6, TPA-1, R13H9.5, M7.7, ZC581.2, W04C9.5, F26A1.4, KIN-21, KIN-24, F22B3.8, C27D6.11, T19D12.5, B0207.7, C56C10.6, ZC373.3, Y47G6A.13, Y69E1A…	679	1120	7243	1.50483	1.52525e-06	3.81312e-07	2.08991e-05
GOTERM_MF_2	GO:0016787~hydrolase activity	213	8.67971	2.99389e-08	Y71H2AM.25, Y108F1.5, ZK484.7, H12I13.1, C31H1.5, EAK-6, Y19D10B.6, C29F5.3, Y51A2B.4, ABT-5, T22C1.8, ABT-1, WRT-4, WRT-6, SUL-2, C07E3.4, R03G8.4, F42C5.5, F55H12.5, NAS-38, NAS-32, PAF-1, T28A11.20, NAS-30, NAS-31, ZK262.3, Y105C5B.15, K02F6.1, ZMP-1, F26B1.5, ACE-3, Y18H1A.9, IDA-1, T16G12.7, R08C7.8, F40G9.9, C08F11.7, NAS-25, T19D2.1, R09E10.9, C33H5.16, GSP-3, GSP-4, F07B7.12, K09F6.3, C46…	894	1508	8884	1.40362	1.31731e-06	4.39104e-07	2.80101e-05
GOTERM_BP_3	GO:0044260~cellular macromolecule metabolic process	251	10.2282	3.36099e-08	VY10G11R.1, CKK-1, TAG-191, R10D12.10, ZK484.7, H12I13.1, EAK-6, SKR-10, NHR-7, C14A4.13, C27D8.1, F54H5.2, SKR-15, SKR-12, T22C1.8, SKR-13, FBXB-54, W03A5.1, NHR-145, C09B9.4, C07E3.4, CYN-10, F57B9.8, F42C5.5, F55H12.5, OLD-1, M7.7, KIN-21, KIN-24, C27D6.11, F55D12.6, DAF-8, T19D12.5, IDA-1, NHR-116, B0207.7, C56C10.6, R09E10.9, C33H5.16, K09F6.3, C46A5.1, T04F3.3, Y54F10BM.3, NHR-95, T15H9.6, …	752	1969	7908	1.34053	1.05534e-05	3.51783e-06	4.52252e-05
GOTERM_MF_4	GO:0030554~adenyl nucleotide binding	154	6.27547	3.80974e-08	K06H7.8, VY10G11R.1, CKK-1, F23F1.5, C18H7.4, ZK666.8, F26A1.3, TAG-191, CDK-4, R10D12.10, H12I13.1, F01D4.3, W09C3.1, C03C10.2, C14A4.13, W06F12.3, C27D8.1, ABT-5, F54H5.2, ABT-1, F26E4.5, FBXB-54, ZK596.2, W03A5.1, C09B9.4, ZC581.7, F57B9.8, OLD-1, R13H9.6, TPA-1, R13H9.5, M7.7, ZC581.2, F26A1.4, KIN-21, KIN-24, F22B3.8, C27D6.11, T19D12.5, B0207.7, C56C10.6, ZC373.3, Y47G6A.13, ACDH-5, Y69E1A.…	627	1009	6132	1.49267	3.88593e-06	9.71483e-07	4.24433e-05
GOTERM_MF_2	GO:0001882~nucleoside binding	154	6.27547	6.01122e-08	K06H7.8, VY10G11R.1, CKK-1, F23F1.5, C18H7.4, ZK666.8, F26A1.3, TAG-191, CDK-4, R10D12.10, H12I13.1, F01D4.3, W09C3.1, C03C10.2, C14A4.13, W06F12.3, C27D8.1, ABT-5, F54H5.2, ABT-1, F26E4.5, FBXB-54, ZK596.2, W03A5.1, C09B9.4, ZC581.7, F57B9.8, OLD-1, R13H9.6, TPA-1, R13H9.5, M7.7, ZC581.2, F26A1.4, KIN-21, KIN-24, F22B3.8, C27D6.11, T19D12.5, B0207.7, C56C10.6, ZC373.3, Y47G6A.13, ACDH-5, Y69E1A.…	894	1017	8884	1.50477	2.64493e-06	6.61234e-07	5.62395e-05
INTERPRO	IPR009658:Protein of unknown function DUF1248	10	0.407498	7.76478e-08	F22B5.5, F10G2.7, C28D4.7, ZK1248.5, C28D4.8, C28D4.5, C28D4.4, F36D3.8, K08A2.2, T09F5.10	1453	11	13633	8.52969	6.48338e-05	3.41241e-06	0.00011986
GOTERM_MF_3	GO:0017076~purine nucleotide binding	162	6.60147	1.2774e-07	K06H7.8, VY10G11R.1, CKK-1, F23F1.5, C18H7.4, ZK666.8, F26A1.3, TAG-191, CDK-4, R10D12.10, H12I13.1, F01D4.3, W09C3.1, C03C10.2, C14A4.13, W06F12.3, C27D8.1, ABT-5, F54H5.2, ABT-1, F26E4.5, FBXB-54, ZK596.2, W03A5.1, C09B9.4, ZC581.7, F57B9.8, OLD-1, R13H9.6, TPA-1, R13H9.5, M7.7, ZC581.2, W04C9.5, F26A1.4, KIN-21, KIN-24, F22B3.8, C27D6.11, T19D12.5, B0207.7, C56C10.6, ZC373.3, Y47G6A.13, ACDH-5…	679	1187	7243	1.45584	9.83591e-06	1.96719e-06	0.000134773
GOTERM_MF_5	GO:0032559~adenyl ribonucleotide binding	150	6.11247	1.68655e-07	K06H7.8, VY10G11R.1, CKK-1, F23F1.5, C18H7.4, ZK666.8, F26A1.3, TAG-191, CDK-4, R10D12.10, H12I13.1, F01D4.3, W09C3.1, C03C10.2, C14A4.13, W06F12.3, C27D8.1, ABT-5, F54H5.2, ABT-1, F26E4.5, FBXB-54, ZK596.2, W03A5.1, C09B9.4, ZC581.7, F57B9.8, OLD-1, R13H9.6, TPA-1, R13H9.5, M7.7, ZC581.2, F26A1.4, KIN-21, KIN-24, F22B3.8, C27D6.11, T19D12.5, B0207.7, C56C10.6, ZC373.3, Y47G6A.13, Y69E1A.3, H05L1…	540	944	4951	1.45686	1.82145e-05	6.07155e-06	0.000189905
SP_PIR_KEYWORDS	collagen	32	1.30399	1.93887e-07	COL-58, DPY-5, COL-139, COL-175, COL-71, DPY-13, COL-173, COL-79, COL-111, COL-110, COL-91, COL-7, COL-90, COL-73, COL-48, COL-13, COL-49, COL-12, COL-33, COL-34, BLI-1, COL-172, COL-145, COL-109, SQT-1, LON-3, COL-104, COL-88, COL-141, COL-14, COL-45, COL-17	2377	97	19674	2.7305	4.07155e-05	1.3572e-05	0.000244958
UP_SEQ_FEATURE	region of interest:Triple-helical region	14	0.570497	3.30948e-07	COL-13, COL-12, COL-34, DPY-5, BLI-1, COL-145, SQT-1, DPY-13, LON-3, COL-79, COL-14, COL-91, COL-7, COL-90	250	33	3249	5.51345	0.000228328	0.00011417	0.000498127
INTERPRO	IPR012885:F-box associated type 2	42	1.71149	4.2821e-07	FBXB-107, SDZ-10, FBXB-106, K05F6.4, W08F4.10, SDZ-33, FBXB-17, FBXB-13, Y53F4B.24, FBXB-15, FBXB-98, FBXB-97, F49B2.7, FBXB-59, F21D9.1, FBXB-95, FBXB-93, T26H2.10, FBXB-72, FBXB-54, FBXB-53, FBXB-103, F55C9.14, FBXB-119, FBXB-21, SDZ-9, Y6G8.9, MATH-48, FBXB-26, T02H6.5, FBXB-85, FBXB-69, FBXB-46, FBXB-45, FBXB-7, FBXB-8, FBXB-60, FBXB-41, T05D4.2, FBXB-111, FBXB-44, FBXB-63	1453	171	13633	2.30451	0.000357492	1.78776e-05	0.000661
INTERPRO	IPR001810:Cyclin-like F-box	78	3.17848	5.94057e-07	R03H10.1, SDZ-33, FBXB-17, FBXB-13, F34D6.1, FBXB-15, FBXB-98, FBXA-223, FBXA-170, F35E2.8, FBXB-59, Y20C6A.1, FBXB-95, FBXA-224, FBXB-93, FBXB-56, FBXB-54, Y6E2A.10, T26E3.5, SDZ-9, FBXA-94, FBXA-2, FBXB-85, FBXA-162, FBXA-163, FBXB-46, FBXB-45, FBXB-7, FBXB-8, FBXB-41, FBXA-120, FBXB-44, K10G4.10, Y40B10A.4, SDZ-10, FBXB-106, W08F4.12, K05F6.4, FBXA-111, T08E11.1, FBXA-113, FBXA-114, FBXA-83, F…	1453	413	13633	1.77203	0.000495915	2.36206e-05	0.000917005
INTERPRO	IPR004296:Protein of unknown function DUF236	10	0.407498	8.26589e-07	C47E12.10, C04F12.6, C03C11.1, F27C1.3, MATH-46, ZC376.8, F47B3.4, C36F7.5, K07A1.5, R08A2.1	1453	13	13633	7.21743	0.000689964	3.13723e-05	0.00127595
GOTERM_BP_2	GO:0044238~primary metabolic process	356	14.5069	8.63124e-07	VY10G11R.1, CKK-1, LYS-2, Y71H2AM.25, TAG-191, R10D12.10, ZK484.7, H12I13.1, C31H1.5, EAK-6, SKR-10, Y19D10B.6, NHR-7, C14A4.13, Y51A2B.4, C27D8.1, F54H5.2, SKR-15, SKR-12, T22C1.8, SKR-13, HDL-1, FBXB-54, W03A5.1, NHR-145, WRT-4, WRT-6, C09B9.4, C07E3.4, R03G8.4, CYN-10, F42C5.5, F57B9.8, F55H12.5, OLD-1, NAS-38, M7.7, NAS-32, PAF-1, T28A11.20, KIN-21, KIN-24, NAS-30, NAS-31, ZK262.3, LYS-10, K0…	777	3059	8116	1.2156	0.00010357	5.17861e-05	0.000990804
GOTERM_CC_5	GO:0005856~cytoskeleton	50	2.03749	1.49071e-06	F38H4.6, MSP-31, Y48B6A.5, MSP-33, Y53C10A.15, MSP-36, MSP-38, Y38F2AR.10, MSP-113, C54E10.1, C15H11.1, ARX-7, SPE-15, F54H5.3, MSP-3, C10H11.7, C35E7.9, C56G7.3, MSP-40, F13A7.1, MSP-152, IFP-1, T22B3.3, W03D8.5, Y53F4B.19, Y113G7C.1, TMD-2, DLC-6, SPE-26, FRM-8, F21H7.5, MSP-142, F42A9.7, BBS-5, F57A10.2, MSP-56, MSP-57, MSP-59, F36D3.4, MSP-53, MSP-19, MSP-55, F58A6.9, MSP-10, ZK546.3, F36H12.…	922	235	8803	2.03143	0.000165455	5.51547e-05	0.00168703
GOTERM_CC_4	GO:0005856~cytoskeleton	50	2.03749	1.50562e-06	F38H4.6, MSP-31, Y48B6A.5, MSP-33, Y53C10A.15, MSP-36, MSP-38, Y38F2AR.10, MSP-113, C54E10.1, C15H11.1, ARX-7, SPE-15, F54H5.3, MSP-3, C10H11.7, C35E7.9, C56G7.3, MSP-40, F13A7.1, MSP-152, IFP-1, T22B3.3, W03D8.5, Y53F4B.19, Y113G7C.1, TMD-2, DLC-6, SPE-26, FRM-8, F21H7.5, MSP-142, F42A9.7, BBS-5, F57A10.2, MSP-56, MSP-57, MSP-59, F36D3.4, MSP-53, MSP-19, MSP-55, F58A6.9, MSP-10, ZK546.3, F36H12.…	925	235	8829	2.03082	0.000165604	4.14037e-05	0.00170107
GOTERM_MF_FAT	GO:0005524~ATP binding	150	6.11247	2.67536e-06	K06H7.8, VY10G11R.1, CKK-1, F23F1.5, C18H7.4, ZK666.8, F26A1.3, TAG-191, CDK-4, R10D12.10, H12I13.1, F01D4.3, W09C3.1, C03C10.2, C14A4.13, W06F12.3, C27D8.1, ABT-5, F54H5.2, ABT-1, F26E4.5, FBXB-54, ZK596.2, W03A5.1, C09B9.4, ZC581.7, F57B9.8, OLD-1, R13H9.6, TPA-1, R13H9.5, M7.7, ZC581.2, F26A1.4, KIN-21, KIN-24, F22B3.8, C27D6.11, T19D12.5, B0207.7, C56C10.6, ZC373.3, Y47G6A.13, Y69E1A.3, H05L1…	753	942	6686	1.41388	0.000941286	0.000104631	0.00366208
GOTERM_MF_FAT	GO:0032559~adenyl ribonucleotide binding	150	6.11247	3.06842e-06	K06H7.8, VY10G11R.1, CKK-1, F23F1.5, C18H7.4, ZK666.8, F26A1.3, TAG-191, CDK-4, R10D12.10, H12I13.1, F01D4.3, W09C3.1, C03C10.2, C14A4.13, W06F12.3, C27D8.1, ABT-5, F54H5.2, ABT-1, F26E4.5, FBXB-54, ZK596.2, W03A5.1, C09B9.4, ZC581.7, F57B9.8, OLD-1, R13H9.6, TPA-1, R13H9.5, M7.7, ZC581.2, F26A1.4, KIN-21, KIN-24, F22B3.8, C27D6.11, T19D12.5, B0207.7, C56C10.6, ZC373.3, Y47G6A.13, Y69E1A.3, H05L1…	753	944	6686	1.41088	0.0010795	0.000108003	0.00420009
PIR_SUPERFAMILY	PIRSF000675:tyrosine-protein kinase	11	0.448248	3.11317e-06	R11E3.1, C35E7.10, C55C3.4, ZK622.1, SPE-8, F59A3.8, ZC581.7, F26E4.5, F22B3.8, KIN-5, C25A8.5	518	17	4541	5.67238	0.0009895	0.000329942	0.004197
GOTERM_MF_4	GO:0032555~purine ribonucleotide binding	158	6.43847	4.38063e-06	K06H7.8, VY10G11R.1, CKK-1, F23F1.5, C18H7.4, ZK666.8, F26A1.3, TAG-191, CDK-4, R10D12.10, H12I13.1, F01D4.3, W09C3.1, C03C10.2, C14A4.13, W06F12.3, C27D8.1, ABT-5, F54H5.2, ABT-1, F26E4.5, FBXB-54, ZK596.2, W03A5.1, C09B9.4, ZC581.7, F57B9.8, OLD-1, R13H9.6, TPA-1, R13H9.5, M7.7, ZC581.2, W04C9.5, F26A1.4, KIN-21, KIN-24, F22B3.8, C27D6.11, T19D12.5, B0207.7, C56C10.6, ZC373.3, Y47G6A.13, Y69E1A…	627	1120	6132	1.37967	0.000446725	8.9361e-05	0.00488023
INTERPRO	IPR008574:Protein of unknown function DUF856, Caenorhabditis species	7	0.285249	9.20282e-06	T16A9.5, F58A6.5, Y37D8A.5, W03D8.9, K06A5.2, Y69E1A.1, W03D8.10	1453	7	13633	9.38266	0.00765494	0.000334048	0.0142049
INTERPRO	IPR002900:Protein of unknown function DUF38, Caenorhabditis species	47	1.91524	1.24307e-05	Y40B10A.4, FBXA-111, T08E11.1, FBXA-113, FBXA-114, FBXA-83, FBXA-115, FBXA-223, FBXA-192, FBXA-155, FBXA-42, FBXA-43, FBXA-202, FBXA-136, FBXA-135, FBXA-170, T08E11.8, FBXA-196, Y20C6A.1, FBXA-197, FBXA-134, FBXA-224, FBXA-158, FBXA-153, F47H4.2, FBXA-44, R05C11.2, FBXA-78, K10G4.5, FBXA-94, FBXA-2, FBXA-218, FBXA-104, FBXA-71, FBXA-162, FBXA-125, FBXA-143, FBXA-108, FBXA-163, FBXA-30, FBXA-185, …	1453	227	13633	1.94266	0.0103261	0.000432395	0.0191868
PIR_SUPERFAMILY	PIRSF016383:DUF856_CAE_spp	7	0.285249	1.34218e-05	T16A9.5, F58A6.5, Y37D8A.5, W03D8.9, K06A5.2, Y69E1A.1, W03D8.10	518	7	4541	8.76641	0.00425907	0.00106647	0.0180934
GOTERM_MF_FAT	GO:0030554~adenyl nucleotide binding	154	6.27547	2.27711e-05	K06H7.8, VY10G11R.1, CKK-1, F23F1.5, C18H7.4, ZK666.8, F26A1.3, TAG-191, CDK-4, R10D12.10, H12I13.1, F01D4.3, W09C3.1, C03C10.2, C14A4.13, W06F12.3, C27D8.1, ABT-5, F54H5.2, ABT-1, F26E4.5, FBXB-54, ZK596.2, W03A5.1, C09B9.4, ZC581.7, F57B9.8, OLD-1, R13H9.6, TPA-1, R13H9.5, M7.7, ZC581.2, F26A1.4, KIN-21, KIN-24, F22B3.8, C27D6.11, T19D12.5, B0207.7, C56C10.6, ZC373.3, Y47G6A.13, ACDH-5, Y69E1A.…	753	1009	6686	1.35519	0.00798349	0.000728419	0.0311655
GOTERM_MF_FAT	GO:0001883~purine nucleoside binding	154	6.27547	2.35297e-05	K06H7.8, VY10G11R.1, CKK-1, F23F1.5, C18H7.4, ZK666.8, F26A1.3, TAG-191, CDK-4, R10D12.10, H12I13.1, F01D4.3, W09C3.1, C03C10.2, C14A4.13, W06F12.3, C27D8.1, ABT-5, F54H5.2, ABT-1, F26E4.5, FBXB-54, ZK596.2, W03A5.1, C09B9.4, ZC581.7, F57B9.8, OLD-1, R13H9.6, TPA-1, R13H9.5, M7.7, ZC581.2, F26A1.4, KIN-21, KIN-24, F22B3.8, C27D6.11, T19D12.5, B0207.7, C56C10.6, ZC373.3, Y47G6A.13, ACDH-5, Y69E1A.…	753	1010	6686	1.35385	0.00824834	0.000689974	0.0322035
GOTERM_CC_FAT	GO:0005856~cytoskeleton	50	2.03749	2.42617e-05	F38H4.6, MSP-31, Y48B6A.5, MSP-33, Y53C10A.15, MSP-36, MSP-38, Y38F2AR.10, MSP-113, C54E10.1, C15H11.1, ARX-7, SPE-15, F54H5.3, MSP-3, C10H11.7, C35E7.9, C56G7.3, MSP-40, F13A7.1, MSP-152, IFP-1, T22B3.3, W03D8.5, Y53F4B.19, Y113G7C.1, TMD-2, DLC-6, SPE-26, FRM-8, F21H7.5, MSP-142, F42A9.7, BBS-5, F57A10.2, MSP-56, MSP-57, MSP-59, F36D3.4, MSP-53, MSP-19, MSP-55, F58A6.9, MSP-10, ZK546.3, F36H12.…	917	235	7912	1.83577	0.00346345	0.00346345	0.028729
SP_PIR_KEYWORDS	serine/threonine-specific phosphatase	12	0.488998	2.6177e-05	F49E11.7, F58G1.3, C34D4.2, F25B3.4, T16G12.7, F42G8.8, ZK938.1, F52H3.6, GSP-4, W03D8.2, Y69E1A.4, Y40H4A.2	2377	23	19674	4.31834	0.00548215	0.00137336	0.0330671
INTERPRO	IPR001357:BRCT	13	0.529747	2.81568e-05	C18H2.3, F26D2.10, C18H2.5, C18H2.4, T08G3.7, F36D3.5, REV-1, K09D9.11, C01G10.1, F56H1.3, F37A4.4, C18H2.1, F40E12.2	1453	30	13633	4.06582	0.023237	0.000940009	0.0434551
INTERPRO	IPR008498:Protein of unknown function DUF780, Caenorhabditis species	7	0.285249	3.34699e-05	NSPD-7, NSPD-6, NSPD-5, NSPD-4, NSPD-9, NSPD-10, NSPD-1, NSPD-2, NSPD-3	1453	8	13633	8.20982	0.0275609	0.00107434	0.0516529
GOTERM_MF_FAT	GO:0001882~nucleoside binding	154	6.27547	3.55384e-05	K06H7.8, VY10G11R.1, CKK-1, F23F1.5, C18H7.4, ZK666.8, F26A1.3, TAG-191, CDK-4, R10D12.10, H12I13.1, F01D4.3, W09C3.1, C03C10.2, C14A4.13, W06F12.3, C27D8.1, ABT-5, F54H5.2, ABT-1, F26E4.5, FBXB-54, ZK596.2, W03A5.1, C09B9.4, ZC581.7, F57B9.8, OLD-1, R13H9.6, TPA-1, R13H9.5, M7.7, ZC581.2, F26A1.4, KIN-21, KIN-24, F22B3.8, C27D6.11, T19D12.5, B0207.7, C56C10.6, ZC373.3, Y47G6A.13, ACDH-5, Y69E1A.…	753	1017	6686	1.34453	0.0124318	0.000961825	0.0486353
SP_PIR_KEYWORDS	phosphoric monoester hydrolase	14	0.570497	4.2003e-05	F58G1.3, T16G12.7, R08C7.8, F42G8.8, ZK938.1, GSP-4, W03D8.2, Y69E1A.4, C47A4.3, F49E11.7, C34D4.2, F25B3.4, F52H3.6, Y40H4A.2	2377	32	19674	3.62111	0.00878203	0.00176261	0.0530539
GOTERM_BP_1	GO:0008152~metabolic process	420	17.1149	5.54893e-05	VY10G11R.1, CKK-1, TAG-191, H12I13.1, C31H1.5, SKR-10, Y19D10B.6, NHR-7, C14A4.13, Y51A2B.4, E04F6.4, UGT-64, C27D8.1, F54H5.2, SKR-15, T22C1.8, SKR-12, SKR-13, W03A5.1, K06B9.2, C09B9.4, CYN-10, F42C5.5, F57B9.8, NAS-38, M7.7, NAS-32, CYC-2.2, PAF-1, KIN-21, KIN-24, NAS-30, NAS-31, C27D6.11, DAF-8, DAF-9, Y18H1A.9, IDA-1, B0207.7, ACDH-5, NAS-25, T19D2.1, C33H5.16, R09E10.9, K09F6.3, UGT-42, UGT…	826	3776	8513	1.14636	0.000998336	0.000998336	0.0408952
SMART	SM00256:FBOX	78	3.17848	8.01556e-05	R03H10.1, SDZ-33, FBXB-17, FBXB-13, F34D6.1, FBXB-15, FBXB-98, FBXA-223, FBXA-170, F35E2.8, FBXB-59, Y20C6A.1, FBXB-95, FBXA-224, FBXB-93, FBXB-56, FBXB-54, Y6E2A.10, T26E3.5, SDZ-9, FBXA-94, FBXA-2, FBXB-85, FBXA-162, FBXA-163, FBXB-46, FBXB-45, FBXB-7, FBXB-8, FBXB-41, FBXA-120, FBXB-44, K10G4.10, Y40B10A.4, SDZ-10, FBXB-106, W08F4.12, K05F6.4, FBXA-111, T08E11.1, FBXA-113, FBXA-114, FBXA-83, F…	684	413	5537	1.52884	0.0140879	0.00236189	0.0984098
UP_SEQ_FEATURE	signal peptide	54	2.20049	9.96758e-05	CDH-4, DIG-1, HIM-4, ACN-1, B0228.1, CPG-8, CPG-7, INS-7, PXN-1, COL-7, INS-5, C03G6.5, INS-6, WRT-4, COL-13, WRT-6, COL-12, ABF-1, LRP-1, C08F11.12, FLP-13, MUA-3, BLI-1, NAS-38, NAS-32, COL-145, K07C11.7, LON-3, SPE-27, NAS-30, NAS-31, TAG-209, ZK262.3, C05G5.5, DES-2, T16H12.9, DAF-7, NAS-25, GLR-2, PAT-2, FLP-3, FLP-1, B0416.2, CAH-5, FOZI-1, Y73F4A.2, Y45F10C.4, NAS-14, SPE-9, HEX-1, SOL-1, …	250	422	3249	1.663	0.0664677	0.0226658	0.149923
INTERPRO	IPR008271:Serine/threonine protein kinase, active site	42	1.71149	0.000108911	K06H7.8, T19D12.5, CKK-1, F26A1.3, ZK666.8, ZC373.3, Y47G6A.13, CDK-4, C08F8.6, D2045.5, C03C10.2, W06F12.3, T15B12.2, F41G3.5, C55C3.8, C04G2.2, W02B12.12, TAG-344, ZK596.2, F21F3.2, C39H7.1, ZK354.6, GSKA-3, T11F8.4, W01B6.2, Y39G8B.5, NEKL-1, TPA-1, R13H9.5, ZC581.2, C50F4.10, F26A1.4, CMK-1, TTN-1, Y38H8A.4, ZK507.3, Y38H8A.3, F49C5.4, F32B6.10, K11C4.1, Y106G6E.1, C27D6.11	1453	212	13633	1.85883	0.0869326	0.00336269	0.167987
SMART	SM00292:BRCT	13	0.529747	0.000117411	C18H2.3, F26D2.10, C18H2.5, C18H2.4, T08G3.7, F36D3.5, REV-1, K09D9.11, C01G10.1, F56H1.3, F37A4.4, C18H2.1, F40E12.2	684	30	5537	3.50785	0.0205684	0.00296458	0.144119
SP_PIR_KEYWORDS	cuticle	14	0.570497	0.000125827	COL-13, COL-12, COL-34, DPY-5, BLI-1, COL-145, SQT-1, DPY-13, LON-3, COL-79, COL-14, COL-91, COL-7, COL-90	2377	35	19674	3.31073	0.0260792	0.00439452	0.158854
GOTERM_BP_5	GO:0030704~vitelline membrane formation	9	0.366748	0.000193723	Y57G11A.2, Y39A3A.3, Y39F10C.1, Y54E2A.9, C08G5.3, Y37E11AL.4, T02H6.9, T02H6.7, R105.1	608	20	6749	4.99515	0.0829585	0.0171714	0.274221
GOTERM_BP_4	GO:0030704~vitelline membrane formation	9	0.366748	0.000261666	Y57G11A.2, Y39A3A.3, Y39F10C.1, Y54E2A.9, C08G5.3, Y37E11AL.4, T02H6.9, T02H6.7, R105.1	722	20	7683	4.78857	0.115041	0.0241465	0.372545
INTERPRO	IPR013069:BTB/POZ	24	0.977995	0.000272869	Y43E12A.3, F55B11.7, BTB-2, F47D12.7, B0496.1, KEL-10, Y108F1.5, BTB-8, BATH-27, BATH-24, BTB-10, R09A1.2, BATH-13, F27C8.5, BTB-11, BTB-12, BTB-13, K08E4.7, R10D12.8, C17H12.12, BATH-2, BATH-4, BATH-46, BATH-5	1453	100	13633	2.25184	0.203778	0.00810544	0.420383
GOTERM_BP_FAT	GO:0030704~vitelline membrane formation	9	0.366748	0.000273029	Y57G11A.2, Y39A3A.3, Y39F10C.1, Y54E2A.9, C08G5.3, Y37E11AL.4, T02H6.9, T02H6.7, R105.1	741	20	7838	4.75992	0.199524	0.036412	0.419299
INTERPRO	IPR016638:Uncharacterised protein family UPF0376	12	0.488998	0.000298002	F35F10.13, C04E12.2, C36C5.15, C04E12.4, T28A11.3, T28A11.19, C17B7.4, T20D4.10, T28A11.16, T20D4.11, T20D4.12, C17B7.3, C03G6.5	1453	32	13633	3.5185	0.220318	0.00854497	0.459019
PIR_SUPERFAMILY	PIRSF019652:major sperm protein	6	0.244499	0.000324167	MSP-56, MSP-31, MSP-57, MSP-45, MSP-33, MSP-59, MSP-53, MSP-36, MSP-19, MSP-55, MSP-38, MSP-81, MSP-113, F58A6.9, MSP-49, MSP-10, ZK546.3, MSP-79, MSP-78, MSP-64, MSP-77, MSP-76, MSP-63, MSP-3, MSP-65, MSP-51, MSP-50, MSP-142, MSP-40, MSP-152	518	7	4541	7.51407	0.0979648	0.0204092	0.436149
SP_PIR_KEYWORDS	iron	42	1.71149	0.000402628	C27B7.6, DAF-9, Y71G12B.30, T16G12.7, CYP-13A7, GSP-3, GSP-4, C06A1.3, R08A2.2, Y69E1A.4, F49E11.7, CYP-33C5, F23B12.1, CYP-33C2, F52H3.6, D2023.1, PXN-1, CYP-14A3, Y40H4A.2, C23G10.1, NTH-1, F58G1.3, Y54G2A.24, CYP-34A4, CYP-13B1, CAT-2, CYP-34A10, CYP-25A2, CYP-25A1, F42G8.8, CYP-34A6, ZK938.1, W03D8.2, C47A4.3, GCY-37, CYC-2.2, C34D4.2, F25B3.4, CYP-33D3, T25B9.2, F26B1.5, R13A5.11	2377	199	19674	1.74687	0.0810916	0.0120086	0.507492
INTERPRO	IPR009676:Protein of unknown function DUF1265	7	0.285249	0.000415627	Y49F6B.8, F40G12.7, C25G4.8, C50E10.2, W03D8.7, C25G4.7, ZK973.8	1453	11	13633	5.97078	0.29328	0.011504	0.639656
GOTERM_MF_2	GO:0008316~structural constituent of vitelline membrane	9	0.366748	0.000422243	Y57G11A.2, Y39A3A.3, Y39F10C.1, Y54E2A.9, C08G5.3, Y37E11AL.4, T02H6.9, T02H6.7, R105.1	894	20	8884	4.47181	0.018411	0.00370962	0.394344
GOTERM_CC_3	GO:0031143~pseudopodium	5	0.203749	0.000479131	MSP-56, MSP-31, MSP-57, MSP-45, MSP-33, MSP-59, MSP-53, MSP-36, MSP-19, MSP-55, MSP-38, MSP-81, MSP-113, F58A6.9, MSP-49, MSP-10, MSP-79, MSP-78, MSP-64, MSP-77, MSP-76, MSP-63, MSP-3, MSP-65, MSP-51, MSP-50, MSP-142, MSP-40, MSP-152	958	5	9458	9.87265	0.0389966	0.00989506	0.511893
GOTERM_BP_FAT	GO:0043062~extracellular structure organization	11	0.448248	0.000496874	Y57G11A.2, Y39A3A.3, Y39F10C.1, Y54E2A.9, C08G5.3, Y37E11AL.4, DYB-1, T02H6.9, T02H6.7, R105.1, SYG-2	741	32	7838	3.63605	0.333058	0.0562223	0.761837
GOTERM_BP_2	GO:0044237~cellular metabolic process	302	12.3064	0.000499748	VY10G11R.1, CKK-1, TAG-191, R10D12.10, ZK484.7, H12I13.1, C31H1.5, EAK-6, SKR-10, NHR-7, C14A4.13, C27D8.1, F54H5.2, SKR-15, SKR-12, T22C1.8, SKR-13, HDL-1, FBXB-54, W03A5.1, NHR-145, C09B9.4, C07E3.4, CYN-10, F57B9.8, F42C5.5, F55H12.5, OLD-1, M7.7, CYC-2.2, KIN-21, KIN-24, C27D6.11, F55D12.6, UGT-8, DAF-8, T19D12.5, IDA-1, NHR-116, B0207.7, C56C10.6, R09E10.9, C33H5.16, K09F6.3, C46A5.1, UGT-41…	777	2709	8116	1.16444	0.0582212	0.0197964	0.572178
PIR_SUPERFAMILY	PIRSF015697:UCP015697	12	0.488998	0.00051413	F35F10.13, C04E12.2, C36C5.15, C04E12.4, T28A11.3, T28A11.19, C17B7.4, T20D4.10, T28A11.16, T20D4.11, T20D4.12, C17B7.3, C03G6.5	518	32	4541	3.2874	0.150863	0.0268878	0.690915
GOTERM_CC_FAT	GO:0016021~integral to membrane	799	32.5591	0.000521879	Y37H2A.14, C06G4.4, T24C4.4, Y37H2A.10, ANT-1.3, F56A11.6, ZK39.10, F32B4.1, F32B4.2, Y69A2AR.31, GTL-2, C38D9.5, CLEC-266, R05C11.4, CDH-10, CDH-12, C09B9.7, W01D2.3, C09B9.2, M03E7.3, Y69A2AR.23, K06B4.4, IDA-1, GLT-3, R105.1, NAS-25, K09F6.3, CAH-5, Y69A2AR.14, Y69A2AR.19, T12G3.4, F54E4.2, Y37A1A.2, NAS-14, F20G2.6, F45E10.2, Y37D8A.5, HAF-1, TRP-2, T10E9.6, W04E12.5, W04E12.4, T10E9.4, Y37D8…	917	6596	7912	1.04516	0.07193	0.0366361	0.616308
GOTERM_CC_4	GO:0031143~pseudopodium	5	0.203749	0.000546592	MSP-56, MSP-31, MSP-57, MSP-45, MSP-33, MSP-59, MSP-53, MSP-36, MSP-19, MSP-55, MSP-38, MSP-81, MSP-113, F58A6.9, MSP-49, MSP-10, MSP-79, MSP-78, MSP-64, MSP-77, MSP-76, MSP-63, MSP-3, MSP-65, MSP-51, MSP-50, MSP-142, MSP-40, MSP-152	925	5	8829	9.54486	0.0583688	0.0119563	0.615818
GOTERM_BP_2	GO:0043062~extracellular structure organization	11	0.448248	0.000550537	Y57G11A.2, Y39A3A.3, Y39F10C.1, Y54E2A.9, C08G5.3, Y37E11AL.4, DYB-1, T02H6.9, T02H6.7, R105.1, SYG-2	777	32	8116	3.59057	0.0639465	0.016385	0.63016
GOTERM_CC_FAT	GO:0031224~intrinsic to membrane	800	32.5998	0.000571904	Y37H2A.14, C06G4.4, T24C4.4, Y37H2A.10, ANT-1.3, F56A11.6, ZK39.10, F32B4.1, F32B4.2, Y69A2AR.31, GTL-2, C38D9.5, CLEC-266, R05C11.4, CDH-10, CDH-12, C09B9.7, W01D2.3, C09B9.2, M03E7.3, Y69A2AR.23, K06B4.4, IDA-1, GLT-3, R105.1, NAS-25, K09F6.3, CAH-5, Y69A2AR.14, Y69A2AR.19, T12G3.4, F54E4.2, Y37A1A.2, NAS-14, F20G2.6, F45E10.2, Y37D8A.5, HAF-1, TRP-2, T10E9.6, W04E12.5, W04E12.4, T10E9.4, Y37D8…	917	6608	7912	1.04457	0.0785489	0.0269001	0.675202
INTERPRO	IPR005552:Scramblase	6	0.244499	0.000578135	SCRM-8, SCRM-6, SCRM-7, SCRM-4, SCRM-5, SCRM-3	1453	8	13633	7.03699	0.382998	0.0154562	0.888716
GOTERM_BP_FAT	GO:0030198~extracellular matrix organization	9	0.366748	0.000584153	Y57G11A.2, Y39A3A.3, Y39F10C.1, Y54E2A.9, C08G5.3, Y37E11AL.4, T02H6.9, T02H6.7, R105.1	741	22	7838	4.3272	0.378876	0.0577908	0.895098
GOTERM_BP_3	GO:0030198~extracellular matrix organization	9	0.366748	0.000607944	Y57G11A.2, Y39A3A.3, Y39F10C.1, Y54E2A.9, C08G5.3, Y37E11AL.4, T02H6.9, T02H6.7, R105.1	752	22	7908	4.30198	0.173828	0.0466166	0.814955
INTERPRO	IPR005515:Vitelline membrane outer layer protein I (VOMI)	9	0.366748	0.000630998	Y57G11A.2, Y39A3A.3, Y39F10C.1, Y54E2A.9, C08G5.3, Y37E11AL.4, T02H6.9, T02H6.7, R105.1	1453	20	13633	4.2222	0.409656	0.0163354	0.969609
PIR_SUPERFAMILY	PIRSF000564:kinase-related transforming protein	12	0.488998	0.000693454	K06H7.8, F33D11.7, C50F4.10, Y38H8A.4, ZK666.8, TAG-344, B0218.5, ZK596.2, CDK-4, K08H2.5, F21F3.2, R13H9.5	518	33	4541	3.18779	0.197958	0.0310222	0.930859
PIR_SUPERFAMILY	PIRSF015994:Caenorhabditis elegans hypothetical protein F36D3.5	5	0.203749	0.000756262	F26D2.10, C18H2.5, T08G3.7, F36D3.5, F37A4.4	518	5	4541	8.76641	0.21383	0.0296251	1.01477
GOTERM_CC_FAT	GO:0031143~pseudopodium	5	0.203749	0.000810679	MSP-56, MSP-31, MSP-57, MSP-45, MSP-33, MSP-59, MSP-53, MSP-36, MSP-19, MSP-55, MSP-38, MSP-81, MSP-113, F58A6.9, MSP-49, MSP-10, MSP-79, MSP-78, MSP-64, MSP-77, MSP-76, MSP-63, MSP-3, MSP-65, MSP-51, MSP-50, MSP-142, MSP-40, MSP-152	917	5	7912	8.62814	0.109502	0.0285772	0.955868
GOTERM_MF_FAT	GO:0008316~structural constituent of vitelline membrane	9	0.366748	0.000901501	Y57G11A.2, Y39A3A.3, Y39F10C.1, Y54E2A.9, C08G5.3, Y37E11AL.4, T02H6.9, T02H6.7, R105.1	753	20	6686	3.99562	0.272012	0.0224213	1.22698
GOTERM_MF_FAT	GO:0032553~ribonucleotide binding	158	6.43847	0.000991397	K06H7.8, VY10G11R.1, CKK-1, F23F1.5, C18H7.4, ZK666.8, F26A1.3, TAG-191, CDK-4, R10D12.10, H12I13.1, F01D4.3, W09C3.1, C03C10.2, C14A4.13, W06F12.3, C27D8.1, ABT-5, F54H5.2, ABT-1, F26E4.5, FBXB-54, ZK596.2, W03A5.1, C09B9.4, ZC581.7, F57B9.8, OLD-1, R13H9.6, TPA-1, R13H9.5, M7.7, ZC581.2, W04C9.5, F26A1.4, KIN-21, KIN-24, F22B3.8, C27D6.11, T19D12.5, B0207.7, C56C10.6, ZC373.3, Y47G6A.13, Y69E1A…	753	1120	6686	1.25259	0.294709	0.0230075	1.34856
GOTERM_MF_FAT	GO:0032555~purine ribonucleotide binding	158	6.43847	0.000991397	K06H7.8, VY10G11R.1, CKK-1, F23F1.5, C18H7.4, ZK666.8, F26A1.3, TAG-191, CDK-4, R10D12.10, H12I13.1, F01D4.3, W09C3.1, C03C10.2, C14A4.13, W06F12.3, C27D8.1, ABT-5, F54H5.2, ABT-1, F26E4.5, FBXB-54, ZK596.2, W03A5.1, C09B9.4, ZC581.7, F57B9.8, OLD-1, R13H9.6, TPA-1, R13H9.5, M7.7, ZC581.2, W04C9.5, F26A1.4, KIN-21, KIN-24, F22B3.8, C27D6.11, T19D12.5, B0207.7, C56C10.6, ZC373.3, Y47G6A.13, Y69E1A…	753	1120	6686	1.25259	0.294709	0.0230075	1.34856
GOTERM_BP_5	GO:0006334~nucleosome assembly	10	0.407498	0.00153659	ZC155.2, HIS-62, HIS-61, HIS-60, HIS-48, HIL-3, HIS-70, HIS-6, Y73B6A.1, HIS-59, HIS-4, HIL-8	608	32	6749	3.46885	0.497109	0.108245	2.15596
GOTERM_BP_5	GO:0034728~nucleosome organization	10	0.407498	0.00153659	ZC155.2, HIS-62, HIS-61, HIS-60, HIS-48, HIL-3, HIS-70, HIS-6, Y73B6A.1, HIS-59, HIS-4, HIL-8	608	32	6749	3.46885	0.497109	0.108245	2.15596
GOTERM_MF_2	GO:0000166~nucleotide binding	170	6.92747	0.00157478	K06H7.8, VY10G11R.1, CKK-1, F23F1.5, C18H7.4, ZK666.8, F26A1.3, TAG-191, CDK-4, R10D12.10, CPB-2, H12I13.1, F01D4.3, C03C10.2, W09C3.1, C14A4.13, W06F12.3, C27D8.1, F07F6.1, ABT-5, F54H5.2, ABT-1, F26E4.5, FBXB-54, ZK596.2, W03A5.1, C09B9.4, ZC581.7, F57B9.8, OLD-1, R13H9.6, TPA-1, R13H9.5, M7.7, ZC581.2, W04C9.5, F26A1.4, KIN-21, KIN-24, F22B3.8, C27D6.11, T19D12.5, B0207.7, C56C10.6, ZC373.3, Y…	894	1369	8884	1.234	0.0669951	0.0114909	1.46367
COG_ONTOLOGY	General function prediction only / Signal transduction mechanisms / Transcription / DNA replication, recombination, and repair	4	0.162999	0.00184253	K09C6.8, K09C6.7, Y39G8B.5, C04G2.2	90	4	1118	12.4222	0.0432962	0.0432962	1.46852
GOTERM_BP_4	GO:0006334~nucleosome assembly	10	0.407498	0.00207896	ZC155.2, HIS-62, HIS-61, HIS-60, HIS-48, HIL-3, HIS-70, HIS-6, Y73B6A.1, HIS-59, HIS-4, HIL-8	722	32	7683	3.3254	0.621631	0.149543	2.92451
GOTERM_BP_4	GO:0034728~nucleosome organization	10	0.407498	0.00207896	ZC155.2, HIS-62, HIS-61, HIS-60, HIS-48, HIL-3, HIS-70, HIS-6, Y73B6A.1, HIS-59, HIS-4, HIL-8	722	32	7683	3.3254	0.621631	0.149543	2.92451
GOTERM_CC_3	GO:0000786~nucleosome	10	0.407498	0.00215222	ZC155.2, HIS-62, HIS-61, HIS-60, HIS-48, HIL-3, HIS-70, HIS-6, Y73B6A.1, HIS-59, HIS-4, HIL-8	958	30	9458	3.29088	0.163749	0.0351333	2.28081
GOTERM_BP_FAT	GO:0031497~chromatin assembly	10	0.407498	0.0021694	ZC155.2, HIS-62, HIS-61, HIS-60, HIS-48, HIL-3, HIS-70, HIS-6, Y73B6A.1, HIS-59, HIS-4, HIL-8	741	32	7838	3.3055	0.829664	0.178534	3.28657
GOTERM_BP_FAT	GO:0034728~nucleosome organization	10	0.407498	0.0021694	ZC155.2, HIS-62, HIS-61, HIS-60, HIS-48, HIL-3, HIS-70, HIS-6, Y73B6A.1, HIS-59, HIS-4, HIL-8	741	32	7838	3.3055	0.829664	0.178534	3.28657
GOTERM_BP_FAT	GO:0006334~nucleosome assembly	10	0.407498	0.0021694	ZC155.2, HIS-62, HIS-61, HIS-60, HIS-48, HIL-3, HIS-70, HIS-6, Y73B6A.1, HIS-59, HIS-4, HIL-8	741	32	7838	3.3055	0.829664	0.178534	3.28657
GOTERM_MF_FAT	GO:0005506~iron ion binding	46	1.87449	0.00222574	C27B7.6, DAF-9, Y71G12B.30, T16G12.7, CYP-13A7, GSP-3, GSP-4, C06A1.3, R08A2.2, Y69E1A.4, F49E11.7, CYP-33C5, F23B12.1, GLB-7, CYP-33C2, GLB-30, GLB-8, F52H3.6, D2023.1, PXN-2, PXN-1, CYP-14A3, C23G10.1, NTH-1, F58G1.3, Y54G2A.24, CYP-13B1, CYP-34A4, CAT-2, CYP-34A10, CYP-25A2, CYP-25A1, F42G8.8, CYP-34A6, ZK938.1, W03D8.2, C47A4.3, GCY-37, CYC-2.2, C34D4.2, F25B3.4, CYP-33D3, T25B9.2, GLB-18, F2…	753	262	6686	1.55893	0.543577	0.0478388	3.00403
GOTERM_BP_3	GO:0031497~chromatin assembly	10	0.407498	0.00226023	ZC155.2, HIS-62, HIS-61, HIS-60, HIS-48, HIL-3, HIS-70, HIS-6, Y73B6A.1, HIS-59, HIS-4, HIL-8	752	32	7908	3.28624	0.50861	0.132468	2.99891
GOTERM_BP_3	GO:0034728~nucleosome organization	10	0.407498	0.00226023	ZC155.2, HIS-62, HIS-61, HIS-60, HIS-48, HIL-3, HIS-70, HIS-6, Y73B6A.1, HIS-59, HIS-4, HIL-8	752	32	7908	3.28624	0.50861	0.132468	2.99891
GOTERM_MF_2	GO:0005326~neurotransmitter transporter activity	8	0.325998	0.00242595	UNC-17, MOD-5, DYB-1, SNF-10, SNF-8, SNF-5, SNF-2, F56F4.3	894	20	8884	3.97494	0.101359	0.0151514	2.24679
GOTERM_BP_5	GO:0007286~spermatid development	4	0.162999	0.00270248	SPE-15, SPE-8, SPE-10, SPE-4	608	4	6749	11.1003	0.701697	0.1587	3.7629
GOTERM_BP_5	GO:0048515~spermatid differentiation	4	0.162999	0.00270248	SPE-15, SPE-8, SPE-10, SPE-4	608	4	6749	11.1003	0.701697	0.1587	3.7629
GOTERM_CC_5	GO:0000786~nucleosome	10	0.407498	0.00271128	ZC155.2, HIS-62, HIS-61, HIS-60, HIS-48, HIL-3, HIS-70, HIS-6, Y73B6A.1, HIS-59, HIS-4, HIL-8	922	30	8803	3.18257	0.260189	0.072572	3.02582
GOTERM_CC_4	GO:0000786~nucleosome	10	0.407498	0.00271711	ZC155.2, HIS-62, HIS-61, HIS-60, HIS-48, HIL-3, HIS-70, HIS-6, Y73B6A.1, HIS-59, HIS-4, HIL-8	925	30	8829	3.18162	0.258655	0.0486578	3.02727
INTERPRO	IPR016186:C-type lectin-like	38	1.54849	0.0028158	CLEC-66, CLEC-48, CLEC-260, CLEC-82, CLEC-184, CLEC-65, CLEC-123, CLEC-60, CLEC-266, CLEC-22, CLEC-40, CLEC-242, CLEC-245, Y38H6C.8, CLEC-246, CLEC-169, CLEC-265, CLEC-42, CLEC-222, CLEC-119, CLEC-117, CLEC-94, CLEC-57, CLEC-170, CLEC-96, CLEC-78, CLEC-4, CLEC-151, CLEC-72, CLEC-73, CLEC-154, CLEC-153, CLEC-208, CLEC-52, CLEC-54, CLEC-79, CLEC-53, CLEC-175	1453	218	13633	1.63551	0.90506	0.068863	4.25934
PIR_SUPERFAMILY	PIRSF015697:uncharacterized protein	10	0.407498	0.00282281	F35F10.13, T28A11.3, T28A11.19, C17B7.4, T20D4.10, T28A11.16, T20D4.11, C17B7.3, T20D4.12, C03G6.5	518	28	4541	3.13086	0.592992	0.0950541	3.7393
PIR_SUPERFAMILY	PIRSF019658:Caenorhabditis elegans hypothetical protein F32B6.7	6	0.244499	0.00290002	SSP-19, C34D4.3, SSP-16, SSP-31, SSP-11, SSP-10	518	10	4541	5.25985	0.602892	0.0882183	3.83975
GOTERM_BP_4	GO:0007286~spermatid development	4	0.162999	0.0030624	SPE-15, SPE-8, SPE-10, SPE-4	722	4	7683	10.6413	0.761249	0.185043	4.28004
GOTERM_BP_4	GO:0048515~spermatid differentiation	4	0.162999	0.0030624	SPE-15, SPE-8, SPE-10, SPE-4	722	4	7683	10.6413	0.761249	0.185043	4.28004
GOTERM_BP_FAT	GO:0007286~spermatid development	4	0.162999	0.00311724	SPE-15, SPE-8, SPE-10, SPE-4	741	4	7838	10.5776	0.921489	0.224658	4.69056
GOTERM_BP_FAT	GO:0048515~spermatid differentiation	4	0.162999	0.00311724	SPE-15, SPE-8, SPE-10, SPE-4	741	4	7838	10.5776	0.921489	0.224658	4.69056
GOTERM_MF_FAT	GO:0017076~purine nucleotide binding	162	6.60147	0.00359747	K06H7.8, VY10G11R.1, CKK-1, F23F1.5, C18H7.4, ZK666.8, F26A1.3, TAG-191, CDK-4, R10D12.10, H12I13.1, F01D4.3, W09C3.1, C03C10.2, C14A4.13, W06F12.3, C27D8.1, ABT-5, F54H5.2, ABT-1, F26E4.5, FBXB-54, ZK596.2, W03A5.1, C09B9.4, ZC581.7, F57B9.8, OLD-1, R13H9.6, TPA-1, R13H9.5, M7.7, ZC581.2, W04C9.5, F26A1.4, KIN-21, KIN-24, F22B3.8, C27D6.11, T19D12.5, B0207.7, C56C10.6, ZC373.3, Y47G6A.13, ACDH-5…	753	1187	6686	1.21181	0.718773	0.0719067	4.81352
SP_PIR_KEYWORDS	metalloprotein	22	0.896496	0.0041318	F58G1.3, CYP-34A4, CYP-13B1, T16G12.7, CYP-25A2, CYP-34A10, CYP-13A7, F42G8.8, CYP-34A6, ZK938.1, W03D8.2, GSP-4, Y69E1A.4, F49E11.7, CYC-2.2, C34D4.2, F25B3.4, CYP-33D3, F52H3.6, SOD-5, CYP-14A3, Y40H4A.2	2377	95	19674	1.91674	0.580829	0.102987	5.09649
GOTERM_CC_2	GO:0032993~protein-DNA complex	10	0.407498	0.00439881	ZC155.2, HIS-62, HIS-61, HIS-60, HIS-48, HIL-3, HIS-70, HIS-6, Y73B6A.1, HIS-59, HIS-4, HIL-8	958	33	9458	2.99171	0.135394	0.0473367	3.77489
GOTERM_BP_5	GO:0065004~protein-DNA complex assembly	10	0.407498	0.00453955	ZC155.2, HIS-62, HIS-61, HIS-60, HIS-48, HIL-3, HIS-70, HIS-6, Y73B6A.1, HIS-59, HIS-4, HIL-8	608	37	6749	3.00009	0.869162	0.224483	6.24521
GOTERM_MF_FAT	GO:0005326~neurotransmitter transporter activity	8	0.325998	0.00459644	UNC-17, MOD-5, DYB-1, SNF-10, SNF-8, SNF-5, SNF-2, F56F4.3	753	20	6686	3.55166	0.802433	0.0861539	6.11155
PIR_SUPERFAMILY	PIRSF000925:tyrosine-protein phosphatase	6	0.244499	0.00482388	C17H12.3, T27A3.5, C33H5.16, ZK484.7, F47B3.7, F36H12.10	518	11	4541	4.78168	0.785127	0.13046	6.3112
GOTERM_BP_5	GO:0006508~proteolysis	65	2.64874	0.00505455	Y71H2AM.25, ELC-1, ACN-1, H12I13.1, SKR-10, ADT-1, Y19D10B.6, C18H2.4, SKR-15, F42G10.1, SKR-12, SKR-13, GRD-1, WRT-4, WRT-6, FBN-1, R03G8.4, CKI-1, NAS-38, NAS-32, T28A11.20, C17B7.8, NAS-30, NAS-31, F44F1.3, K02F6.1, ZMP-1, IDA-1, Y18H1A.9, CLP-3, W08F4.10, DCT-10, C08F11.7, T19D2.1, NAS-25, F49B2.6, Y42A5A.1, QUA-1, F25E5.7, R05H10.7, TRY-8, TRY-9, TRY-7, CLP-6, F54G2.2, SKR-5, T11F8.4, DUO-2,…	608	520	6749	1.38754	0.896182	0.222506	6.93033
PIR_SUPERFAMILY	PIRSF016383:uncharacterized conserved protein	4	0.162999	0.00537384	W03D8.9, K06A5.2, Y69E1A.1, W03D8.10	518	4	4541	8.76641	0.819764	0.133065	7.00681
GOTERM_CC_FAT	GO:0000786~nucleosome	10	0.407498	0.00538367	ZC155.2, HIS-62, HIS-61, HIS-60, HIS-48, HIL-3, HIS-70, HIS-6, Y73B6A.1, HIS-59, HIS-4, HIL-8	917	30	7912	2.87605	0.537887	0.143061	6.19297
GOTERM_CC_2	GO:0042995~cell projection	10	0.407498	0.00545652	MSP-56, MSP-57, MSP-31, MSP-33, MSP-59, MSP-53, MSP-19, MSP-36, MSP-55, MSP-38, F40G9.9, MSP-113, F58A6.9, MSP-10, MSP-64, MSP-63, MSP-3, MSP-65, CHE-3, MSP-40, MSP-152, MSP-45, TNC-2, MSP-81, H06I04.5, MSP-49, MSP-79, MSP-78, MSP-77, MSP-76, MSP-51, MSP-50, MSP-142, BBS-5	958	34	9458	2.90372	0.165196	0.0441359	4.66353
GOTERM_CC_3	GO:0042995~cell projection	10	0.407498	0.00545652	MSP-56, MSP-57, MSP-31, MSP-33, MSP-59, MSP-53, MSP-19, MSP-36, MSP-55, MSP-38, F40G9.9, MSP-113, F58A6.9, MSP-10, MSP-64, MSP-63, MSP-3, MSP-65, CHE-3, MSP-40, MSP-152, MSP-45, TNC-2, MSP-81, H06I04.5, MSP-49, MSP-79, MSP-78, MSP-77, MSP-76, MSP-51, MSP-50, MSP-142, BBS-5	958	34	9458	2.90372	0.365001	0.0728951	5.69085
INTERPRO	IPR000210:BTB/POZ-like	27	1.10024	0.00591407	F22E5.6, BTB-2, B0496.1, Y108F1.5, BTB-8, BATH-27, BATH-24, ZK418.2, FBXB-52, BATH-2, BATH-4, BATH-46, BATH-5, Y43E12A.3, F47D12.7, F55B11.7, KEL-10, R09A1.2, BTB-10, BTB-11, F27C8.5, BATH-13, BTB-12, BTB-13, K08E4.7, C17H12.12, R10D12.8	1453	146	13633	1.73515	0.992937	0.13556	8.7496
GOTERM_BP_4	GO:0065004~protein-DNA complex assembly	10	0.407498	0.00602912	ZC155.2, HIS-62, HIS-61, HIS-60, HIS-48, HIL-3, HIS-70, HIS-6, Y73B6A.1, HIS-59, HIS-4, HIL-8	722	37	7683	2.87602	0.940639	0.297434	8.26336
INTERPRO	IPR003609:Apple-like	8	0.325998	0.00618476	NOAH-1, F32B4.8, H03E18.1, C16D9.1, CUTL-18, LET-653, H42K12.3, C30H6.5	1453	22	13633	3.41188	0.994374	0.137576	9.1324
INTERPRO	IPR003014:PAN-1 domain	8	0.325998	0.00618476	NOAH-1, F32B4.8, H03E18.1, C16D9.1, CUTL-18, LET-653, H42K12.3, C30H6.5	1453	22	13633	3.41188	0.994374	0.137576	9.1324
INTERPRO	IPR006588:Protein of unknown function PAW	8	0.325998	0.00618476	F35F10.1, F35F10.4, T20D4.5, C04E12.2, T20D4.3, C17B7.5, C04E12.5, C04E12.4, Y50D4B.4	1453	22	13633	3.41188	0.994374	0.137576	9.1324
GOTERM_BP_FAT	GO:0065004~protein-DNA complex assembly	10	0.407498	0.00627448	ZC155.2, HIS-62, HIS-61, HIS-60, HIS-48, HIL-3, HIS-70, HIS-6, Y73B6A.1, HIS-59, HIS-4, HIL-8	741	37	7838	2.85881	0.994082	0.37271	9.23103
GOTERM_BP_5	GO:0001539~ciliary or flagellar motility	4	0.162999	0.00630465	TNC-2, F40G9.9, CHE-3, H06I04.5	608	5	6749	8.88026	0.940816	0.246261	8.57408
GOTERM_BP_5	GO:0007283~spermatogenesis	8	0.325998	0.00662831	FER-1, SPE-15, SPE-8, SPE-27, SPE-17, SPE-11, SPE-10, SPE-4	608	26	6749	3.41549	0.948836	0.236809	8.99525
GOTERM_BP_4	GO:0001539~ciliary or flagellar motility	4	0.162999	0.00712183	TNC-2, F40G9.9, CHE-3, H06I04.5	722	5	7683	8.51302	0.964485	0.309864	9.69124
GOTERM_BP_FAT	GO:0001539~ciliary or flagellar motility	4	0.162999	0.00724602	TNC-2, F40G9.9, CHE-3, H06I04.5	741	5	7838	8.46208	0.997334	0.389769	10.587
UP_SEQ_FEATURE	domain:EGF-like 1	6	0.244499	0.00730443	CDH-4, DIG-1, SPE-9, ZC116.3, LRP-1, MUA-3	250	17	3249	4.58682	0.993645	0.717659	10.4476
KEGG_PATHWAY	cel04350:TGF-beta signaling pathway	6	0.244499	0.00735208	SKR-10, SKR-5, SKR-15, SKR-9, SKR-12, SKR-13	55	36	1534	4.64848	0.367144	0.367144	7.17624
GOTERM_BP_3	GO:0001539~ciliary or flagellar motility	4	0.162999	0.00736843	TNC-2, F40G9.9, CHE-3, H06I04.5	752	5	7908	8.41277	0.901948	0.320938	9.47247
INTERPRO	IPR013098:Immunoglobulin I-set	11	0.448248	0.00778007	VER-1, DIG-1, TTN-1, F21C10.7, HIM-4, ZIG-2, UNC-73, LAD-2, PXN-2, PXN-1, SYG-2	1453	40	13633	2.58023	0.998529	0.165698	11.3581
INTERPRO	IPR002602:Protein of unknown function DB	8	0.325998	0.00808758	F13H8.5, T20G5.13, C42D4.3, Y65B4BL.1, PQN-32, F26G1.5, DAO-2, F35B3.4	1453	23	13633	3.26353	0.998864	0.167448	11.7812
INTERPRO	IPR003235:Nematode insulin-related peptide, beta type	8	0.325998	0.00808758	INS-7, INS-33, DAF-28, INS-19, INS-37, INS-5, INS-6, INS-26	1453	23	13633	3.26353	0.998864	0.167448	11.7812
GOTERM_BP_4	GO:0007283~spermatogenesis	8	0.325998	0.00836142	FER-1, SPE-15, SPE-8, SPE-27, SPE-17, SPE-11, SPE-10, SPE-4	722	26	7683	3.27424	0.980183	0.324377	11.286
GOTERM_BP_4	GO:0048232~male gamete generation	8	0.325998	0.00836142	FER-1, SPE-15, SPE-8, SPE-27, SPE-17, SPE-11, SPE-10, SPE-4	722	26	7683	3.27424	0.980183	0.324377	11.286
GOTERM_BP_FAT	GO:0007283~spermatogenesis	8	0.325998	0.00863955	FER-1, SPE-15, SPE-8, SPE-27, SPE-17, SPE-11, SPE-10, SPE-4	741	26	7838	3.25465	0.999151	0.41957	12.4989
GOTERM_BP_FAT	GO:0048232~male gamete generation	8	0.325998	0.00863955	FER-1, SPE-15, SPE-8, SPE-27, SPE-17, SPE-11, SPE-10, SPE-4	741	26	7838	3.25465	0.999151	0.41957	12.4989
KEGG_PATHWAY	cel04120:Ubiquitin mediated proteolysis	9	0.366748	0.0087529	SKR-10, SKR-5, UBC-24, SKR-15, ELC-1, SKR-9, SKR-12, SKR-13, APC-10	55	86	1534	2.91882	0.420198	0.238553	8.48971
GOTERM_BP_3	GO:0048232~male gamete generation	8	0.325998	0.0089167	FER-1, SPE-15, SPE-8, SPE-27, SPE-17, SPE-11, SPE-10, SPE-4	752	26	7908	3.23568	0.939939	0.330866	11.3541
GOTERM_CC_FAT	GO:0032993~protein-DNA complex	10	0.407498	0.0105673	ZC155.2, HIS-62, HIS-61, HIS-60, HIS-48, HIL-3, HIS-70, HIS-6, Y73B6A.1, HIS-59, HIS-4, HIL-8	917	33	7912	2.61459	0.781104	0.223682	11.822
INTERPRO	IPR001507:Endoglin/CD105 antigen	12	0.488998	0.0106434	CUTL-10, CUTL-13, FBN-1, NOAH-1, CUT-4, CUTL-25, DPY-1, CUTL-18, LET-653, CUTL-23, RAM-5, CUTL-21	1453	48	13633	2.34566	0.999868	0.209531	15.2256
SP_PIR_KEYWORDS	atp-binding	99	4.03423	0.0112547	K06H7.8, VY10G11R.1, CKK-1, C18H7.4, ZK666.8, CDK-4, H12I13.1, F01D4.3, W09C3.1, C03C10.2, W06F12.3, C14A4.13, C27D8.1, ABT-5, F26E4.5, ZK596.2, W03A5.1, ZC581.7, F57B9.8, OLD-1, R13H9.6, TPA-1, ZC581.2, KIN-21, KIN-24, F22B3.8, C27D6.11, T19D12.5, B0207.7, Y69E1A.3, H05L14.1, T09B4.7, KIN-5, KLP-17, T06C10.3, NEKL-1, OSM-3, WHT-5, HSP-70, T25B9.4, WHT-3, T25B9.5, HAF-1, SPE-8, TTN-1, WHT-6, F49C…	2377	649	19674	1.26257	0.907161	0.232102	13.3245
PIR_SUPERFAMILY	PIRSF017573:PIRSF017573	4	0.162999	0.0123002	C14A6.6, C14A6.13, W04E12.5, W04E12.4	518	5	4541	7.01313	0.980468	0.261215	15.3679
UP_SEQ_FEATURE	domain:EGF-like 5	4	0.162999	0.0123455	SPE-9, ZC116.3, LRP-1, MUA-3	250	7	3249	7.42629	0.999811	0.819908	17.0536
INTERPRO	IPR002542:Protein of unknown function DUF19	12	0.488998	0.0124388	F35F10.13, C04E12.2, C36C5.15, C04E12.4, T28A11.3, T28A11.19, C17B7.4, T20D4.10, T28A11.16, T20D4.11, T20D4.12, C17B7.3, C03G6.5	1453	49	13633	2.29779	0.999971	0.235083	17.5695
GOTERM_MF_3	GO:0005328~neurotransmitter:sodium symporter activity	6	0.244499	0.0128991	MOD-5, SNF-10, SNF-8, SNF-5, SNF-2, F56F4.3	679	16	7243	4.00018	0.632007	0.153475	12.8011
GOTERM_CC_FAT	GO:0042995~cell projection	10	0.407498	0.0129341	MSP-56, MSP-57, MSP-31, MSP-33, MSP-59, MSP-53, MSP-19, MSP-36, MSP-55, MSP-38, F40G9.9, MSP-113, F58A6.9, MSP-10, MSP-64, MSP-63, MSP-3, MSP-65, CHE-3, MSP-40, MSP-152, MSP-45, TNC-2, MSP-81, H06I04.5, MSP-49, MSP-79, MSP-78, MSP-77, MSP-76, MSP-51, MSP-50, MSP-142, BBS-5	917	34	7912	2.53769	0.844582	0.233521	14.2878
SMART	SM00613:PAW	8	0.325998	0.0135417	F35F10.1, F35F10.4, T20D4.5, C04E12.2, T20D4.3, C17B7.5, C04E12.5, C04E12.4, Y50D4B.4	684	22	5537	2.94365	0.910477	0.260409	15.4196
SMART	SM00473:PAN_AP	8	0.325998	0.0135417	NOAH-1, F32B4.8, H03E18.1, C16D9.1, CUTL-18, LET-653, H42K12.3, C30H6.5	684	22	5537	2.94365	0.910477	0.260409	15.4196
INTERPRO	IPR006570:SPK	10	0.407498	0.0135966	Y73B3B.1, Y57A10A.3, B0513.6, Y57A10A.8, R05D7.2, CSP-1, C08F11.7, Y45F10C.1, H12I13.1, C17C3.15	1453	37	13633	2.53585	0.999989	0.248569	19.0486
INTERPRO	IPR006210:EGF-like	20	0.814996	0.0144211	CDH-4, DIG-1, NLR-1, FBN-1, HIM-4, F58H1.6, LRP-1, DSL-1, Y70G10A.2, MUA-3, SLT-1, Y38C1AA.9, DSL-3, R11G1.1, SPE-9, Y37E11AL.6, Y46G5A.29, ZC116.3, C09F9.2, NRX-1	1453	105	13633	1.78717	0.999995	0.25609	20.0868
INTERPRO	IPR006209:EGF	12	0.488998	0.0144552	CDH-4, DIG-1, SPE-9, Y46G5A.29, NLR-1, FBN-1, ZC116.3, LRP-1, NRX-1, SLT-1, MUA-3, Y38C1AA.9	1453	50	13633	2.25184	0.999995	0.251348	20.1296
GOTERM_BP_FAT	GO:0006508~proteolysis	65	2.64874	0.0146898	Y71H2AM.25, ELC-1, ACN-1, H12I13.1, SKR-10, ADT-1, Y19D10B.6, C18H2.4, SKR-15, F42G10.1, SKR-12, SKR-13, GRD-1, WRT-4, WRT-6, FBN-1, R03G8.4, CKI-1, NAS-38, NAS-32, T28A11.20, C17B7.8, NAS-30, NAS-31, F44F1.3, K02F6.1, ZMP-1, IDA-1, Y18H1A.9, CLP-3, W08F4.10, DCT-10, C08F11.7, T19D2.1, NAS-25, F49B2.6, Y42A5A.1, QUA-1, F25E5.7, R05H10.7, TRY-8, TRY-9, TRY-7, CLP-6, F54G2.2, SKR-5, T11F8.4, DUO-2,…	741	520	7838	1.3222	0.999994	0.577472	20.3649
GOTERM_BP_FAT	GO:0006323~DNA packaging	10	0.407498	0.0147072	ZC155.2, HIS-62, HIS-61, HIS-60, HIS-48, HIL-3, HIS-70, HIS-6, Y73B6A.1, HIS-59, HIS-4, HIL-8	741	42	7838	2.51848	0.999994	0.552923	20.3866
GOTERM_MF_3	GO:0008233~peptidase activity	53	2.15974	0.0158098	Y71H2AM.25, ACN-1, ADT-1, Y19D10B.6, C18H2.4, F42G10.1, GRD-1, WRT-4, WRT-6, FBN-1, R03G8.4, NAS-38, NAS-32, T28A11.20, NAS-30, C17B7.8, NAS-31, F44F1.3, K02F6.1, ZMP-1, IDA-1, Y18H1A.9, CLP-3, W08F4.10, DCT-10, C08F11.7, NAS-25, T19D2.1, F49B2.6, Y42A5A.1, QUA-1, F25E5.7, R05H10.7, TRY-8, TRY-9, CLP-6, TRY-7, F54G2.2, T11F8.4, T07F10.1, AC3.5, NAS-14, ZK430.5, C17B7.10, AEX-5, BTB-13, K08E4.7, C…	679	414	7243	1.3656	0.706852	0.160792	15.476
GOTERM_BP_2	GO:0006323~DNA packaging	10	0.407498	0.0158923	ZC155.2, HIS-62, HIS-61, HIS-60, HIS-48, HIL-3, HIS-70, HIS-6, Y73B6A.1, HIS-59, HIS-4, HIL-8	777	42	8116	2.48698	0.853744	0.319195	16.798
GOTERM_CC_1	GO:0005576~extracellular region	45	1.83374	0.0159193	DIG-1, SCL-23, SCL-21, DAF-7, C06A8.6, NAS-25, T19D2.1, FLP-3, INS-26, INS-7, FLP-1, INS-33, CAH-5, C44B12.6, SCL-6, PXN-1, INS-5, C03G6.5, SCL-3, INS-6, SCL-15, WRT-4, WRT-6, SCL-17, CHT-1, Y73F4A.2, COL-34, NAS-14, INS-37, INS-19, NLP-13, Y45F10C.4, C08F11.12, FLP-13, NAS-38, NAS-32, D2062.1, DAF-28, ZC116.3, NAS-31, ZK262.3, VAP-1, ZMP-1, F32A5.4, COL-14	989	311	9662	1.41359	0.161819	0.161819	9.51326
INTERPRO	IPR011333:BTB/POZ fold	27	1.10024	0.0161288	F22E5.6, BTB-2, ELC-1, Y108F1.5, BTB-8, SKR-10, BATH-27, BATH-24, SKR-15, SKR-12, SKR-13, BATH-2, BATH-4, BATH-46, BATH-5, SKR-5, SKR-9, R09A1.2, BTB-10, F27C8.5, BATH-13, BTB-11, BTB-12, BTB-13, C16D2.1, K08E4.7, R10D12.8	1453	158	13633	1.60337	0.999999	0.270759	22.1977
INTERPRO	IPR001304:C-type lectin	39	1.58924	0.0162828	CLEC-66, CLEC-48, CLEC-260, CLEC-82, CLEC-184, CLEC-65, CLEC-123, CLEC-60, CLEC-266, CLEC-22, CLEC-40, CLEC-242, CLEC-245, Y38H6C.8, CLEC-246, CLEC-169, CLEC-265, CLEC-42, CLEC-222, CLEC-119, CLEC-117, CLEC-94, CLEC-57, CLEC-170, CLEC-96, CLEC-78, CLEC-4, CLEC-151, CLEC-72, CLEC-73, CLEC-154, CLEC-153, CLEC-208, CLEC-52, CLEC-54, CLEC-79, CLEC-236, CLEC-53, CLEC-175	1453	251	13633	1.45786	0.999999	0.267686	22.3855
KEGG_PATHWAY	cel04310:Wnt signaling pathway	7	0.285249	0.0165794	SKR-10, SKR-5, SKR-15, SKR-9, SKR-12, SKR-13, EGL-8	55	60	1534	3.25394	0.64532	0.292143	15.5249
INTERPRO	IPR002398:Peptidase C14, caspase precursor p45	4	0.162999	0.0188254	CSP-2, CSP-1, C08F11.7, CSP-3	1453	6	13633	6.2551	1	0.297174	25.4251
INTERPRO	IPR004045:Glutathione S-transferase, N-terminal	12	0.488998	0.0192137	GST-15, GST-41, GST-14, GST-4, GST-19, GST-2, GST-25, GST-24, GST-33, GST-35, GST-21, GST-31	1453	52	13633	2.16523	1	0.296836	25.8794
INTERPRO	IPR017933:Glutathione S-transferase/chloride channel, C-terminal	12	0.488998	0.0192137	GST-15, GST-41, GST-14, GST-4, GST-19, GST-2, GST-25, GST-24, GST-33, GST-35, GST-21, GST-31	1453	52	13633	2.16523	1	0.296836	25.8794
GOTERM_CC_2	GO:0043228~non-membrane-bounded organelle	70	2.85249	0.0194932	F38H4.6, MSP-31, Y48B6A.5, MSP-33, MSP-36, Y53C10A.15, MSP-38, MSP-113, Y38F2AR.10, Y73B6A.1, C54E10.1, HIS-59, C15H11.1, ARX-7, SPE-15, F54H5.3, MSP-3, C10H11.7, C35E7.9, C56G7.3, MSP-40, F13A7.1, MSP-152, IFP-1, T22B3.3, C23H4.6, HIS-62, HIS-61, TNC-2, HIS-60, W02A2.5, W03D8.5, Y113G7C.1, Y53F4B.19, CEH-37, TMD-2, DLC-6, SPE-26, FRM-8, HIL-3, F21H7.5, MSP-142, F42A9.7, F55D12.6, HIL-8, BBS-5, M…	958	535	9458	1.29175	0.477761	0.121839	15.7875
GOTERM_CC_3	GO:0043232~intracellular non-membrane-bounded organelle	70	2.85249	0.0194932	F38H4.6, MSP-31, Y48B6A.5, MSP-33, MSP-36, Y53C10A.15, MSP-38, MSP-113, Y38F2AR.10, Y73B6A.1, C54E10.1, HIS-59, C15H11.1, ARX-7, SPE-15, F54H5.3, MSP-3, C10H11.7, C35E7.9, C56G7.3, MSP-40, F13A7.1, MSP-152, IFP-1, T22B3.3, C23H4.6, HIS-62, HIS-61, TNC-2, HIS-60, W02A2.5, W03D8.5, Y113G7C.1, Y53F4B.19, CEH-37, TMD-2, DLC-6, SPE-26, FRM-8, HIL-3, F21H7.5, MSP-142, F42A9.7, F55D12.6, HIL-8, BBS-5, M…	958	535	9458	1.29175	0.804836	0.208176	19.007
INTERPRO	IPR000152:EGF-type aspartate/asparagine hydroxylation conserved site	9	0.366748	0.0199045	DIG-1, Y46G5A.29, NLR-1, FBN-1, ZC116.3, HIM-4, LRP-1, SLT-1, MUA-3	1453	33	13633	2.55891	1	0.30036	26.6811
COG_ONTOLOGY	Secondary metabolites biosynthesis, transport, and catabolism	13	0.529747	0.0217803	DAF-9, CYP-13B1, CYP-34A4, CYP-34A10, CYP-25A2, CYP-13A7, CYP-25A1, CYP-34A6, CYP-33C5, CYP-33D3, CYP-33C2, BCMO-1, CYP-14A3	90	81	1118	1.99369	0.410514	0.23222	16.1927
INTERPRO	IPR000175:Sodium:neurotransmitter symporter	6	0.244499	0.0218054	MOD-5, SNF-10, SNF-8, SNF-5, SNF-2, F56F4.3	1453	16	13633	3.5185	1	0.318541	28.8457
SP_PIR_KEYWORDS	acetylation	10	0.407498	0.0243661	MSP-56, MSP-31, MSP-57, MSP-33, MSP-59, MSP-53, MSP-19, MSP-36, MSP-55, MSP-38, HIS-6, MSP-113, HIS-59, F58A6.9, MSP-10, MSP-64, MSP-63, MSP-3, MSP-65, HIS-70, MSP-40, MSP-152, MSP-45, HIS-61, HIS-60, MSP-81, MSP-49, MSP-79, MSP-78, MSP-77, MSP-76, MSP-51, HIL-3, MSP-50, MSP-142	2377	36	19674	2.29912	0.994373	0.404305	26.7766
UP_SEQ_FEATURE	domain:EGF-like 3	4	0.162999	0.0264122	CDH-4, SPE-9, LRP-1, MUA-3	250	9	3249	5.776	1	0.95396	33.1614
GOTERM_MF_FAT	GO:0005328~neurotransmitter:sodium symporter activity	6	0.244499	0.0269471	MOD-5, SNF-10, SNF-8, SNF-5, SNF-2, F56F4.3	753	16	6686	3.32968	0.999933	0.397146	31.197
INTERPRO	IPR002110:Ankyrin	17	0.692747	0.0273025	F26D2.10, F36D3.5, K09D9.11, F56H1.3, C01G10.1, C18H2.3, C18H2.5, T08G3.7, C18H2.4, OCR-2, TRP-2, C38D9.5, SPE-41, F37A4.4, Y67A10A.3, C18H2.1, F40E12.2	1453	90	13633	1.77228	1	0.376076	34.774
SP_PIR_KEYWORDS	egf-like domain	21	0.855746	0.0278685	CDH-4, DIG-1, NLR-1, FBN-1, HIM-4, LRP-1, NAS-25, Y70G10A.2, MUA-3, SLT-1, Y38C1AA.9, DSL-3, NAS-38, NAS-32, SPE-9, Y46G5A.29, ZC116.3, NAS-30, NAS-31, C09F9.2, NRX-1	2377	106	19674	1.63975	0.997356	0.417012	30.0291
GOTERM_BP_FAT	GO:0016337~cell-cell adhesion	6	0.244499	0.0280926	CDH-10, CDH-4, FRK-1, CDH-12, Y37E11AL.6, CDH-7	741	19	7838	3.34029	1	0.76577	35.4973
INTERPRO	IPR002656:Acyltransferase 3	13	0.529747	0.0287358	OAC-31, OAC-30, OAC-36, OAC-49, OAC-23, OAC-22, OAC-9, OAC-37, OAC-56, OAC-58, OAC-27, OAC-19, OAC-52	1453	62	13633	1.96733	1	0.385483	36.242
GOTERM_BP_3	GO:0016337~cell-cell adhesion	6	0.244499	0.0287371	CDH-10, CDH-4, FRK-1, CDH-12, Y37E11AL.6, CDH-7	752	19	7908	3.32083	0.999894	0.681602	32.4532
SMART	SM00241:ZP	12	0.488998	0.0288359	CUTL-10, CUTL-13, FBN-1, NOAH-1, CUT-4, CUTL-25, DPY-1, CUTL-18, LET-653, CUTL-23, RAM-5, CUTL-21	684	48	5537	2.02376	0.994366	0.437545	30.1902
INTERPRO	IPR018097:EGF-like calcium-binding, conserved site	8	0.325998	0.0293089	DIG-1, Y46G5A.29, FBN-1, ZC116.3, HIM-4, LRP-1, SLT-1, MUA-3	1453	29	13633	2.58832	1	0.385554	36.8203
INTERPRO	IPR001232:SKP1 component	7	0.285249	0.0297457	SKR-10, SKR-5, SKR-15, ELC-1, SKR-9, SKR-12, SKR-13	1453	23	13633	2.85559	1	0.384238	37.2577
GOTERM_BP_4	GO:0006836~neurotransmitter transport	9	0.366748	0.0298697	SNN-1, UNC-17, MOD-5, DYB-1, SNF-10, SNF-8, SNF-5, SNF-2, F56F4.3	722	40	7683	2.39429	0.999999	0.724021	35.1113
INTERPRO	IPR003599:Immunoglobulin subtype	10	0.407498	0.0301373	VER-1, DIG-1, TTN-1, ZIG-6, F21C10.7, HIM-4, ZIG-2, UNC-73, LAD-2, SYG-2	1453	42	13633	2.23397	1	0.382518	37.6474
INTERPRO	IPR009564:Protein of unknown function DUF1179	4	0.162999	0.0303637	H38K22.6, H38K22.7, C06C6.8, Y57G7A.3	1453	7	13633	5.36152	1	0.379226	37.8717
GOTERM_BP_FAT	GO:0006836~neurotransmitter transport	9	0.366748	0.0308391	SNN-1, UNC-17, MOD-5, DYB-1, SNF-10, SNF-8, SNF-5, SNF-2, F56F4.3	741	40	7838	2.37996	1	0.777257	38.2457
GOTERM_MF_5	GO:0004252~serine-type endopeptidase activity	11	0.448248	0.0310626	IDA-1, T11F8.4, AEX-5, FBN-1, BTB-13, AC3.5, F25E5.7, TRY-8, C06C3.8, TRY-9, TRY-7	540	48	4951	2.10112	0.966892	0.573436	29.9046
INTERPRO	IPR015737:Testis-specific serine-threonine kinase	3	0.122249	0.0315979	Y38H8A.4, TAG-344, C27D6.11	1453	3	13633	9.38266	1	0.385814	39.0813
UP_SEQ_FEATURE	repeat:Kelch 3	3	0.122249	0.0316505	F47D12.7, SPE-26, KEL-10	250	4	3249	9.747	1	0.958008	38.3743
UP_SEQ_FEATURE	repeat:Kelch 2	3	0.122249	0.0316505	F47D12.7, SPE-26, KEL-10	250	4	3249	9.747	1	0.958008	38.3743
UP_SEQ_FEATURE	repeat:Kelch 5	3	0.122249	0.0316505	F47D12.7, SPE-26, KEL-10	250	4	3249	9.747	1	0.958008	38.3743
UP_SEQ_FEATURE	repeat:Kelch 6	3	0.122249	0.0316505	F47D12.7, SPE-26, KEL-10	250	4	3249	9.747	1	0.958008	38.3743
UP_SEQ_FEATURE	repeat:Kelch 1	3	0.122249	0.0316505	F47D12.7, SPE-26, KEL-10	250	4	3249	9.747	1	0.958008	38.3743
UP_SEQ_FEATURE	short sequence motif:Cell attachment site	3	0.122249	0.0316505	CDH-4, SPE-9, PAT-2	250	4	3249	9.747	1	0.958008	38.3743
UP_SEQ_FEATURE	repeat:Kelch 4	3	0.122249	0.0316505	F47D12.7, SPE-26, KEL-10	250	4	3249	9.747	1	0.958008	38.3743
GOTERM_BP_3	GO:0006836~neurotransmitter transport	9	0.366748	0.0318033	SNN-1, UNC-17, MOD-5, DYB-1, SNF-10, SNF-8, SNF-5, SNF-2, F56F4.3	752	40	7908	2.36609	0.999961	0.676194	35.2668
SMART	SM00583:SPK	10	0.407498	0.0322211	Y73B3B.1, Y57A10A.3, B0513.6, Y57A10A.8, R05D7.2, CSP-1, C08F11.7, Y45F10C.1, H12I13.1, C17C3.15	684	37	5537	2.18785	0.996963	0.439936	33.121
SMART	SM00225:BTB	27	1.10024	0.0325619	F22E5.6, BTB-2, B0496.1, Y108F1.5, BTB-8, BATH-27, BATH-24, ZK418.2, FBXB-52, BATH-2, BATH-4, BATH-46, BATH-5, Y43E12A.3, F47D12.7, F55B11.7, KEL-10, R09A1.2, BTB-10, BTB-11, F27C8.5, BATH-13, BTB-12, BTB-13, K08E4.7, C17H12.12, R10D12.8	684	146	5537	1.49703	0.997147	0.412965	33.4097
INTERPRO	IPR001878:Zinc finger, CCHC-type	9	0.366748	0.0326463	F54G2.2, F49F1.8, C38D9.2, F15D4.5, ZC15.1, DCT-10, K02F6.1, K08D12.3, Y43F4A.3	1453	36	13633	2.34566	1	0.390369	40.0914
INTERPRO	IPR001881:EGF-like calcium-binding	8	0.325998	0.0348296	DIG-1, Y46G5A.29, FBN-1, ZC116.3, HIM-4, LRP-1, SLT-1, MUA-3	1453	30	13633	2.50204	1	0.405076	42.145
GOTERM_MF_4	GO:0005179~hormone activity	10	0.407498	0.035345	INS-7, INS-33, DAF-28, INS-19, NLP-13, INS-37, INS-5, FLP-3, INS-6, INS-26	627	45	6132	2.17331	0.974535	0.457594	33.028
INTERPRO	IPR016897:E3 ubiquitin ligase, SCF complex, Skp subunit	6	0.244499	0.0357766	SKR-10, SKR-5, SKR-15, SKR-9, SKR-12, SKR-13	1453	18	13633	3.12755	1	0.408148	43.015
GOTERM_BP_FAT	GO:0048610~reproductive cellular process	14	0.570497	0.0357985	Y54E2A.9, T02H6.9, SPE-4, T02H6.7, R105.1, Y57G11A.2, Y39A3A.3, Y39F10C.1, SPE-15, SPE-8, C08G5.3, Y37E11AL.4, SPE-10, T02G5.11	741	80	7838	1.85108	1	0.808065	42.9334
PIR_SUPERFAMILY	PIRSF028860:Caenorhabditis elegans hypothetical protein C24D10.1	3	0.122249	0.0358835	Y57G11C.6, C17H12.5, C24D10.1	518	3	4541	8.76641	0.999991	0.563973	38.9004
PIR_SUPERFAMILY	PIRSF016363:hypothetical protein, Caenorhabditis elegans C24D10.2 type	3	0.122249	0.0358835	F11G11.4, C24D10.2, C27D6.3	518	3	4541	8.76641	0.999991	0.563973	38.9004
PIR_SUPERFAMILY	PIRSF019680:PIRSF019680	3	0.122249	0.0358835	C06C6.7, C06C6.6, F36G9.13	518	3	4541	8.76641	0.999991	0.563973	38.9004
PIR_SUPERFAMILY	PIRSF015812:Caenorhabditis elegans hypothetical protein F57E7.1	3	0.122249	0.0358835	C33G8.4, F20A1.1, F20A1.10	518	3	4541	8.76641	0.999991	0.563973	38.9004
PIR_SUPERFAMILY	PIRSF016405:Caenorhabditis elegans hypothetical protein F36D3.4	3	0.122249	0.0358835	F36D3.4, F53B6.4, F21H7.5	518	3	4541	8.76641	0.999991	0.563973	38.9004
PIR_SUPERFAMILY	PIRSF015801:Caenorhabditis elegans hypothetical protein K08D10.7	3	0.122249	0.0358835	SCRM-8, SCRM-6, SCRM-5	518	3	4541	8.76641	0.999991	0.563973	38.9004
GOTERM_BP_4	GO:0007156~homophilic cell adhesion	5	0.203749	0.0358916	CDH-10, CDH-4, CDH-12, Y37E11AL.6, CDH-7	722	14	7683	3.80046	1	0.758881	40.6253
UP_SEQ_FEATURE	disulfide bond	25	1.01874	0.0361384	CDH-4, DIG-1, CHT-1, DAF-7, LRP-1, NAS-14, NAS-25, F26C11.1, MUA-3, NAS-38, INS-7, NAS-32, SPE-9, IFE-5, F44E2.4, ZC116.3, SOL-1, NAS-30, DOP-3, NAS-31, ZK262.3, F32A5.4, PXN-1, INS-6, TRX-2	250	215	3249	1.51116	1	0.958191	42.536
GOTERM_BP_FAT	GO:0007156~homophilic cell adhesion	5	0.203749	0.0365995	CDH-10, CDH-4, CDH-12, Y37E11AL.6, CDH-7	741	14	7838	3.77771	1	0.797977	43.6585
GOTERM_CC_4	GO:0043232~intracellular non-membrane-bounded organelle	70	2.85249	0.0370093	F38H4.6, MSP-31, Y48B6A.5, MSP-33, MSP-36, Y53C10A.15, MSP-38, MSP-113, Y38F2AR.10, Y73B6A.1, C54E10.1, HIS-59, C15H11.1, ARX-7, SPE-15, F54H5.3, MSP-3, C10H11.7, C35E7.9, C56G7.3, MSP-40, F13A7.1, MSP-152, IFP-1, T22B3.3, C23H4.6, HIS-62, HIS-61, TNC-2, HIS-60, W02A2.5, W03D8.5, Y113G7C.1, Y53F4B.19, CEH-37, TMD-2, DLC-6, SPE-26, FRM-8, HIL-3, F21H7.5, MSP-142, F42A9.7, F55D12.6, HIL-8, BBS-5, M…	925	535	8829	1.24886	0.984208	0.447117	34.6932
GOTERM_CC_5	GO:0043232~intracellular non-membrane-bounded organelle	70	2.85249	0.0370877	F38H4.6, MSP-31, Y48B6A.5, MSP-33, MSP-36, Y53C10A.15, MSP-38, MSP-113, Y38F2AR.10, Y73B6A.1, C54E10.1, HIS-59, C15H11.1, ARX-7, SPE-15, F54H5.3, MSP-3, C10H11.7, C35E7.9, C56G7.3, MSP-40, F13A7.1, MSP-152, IFP-1, T22B3.3, C23H4.6, HIS-62, HIS-61, TNC-2, HIS-60, W02A2.5, W03D8.5, Y113G7C.1, Y53F4B.19, CEH-37, TMD-2, DLC-6, SPE-26, FRM-8, HIL-3, F21H7.5, MSP-142, F42A9.7, F55D12.6, HIL-8, BBS-5, M…	922	535	8803	1.24923	0.984929	0.567859	34.7997
GOTERM_BP_3	GO:0048610~reproductive cellular process	14	0.570497	0.0372967	Y54E2A.9, T02H6.9, SPE-4, T02H6.7, R105.1, Y57G11A.2, Y39A3A.3, Y39F10C.1, SPE-15, SPE-8, C08G5.3, Y37E11AL.4, SPE-10, T02G5.11	752	80	7908	1.84029	0.999993	0.696846	40.0381
GOTERM_MF_FAT	GO:0004252~serine-type endopeptidase activity	11	0.448248	0.0380078	IDA-1, T11F8.4, AEX-5, FBN-1, BTB-13, AC3.5, F25E5.7, TRY-8, C06C3.8, TRY-9, TRY-7	753	48	6686	2.03481	0.999999	0.494386	41.1636
GOTERM_BP_2	GO:0048610~reproductive cellular process	14	0.570497	0.0391097	Y54E2A.9, T02H6.9, SPE-4, T02H6.7, R105.1, Y57G11A.2, Y39A3A.3, Y39F10C.1, SPE-15, SPE-8, C08G5.3, Y37E11AL.4, SPE-10, T02G5.11	777	80	8116	1.82793	0.991666	0.549727	36.7432
GOTERM_MF_3	GO:0004497~monooxygenase activity	17	0.692747	0.0397992	DAF-9, CYP-34A4, CYP-13B1, Y73F4A.2, CAT-2, CYP-25A2, CYP-34A10, CYP-13A7, CYP-25A1, CYP-34A6, CYP-33C5, CYP-33D3, CYP-33C2, C09F9.2, T10E9.3, CYP-14A3, FMO-5	679	107	7243	1.69478	0.956159	0.323552	34.8508
GOTERM_BP_5	GO:0030259~lipid glycosylation	9	0.366748	0.0399963	UGT-41, UGT-11, UGT-30, UGT-13, UGT-36, UGT-25, UGT-14, UGT-8, UGT-40	608	44	6749	2.27052	1	0.781393	43.928
INTERPRO	IPR000742:EGF-like, type 3	17	0.692747	0.0425889	CDH-4, NLR-1, FBN-1, HIM-4, F58H1.6, LRP-1, DSL-1, Y70G10A.2, MUA-3, SLT-1, Y38C1AA.9, DSL-3, SPE-9, Y46G5A.29, ZC116.3, C09F9.2, NRX-1	1453	95	13633	1.679	1	0.459874	48.9226
GOTERM_BP_5	GO:0045773~positive regulation of axon extension	3	0.122249	0.0428621	UNC-53, ZAG-1, UNC-73	608	4	6749	8.32525	1	0.778275	46.2543
GOTERM_BP_5	GO:0010720~positive regulation of cell development	3	0.122249	0.0428621	UNC-53, ZAG-1, UNC-73	608	4	6749	8.32525	1	0.778275	46.2543
GOTERM_BP_5	GO:0045597~positive regulation of cell differentiation	3	0.122249	0.0428621	UNC-53, ZAG-1, UNC-73	608	4	6749	8.32525	1	0.778275	46.2543
GOTERM_BP_5	GO:0050769~positive regulation of neurogenesis	3	0.122249	0.0428621	UNC-53, ZAG-1, UNC-73	608	4	6749	8.32525	1	0.778275	46.2543
GOTERM_BP_5	GO:0050772~positive regulation of axonogenesis	3	0.122249	0.0428621	UNC-53, ZAG-1, UNC-73	608	4	6749	8.32525	1	0.778275	46.2543
GOTERM_BP_5	GO:0031346~positive regulation of cell projection organization	3	0.122249	0.0428621	UNC-53, ZAG-1, UNC-73	608	4	6749	8.32525	1	0.778275	46.2543
GOTERM_BP_FAT	GO:0043053~dauer entry	7	0.285249	0.043147	DAF-9, OSM-3, DYF-11, DAF-6, CHE-3, CHE-11, DYF-2	741	28	7838	2.6444	1	0.834254	49.271
INTERPRO	IPR016073:SKP1 component, POZ	7	0.285249	0.0434824	SKR-10, SKR-5, SKR-15, ELC-1, SKR-9, SKR-12, SKR-13	1453	25	13633	2.62714	1	0.461345	49.6535
GOTERM_MF_5	GO:0004175~endopeptidase activity	38	1.54849	0.0436416	IDA-1, CLP-3, W08F4.10, DCT-10, C08F11.7, NAS-25, T19D2.1, ADT-1, Y19D10B.6, C18H2.4, F42G10.1, F25E5.7, TRY-8, TRY-9, CLP-6, TRY-7, F54G2.2, T11F8.4, FBN-1, AC3.5, NAS-14, NAS-38, NAS-32, C17B7.10, AEX-5, T28A11.20, NAS-30, C17B7.8, NAS-31, BTB-13, F44F1.3, CSP-2, CSP-1, CSP-3, K02F6.1, ZMP-1, CPT-3, C06C3.8	540	257	4951	1.35566	0.991927	0.618577	39.4953
GOTERM_BP_3	GO:0043053~dauer entry	7	0.285249	0.0442177	DAF-9, OSM-3, DYF-11, DAF-6, CHE-3, CHE-11, DYF-2	752	28	7908	2.62899	0.999999	0.724996	45.5858
INTERPRO	IPR007125:Histone core	6	0.244499	0.044428	HIS-62, HIS-61, HIS-60, HIS-48, HIS-70, HIS-6, HIS-59, HIS-4	1453	19	13633	2.96294	1	0.463172	50.4164
INTERPRO	IPR013525:ABC-2 type transporter	4	0.162999	0.0447995	WHT-4, WHT-5, WHT-3, WHT-6	1453	8	13633	4.69133	1	0.460591	50.713
GOTERM_BP_FAT	GO:0030908~protein splicing	4	0.162999	0.0456697	WRT-4, WRT-6, QUA-1, GRD-1	741	9	7838	4.70115	1	0.837027	51.2905
GOTERM_BP_FAT	GO:0016539~intein-mediated protein splicing	4	0.162999	0.0456697	WRT-4, WRT-6, QUA-1, GRD-1	741	9	7838	4.70115	1	0.837027	51.2905
PIR_SUPERFAMILY	PIRSF028729:E3_ubiquit_lig_SCF_Skp	6	0.244499	0.0457084	SKR-10, SKR-5, SKR-15, SKR-9, SKR-12, SKR-13	518	18	4541	2.92214	1	0.629115	46.781
SP_PIR_KEYWORDS	kinase	43	1.75224	0.0460508	R11E3.1, K06H7.8, C35E7.10, CKK-1, KIN-26, C18H7.4, CDK-4, Y4C6A.1, F01D4.3, Y69E1A.3, C25A8.5, VER-1, Y52D5A.2, C03C10.2, C55C3.4, F26E4.5, Y116A8C.38, KIN-5, FRK-1, K09B11.5, T06C10.3, W01B6.5, ZC581.7, F57B9.8, NEKL-1, OLD-1, TPA-1, D1044.1, T25B9.4, T25B9.5, ZK622.1, C34F11.5, CMK-1, SPE-8, KIN-21, TTN-1, KIN-24, F59A3.8, ZK507.3, F22B3.8, Y116A8C.24, T21G5.1, Y43C5B.2	2377	268	19674	1.328	0.99995	0.56178	44.8785
GOTERM_BP_4	GO:0045597~positive regulation of cell differentiation	3	0.122249	0.0464175	UNC-53, ZAG-1, UNC-73	722	4	7683	7.98096	1	0.818664	49.2303
GOTERM_BP_4	GO:0010720~positive regulation of cell development	3	0.122249	0.0464175	UNC-53, ZAG-1, UNC-73	722	4	7683	7.98096	1	0.818664	49.2303
GOTERM_BP_4	GO:0031346~positive regulation of cell projection organization	3	0.122249	0.0464175	UNC-53, ZAG-1, UNC-73	722	4	7683	7.98096	1	0.818664	49.2303
GOTERM_BP_4	GO:0050772~positive regulation of axonogenesis	3	0.122249	0.0464175	UNC-53, ZAG-1, UNC-73	722	4	7683	7.98096	1	0.818664	49.2303
GOTERM_BP_FAT	GO:0045773~positive regulation of axon extension	3	0.122249	0.046945	UNC-53, ZAG-1, UNC-73	741	4	7838	7.9332	1	0.831572	52.2825
GOTERM_BP_FAT	GO:0045597~positive regulation of cell differentiation	3	0.122249	0.046945	UNC-53, ZAG-1, UNC-73	741	4	7838	7.9332	1	0.831572	52.2825
GOTERM_BP_FAT	GO:0010720~positive regulation of cell development	3	0.122249	0.046945	UNC-53, ZAG-1, UNC-73	741	4	7838	7.9332	1	0.831572	52.2825
GOTERM_BP_FAT	GO:0031346~positive regulation of cell projection organization	3	0.122249	0.046945	UNC-53, ZAG-1, UNC-73	741	4	7838	7.9332	1	0.831572	52.2825
GOTERM_BP_FAT	GO:0050772~positive regulation of axonogenesis	3	0.122249	0.046945	UNC-53, ZAG-1, UNC-73	741	4	7838	7.9332	1	0.831572	52.2825
GOTERM_BP_FAT	GO:0050769~positive regulation of neurogenesis	3	0.122249	0.046945	UNC-53, ZAG-1, UNC-73	741	4	7838	7.9332	1	0.831572	52.2825
GOTERM_BP_3	GO:0045597~positive regulation of cell differentiation	3	0.122249	0.0474624	UNC-53, ZAG-1, UNC-73	752	4	7908	7.88697	1	0.719834	48.0197
GOTERM_BP_3	GO:0031346~positive regulation of cell projection organization	3	0.122249	0.0474624	UNC-53, ZAG-1, UNC-73	752	4	7908	7.88697	1	0.719834	48.0197
GOTERM_MF_3	GO:0020037~heme binding	21	0.855746	0.0495506	DAF-9, CYP-34A4, CYP-13B1, CYP-25A2, CYP-34A10, CYP-13A7, CYP-25A1, CYP-34A6, GCY-37, CYP-33C5, CYC-2.2, GLB-7, CYP-33D3, GLB-18, GLB-30, CYP-33C2, GLB-8, D2023.1, PXN-2, PXN-1, CYP-14A3	679	145	7243	1.5449	0.980023	0.352603	41.5024
GOTERM_BP_5	GO:0006333~chromatin assembly or disassembly	10	0.407498	0.0497061	ZC155.2, HIS-62, HIS-61, HIS-60, HIS-48, HIL-3, HIS-70, HIS-6, Y73B6A.1, HIS-59, HIS-4, HIL-8	608	54	6749	2.05562	1	0.803648	51.4519
GOTERM_BP_FAT	GO:0030259~lipid glycosylation	9	0.366748	0.0510562	UGT-41, UGT-11, UGT-30, UGT-13, UGT-36, UGT-25, UGT-14, UGT-8, UGT-40	741	44	7838	2.1636	1	0.843857	55.3534
INTERPRO	IPR015897:CHK kinase-like	7	0.285249	0.0516203	D1044.1, F59B1.10, C18B10.6, Y11D7A.8, F20D6.5, C29F7.2, T16G1.4	1453	26	13633	2.5261	1	0.504637	55.8745
GOTERM_BP_1	GO:0009987~cellular process	395	16.0962	0.0524333	VY10G11R.1, CKK-1, TAG-191, UNC-73, H12I13.1, C31H1.5, F32B4.2, SKR-10, NHR-7, C14A4.13, C27D8.1, SKR-15, F54H5.2, T22C1.8, SKR-12, SKR-13, C56G7.3, W03A5.1, F17B5.1, CDH-10, CDH-12, C09B9.4, CYN-10, F42C5.5, F57B9.8, M7.7, CYC-2.2, KIN-21, KIN-24, UNC-53, HIL-3, C27D6.11, HIL-8, DAF-8, DAF-9, IDA-1, B0207.7, F40G9.9, R105.1, R09E10.9, C33H5.16, K09F6.3, UGT-41, C46A5.1, Y57G11A.2, CAH-5, NHR-95,…	826	3833	8513	1.06209	0.620706	0.384131	32.7666
SMART	SM00181:EGF	20	0.814996	0.0535853	CDH-4, DIG-1, NLR-1, FBN-1, HIM-4, F58H1.6, LRP-1, DSL-1, Y70G10A.2, MUA-3, SLT-1, Y38C1AA.9, DSL-3, R11G1.1, SPE-9, Y37E11AL.6, Y46G5A.29, ZC116.3, C09F9.2, NRX-1	684	105	5537	1.54191	0.999942	0.556185	49.1593
INTERPRO	IPR001930:Peptidase M1, membrane alanine aminopeptidase	5	0.203749	0.0536839	F49B2.6, Y42A5A.1, T07F10.1, AC3.5, R03G8.4	1453	14	13633	3.35095	1	0.513203	57.3336
INTERPRO	IPR016072:SKP1 component, dimerisation	6	0.244499	0.0542218	SKR-10, SKR-5, SKR-15, SKR-9, SKR-12, SKR-13	1453	20	13633	2.8148	1	0.511364	57.7064
GOTERM_MF_FAT	GO:0008138~protein tyrosine/serine/threonine phosphatase activity	7	0.285249	0.054317	F54F12.1, T20B6.1, Y69A2AR.19, H06I04.5, T28F4.3, F47B3.7, F26A3.4	753	25	6686	2.48616	1	0.607852	53.4418
SMART	SM00512:Skp1	7	0.285249	0.0552162	SKR-10, SKR-5, SKR-15, ELC-1, SKR-9, SKR-12, SKR-13	684	23	5537	2.4637	0.999957	0.538532	50.225
INTERPRO	IPR014044:SCP-like extracellular	8	0.325998	0.0553523	SCL-15, D2062.1, SCL-17, SCL-23, SCL-21, SCL-6, VAP-1, SCL-3	1453	33	13633	2.27458	1	0.513451	58.4801
GOTERM_BP_4	GO:0048638~regulation of developmental growth	5	0.203749	0.0562084	UNC-119, UNC-53, ZAG-1, UNC-73, TAX-2	722	16	7683	3.3254	1	0.854809	56.1792
INTERPRO	IPR003439:ABC transporter-like	11	0.448248	0.0566003	PGP-13, WHT-4, WHT-5, PGP-14, WHT-3, PGP-12, HAF-1, ABT-5, WHT-6, PGP-8, CFT-1	1453	54	13633	1.91128	1	0.516228	59.3188
GOTERM_CC_5	GO:0009288~flagellin-based flagellum	3	0.122249	0.0568349	TNC-2, F40G9.9, H06I04.5	922	4	8803	7.16079	0.998489	0.661255	48.4288
GOTERM_CC_4	GO:0009288~flagellin-based flagellum	3	0.122249	0.0568669	TNC-2, F40G9.9, H06I04.5	925	4	8829	7.15865	0.998404	0.552927	48.3917
SP_PIR_KEYWORDS	nucleosome core	6	0.244499	0.0570474	HIS-62, HIS-61, HIS-60, HIS-48, HIS-70, HIS-6, HIS-59, HIS-4	2377	18	19674	2.75894	0.999996	0.61282	52.3894
SP_PIR_KEYWORDS	cell projection	6	0.244499	0.0570474	MSP-56, MSP-31, MSP-57, MSP-45, MSP-33, MSP-59, MSP-53, MSP-36, MSP-19, MSP-55, MSP-38, MSP-81, MSP-113, F58A6.9, MSP-49, MSP-10, MSP-79, MSP-78, MSP-64, MSP-77, MSP-76, MSP-63, MSP-3, MSP-65, MSP-51, MSP-50, MSP-142, CHE-3, MSP-40, MSP-152	2377	18	19674	2.75894	0.999996	0.61282	52.3894
GOTERM_BP_FAT	GO:0030516~regulation of axon extension	5	0.203749	0.0572648	UNC-119, UNC-53, ZAG-1, UNC-73, TAX-2	741	16	7838	3.3055	1	0.865005	59.6427
GOTERM_BP_FAT	GO:0048638~regulation of developmental growth	5	0.203749	0.0572648	UNC-119, UNC-53, ZAG-1, UNC-73, TAX-2	741	16	7838	3.3055	1	0.865005	59.6427
GOTERM_BP_3	GO:0048638~regulation of developmental growth	5	0.203749	0.0583057	UNC-119, UNC-53, ZAG-1, UNC-73, TAX-2	752	16	7908	3.28624	1	0.765672	55.4412
INTERPRO	IPR002138:Peptidase C14, caspase non-catalytic subunit p10	3	0.122249	0.0587568	CSP-2, CSP-1, CSP-3	1453	4	13633	7.03699	1	0.524583	60.7308
GOTERM_BP_FAT	GO:0007635~chemosensory behavior	6	0.244499	0.0595152	UNC-119, ODR-4, CHE-3, ODR-1, CEH-37, DYF-2	741	23	7838	2.75937	1	0.864709	61.0999
GOTERM_MF_FAT	GO:0005179~hormone activity	10	0.407498	0.0597555	INS-7, INS-33, DAF-28, INS-19, NLP-13, INS-37, INS-5, FLP-3, INS-6, INS-26	753	45	6686	1.97314	1	0.626876	56.9761
PIR_SUPERFAMILY	PIRSF019646:uncharacterized conserved protein	14	0.570497	0.0602503	FBXA-2, FBXA-71, FBXA-104, FBXA-143, FBXA-193, FBXA-42, FBXA-108, FBXA-30, FBXA-224, FBXA-39, FBXA-120, FBXA-44, FBXA-153, R05C11.2	518	72	4541	1.70458	1	0.709185	56.7329
INTERPRO	IPR012877:Uncharacterised kinase D1044.1	7	0.285249	0.060625	D1044.1, F59B1.10, C18B10.6, Y11D7A.8, F20D6.5, C29F7.2, T16G1.4	1453	27	13633	2.43254	1	0.530849	61.9169
GOTERM_BP_3	GO:0007635~chemosensory behavior	6	0.244499	0.0607692	UNC-119, ODR-4, CHE-3, ODR-1, CEH-37, DYF-2	752	23	7908	2.74329	1	0.754912	56.9844
INTERPRO	IPR006141:Intein splicing site	4	0.162999	0.0620002	WRT-4, WRT-6, QUA-1, GRD-1	1453	9	13633	4.17007	1	0.533965	62.7685
INTERPRO	IPR013032:EGF-like region, conserved site	27	1.10024	0.0628041	CDH-4, DIG-1, NLR-1, HIM-4, NAS-25, Y26D4A.12, DSL-3, Y38C1AA.9, DSL-2, Y37E11AL.6, Y46G5A.29, F45E4.6, C09F9.2, Y48G8AR.2, FBN-1, LRP-1, Y69H2.10, F58H1.6, Y70G10A.2, SLT-1, MUA-3, NAS-38, NAS-32, SPE-9, ZC116.3, NAS-30, NAS-31	1453	179	13633	1.41526	1	0.533653	63.2579
SP_PIR_KEYWORDS	hydrolase	80	3.25998	0.0634838	Y71G12B.31, Y71G12B.30, ZK484.7, W03F11.4, C06A1.3, ADT-1, F23B12.1, T22C1.8, F52H3.6, Y40H4A.2, WRT-4, Y54G2A.24, WRT-6, CHT-1, F36H1.3, T20B6.1, Y113G7C.1, W03D8.2, F26A3.4, NAS-38, K07C11.7, NAS-32, F20H11.4, C34D4.2, PAF-1, C17H12.3, NAS-30, NAS-31, ZK262.3, ZMP-1, ACE-3, F26B1.5, C27B7.6, C15H7.3, T16G12.7, Y22D7AR.12, R08C7.8, M04G7.2, T19D2.1, NAS-25, ZC477.2, F09C8.1, GSP-3, C33H5.16, F26…	2377	553	19674	1.19737	0.999999	0.626122	56.3361
INTERPRO	IPR001283:Allergen V5/Tpx-1 related	8	0.325998	0.063566	SCL-15, D2062.1, SCL-17, SCL-23, SCL-21, SCL-6, VAP-1, SCL-3	1453	34	13633	2.20768	1	0.53311	63.7164
GOTERM_BP_FAT	GO:0006333~chromatin assembly or disassembly	10	0.407498	0.0641244	ZC155.2, HIS-62, HIS-61, HIS-60, HIS-48, HIL-3, HIS-70, HIS-6, Y73B6A.1, HIS-59, HIS-4, HIL-8	741	54	7838	1.95881	1	0.874744	63.9322
PIR_SUPERFAMILY	PIRSF016364:Caenorhabditis elegans hypothetical protein K06H6.2	3	0.122249	0.0663932	Y40H7A.4, Y39F10A.3, Y55F3AM.11	518	4	4541	6.57481	1	0.723375	60.3941
SMART	SM00409:IG	10	0.407498	0.0663963	VER-1, DIG-1, TTN-1, ZIG-6, F21C10.7, HIM-4, ZIG-2, UNC-73, LAD-2, SYG-2	684	42	5537	1.92739	0.999995	0.580464	56.9959
GOTERM_MF_FAT	GO:0004175~endopeptidase activity	38	1.54849	0.0666339	IDA-1, CLP-3, W08F4.10, DCT-10, C08F11.7, NAS-25, T19D2.1, ADT-1, Y19D10B.6, C18H2.4, F42G10.1, F25E5.7, TRY-8, TRY-9, CLP-6, TRY-7, F54G2.2, T11F8.4, FBN-1, AC3.5, NAS-14, NAS-38, NAS-32, C17B7.10, AEX-5, T28A11.20, NAS-30, C17B7.8, NAS-31, BTB-13, F44F1.3, CSP-2, CSP-1, CSP-3, K02F6.1, ZMP-1, CPT-3, C06C3.8	753	257	6686	1.31287	1	0.651931	61.09
GOTERM_BP_5	GO:0030307~positive regulation of cell growth	3	0.122249	0.0672338	UNC-53, ZAG-1, UNC-73	608	5	6749	6.6602	1	0.874331	62.7113
GOTERM_BP_5	GO:0048639~positive regulation of developmental growth	3	0.122249	0.0672338	UNC-53, ZAG-1, UNC-73	608	5	6749	6.6602	1	0.874331	62.7113
SMART	SM00343:ZnF_C2HC	9	0.366748	0.0677075	F54G2.2, F49F1.8, C38D9.2, F15D4.5, ZC15.1, DCT-10, K02F6.1, K08D12.3, Y43F4A.3	684	36	5537	2.02376	0.999996	0.562764	57.7319
SMART	SM00179:EGF_CA	8	0.325998	0.0679168	DIG-1, Y46G5A.29, FBN-1, ZC116.3, HIM-4, LRP-1, SLT-1, MUA-3	684	30	5537	2.15867	0.999996	0.540704	57.8483
GOTERM_BP_5	GO:0050767~regulation of neurogenesis	6	0.244499	0.0680922	CMK-1, UNC-119, UNC-53, ZAG-1, UNC-73, TAX-2	608	25	6749	2.66408	1	0.86057	63.1947
GOTERM_BP_5	GO:0045664~regulation of neuron differentiation	6	0.244499	0.0680922	CMK-1, UNC-119, UNC-53, ZAG-1, UNC-73, TAX-2	608	25	6749	2.66408	1	0.86057	63.1947
GOTERM_CC_FAT	GO:0009288~flagellin-based flagellum	3	0.122249	0.068501	TNC-2, F40G9.9, H06I04.5	917	4	7912	6.4711	0.999961	0.718722	56.845
SP_PIR_KEYWORDS	disulfide bond	39	1.58924	0.069348	CDH-4, DIG-1, DAF-7, NAS-25, F26C11.1, DPY-5, INS-7, DPY-13, COL-79, PXN-1, COL-91, COL-7, TRX-2, COL-90, INS-6, COL-13, COL-12, CHT-1, COL-34, LRP-1, NAS-14, MUA-3, BLI-1, NAS-38, COL-145, NAS-32, SQT-1, LON-3, SPE-9, IFE-5, F44E2.4, NAS-30, ZC116.3, SOL-1, NAS-31, DOP-3, ZK262.3, F32A5.4, COL-14	2377	247	19674	1.30687	1	0.634386	59.6673
UP_SEQ_FEATURE	domain:EGF-like 7	3	0.122249	0.0714283	ZC116.3, LRP-1, MUA-3	250	6	3249	6.498	1	0.996592	67.2228
UP_SEQ_FEATURE	domain:EGF-like 2; calcium-binding	3	0.122249	0.0714283	DIG-1, ZC116.3, LRP-1	250	6	3249	6.498	1	0.996592	67.2228
GOTERM_BP_5	GO:0050770~regulation of axonogenesis	5	0.203749	0.0718583	UNC-119, UNC-53, ZAG-1, UNC-73, TAX-2	608	18	6749	3.08342	1	0.859251	65.2477
GOTERM_BP_5	GO:0010975~regulation of neuron projection development	5	0.203749	0.0718583	UNC-119, UNC-53, ZAG-1, UNC-73, TAX-2	608	18	6749	3.08342	1	0.859251	65.2477
GOTERM_BP_5	GO:0010769~regulation of cell morphogenesis involved in differentiation	5	0.203749	0.0718583	UNC-119, UNC-53, ZAG-1, UNC-73, TAX-2	608	18	6749	3.08342	1	0.859251	65.2477
GOTERM_BP_4	GO:0030307~positive regulation of cell growth	3	0.122249	0.0726147	UNC-53, ZAG-1, UNC-73	722	5	7683	6.38476	1	0.904346	65.8759
GOTERM_BP_4	GO:0048639~positive regulation of developmental growth	3	0.122249	0.0726147	UNC-53, ZAG-1, UNC-73	722	5	7683	6.38476	1	0.904346	65.8759
GOTERM_BP_FAT	GO:0030307~positive regulation of cell growth	3	0.122249	0.073411	UNC-53, ZAG-1, UNC-73	741	5	7838	6.34656	1	0.899889	69.0632
GOTERM_BP_FAT	GO:0048639~positive regulation of developmental growth	3	0.122249	0.073411	UNC-53, ZAG-1, UNC-73	741	5	7838	6.34656	1	0.899889	69.0632
GOTERM_BP_3	GO:0030307~positive regulation of cell growth	3	0.122249	0.0741918	UNC-53, ZAG-1, UNC-73	752	5	7908	6.30957	1	0.800853	64.5587
GOTERM_BP_3	GO:0048639~positive regulation of developmental growth	3	0.122249	0.0741918	UNC-53, ZAG-1, UNC-73	752	5	7908	6.30957	1	0.800853	64.5587
GOTERM_BP_4	GO:0045793~positive regulation of cell size	4	0.162999	0.0767622	UNC-53, ZAG-1, SPE-10, UNC-73	722	11	7683	3.86955	1	0.902817	67.9891
INTERPRO	IPR005071:Protein of unknown function DUF274	6	0.244499	0.0772412	DOD-20, TAG-244, C18H7.11, Y46D2A.2, C34H4.1, Y46D2A.1	1453	22	13633	2.55891	1	0.601281	71.0873
GOTERM_BP_FAT	GO:0045793~positive regulation of cell size	4	0.162999	0.0778948	UNC-53, ZAG-1, SPE-10, UNC-73	741	11	7838	3.8464	1	0.905624	71.2883
GOTERM_BP_5	GO:0060284~regulation of cell development	6	0.244499	0.0783539	CMK-1, UNC-119, UNC-53, ZAG-1, UNC-73, TAX-2	608	26	6749	2.56161	1	0.868171	68.5403
GOTERM_BP_4	GO:0051960~regulation of nervous system development	6	0.244499	0.0788831	CMK-1, UNC-119, UNC-53, ZAG-1, UNC-73, TAX-2	722	25	7683	2.55391	1	0.895358	69.022
GOTERM_BP_4	GO:0050767~regulation of neurogenesis	6	0.244499	0.0788831	CMK-1, UNC-119, UNC-53, ZAG-1, UNC-73, TAX-2	722	25	7683	2.55391	1	0.895358	69.022
INTERPRO	IPR004046:Glutathione S-transferase, C-terminal	10	0.407498	0.0792327	GST-15, GST-41, GST-14, GST-4, GST-19, GST-2, GST-25, GST-24, GST-33, GST-31	1453	50	13633	1.87653	1	0.606019	72.0357
INTERPRO	IPR003598:Immunoglobulin subtype 2	10	0.407498	0.0792327	VER-1, DIG-1, TTN-1, F21C10.7, HIM-4, ZIG-2, LAD-2, PXN-2, PXN-1, SYG-2	1453	50	13633	1.87653	1	0.606019	72.0357
GOTERM_BP_FAT	GO:0051960~regulation of nervous system development	6	0.244499	0.0805293	CMK-1, UNC-119, UNC-53, ZAG-1, UNC-73, TAX-2	741	25	7838	2.53862	1	0.905531	72.5249
GOTERM_BP_FAT	GO:0045664~regulation of neuron differentiation	6	0.244499	0.0805293	CMK-1, UNC-119, UNC-53, ZAG-1, UNC-73, TAX-2	741	25	7838	2.53862	1	0.905531	72.5249
GOTERM_BP_FAT	GO:0050767~regulation of neurogenesis	6	0.244499	0.0805293	CMK-1, UNC-119, UNC-53, ZAG-1, UNC-73, TAX-2	741	25	7838	2.53862	1	0.905531	72.5249
INTERPRO	IPR000884:Thrombospondin, type 1 repeat	9	0.366748	0.081174	C11H1.5, ADT-1, C27A7.8, SPON-1, C36B7.5, H42K12.3, T19D2.1, Y73E7A.8, NAS-38	1453	43	13633	1.96381	1	0.61036	72.9321
GOTERM_BP_4	GO:0010769~regulation of cell morphogenesis involved in differentiation	5	0.203749	0.0815025	UNC-119, UNC-53, ZAG-1, UNC-73, TAX-2	722	18	7683	2.95591	1	0.889826	70.255
GOTERM_BP_4	GO:0010975~regulation of neuron projection development	5	0.203749	0.0815025	UNC-119, UNC-53, ZAG-1, UNC-73, TAX-2	722	18	7683	2.95591	1	0.889826	70.255
INTERPRO	IPR001767:Peptidase C46, hedgehog protein, hint region	4	0.162999	0.0817633	WRT-4, WRT-6, QUA-1, GRD-1	1453	10	13633	3.75306	1	0.608269	73.1988
INTERPRO	IPR003586:Hedgehog/intein hint domain, C-terminal	4	0.162999	0.0817633	WRT-4, WRT-6, QUA-1, GRD-1	1453	10	13633	3.75306	1	0.608269	73.1988
INTERPRO	IPR013078:Phosphoglycerate mutase	4	0.162999	0.0817633	F53B6.7, F09C12.8, C52E4.7, F55A11.11	1453	10	13633	3.75306	1	0.608269	73.1988
INTERPRO	IPR003587:Hedgehog/intein hint, N-terminal	4	0.162999	0.0817633	WRT-4, WRT-6, QUA-1, GRD-1	1453	10	13633	3.75306	1	0.608269	73.1988
GOTERM_BP_3	GO:0051960~regulation of nervous system development	6	0.244499	0.0821527	CMK-1, UNC-119, UNC-53, ZAG-1, UNC-73, TAX-2	752	25	7908	2.52383	1	0.814061	68.447
SMART	SM00248:ANK	17	0.692747	0.0822601	F26D2.10, F36D3.5, K09D9.11, F56H1.3, C01G10.1, C18H2.3, C18H2.5, T08G3.7, C18H2.4, OCR-2, TRP-2, C38D9.5, SPE-41, F37A4.4, Y67A10A.3, C18H2.1, F40E12.2	684	90	5537	1.52906	1	0.590885	65.1592
INTERPRO	IPR014782:Peptidase M1, membrane alanine aminopeptidase, N-terminal	5	0.203749	0.0823875	F49B2.6, Y42A5A.1, T07F10.1, AC3.5, R03G8.4	1453	16	13633	2.93208	1	0.606385	73.4787
GOTERM_BP_FAT	GO:0050770~regulation of axonogenesis	5	0.203749	0.0829601	UNC-119, UNC-53, ZAG-1, UNC-73, TAX-2	741	18	7838	2.93822	1	0.904893	73.6216
GOTERM_BP_FAT	GO:0010769~regulation of cell morphogenesis involved in differentiation	5	0.203749	0.0829601	UNC-119, UNC-53, ZAG-1, UNC-73, TAX-2	741	18	7838	2.93822	1	0.904893	73.6216
GOTERM_BP_FAT	GO:0010975~regulation of neuron projection development	5	0.203749	0.0829601	UNC-119, UNC-53, ZAG-1, UNC-73, TAX-2	741	18	7838	2.93822	1	0.904893	73.6216
GOTERM_MF_FAT	GO:0000166~nucleotide binding	170	6.92747	0.083686	K06H7.8, VY10G11R.1, CKK-1, F23F1.5, C18H7.4, ZK666.8, F26A1.3, TAG-191, CDK-4, R10D12.10, CPB-2, H12I13.1, F01D4.3, C03C10.2, W09C3.1, C14A4.13, W06F12.3, C27D8.1, F07F6.1, ABT-5, F54H5.2, ABT-1, F26E4.5, FBXB-54, ZK596.2, W03A5.1, C09B9.4, ZC581.7, F57B9.8, OLD-1, R13H9.6, TPA-1, R13H9.5, M7.7, ZC581.2, W04C9.5, F26A1.4, KIN-21, KIN-24, F22B3.8, C27D6.11, T19D12.5, B0207.7, C56C10.6, ZC373.3, Y…	753	1369	6686	1.1026	1	0.722466	69.7693
SP_PIR_KEYWORDS	Symport	7	0.285249	0.0851134	GLT-3, MOD-5, SNF-10, SNF-8, SNF-5, SNF-2, F56F4.3	2377	26	19674	2.22837	1	0.688868	67.4979
GOTERM_BP_5	GO:0030258~lipid modification	10	0.407498	0.0861483	UGT-41, UGT-11, UGT-30, UGT-13, UGT-36, UGT-25, UGT-14, UGT-8, UGT-40, F25C8.1	608	60	6749	1.85005	1	0.879898	72.1083
GOTERM_BP_5	GO:0009075~histidine family amino acid metabolic process	4	0.162999	0.0863142	Y73F4A.2, Y51H4A.7, C09F9.2, T10E9.3	608	12	6749	3.70011	1	0.867013	72.1799
GOTERM_MF_FAT	GO:0015370~solute:sodium symporter activity	7	0.285249	0.0868253	GLT-3, MOD-5, SNF-10, SNF-8, SNF-5, SNF-2, F56F4.3	753	28	6686	2.21979	1	0.721645	71.1566
GOTERM_MF_3	GO:0005102~receptor binding	12	0.488998	0.0883667	INS-7, INS-33, DAF-28, DAF-7, C44B12.6, INS-19, NLP-13, INS-37, INS-5, FLP-3, INS-6, INS-26	679	75	7243	1.70675	0.999194	0.509527	62.3227
GOTERM_CC_FAT	GO:0005576~extracellular region	45	1.83374	0.0901844	DIG-1, SCL-23, SCL-21, DAF-7, C06A8.6, NAS-25, T19D2.1, FLP-3, INS-26, INS-7, FLP-1, INS-33, CAH-5, C44B12.6, SCL-6, PXN-1, INS-5, C03G6.5, SCL-3, INS-6, SCL-15, WRT-4, WRT-6, SCL-17, CHT-1, Y73F4A.2, COL-34, NAS-14, INS-37, INS-19, NLP-13, Y45F10C.4, C08F11.12, FLP-13, NAS-38, NAS-32, D2062.1, DAF-28, ZC116.3, NAS-31, ZK262.3, VAP-1, ZMP-1, F32A5.4, COL-14	917	311	7912	1.24844	0.999999	0.777252	67.3495
GOTERM_BP_4	GO:0060284~regulation of cell development	6	0.244499	0.0904875	CMK-1, UNC-119, UNC-53, ZAG-1, UNC-73, TAX-2	722	26	7683	2.45568	1	0.902824	74.1462
INTERPRO	IPR011600:Peptidase C14, caspase catalytic	3	0.122249	0.0911159	CSP-2, CSP-1, CSP-3	1453	5	13633	5.62959	1	0.640393	77.1166
INTERPRO	IPR010601:Protein of unknown function DUF1182	3	0.122249	0.0911159	F16D3.6, B0546.5, Y69H2.1	1453	5	13633	5.62959	1	0.640393	77.1166
SMART	SM00587:CHK	7	0.285249	0.091914	D1044.1, F59B1.10, C18B10.6, Y11D7A.8, F20D6.5, C29F7.2, T16G1.4	684	26	5537	2.17943	1	0.612521	69.4031
GOTERM_BP_FAT	GO:0060284~regulation of cell development	6	0.244499	0.0923339	CMK-1, UNC-119, UNC-53, ZAG-1, UNC-73, TAX-2	741	26	7838	2.44098	1	0.921682	77.479
INTERPRO	IPR002213:UDP-glucuronosyl/UDP-glucosyltransferase	14	0.570497	0.092835	K02E11.3, UGT-42, UGT-41, UGT-11, UGT-30, UGT-64, UGT-13, UGT-36, UGT-25, UGT-14, K02E11.6, T19H12.3, UGT-8, UGT-40	1453	82	13633	1.60192	1	0.642924	77.7756
GOTERM_BP_5	GO:0046626~regulation of insulin receptor signaling pathway	3	0.122249	0.0949654	OSM-3, DAF-28, DAF-6	608	6	6749	5.55016	1	0.88044	75.6893
COG_ONTOLOGY	Amino acid transport and metabolism	8	0.325998	0.0950395	F38H4.5, F49B2.6, T22B7.3, T07F10.1, HDL-1, AC3.5, F01D5.7, F01D4.8	90	50	1118	1.98756	0.908985	0.550182	55.1163
UP_SEQ_FEATURE	domain:EGF-like 6	3	0.122249	0.0950615	ZC116.3, LRP-1, MUA-3	250	7	3249	5.56971	1	0.998984	77.7644
GOTERM_BP_FAT	GO:0009075~histidine family amino acid metabolic process	4	0.162999	0.0968406	Y73F4A.2, Y51H4A.7, C09F9.2, T10E9.3	741	12	7838	3.52587	1	0.925291	79.1395
GOTERM_BP_FAT	GO:0006547~histidine metabolic process	4	0.162999	0.0968406	Y73F4A.2, Y51H4A.7, C09F9.2, T10E9.3	741	12	7838	3.52587	1	0.925291	79.1395
GOTERM_BP_FAT	GO:0006548~histidine catabolic process	4	0.162999	0.0968406	Y73F4A.2, Y51H4A.7, C09F9.2, T10E9.3	741	12	7838	3.52587	1	0.925291	79.1395
GOTERM_BP_FAT	GO:0009077~histidine family amino acid catabolic process	4	0.162999	0.0968406	Y73F4A.2, Y51H4A.7, C09F9.2, T10E9.3	741	12	7838	3.52587	1	0.925291	79.1395
INTERPRO	IPR002413:Ves allergen	5	0.203749	0.0990459	SCL-15, SCL-23, SCL-6, VAP-1, SCL-3	1453	17	13633	2.7596	1	0.663326	80.0118
GOTERM_MF_2	GO:0046906~tetrapyrrole binding	21	0.855746	0.0991077	DAF-9, CYP-34A4, CYP-13B1, CYP-25A2, CYP-34A10, CYP-13A7, CYP-25A1, CYP-34A6, GCY-37, CYP-33C5, CYC-2.2, GLB-7, CYP-33D3, GLB-18, GLB-30, CYP-33C2, GLB-8, D2023.1, PXN-2, PXN-1, CYP-14A3	894	147	8884	1.41962	0.98987	0.436751	62.3356

## Sheet: AWK107.g3vs_CF3050
Category	Term	Count	%	PValue	Genes	List Total	Pop Hits	Pop Total	Fold Enrichment	Bonferroni	Benjamini	FDR
GOTERM_BP_5	GO:0006464~protein modification process	180	7.27273	2.33124e-43	R06B10.1, K06H7.8, VY10G11R.1, CKK-1, C18H7.4, ZK666.8, F26A1.3, TAG-191, CDK-4, R10D12.10, ZK484.7, F01D4.3, C03C10.2, C14A4.13, W06F12.3, C27D8.1, UBC-24, F54H5.2, CDK-2, T22C1.8, W03F8.2, F26E4.5, ZK596.2, ZK809.1, C09B9.4, C07E3.4, ZC581.7, F57B9.8, F42C5.5, F55H12.5, OLD-1, R13H9.5, M7.7, ZC581.2, PCM-1, F20H11.4, F52C6.12, F26A1.4, KIN-21, KIN-24, Y80D3A.8, F22B3.8, Y39B6A.30, C27D6.11, T19…	606	711	6749	2.81948	9.69796e-41	9.69796e-41	3.27018e-40
GOTERM_BP_FAT	GO:0006793~phosphorus metabolic process	177	7.15152	1.03925e-42	R06B10.1, K06H7.8, VY10G11R.1, CKK-1, C18H7.4, ZK666.8, F26A1.3, TAG-191, CDK-4, R10D12.10, ZK484.7, F01D4.3, C03C10.2, C14A4.13, W06F12.3, C27D8.1, F54H5.2, CDK-2, T22C1.8, W03F8.2, F26E4.5, ZK596.2, ZK809.1, C09B9.4, T26E3.7, C07E3.4, ZC581.7, F57B9.8, F42C5.5, F55H12.5, OLD-1, R13H9.5, M7.7, ZC581.2, F20H11.4, F26A1.4, KIN-21, KIN-24, Y80D3A.8, F22B3.8, Y39B6A.30, C27D6.11, T19D12.5, K04C1.5, …	727	665	7838	2.86961	8.27242e-40	8.27242e-40	1.5942e-39
GOTERM_BP_FAT	GO:0006796~phosphate metabolic process	177	7.15152	1.03925e-42	R06B10.1, K06H7.8, VY10G11R.1, CKK-1, C18H7.4, ZK666.8, F26A1.3, TAG-191, CDK-4, R10D12.10, ZK484.7, F01D4.3, C03C10.2, C14A4.13, W06F12.3, C27D8.1, F54H5.2, CDK-2, T22C1.8, W03F8.2, F26E4.5, ZK596.2, ZK809.1, C09B9.4, T26E3.7, C07E3.4, ZC581.7, F57B9.8, F42C5.5, F55H12.5, OLD-1, R13H9.5, M7.7, ZC581.2, F20H11.4, F26A1.4, KIN-21, KIN-24, Y80D3A.8, F22B3.8, Y39B6A.30, C27D6.11, T19D12.5, K04C1.5, …	727	665	7838	2.86961	8.27242e-40	8.27242e-40	1.5942e-39
GOTERM_BP_4	GO:0006796~phosphate metabolic process	177	7.15152	1.06086e-42	R06B10.1, K06H7.8, VY10G11R.1, CKK-1, C18H7.4, ZK666.8, F26A1.3, TAG-191, CDK-4, R10D12.10, ZK484.7, F01D4.3, C03C10.2, C14A4.13, W06F12.3, C27D8.1, F54H5.2, CDK-2, T22C1.8, W03F8.2, F26E4.5, ZK596.2, ZK809.1, C09B9.4, T26E3.7, C07E3.4, ZC581.7, F57B9.8, F42C5.5, F55H12.5, OLD-1, R13H9.5, M7.7, ZC581.2, F20H11.4, F26A1.4, KIN-21, KIN-24, Y80D3A.8, F22B3.8, Y39B6A.30, C27D6.11, T19D12.5, K04C1.5, …	714	665	7683	2.86407	4.48743e-40	4.48743e-40	1.49173e-39
GOTERM_BP_3	GO:0006793~phosphorus metabolic process	177	7.15152	1.58927e-42	R06B10.1, K06H7.8, VY10G11R.1, CKK-1, C18H7.4, ZK666.8, F26A1.3, TAG-191, CDK-4, R10D12.10, ZK484.7, F01D4.3, C03C10.2, C14A4.13, W06F12.3, C27D8.1, F54H5.2, CDK-2, T22C1.8, W03F8.2, F26E4.5, ZK596.2, ZK809.1, C09B9.4, T26E3.7, C07E3.4, ZC581.7, F57B9.8, F42C5.5, F55H12.5, OLD-1, R13H9.5, M7.7, ZC581.2, F20H11.4, F26A1.4, KIN-21, KIN-24, Y80D3A.8, F22B3.8, Y39B6A.30, C27D6.11, T19D12.5, K04C1.5, …	735	665	7908	2.86372	4.64067e-40	4.64067e-40	2.11499e-39
GOTERM_BP_4	GO:0043412~biopolymer modification	181	7.31313	3.15042e-38	R06B10.1, K06H7.8, VY10G11R.1, CKK-1, C18H7.4, ZK666.8, F26A1.3, TAG-191, CDK-4, R10D12.10, ZK484.7, F01D4.3, C03C10.2, C14A4.13, W06F12.3, C27D8.1, UBC-24, F54H5.2, CDK-2, T22C1.8, W03F8.2, F26E4.5, ZK596.2, ZK809.1, C09B9.4, C07E3.4, ZC581.7, F57B9.8, F42C5.5, F55H12.5, OLD-1, R13H9.5, M7.7, ZC581.2, PCM-1, F20H11.4, F52C6.12, F26A1.4, KIN-21, KIN-24, Y80D3A.8, F22B3.8, Y39B6A.30, C27D6.11, T19…	714	740	7683	2.63196	1.33263e-35	6.66314e-36	4.42996e-35
GOTERM_BP_FAT	GO:0006468~protein amino acid phosphorylation	119	4.80808	6.35198e-29	K06H7.8, VY10G11R.1, CKK-1, C18H7.4, ZK666.8, F26A1.3, TAG-191, CDK-4, R10D12.10, F01D4.3, C03C10.2, C14A4.13, W06F12.3, C27D8.1, CDK-2, F54H5.2, W03F8.2, F26E4.5, ZK596.2, C09B9.4, ZC581.7, F57B9.8, OLD-1, R13H9.5, ZC581.2, M7.7, F26A1.4, KIN-21, KIN-24, F22B3.8, C27D6.11, T19D12.5, K04C1.5, B0207.7, C56C10.6, Y47G6A.13, Y69E1A.3, H05L14.1, KIN-9, F21F3.2, KIN-5, ODR-1, T06C10.3, NEKL-4, Y65B4A.…	727	437	7838	2.93587	5.05618e-26	2.52809e-26	9.74389e-26
INTERPRO	IPR003125:Protein of unknown function WSN	42	1.69697	1.652e-28	R06B10.1, M70.3, M70.1, C06C6.7, F36D3.5, C06C6.6, NHR-266, Y22D7AR.12, Y39B6A.18, K09D9.11, F56H1.3, C01G10.1, F36G9.13, C01G5.4, D1065.3, W03F11.4, K09F6.3, B0524.4, F58D5.6, C18H2.5, T08G3.7, C38D9.5, H20J04.1, Y57G7A.6, Y67A10A.3, Y69A2AR.19, C18H2.1, F40E12.2, F26D2.10, C09B9.7, T20B6.2, T16A1.2, Y48G1C.5, Y113G7C.1, H06I04.5, F07E5.8, Y53H1C.3, T20H9.6, Y80D3A.8, K02F6.3, F37A4.4, Y39B6A.30	1438	56	13633	7.1104	1.43063e-25	1.43063e-25	2.56222e-25
SMART	SM00453:WSN	42	1.69697	3.2047e-27	R06B10.1, M70.3, M70.1, C06C6.7, F36D3.5, C06C6.6, NHR-266, Y22D7AR.12, Y39B6A.18, K09D9.11, F56H1.3, C01G10.1, F36G9.13, C01G5.4, D1065.3, W03F11.4, K09F6.3, B0524.4, F58D5.6, C18H2.5, T08G3.7, C38D9.5, H20J04.1, Y57G7A.6, Y67A10A.3, Y69A2AR.19, C18H2.1, F40E12.2, F26D2.10, C09B9.7, T20B6.2, T16A1.2, Y48G1C.5, Y113G7C.1, H06I04.5, F07E5.8, Y53H1C.3, T20H9.6, Y80D3A.8, K02F6.3, F37A4.4, Y39B6A.30	640	56	5537	6.48867	5.8646e-25	5.8646e-25	3.95828e-24
INTERPRO	IPR000242:Protein-tyrosine phosphatase, receptor/non-receptor type	52	2.10101	3.76109e-26	R06B10.1, F38H4.4, ZK484.7, W03F11.4, T22C1.8, Y116A8C.37, C50F2.5, ZK809.1, Y57G11C.6, W01B6.6, F36H1.3, T20B6.1, C07E3.4, F42C5.5, F55H12.5, Y113G7C.1, F20H11.4, C17H12.3, C17H12.5, Y80D3A.8, Y39B6A.30, C15H7.3, M05B5.1, C48B6.4, Y22D7AR.12, Y39B6A.18, C33H5.16, K09F6.3, T28F4.3, C46A5.1, T04F3.3, Y54F10BM.3, F35C11.2, C43E11.5, F40G12.10, Y69A2AR.19, B0207.1, ZK354.8, F54F12.1, Y48G1C.5, C24D1…	1438	93	13633	5.30094	3.2571e-23	1.62855e-23	5.8334e-23
GOTERM_BP_5	GO:0016310~phosphorylation	123	4.9697	4.39789e-26	K06H7.8, VY10G11R.1, CKK-1, C18H7.4, ZK666.8, F26A1.3, TAG-191, CDK-4, R10D12.10, F01D4.3, C03C10.2, C14A4.13, W06F12.3, C27D8.1, CDK-2, F54H5.2, W03F8.2, F26E4.5, ZK596.2, C09B9.4, T26E3.7, ZC581.7, F57B9.8, OLD-1, R13H9.5, ZC581.2, M7.7, F26A1.4, KIN-21, KIN-24, F22B3.8, C27D6.11, T19D12.5, K04C1.5, B0207.7, C56C10.6, Y47G6A.13, ASG-1, Y69E1A.3, H05L14.1, KIN-9, F21F3.2, KIN-5, ODR-1, T06C10.3,…	606	514	6749	2.66507	1.82952e-23	9.14761e-24	6.1692e-23
SMART	SM00194:PTPc	52	2.10101	1.07714e-24	R06B10.1, F38H4.4, ZK484.7, W03F11.4, T22C1.8, Y116A8C.37, C50F2.5, ZK809.1, Y57G11C.6, W01B6.6, F36H1.3, T20B6.1, C07E3.4, F42C5.5, F55H12.5, Y113G7C.1, F20H11.4, C17H12.3, C17H12.5, Y80D3A.8, Y39B6A.30, C15H7.3, M05B5.1, C48B6.4, Y22D7AR.12, Y39B6A.18, C33H5.16, K09F6.3, T28F4.3, C46A5.1, T04F3.3, Y54F10BM.3, F35C11.2, C43E11.5, F40G12.10, Y69A2AR.19, B0207.1, ZK354.8, F54F12.1, Y48G1C.5, C24D1…	640	93	5537	4.83743	1.97116e-22	9.85581e-23	1.33042e-21
INTERPRO	IPR000719:Protein kinase, core	116	4.68687	1.51468e-24	K06H7.8, VY10G11R.1, CKK-1, C18H7.4, ZK666.8, F26A1.3, TAG-191, CDK-4, R10D12.10, F01D4.3, C03C10.2, C14A4.13, W06F12.3, C27D8.1, CDK-2, F54H5.2, W03F8.2, F26E4.5, ZK596.2, C09B9.4, ZC581.7, F57B9.8, OLD-1, R13H9.5, ZC581.2, M7.7, F26A1.4, KIN-21, KIN-24, F22B3.8, C27D6.11, T19D12.5, K04C1.5, B0207.7, C56C10.6, Y47G6A.13, Y69E1A.3, H05L14.1, KIN-9, F21F3.2, KIN-5, ODR-1, T06C10.3, NEKL-4, Y65B4A.…	1438	404	13633	2.72213	1.31172e-21	4.37239e-22	2.34925e-21
GOTERM_BP_FAT	GO:0016310~phosphorylation	123	4.9697	2.2816e-24	K06H7.8, VY10G11R.1, CKK-1, C18H7.4, ZK666.8, F26A1.3, TAG-191, CDK-4, R10D12.10, F01D4.3, C03C10.2, C14A4.13, W06F12.3, C27D8.1, CDK-2, F54H5.2, W03F8.2, F26E4.5, ZK596.2, C09B9.4, T26E3.7, ZC581.7, F57B9.8, OLD-1, R13H9.5, ZC581.2, M7.7, F26A1.4, KIN-21, KIN-24, F22B3.8, C27D6.11, T19D12.5, K04C1.5, B0207.7, C56C10.6, Y47G6A.13, ASG-1, Y69E1A.3, H05L14.1, KIN-9, F21F3.2, KIN-5, ODR-1, T06C10.3,…	727	514	7838	2.57996	1.81615e-21	6.05385e-22	3.49996e-21
GOTERM_MF_5	GO:0004672~protein kinase activity	121	4.88889	1.30222e-23	K06H7.8, VY10G11R.1, CKK-1, C18H7.4, ZK666.8, F26A1.3, TAG-191, CDK-4, R10D12.10, F01D4.3, C03C10.2, C14A4.13, W06F12.3, C27D8.1, CDK-2, F54H5.2, W03F8.2, F26E4.5, ZK596.2, C09B9.4, ZC581.7, F57B9.8, OLD-1, W05H12.1, R13H9.5, ZC581.2, M7.7, F26A1.4, KIN-21, KIN-24, F22B3.8, C27D6.11, T19D12.5, K04C1.5, B0207.7, C56C10.6, Y47G6A.13, Y69E1A.3, H05L14.1, KIN-9, F21F3.2, KIN-5, ODR-1, T06C10.3, NEKL-…	540	448	4951	2.47632	1.56266e-21	1.56266e-21	1.49486e-20
GOTERM_MF_FAT	GO:0004721~phosphoprotein phosphatase activity	71	2.86869	1.54378e-23	R06B10.1, Y71G12B.30, F38H4.4, ZK484.7, W03F11.4, C06A1.3, F23B12.1, T22C1.8, Y116A8C.37, F52H3.6, C50F2.5, ZK809.1, W01B6.6, Y57G11C.6, F36H1.3, T20B6.1, C07E3.4, F42C5.5, Y113G7C.1, F55H12.5, F20H11.4, C34D4.2, C17H12.3, C17H12.5, Y80D3A.8, Y39B6A.30, F26B1.5, C27B7.6, M05B5.1, C15H7.3, T16G12.7, Y22D7AR.12, C48B6.4, Y39B6A.18, GSP-3, C33H5.16, GSP-4, CDC-25.4, Y69E1A.4, R08A2.2, T28F4.3, K09F6…	762	173	6686	3.601	6.31407e-21	6.31407e-21	2.16025e-20
GOTERM_MF_5	GO:0016791~phosphatase activity	79	3.19192	9.1197e-23	R06B10.1, Y71G12B.30, F38H4.4, ZK484.7, IPP-5, W03F11.4, C06A1.3, F23B12.1, T22C1.8, Y116A8C.37, F52H3.6, C50F2.5, ZK809.1, Y62E10A.13, W01B6.6, Y57G11C.6, F36H1.3, T20B6.1, C07E3.4, F42C5.5, Y113G7C.1, F55H12.5, F20H11.4, C34D4.2, C17H12.3, C17H12.5, Y105C5B.3, Y80D3A.8, Y105C5B.15, Y39B6A.30, F26B1.5, C27B7.6, M05B5.1, C15H7.3, T16G12.7, Y22D7AR.12, C48B6.4, Y39B6A.18, GSP-3, C33H5.16, F26C11.1…	540	225	4951	3.21917	1.09436e-20	5.47182e-21	1.04688e-19
GOTERM_BP_FAT	GO:0006470~protein amino acid dephosphorylation	53	2.14141	2.3135e-22	R06B10.1, F38H4.4, ZK484.7, W03F11.4, T22C1.8, Y116A8C.37, C50F2.5, ZK809.1, Y57G11C.6, W01B6.6, F36H1.3, T20B6.1, C07E3.4, F42C5.5, F55H12.5, Y113G7C.1, F20H11.4, C17H12.3, C17H12.5, Y80D3A.8, Y39B6A.30, C15H7.3, M05B5.1, C48B6.4, Y22D7AR.12, Y39B6A.18, C33H5.16, CDC-25.4, K09F6.3, T28F4.3, C46A5.1, T04F3.3, Y54F10BM.3, F35C11.2, C43E11.5, F40G12.10, Y69A2AR.19, B0207.1, ZK354.8, F54F12.1, Y48G1…	727	125	7838	4.57127	1.84155e-19	4.60387e-20	3.5489e-19
GOTERM_MF_FAT	GO:0004674~protein serine/threonine kinase activity	117	4.72727	7.98794e-22	K06H7.8, VY10G11R.1, CKK-1, C18H7.4, ZK666.8, F26A1.3, TAG-191, CDK-4, R10D12.10, F01D4.3, C03C10.2, C14A4.13, W06F12.3, C27D8.1, CDK-2, F54H5.2, W03F8.2, F26E4.5, ZK596.2, C09B9.4, ZC581.7, F57B9.8, OLD-1, W05H12.1, R13H9.5, ZC581.2, M7.7, F26A1.4, KIN-21, KIN-24, F22B3.8, C27D6.11, T19D12.5, K04C1.5, B0207.7, C56C10.6, Y47G6A.13, Y69E1A.3, H05L14.1, KIN-9, F21F3.2, KIN-5, ODR-1, T06C10.3, NEKL-…	762	418	6686	2.45596	3.26707e-19	1.63353e-19	1.11777e-18
GOTERM_MF_4	GO:0042578~phosphoric ester hydrolase activity	82	3.31313	1.466e-21	R06B10.1, Y71G12B.30, F38H4.4, ZK484.7, IPP-5, W03F11.4, C06A1.3, F23B12.1, T22C1.8, Y116A8C.37, F52H3.6, C50F2.5, ZK809.1, Y62E10A.13, W01B6.6, Y57G11C.6, F36H1.3, T20B6.1, C07E3.4, F42C5.5, Y113G7C.1, F55H12.5, F20H11.4, C34D4.2, C17H12.3, C17H12.5, Y105C5B.3, Y80D3A.8, Y105C5B.15, Y39B6A.30, F26B1.5, ASM-2, C27B7.6, ZC155.4, M05B5.1, C15H7.3, T16G12.7, Y22D7AR.12, C48B6.4, Y39B6A.18, GSP-3, C3…	643	256	6132	3.05468	1.55396e-19	1.55396e-19	1.64501e-18
GOTERM_BP_5	GO:0044267~cellular protein metabolic process	196	7.91919	1.76318e-21	VY10G11R.1, CKK-1, TAG-191, R10D12.10, ZK484.7, C14A4.13, C27D8.1, SKR-15, F54H5.2, T22C1.8, FBXB-54, C09B9.4, C07E3.4, F57B9.8, F42C5.5, OLD-1, F55H12.5, M7.7, KIN-21, KIN-24, C27D6.11, F55D12.6, T19D12.5, K04C1.5, B0207.7, C56C10.6, C33H5.16, TTLL-15, K09F6.3, C46A5.1, T04F3.3, Y54F10BM.3, F21F3.2, Y69A2AR.19, B0207.1, ODR-1, NEKL-4, Y65B4A.9, NEKL-1, R155.3, F39F10.3, F33D11.7, F55F8.7, C50F4.…	606	1167	6749	1.87048	7.33481e-19	2.44494e-19	2.47332e-18
GOTERM_BP_5	GO:0016311~dephosphorylation	53	2.14141	1.83392e-21	R06B10.1, F38H4.4, ZK484.7, W03F11.4, T22C1.8, Y116A8C.37, C50F2.5, ZK809.1, Y57G11C.6, W01B6.6, F36H1.3, T20B6.1, C07E3.4, F42C5.5, F55H12.5, Y113G7C.1, F20H11.4, C17H12.3, C17H12.5, Y80D3A.8, Y39B6A.30, C15H7.3, M05B5.1, C48B6.4, Y22D7AR.12, Y39B6A.18, C33H5.16, CDC-25.4, K09F6.3, T28F4.3, C46A5.1, T04F3.3, Y54F10BM.3, F35C11.2, C43E11.5, F40G12.10, Y69A2AR.19, B0207.1, ZK354.8, F54F12.1, Y48G1…	606	134	6749	4.40492	7.6291e-19	1.90727e-19	2.57255e-18
GOTERM_MF_FAT	GO:0016791~phosphatase activity	79	3.19192	3.68824e-21	R06B10.1, Y71G12B.30, F38H4.4, ZK484.7, IPP-5, W03F11.4, C06A1.3, F23B12.1, T22C1.8, Y116A8C.37, F52H3.6, C50F2.5, ZK809.1, Y62E10A.13, W01B6.6, Y57G11C.6, F36H1.3, T20B6.1, C07E3.4, F42C5.5, Y113G7C.1, F55H12.5, F20H11.4, C34D4.2, C17H12.3, C17H12.5, Y105C5B.3, Y80D3A.8, Y105C5B.15, Y39B6A.30, F26B1.5, C27B7.6, M05B5.1, C15H7.3, T16G12.7, Y22D7AR.12, C48B6.4, Y39B6A.18, GSP-3, C33H5.16, F26C11.1…	762	225	6686	3.08075	1.50849e-18	5.0283e-19	5.16103e-18
GOTERM_MF_FAT	GO:0004672~protein kinase activity	121	4.88889	3.70222e-21	K06H7.8, VY10G11R.1, CKK-1, C18H7.4, ZK666.8, F26A1.3, TAG-191, CDK-4, R10D12.10, F01D4.3, C03C10.2, C14A4.13, W06F12.3, C27D8.1, CDK-2, F54H5.2, W03F8.2, F26E4.5, ZK596.2, C09B9.4, ZC581.7, F57B9.8, OLD-1, W05H12.1, R13H9.5, ZC581.2, M7.7, F26A1.4, KIN-21, KIN-24, F22B3.8, C27D6.11, T19D12.5, K04C1.5, B0207.7, C56C10.6, Y47G6A.13, Y69E1A.3, H05L14.1, KIN-9, F21F3.2, KIN-5, ODR-1, T06C10.3, NEKL-…	762	448	6686	2.36984	1.51421e-18	3.78552e-19	5.1806e-18
GOTERM_MF_4	GO:0016773~phosphotransferase activity, alcohol group as acceptor	124	5.0101	6.47069e-21	K06H7.8, VY10G11R.1, CKK-1, C18H7.4, ZK666.8, F26A1.3, TAG-191, CDK-4, R10D12.10, F01D4.3, C03C10.2, C14A4.13, W06F12.3, C27D8.1, CDK-2, F54H5.2, W03F8.2, F26E4.5, ZK596.2, CKB-3, C09B9.4, ZC581.7, F57B9.8, OLD-1, W05H12.1, R13H9.5, ZC581.2, M7.7, F26A1.4, KIN-21, KIN-24, F22B3.8, C27D6.11, T19D12.5, K04C1.5, B0207.7, C56C10.6, Y47G6A.13, Y69E1A.3, H05L14.1, R10H10.6, KIN-9, F21F3.2, KIN-5, ODR-1…	643	510	6132	2.31869	6.85893e-19	3.42947e-19	7.26077e-18
GOTERM_BP_FAT	GO:0016311~dephosphorylation	53	2.14141	1.01082e-20	R06B10.1, F38H4.4, ZK484.7, W03F11.4, T22C1.8, Y116A8C.37, C50F2.5, ZK809.1, Y57G11C.6, W01B6.6, F36H1.3, T20B6.1, C07E3.4, F42C5.5, F55H12.5, Y113G7C.1, F20H11.4, C17H12.3, C17H12.5, Y80D3A.8, Y39B6A.30, C15H7.3, M05B5.1, C48B6.4, Y22D7AR.12, Y39B6A.18, C33H5.16, CDC-25.4, K09F6.3, T28F4.3, C46A5.1, T04F3.3, Y54F10BM.3, F35C11.2, C43E11.5, F40G12.10, Y69A2AR.19, B0207.1, ZK354.8, F54F12.1, Y48G1…	727	134	7838	4.26424	8.04616e-18	1.60923e-18	1.5506e-17
GOTERM_MF_FAT	GO:0004725~protein tyrosine phosphatase activity	53	2.14141	3.96602e-20	R06B10.1, F38H4.4, ZK484.7, W03F11.4, T22C1.8, Y116A8C.37, C50F2.5, ZK809.1, Y57G11C.6, W01B6.6, F36H1.3, T20B6.1, C07E3.4, F42C5.5, F55H12.5, Y113G7C.1, F20H11.4, C17H12.3, C17H12.5, Y80D3A.8, Y39B6A.30, C15H7.3, M05B5.1, C48B6.4, Y22D7AR.12, Y39B6A.18, C33H5.16, CDC-25.4, K09F6.3, T28F4.3, C46A5.1, T04F3.3, Y54F10BM.3, F35C11.2, C43E11.5, F40G12.10, Y69A2AR.19, B0207.1, ZK354.8, F54F12.1, Y48G1…	762	116	6686	4.00894	1.6221e-17	3.2442e-18	5.54974e-17
GOTERM_MF_4	GO:0016301~kinase activity	127	5.13131	2.15837e-19	K06H7.8, VY10G11R.1, CKK-1, C18H7.4, ZK666.8, F26A1.3, TAG-191, CDK-4, R10D12.10, F01D4.3, THK-1, C03C10.2, C14A4.13, W06F12.3, C27D8.1, CDK-2, F54H5.2, W03F8.2, F26E4.5, ZK596.2, CKB-3, C09B9.4, ZC581.7, F57B9.8, OLD-1, W05H12.1, R13H9.5, ZC581.2, M7.7, D1044.1, F26A1.4, KIN-21, KIN-24, F22B3.8, C27D6.11, T19D12.5, K04C1.5, B0207.7, C56C10.6, Y47G6A.13, Y69E1A.3, H05L14.1, R10H10.6, KIN-9, F21F3…	643	550	6132	2.20208	2.28787e-17	7.62625e-18	2.42191e-16
GOTERM_MF_3	GO:0016772~transferase activity, transferring phosphorus-containing groups	133	5.37374	2.50093e-19	K06H7.8, VY10G11R.1, CKK-1, C18H7.4, ZK666.8, F26A1.3, TAG-191, CDK-4, R10D12.10, F01D4.3, THK-1, C03C10.2, C14A4.13, W06F12.3, C27D8.1, CDK-2, F54H5.2, W03F8.2, F26E4.5, ZK596.2, CKB-3, C09B9.4, ZC581.7, F57B9.8, OLD-1, W05H12.1, R13H9.5, ZC581.2, M7.7, D1044.1, F26A1.4, KIN-21, KIN-24, F22B3.8, C27D6.11, T19D12.5, K04C1.5, B0207.7, C56C10.6, Y47G6A.13, Y69E1A.3, H05L14.1, R10H10.6, KIN-9, F21F3…	695	639	7243	2.16912	2.17581e-17	2.17581e-17	2.7029e-16
INTERPRO	IPR000387:Dual-specific/protein-tyrosine phosphatase, conserved region	43	1.73737	2.91143e-19	R06B10.1, F38H4.4, C15H7.3, M05B5.1, Y22D7AR.12, Y39B6A.18, C33H5.16, ZK484.7, W03F11.4, K09F6.3, T28F4.3, C46A5.1, T04F3.3, F35C11.2, Y54F10BM.3, T22C1.8, F40G12.10, Y69A2AR.19, B0207.1, ZK809.1, Y57G11C.6, W01B6.6, ZK354.8, F36H1.3, F54F12.1, Y48G1C.5, C24D10.1, Y113G7C.1, H06I04.5, R155.3, Y48G9A.9, F47B3.7, F55F8.7, F20H11.4, C17H12.3, C17H12.5, Y80D3A.8, K07F5.6, T27A3.5, F25H5.7, Y39B6A.30,…	1438	86	13633	4.74026	2.5213e-16	6.30325e-17	4.51559e-16
GOTERM_BP_4	GO:0044267~cellular protein metabolic process	196	7.91919	5.15178e-19	VY10G11R.1, CKK-1, TAG-191, R10D12.10, ZK484.7, C14A4.13, C27D8.1, SKR-15, F54H5.2, T22C1.8, FBXB-54, C09B9.4, C07E3.4, F57B9.8, F42C5.5, OLD-1, F55H12.5, M7.7, KIN-21, KIN-24, C27D6.11, F55D12.6, T19D12.5, K04C1.5, B0207.7, C56C10.6, C33H5.16, TTLL-15, K09F6.3, C46A5.1, T04F3.3, Y54F10BM.3, F21F3.2, Y69A2AR.19, B0207.1, ODR-1, NEKL-4, Y65B4A.9, NEKL-1, R155.3, F39F10.3, F33D11.7, F55F8.7, C50F4.…	714	1167	7683	1.80725	2.1792e-16	7.264e-17	7.24417e-16
GOTERM_BP_4	GO:0019538~protein metabolic process	238	9.61616	7.19464e-19	VY10G11R.1, CKK-1, Y71H2AM.25, TAG-191, R10D12.10, ZK484.7, DPF-2, Y19D10B.6, C14A4.13, C27D8.1, F54H5.2, SKR-15, T22C1.8, FBXB-54, C09B9.4, C07E3.4, F57B9.8, F42C5.5, F55H12.5, OLD-1, NAS-37, NAS-38, M7.7, KIN-21, KIN-24, NAS-31, C27D6.11, F55D12.6, T19D12.5, K04C1.5, B0207.7, C56C10.6, C08F11.7, NAS-25, T19D2.1, C33H5.16, TTLL-15, K09F6.3, C46A5.1, C08H9.1, F28E10.5, T04F3.3, Y54F10BM.3, QUA-1,…	714	1536	7683	1.66732	3.04333e-16	7.60834e-17	1.01167e-15
GOTERM_BP_3	GO:0019538~protein metabolic process	238	9.61616	1.02523e-18	VY10G11R.1, CKK-1, Y71H2AM.25, TAG-191, R10D12.10, ZK484.7, DPF-2, Y19D10B.6, C14A4.13, C27D8.1, F54H5.2, SKR-15, T22C1.8, FBXB-54, C09B9.4, C07E3.4, F57B9.8, F42C5.5, F55H12.5, OLD-1, NAS-37, NAS-38, M7.7, KIN-21, KIN-24, NAS-31, C27D6.11, F55D12.6, T19D12.5, K04C1.5, B0207.7, C56C10.6, C08F11.7, NAS-25, T19D2.1, C33H5.16, TTLL-15, K09F6.3, C46A5.1, C08H9.1, F28E10.5, T04F3.3, Y54F10BM.3, QUA-1,…	735	1536	7908	1.66711	2.99367e-16	1.49684e-16	1.36437e-15
GOTERM_CC_3	GO:0031224~intrinsic to membrane	789	31.8788	1.71225e-18	Y37H2A.14, T24C4.4, F56A11.6, SPRR-1, F32B4.2, GTL-2, DPF-2, T05E12.3, C38D9.5, M153.2, C09B9.7, W01D2.3, C09B9.2, JPH-1, NAS-37, M03E7.3, Y69A2AR.23, GLT-3, GLT-6, F41C3.11, R105.1, NAS-25, F48C1.9, K09F6.3, CNC-10, Y32G9A.2, Y69A2AR.14, Y69A2AR.19, T12G3.4, W05H7.2, C54D2.2, F54E4.2, Y37A1A.2, B0281.4, T06F4.1, B0281.6, F45E10.2, ZK512.1, Y37D8A.5, T11F9.10, W04E12.5, W04E12.4, T10E9.4, Y37D8A.…	968	6608	9458	1.16662	1.60952e-16	1.60952e-16	1.87832e-15
GOTERM_CC_2	GO:0044425~membrane part	800	32.3232	5.64796e-18	Y37H2A.14, T24C4.4, F56A11.6, SPRR-1, F32B4.2, GTL-2, DPF-2, T05E12.3, C38D9.5, M153.2, C09B9.7, W01D2.3, C09B9.2, JPH-1, NAS-37, M03E7.3, Y69A2AR.23, GLT-3, GLT-6, F41C3.11, R105.1, NAS-25, F48C1.9, K09F6.3, CNC-10, Y32G9A.2, Y69A2AR.14, Y69A2AR.19, T12G3.4, W05H7.2, C54D2.2, F54E4.2, Y37A1A.2, B0281.4, T06F4.1, B0281.6, F45E10.2, ZK512.1, Y37D8A.5, T11F9.10, W04E12.5, T10E9.4, W04E12.4, Y37D8A.…	968	6752	9458	1.15766	1.86383e-16	1.86383e-16	4.92983e-15
GOTERM_CC_3	GO:0044425~membrane part	800	32.3232	5.64796e-18	Y37H2A.14, T24C4.4, F56A11.6, SPRR-1, F32B4.2, GTL-2, DPF-2, T05E12.3, C38D9.5, M153.2, C09B9.7, W01D2.3, C09B9.2, JPH-1, NAS-37, M03E7.3, Y69A2AR.23, GLT-3, GLT-6, F41C3.11, R105.1, NAS-25, F48C1.9, K09F6.3, CNC-10, Y32G9A.2, Y69A2AR.14, Y69A2AR.19, T12G3.4, W05H7.2, C54D2.2, F54E4.2, Y37A1A.2, B0281.4, T06F4.1, B0281.6, F45E10.2, ZK512.1, Y37D8A.5, T11F9.10, W04E12.5, T10E9.4, W04E12.4, Y37D8A.…	968	6752	9458	1.15766	5.30908e-16	2.65454e-16	6.19574e-15
INTERPRO	IPR000535:Major sperm protein	39	1.57576	9.30556e-18	F38H4.6, MSP-31, Y48B6A.5, MSP-33, Y53C10A.15, MSP-36, MSP-38, MSP-113, C15H11.1, MSP-3, C10H11.7, C35E7.9, SSP-11, SSP-10, F13A7.1, MSP-40, MSP-152, T22B3.3, SSP-16, W03D8.5, Y53F4B.19, C34D4.3, F21H7.5, MSP-142, F42A9.7, C14A4.8, MSP-56, MSP-57, ZK1307.4, MSP-59, F36D3.4, MSP-53, MSP-19, MSP-55, DCT-9, F58A6.9, MSP-10, ZK546.3, F36H12.3, MSP-64, MSP-63, MSP-65, F52F12.8, ZK354.7, MSP-45, F58E6.…	1438	77	13633	4.80183	8.05861e-15	1.61172e-15	1.44328e-14
INTERPRO	IPR008962:PapD-like	37	1.49495	1.20565e-17	F38H4.6, MSP-31, Y48B6A.5, MSP-33, Y53C10A.15, MSP-36, MSP-38, MSP-113, C15H11.1, MSP-3, C10H11.7, C35E7.9, SSP-11, SSP-10, F13A7.1, MSP-40, MSP-152, T22B3.3, SSP-16, W03D8.5, C34D4.3, F21H7.5, MSP-142, F42A9.7, MSP-56, MSP-57, ZK1307.4, MSP-59, F36D3.4, MSP-53, MSP-19, MSP-55, DCT-9, F58A6.9, MSP-10, ZK546.3, F36H12.3, MSP-64, MSP-63, MSP-65, Y41C4A.7, F52F12.8, ZK354.7, MSP-45, F58E6.5, T05D4.5…	1438	70	13633	5.01114	1.04409e-14	1.74015e-15	1.86994e-14
GOTERM_MF_3	GO:0016788~hydrolase activity, acting on ester bonds	105	4.24242	1.22604e-17	R06B10.1, CRN-5, ZK484.7, C31H1.5, F23B12.1, T22C1.8, F44B9.10, ZK809.1, Y62E10A.13, D2021.4, SUL-2, C07E3.4, F42C5.5, F55H12.5, F20H11.4, C34D4.2, PAF-1, Y80D3A.8, SUL-3, ZK262.3, Y105C5B.15, Y39B6A.30, F26B1.5, Y66A7A.2, ASM-2, K11E4.1, T16G12.7, GSP-3, C33H5.16, CDC-25.4, GSP-4, R08A2.2, Y69E1A.4, K09F6.3, F49E11.7, C46A5.1, T04F3.3, F35C11.2, Y54F10BM.3, C43E11.5, Y69A2AR.19, B0207.1, Y48G1C.…	695	467	7243	2.34318	1.06666e-15	5.33328e-16	1.32506e-14
INTERPRO	IPR000980:SH2 motif	34	1.37374	1.64339e-15	R11E3.1, C35E7.10, KIN-26, C18H7.4, Y4C6A.1, F01D4.3, C25A8.5, Y69E1A.3, Y52D5A.2, C55C3.4, W03F8.2, F26E4.5, Y116A8C.38, KIN-5, B0207.11, T08G11.2, FRK-1, K09B11.5, T06C10.3, W01B6.5, ZC581.7, F57B9.8, T25B9.4, T25B9.5, ZK622.1, C34F11.5, SPE-8, KIN-21, KIN-24, F59A3.8, F22B3.8, Y116A8C.24, T21G5.1, Y43C5B.2	1438	67	13633	4.81101	1.44218e-12	2.06057e-13	2.58682e-12
GOTERM_CC_2	GO:0016020~membrane	806	32.5657	4.06672e-15	Y37H2A.14, T24C4.4, F56A11.6, SPRR-1, F32B4.2, GTL-2, DPF-2, T05E12.3, C38D9.5, M153.2, C09B9.7, W01D2.3, C09B9.2, JPH-1, NAS-37, M03E7.3, Y69A2AR.23, GLT-3, GLT-6, F41C3.11, R105.1, NAS-25, F48C1.9, K09F6.3, CNC-10, Y32G9A.2, Y69A2AR.14, Y69A2AR.19, T12G3.4, W05H7.2, C54D2.2, F54E4.2, Y37A1A.2, B0281.4, T06F4.1, B0281.6, F45E10.2, ZK512.1, Y37D8A.5, T11F9.10, W04E12.5, T10E9.4, W04E12.4, Y37D8A.…	968	6918	9458	1.13836	1.35558e-13	6.77236e-14	3.58602e-12
GOTERM_CC_3	GO:0016020~membrane	806	32.5657	4.06672e-15	Y37H2A.14, T24C4.4, F56A11.6, SPRR-1, F32B4.2, GTL-2, DPF-2, T05E12.3, C38D9.5, M153.2, C09B9.7, W01D2.3, C09B9.2, JPH-1, NAS-37, M03E7.3, Y69A2AR.23, GLT-3, GLT-6, F41C3.11, R105.1, NAS-25, F48C1.9, K09F6.3, CNC-10, Y32G9A.2, Y69A2AR.14, Y69A2AR.19, T12G3.4, W05H7.2, C54D2.2, F54E4.2, Y37A1A.2, B0281.4, T06F4.1, B0281.6, F45E10.2, ZK512.1, Y37D8A.5, T11F9.10, W04E12.5, T10E9.4, W04E12.4, Y37D8A.…	968	6918	9458	1.13836	3.86136e-13	1.28675e-13	4.50751e-12
GOTERM_CC_5	GO:0016021~integral to membrane	789	31.8788	8.72819e-15	Y37H2A.14, T24C4.4, F56A11.6, SPRR-1, F32B4.2, GTL-2, DPF-2, T05E12.3, C38D9.5, M153.2, C09B9.7, W01D2.3, C09B9.2, JPH-1, NAS-37, M03E7.3, Y69A2AR.23, GLT-3, GLT-6, F41C3.11, R105.1, NAS-25, F48C1.9, K09F6.3, CNC-10, Y32G9A.2, Y69A2AR.14, Y69A2AR.19, T12G3.4, W05H7.2, C54D2.2, F54E4.2, Y37A1A.2, B0281.4, T06F4.1, B0281.6, F45E10.2, ZK512.1, Y37D8A.5, T11F9.10, W04E12.5, W04E12.4, T10E9.4, Y37D8A.…	930	6596	8803	1.13225	1.22791e-12	1.22791e-12	1.03473e-11
GOTERM_CC_4	GO:0016021~integral to membrane	789	31.8788	1.37385e-14	Y37H2A.14, T24C4.4, F56A11.6, SPRR-1, F32B4.2, GTL-2, DPF-2, T05E12.3, C38D9.5, M153.2, C09B9.7, W01D2.3, C09B9.2, JPH-1, NAS-37, M03E7.3, Y69A2AR.23, GLT-3, GLT-6, F41C3.11, R105.1, NAS-25, F48C1.9, K09F6.3, CNC-10, Y32G9A.2, Y69A2AR.14, Y69A2AR.19, T12G3.4, W05H7.2, C54D2.2, F54E4.2, Y37A1A.2, B0281.4, T06F4.1, B0281.6, F45E10.2, ZK512.1, Y37D8A.5, T11F9.10, W04E12.5, W04E12.4, T10E9.4, Y37D8A.…	933	6596	8829	1.13195	1.88605e-12	1.88605e-12	1.61871e-11
SMART	SM00252:SH2	34	1.37374	1.62886e-14	R11E3.1, C35E7.10, KIN-26, C18H7.4, Y4C6A.1, F01D4.3, C25A8.5, Y69E1A.3, Y52D5A.2, C55C3.4, W03F8.2, F26E4.5, Y116A8C.38, KIN-5, B0207.11, T08G11.2, FRK-1, K09B11.5, T06C10.3, W01B6.5, ZC581.7, F57B9.8, T25B9.4, T25B9.5, ZK622.1, C34F11.5, SPE-8, KIN-21, KIN-24, F59A3.8, F22B3.8, Y116A8C.24, T21G5.1, Y43C5B.2	640	67	5537	4.39035	2.98661e-12	9.95537e-13	2.01617e-11
GOTERM_CC_5	GO:0031224~intrinsic to membrane	789	31.8788	1.83494e-14	Y37H2A.14, T24C4.4, F56A11.6, SPRR-1, F32B4.2, GTL-2, DPF-2, T05E12.3, C38D9.5, M153.2, C09B9.7, W01D2.3, C09B9.2, JPH-1, NAS-37, M03E7.3, Y69A2AR.23, GLT-3, GLT-6, F41C3.11, R105.1, NAS-25, F48C1.9, K09F6.3, CNC-10, Y32G9A.2, Y69A2AR.14, Y69A2AR.19, T12G3.4, W05H7.2, C54D2.2, F54E4.2, Y37A1A.2, B0281.4, T06F4.1, B0281.6, F45E10.2, ZK512.1, Y37D8A.5, T11F9.10, W04E12.5, W04E12.4, T10E9.4, Y37D8A.…	930	6608	8803	1.1302	2.56462e-12	1.28231e-12	2.1616e-11
INTERPRO	IPR017441:Protein kinase, ATP binding site	74	2.9899	2.05505e-14	K06H7.8, VY10G11R.1, C35E7.10, CKK-1, Y69F12A.1, C05C12.1, C18H7.4, ZK666.8, CDK-4, Y73B6A.1, F01D4.3, C25A8.5, C03C10.2, C14A4.13, W06F12.3, C27D8.1, CDK-2, W02B12.12, W03F8.2, B0218.5, TAG-344, F26E4.5, ZK596.2, Y116A8C.38, FRK-1, F38E1.3, K09B11.5, W01B6.5, ZC581.7, F57B9.8, OLD-1, ZC581.2, C34F11.5, KIN-21, F59A3.8, Y38H8A.4, F53C3.1, Y38H8A.3, F22B3.8, Y116A8C.24, C27D6.11, Y43C5B.2, PRK-2, …	1438	272	13633	2.57926	1.77869e-11	2.22333e-12	3.18523e-11
GOTERM_CC_4	GO:0031224~intrinsic to membrane	789	31.8788	2.86717e-14	Y37H2A.14, T24C4.4, F56A11.6, SPRR-1, F32B4.2, GTL-2, DPF-2, T05E12.3, C38D9.5, M153.2, C09B9.7, W01D2.3, C09B9.2, JPH-1, NAS-37, M03E7.3, Y69A2AR.23, GLT-3, GLT-6, F41C3.11, R105.1, NAS-25, F48C1.9, K09F6.3, CNC-10, Y32G9A.2, Y69A2AR.14, Y69A2AR.19, T12G3.4, W05H7.2, C54D2.2, F54E4.2, Y37A1A.2, B0281.4, T06F4.1, B0281.6, F45E10.2, ZK512.1, Y37D8A.5, T11F9.10, W04E12.5, W04E12.4, T10E9.4, Y37D8A.…	933	6608	8829	1.12989	3.92419e-12	1.9621e-12	3.36731e-11
GOTERM_MF_1	GO:0005198~structural molecule activity	104	4.20202	7.7627e-14	Y48B6A.5, Y53C10A.15, COL-161, DPY-4, DPY-5, COL-97, COL-157, C15H11.1, COL-95, COL-156, COL-154, COL-153, MSP-3, COL-91, IFP-1, MSP-152, T22B3.3, COL-13, COL-12, JPH-1, COL-150, Y53F4B.19, COL-145, COL-146, C34D4.3, COL-141, COL-88, F21H7.5, MSP-142, COL-14, F55D12.6, MSP-19, R105.1, COL-182, COL-180, F58A6.9, MSP-10, COL-175, Y57G11A.2, COL-173, Y39F10C.1, MSP-64, MSP-63, MSP-65, F58E6.5, COL-3…	1006	468	9555	2.11067	7.76046e-13	7.76046e-13	4.65961e-11
GOTERM_CC_4	GO:0044425~membrane part	800	32.3232	1.00851e-13	Y37H2A.14, T24C4.4, F56A11.6, SPRR-1, F32B4.2, GTL-2, DPF-2, T05E12.3, C38D9.5, M153.2, C09B9.7, W01D2.3, C09B9.2, JPH-1, NAS-37, M03E7.3, Y69A2AR.23, GLT-3, GLT-6, F41C3.11, R105.1, NAS-25, F48C1.9, K09F6.3, CNC-10, Y32G9A.2, Y69A2AR.14, Y69A2AR.19, T12G3.4, W05H7.2, C54D2.2, F54E4.2, Y37A1A.2, B0281.4, T06F4.1, B0281.6, F45E10.2, ZK512.1, Y37D8A.5, T11F9.10, W04E12.5, T10E9.4, W04E12.4, Y37D8A.…	933	6752	8829	1.12121	1.38107e-11	4.60354e-12	1.18494e-10
GOTERM_MF_2	GO:0042302~structural constituent of cuticle	49	1.9798	2.43845e-13	COL-58, COL-161, COL-182, DPY-4, DPY-5, COL-180, COL-139, COL-97, COL-175, COL-71, COL-157, COL-95, COL-137, COL-156, COL-138, COL-173, COL-154, COL-153, COL-79, COL-111, COL-130, COL-77, COL-91, COL-73, COL-13, COL-49, COL-12, COL-34, BLI-2, COL-150, COL-186, BLI-1, COL-145, COL-162, COL-109, COL-146, COL-60, COL-129, COL-88, COL-141, ROL-1, COL-38, COL-68, COL-61, COL-43, COL-14, COL-63, COL-12…	887	155	8884	3.16628	1.14588e-11	1.14588e-11	2.3157e-10
INTERPRO	IPR002486:Nematode cuticle collagen, N-terminal	49	1.9798	2.63319e-13	COL-58, COL-161, COL-182, DPY-4, DPY-5, COL-180, COL-139, COL-97, COL-175, COL-71, COL-157, COL-95, COL-137, COL-156, COL-138, COL-173, COL-154, COL-153, COL-79, COL-111, COL-130, COL-77, COL-91, COL-73, COL-13, COL-49, COL-12, COL-34, BLI-2, COL-150, COL-186, BLI-1, COL-145, COL-162, COL-109, COL-146, COL-60, COL-129, COL-88, COL-141, ROL-1, COL-38, COL-68, COL-61, COL-43, COL-14, COL-63, COL-12…	1438	147	13633	3.16018	2.28057e-10	2.53396e-11	4.0844e-10
GOTERM_MF_FAT	GO:0004713~protein tyrosine kinase activity	88	3.55556	3.43997e-13	K06H7.8, C35E7.10, CKK-1, Y69F12A.1, C18H7.4, ZK666.8, TAG-191, CDK-4, T05C12.1, F01D4.3, R02C2.1, C25A8.5, C14A4.13, W06F12.3, C27D8.1, CDK-2, F54H5.2, W02B12.12, W03F8.2, TAG-344, F26E4.5, ZK596.2, Y116A8C.38, FRK-1, F38E1.3, GSKA-3, K09B11.5, W01B6.2, F35C11.3, W01B6.5, Y39G8B.5, ZC581.7, F57B9.8, OLD-1, M05D6.1, R13H9.5, C34F11.5, GCY-11, Y48G1BM.6, KIN-21, F59A3.8, Y38H8A.4, KIN-24, F53C3.1,…	762	351	6686	2.19982	1.40674e-10	2.34457e-11	4.81293e-10
INTERPRO	IPR008266:Tyrosine protein kinase, active site	34	1.37374	1.3874e-12	R11E3.1, C35E7.10, KIN-26, C18H7.4, Y4C6A.1, F01D4.3, C25A8.5, Y69E1A.3, Y52D5A.2, C55C3.4, F20D6.5, F26E4.5, KIN-9, KIN-30, Y116A8C.38, KIN-5, FRK-1, K09B11.5, T06C10.3, ZC581.7, F57B9.8, OLD-1, T25B9.4, T25B9.5, ZK622.1, C34F11.5, SPE-8, KIN-21, Y48G1BM.6, KIN-24, F59A3.8, F22B3.8, Y116A8C.24, T21G5.1	1438	81	13633	3.97948	1.20153e-09	1.20153e-10	2.15191e-09
INTERPRO	IPR008160:Collagen triple helix repeat	54	2.18182	2.58529e-12	COL-58, COL-161, DPY-4, DPY-5, COL-97, COL-157, COL-156, COL-95, COL-154, COL-153, COL-111, COL-91, COL-13, COL-12, COL-49, BLI-2, COL-150, COL-186, BLI-1, COL-145, COL-109, COL-146, COL-141, COL-104, COL-88, COL-14, COL-43, COL-81, COL-182, COL-180, COL-139, COL-71, COL-175, COL-137, COL-173, COL-138, COL-179, COL-177, COL-79, COL-130, COL-77, COL-73, COL-34, COL-162, COL-129, COL-60, ROL-1, COL…	1438	182	13633	2.8129	2.23884e-09	2.03531e-10	4.00971e-09
INTERPRO	IPR000387:Protein-tyrosine phosphatase	27	1.09091	5.42552e-12	R06B10.1, M05B5.1, Y22D7AR.12, C33H5.16, ZK484.7, W03F11.4, C46A5.1, Y54F10BM.3, F35C11.2, Y69A2AR.19, B0207.1, ZK809.1, Y57G11C.6, ZK354.8, Y48G1C.5, C24D10.1, R155.3, F47B3.7, Y48G9A.9, F55F8.7, F20H11.4, C17H12.3, C17H12.5, K07F5.6, T27A3.5, PPH-2, F36H12.10	1438	55	13633	4.65408	4.69853e-09	3.91544e-10	8.41495e-09
GOTERM_MF_FAT	GO:0005198~structural molecule activity	104	4.20202	6.08967e-12	Y48B6A.5, Y53C10A.15, COL-161, DPY-4, DPY-5, COL-97, COL-157, C15H11.1, COL-95, COL-156, COL-154, COL-153, MSP-3, COL-91, IFP-1, MSP-152, T22B3.3, COL-13, COL-12, JPH-1, COL-150, Y53F4B.19, COL-145, COL-146, C34D4.3, COL-141, COL-88, F21H7.5, MSP-142, COL-14, F55D12.6, MSP-19, R105.1, COL-182, COL-180, F58A6.9, MSP-10, COL-175, Y57G11A.2, COL-173, Y39F10C.1, MSP-64, MSP-63, MSP-65, F58E6.5, COL-3…	762	468	6686	1.94984	2.49068e-09	3.55812e-10	8.52143e-09
INTERPRO	IPR001245:Tyrosine protein kinase	40	1.61616	1.2144e-11	R11E3.1, C35E7.10, KIN-26, C18H7.4, Y4C6A.1, F01D4.3, Y69E1A.3, C25A8.5, Y52D5A.2, C14A4.13, C55C3.4, W03F8.2, F26E4.5, KIN-9, KIN-30, Y116A8C.38, ODR-1, KIN-5, FRK-1, C39H7.1, K09B11.5, T06C10.3, W01B6.5, ZC581.7, F57B9.8, OLD-1, GCY-9, T25B9.4, T25B9.5, ZK622.1, C34F11.5, SPE-8, KIN-21, KIN-24, F59A3.8, Y38H8A.3, F22B3.8, Y116A8C.24, T21G5.1, Y43C5B.2	1438	115	13633	3.29758	1.05167e-08	8.08974e-10	1.88351e-08
INTERPRO	IPR006186:Serine/threonine-specific protein phosphatase and bis(5-nucleosyl)-tetraphosphatase	25	1.0101	1.36817e-11	C27B7.6, Y71G12B.30, T16G12.7, R08C7.8, ZC477.2, GSP-3, GSP-4, C06A1.3, Y69E1A.4, R08A2.2, F49E11.7, F23B12.1, R03D7.8, F52H3.6, F20D6.6, Y40H4A.2, ZC477.10, F58G1.3, F42G8.8, ZK938.1, F44B9.9, C47A4.3, C34D4.2, F26B1.5, R13A5.11	1438	49	13633	4.837	1.18484e-08	8.46312e-10	2.12202e-08
SP_PIR_KEYWORDS	tyrosine-protein kinase	33	1.33333	1.56162e-11	R11E3.1, C35E7.10, KIN-26, C18H7.4, Y4C6A.1, F01D4.3, C25A8.5, Y69E1A.3, Y52D5A.2, C55C3.4, W03F8.2, F26E4.5, Y116A8C.38, KIN-5, FRK-1, K09B11.5, T06C10.3, W01B6.5, ZC581.7, F57B9.8, OLD-1, T25B9.4, T25B9.5, ZK622.1, SPE-8, C34F11.5, KIN-21, KIN-24, F59A3.8, F22B3.8, Y116A8C.24, T21G5.1, Y43C5B.2	2404	73	19674	3.69955	3.51364e-09	3.51364e-09	1.99503e-08
GOTERM_MF_FAT	GO:0042302~structural constituent of cuticle	49	1.9798	2.63067e-11	COL-58, COL-161, COL-182, DPY-4, DPY-5, COL-180, COL-139, COL-97, COL-175, COL-71, COL-157, COL-95, COL-137, COL-156, COL-138, COL-173, COL-154, COL-153, COL-79, COL-111, COL-130, COL-77, COL-91, COL-73, COL-13, COL-49, COL-12, COL-34, BLI-2, COL-150, COL-186, BLI-1, COL-145, COL-162, COL-109, COL-146, COL-60, COL-129, COL-88, COL-141, ROL-1, COL-38, COL-68, COL-61, COL-43, COL-14, COL-63, COL-12…	762	155	6686	2.7738	1.07595e-08	1.34493e-09	3.68116e-08
SMART	SM00156:PP2Ac	25	1.0101	7.88175e-11	C27B7.6, Y71G12B.30, T16G12.7, R08C7.8, ZC477.2, GSP-3, GSP-4, C06A1.3, Y69E1A.4, R08A2.2, F49E11.7, F23B12.1, R03D7.8, F52H3.6, F20D6.6, Y40H4A.2, ZC477.10, F58G1.3, F42G8.8, ZK938.1, F44B9.9, C47A4.3, C34D4.2, F26B1.5, R13A5.11	640	49	5537	4.41406	1.44236e-08	3.6059e-09	9.73513e-08
INTERPRO	IPR004843:Metallophosphoesterase	28	1.13131	8.87216e-11	C27B7.6, Y71G12B.30, T16G12.7, R08C7.8, ZC477.2, GSP-3, GSP-4, C06A1.3, R08A2.2, Y69E1A.4, F49E11.7, F23B12.1, F20D6.6, F52H3.6, Y40H4A.2, F58G1.3, F42G8.8, ZK938.1, F44B9.9, C47A4.3, H25K10.1, K07C11.7, C34D4.2, Y105C5B.3, Y105C5B.15, F26B1.5, ASM-2, R13A5.11	1438	65	13633	4.08392	7.68329e-08	5.12219e-09	1.37606e-07
SMART	SM00219:TyrKc	40	1.61616	1.33581e-10	R11E3.1, C35E7.10, KIN-26, C18H7.4, Y4C6A.1, F01D4.3, Y69E1A.3, C25A8.5, Y52D5A.2, C14A4.13, C55C3.4, W03F8.2, F26E4.5, KIN-9, KIN-30, Y116A8C.38, ODR-1, KIN-5, FRK-1, C39H7.1, K09B11.5, T06C10.3, W01B6.5, ZC581.7, F57B9.8, OLD-1, GCY-9, T25B9.4, T25B9.5, ZK622.1, C34F11.5, SPE-8, KIN-21, KIN-24, F59A3.8, Y38H8A.3, F22B3.8, Y116A8C.24, T21G5.1, Y43C5B.2	640	115	5537	3.00924	2.44453e-08	4.88907e-09	1.64992e-07
GOTERM_MF_2	GO:0016740~transferase activity	189	7.63636	5.56261e-10	K06H7.8, VY10G11R.1, CKK-1, Y97E10AR.2, C18H7.4, ZK666.8, F26A1.3, TAG-191, CDK-4, R10D12.10, F01D4.3, THK-1, C03C10.2, C14A4.13, W06F12.3, C27D8.1, F54H5.2, CDK-2, W03F8.2, F26E4.5, ZK596.2, CKB-3, K02E11.6, C09B9.4, ZC581.7, F57B9.8, OLD-1, W05H12.1, R13H9.5, M7.7, ZC581.2, D1044.1, PCM-1, UGT-2, F26A1.4, KIN-21, UGT-54, KIN-24, F22B3.8, C27D6.11, UGT-8, UGT-7, GST-41, T19D12.5, K04C1.5, B0207.…	887	1249	8884	1.5156	2.61443e-08	1.30721e-08	5.28348e-07
INTERPRO	IPR016186:C-type lectin-like	54	2.18182	3.78194e-09	CLEC-210, C49C3.11, CLEC-66, CLEC-260, CLEC-28, CLEC-27, CLEC-123, CLEC-26, CLEC-25, CLEC-60, CLEC-22, CLEC-166, CLEC-198, CLEC-224, CLEC-222, CLEC-119, CLEC-117, CLEC-80, CLEC-7, CLEC-194, CLEC-76, CLEC-4, CLEC-71, CLEC-151, CLEC-36, CLEC-72, CLEC-35, CLEC-73, CLEC-154, CLEC-31, CLEC-153, CLEC-33, CLEC-79, CLEC-149, CLEC-48, CLEC-85, CLEC-184, CLEC-143, CLEC-180, CLEC-41, CLEC-40, CLEC-242, CLEC…	1438	218	13633	2.34839	3.27516e-06	2.04698e-07	5.86574e-06
INTERPRO	IPR016130:Protein-tyrosine phosphatase, active site	24	0.969697	4.33875e-09	ZK354.8, C15H7.3, F36H1.3, F54F12.1, T20B6.1, Y22D7AR.12, Y113G7C.1, C33H5.16, ZK484.7, R155.3, H06I04.5, W03F11.4, T28F4.3, F47B3.7, K09F6.3, Y48G9A.9, F55F8.7, F20H11.4, C17H12.3, T22C1.8, T27A3.5, F25H5.7, B0207.1, F36H12.10	1438	57	13633	3.9918	3.75735e-06	2.21021e-07	6.72934e-06
INTERPRO	IPR001304:C-type lectin	58	2.34343	1.41435e-08	CLEC-210, C49C3.11, CLEC-66, CLEC-260, CLEC-28, CLEC-27, CLEC-123, CLEC-26, CLEC-25, CLEC-60, CLEC-22, CLEC-166, CLEC-198, CLEC-224, CLEC-222, CLEC-119, CLEC-117, CLEC-80, CLEC-7, CLEC-194, CLEC-76, CLEC-4, CLEC-71, CLEC-151, CLEC-36, CLEC-72, CLEC-35, CLEC-73, CLEC-154, CLEC-31, CLEC-153, CLEC-33, CLEC-79, CLEC-149, CLEC-48, CLEC-85, CLEC-184, CLEC-83, CLEC-143, CLEC-180, CLEC-41, CLEC-40, CLEC-…	1438	251	13633	2.19072	1.22482e-05	6.80457e-07	2.19363e-05
GOTERM_MF_1	GO:0003824~catalytic activity	473	19.1111	3.36065e-08	VY10G11R.1, CKK-1, C31H2.4, TAG-191, C31H1.5, Y19D10B.6, CPI-1, DPF-2, C14A4.13, C27D8.1, ABT-5, E04F6.4, F54H5.2, SKR-15, T22C1.8, ABT-1, R07E4.3, Y62E10A.13, C09B9.4, F42C5.5, F57B9.8, NAS-37, W05H12.1, NAS-38, M7.7, PAF-1, KIN-21, UGT-54, KIN-24, NAS-31, Y105C5B.15, C27D6.11, K04C1.5, B0207.7, T16G12.7, ACDH-5, T19D2.1, NAS-25, C33H5.16, GSP-3, GSP-4, K09F6.3, UGT-42, UGT-41, C46A5.1, ACDH-8, …	1006	3726	9555	1.20573	3.36065e-07	1.68033e-07	2.01797e-05
INTERPRO	IPR017442:Serine/threonine protein kinase-related	59	2.38384	4.2892e-08	K06H7.8, CKK-1, Y69F12A.1, C05C12.1, F26A1.3, ZK666.8, TAG-191, CDK-4, T05C12.1, R02C2.1, C03C10.2, W06F12.3, C27D8.1, CDK-2, F54H5.2, W02B12.12, TAG-344, B0218.5, ZK596.2, F38E1.3, W03G9.5, GSKA-3, W01B6.2, F35C11.3, Y39G8B.5, M05D6.1, R13H9.5, M7.7, GCY-11, F53C3.1, Y38H8A.4, C27D6.11, PRK-2, T19D12.5, K04C1.5, B0207.7, C56C10.6, D2045.7, Y47G6A.13, C08F8.6, D2045.5, T15B12.2, F41G3.5, C04G2.2,…	1438	265	13633	2.11076	3.71438e-05	1.95497e-06	6.65249e-05
INTERPRO	IPR009658:Protein of unknown function DUF1248	10	0.40404	7.08561e-08	F22B5.5, F10G2.7, C28D4.7, ZK1248.5, C28D4.8, C28D4.5, C28D4.4, F36D3.8, K08A2.2, T09F5.10	1438	11	13633	8.61866	6.13595e-05	3.06807e-06	0.000109897
GOTERM_MF_3	GO:0001883~purine nucleoside binding	146	5.89899	8.32838e-08	K06H7.8, VY10G11R.1, CKK-1, C18H7.4, ZK666.8, F26A1.3, TAG-191, CDK-4, R10D12.10, F01D4.3, THK-1, C03C10.2, C14A4.13, W06F12.3, C27D8.1, ABT-5, F54H5.2, CDK-2, W03F8.2, ABT-1, F26E4.5, FBXB-54, ZK596.2, HUM-4, CKB-3, C09B9.4, ZC581.7, F57B9.8, OLD-1, R13H9.5, M7.7, ZC581.2, M04C3.1, F26A1.4, KIN-21, KIN-24, F22B3.8, C27D6.11, T19D12.5, K04C1.5, B0207.7, C56C10.6, Y47G6A.13, ACDH-5, Y69E1A.3, H05L…	695	1010	7243	1.50649	7.24567e-06	2.41523e-06	9.00097e-05
PIR_SUPERFAMILY	PIRSF038285:cuticle collagen	26	1.05051	1.37776e-07	COL-58, DPY-4, DPY-5, COL-180, COL-97, COL-175, COL-79, COL-111, COL-77, COL-91, COL-73, COL-13, COL-49, COL-12, COL-34, BLI-2, COL-150, COL-145, COL-60, COL-129, COL-88, COL-104, COL-68, COL-61, COL-14, COL-125	512	73	4541	3.15887	4.71184e-05	4.71184e-05	0.000187786
SMART	SM00034:CLECT	58	2.34343	2.08353e-07	CLEC-210, C49C3.11, CLEC-66, CLEC-260, CLEC-28, CLEC-27, CLEC-123, CLEC-26, CLEC-25, CLEC-60, CLEC-22, CLEC-166, CLEC-198, CLEC-224, CLEC-222, CLEC-119, CLEC-117, CLEC-80, CLEC-7, CLEC-194, CLEC-76, CLEC-4, CLEC-71, CLEC-151, CLEC-36, CLEC-72, CLEC-35, CLEC-73, CLEC-154, CLEC-31, CLEC-153, CLEC-33, CLEC-79, CLEC-149, CLEC-48, CLEC-85, CLEC-184, CLEC-83, CLEC-143, CLEC-180, CLEC-41, CLEC-40, CLEC-…	640	251	5537	1.99917	3.81278e-05	6.35473e-06	0.000257346
PIR_SUPERFAMILY	PIRSF000675:tyrosine-protein kinase	12	0.484848	2.17383e-07	R11E3.1, C35E7.10, C55C3.4, ZK622.1, SPE-8, F59A3.8, W03F8.2, ZC581.7, F26E4.5, F22B3.8, KIN-5, C25A8.5	512	17	4541	6.26057	7.43423e-05	3.71718e-05	0.000296288
SP_PIR_KEYWORDS	cytoskeleton	37	1.49495	5.10279e-07	F38H4.6, MSP-31, Y48B6A.5, MSP-33, Y53C10A.15, MSP-36, MSP-38, MSP-113, C15H11.1, ARX-7, MSP-3, C10H11.7, C35E7.9, F13A7.1, MSP-40, CHE-13, MSP-152, T22B3.3, W03D8.5, Y53F4B.19, SPE-26, F21H7.5, MSP-142, F42A9.7, C14A4.8, MSP-56, MSP-57, MSP-59, F36D3.4, MSP-53, MSP-19, MSP-55, DCT-9, F58A6.9, MSP-10, ZK546.3, F36H12.3, MSP-64, MSP-63, MSP-65, F52F12.8, ZK354.7, MSP-45, F58E6.5, T05D4.5, C35A5.4,…	2404	125	19674	2.42242	0.000114806	5.74048e-05	0.000651902
UP_SEQ_FEATURE	domain:MSP	11	0.444444	5.7385e-07	MSP-56, F38H4.6, MSP-57, MSP-31, ZK1307.4, MSP-33, MSP-59, MSP-53, MSP-19, MSP-36, MSP-55, MSP-38, MSP-113, F58A6.9, MSP-10, MSP-64, MSP-63, MSP-3, MSP-65, SSP-11, SSP-10, MSP-40, MSP-152, MSP-45, SSP-16, MSP-81, MSP-49, MSP-79, MSP-78, MSP-77, MSP-76, MSP-51, MSP-50, MSP-142, ZK1307.3	288	18	3249	6.8941	0.000366049	0.000366049	0.000854651
GOTERM_BP_2	GO:0043170~macromolecule metabolic process	281	11.3535	6.18436e-07	VY10G11R.1, CKK-1, Y71H2AM.25, TAG-191, R10D12.10, ZK484.7, THK-1, DPF-2, NHR-7, Y19D10B.6, C14A4.13, C27D8.1, F54H5.2, SKR-15, T22C1.8, FBXB-54, NHR-140, NHR-147, C09B9.4, C07E3.4, F57B9.8, F42C5.5, F55H12.5, OLD-1, NAS-37, NAS-38, UNC-120, M7.7, KIN-21, KIN-24, NAS-31, C27D6.11, F55D12.6, T19D12.5, K04C1.5, NHR-116, B0207.7, C56C10.6, C08F11.7, T19D2.1, NAS-25, C33H5.16, TTLL-15, K09F6.3, C46A5…	756	2372	8116	1.27178	7.11177e-05	7.11177e-05	0.000704447
GOTERM_MF_2	GO:0016787~hydrolase activity	205	8.28283	6.56531e-07	Y71H2AM.25, ZK484.7, C31H1.5, CPI-1, Y19D10B.6, DPF-2, C29F5.3, ABT-5, T22C1.8, ZK643.2, ABT-1, Y62E10A.13, SUL-2, C07E3.4, F42C5.5, F55H12.5, NAS-37, NAS-38, PAF-1, NAS-31, SUL-3, ZK262.3, Y105C5B.15, F26B1.5, T16G12.7, R08C7.8, C08F11.7, NAS-25, T19D2.1, C33H5.16, GSP-3, GSP-4, Y48A6B.7, K09F6.3, C46A5.1, C08H9.1, F28E10.5, T04F3.3, Y54F10BM.3, QUA-1, T28A11.17, NAS-9, Y69A2AR.19, NAS-8, B0207.…	887	1508	8884	1.36156	3.08565e-05	1.02856e-05	0.000623585
PIR_SUPERFAMILY	PIRSF000908:serine/threonine-protein phosphatase, conventional type	15	0.606061	6.84839e-07	Y71G12B.30, F58G1.3, T16G12.7, F42G8.8, ZK938.1, GSP-4, C06A1.3, Y69E1A.4, F49E11.7, C34D4.2, F23B12.1, F52H3.6, F26B1.5, Y40H4A.2, R13A5.11	512	29	4541	4.58749	0.000234188	7.80687e-05	0.000933416
INTERPRO	IPR004296:Protein of unknown function DUF236	10	0.40404	7.55933e-07	C47E12.10, C04F12.6, C03C11.1, F27C1.3, MATH-46, ZC376.8, F47B3.4, C36F7.5, K07A1.5, R08A2.1	1438	13	13633	7.29271	0.000654424	3.11728e-05	0.00117244
GOTERM_BP_3	GO:0044260~cellular macromolecule metabolic process	239	9.65657	8.38875e-07	VY10G11R.1, CKK-1, TAG-191, R10D12.10, ZK484.7, THK-1, NHR-7, C14A4.13, C27D8.1, F54H5.2, SKR-15, T22C1.8, FBXB-54, NHR-140, NHR-147, C09B9.4, C07E3.4, F57B9.8, F42C5.5, F55H12.5, OLD-1, M7.7, UNC-120, KIN-21, KIN-24, C27D6.11, F55D12.6, T19D12.5, K04C1.5, NHR-116, B0207.7, C56C10.6, C33H5.16, TTLL-15, K09F6.3, C46A5.1, T04F3.3, Y54F10BM.3, F21F3.2, Y69A2AR.19, B0207.1, ODR-1, NEKL-4, F54D5.11, Y…	735	1969	7908	1.30596	0.000244922	8.16472e-05	0.00111636
GOTERM_BP_2	GO:0044238~primary metabolic process	347	14.0202	9.8199e-07	VY10G11R.1, CKK-1, C31H2.4, Y71H2AM.25, LYS-3, TAG-191, R10D12.10, ZK484.7, C31H1.5, THK-1, DPF-2, Y19D10B.6, NHR-7, C14A4.13, C27D8.1, F54H5.2, SKR-15, T22C1.8, ZK643.2, LYS-7, HDL-1, FBXB-54, NHR-140, K07E1.1, NHR-147, Y62E10A.13, C09B9.4, C07E3.4, F42C5.5, F57B9.8, F55H12.5, OLD-1, NAS-37, NAS-38, UNC-120, M7.7, PAF-1, UGT-2, KIN-21, UGT-54, KIN-24, NAS-31, ZK262.3, C27D6.11, F55D12.6, UGT-8, …	756	3059	8116	1.21778	0.000112923	5.64628e-05	0.00111856
GOTERM_MF_3	GO:0032553~ribonucleotide binding	153	6.18182	1.4015e-06	K06H7.8, VY10G11R.1, CKK-1, C18H7.4, ZK666.8, F26A1.3, TAG-191, CDK-4, R10D12.10, F01D4.3, THK-1, C03C10.2, C14A4.13, W06F12.3, C27D8.1, ABT-5, F54H5.2, CDK-2, W03F8.2, ABT-1, F26E4.5, FBXB-54, ZK596.2, HUM-4, CKB-3, C09B9.4, ZC581.7, F57B9.8, OLD-1, R13H9.5, M7.7, ZC581.2, M04C3.1, F26A1.4, KIN-21, KIN-24, F22B3.8, C27D6.11, T19D12.5, K04C1.5, B0207.7, C56C10.6, Y47G6A.13, Y69E1A.3, H05L14.1, KI…	695	1120	7243	1.42366	0.000121923	3.04822e-05	0.00151467
INTERPRO	IPR005514:Protein of unknown function DUF316	12	0.484848	2.2252e-06	C46E10.1, D1081.3, Y47H9B.2, R01H2.2, F15H9.1, F35E2.5, F25E5.4, Y116A8A.4, F35E2.9, Y71F9B.15, TRY-7, Y116A8A.6	1438	21	13633	5.41744	0.00192517	8.75883e-05	0.0034512
GOTERM_MF_2	GO:0001882~nucleoside binding	146	5.89899	2.25162e-06	K06H7.8, VY10G11R.1, CKK-1, C18H7.4, ZK666.8, F26A1.3, TAG-191, CDK-4, R10D12.10, F01D4.3, THK-1, C03C10.2, C14A4.13, W06F12.3, C27D8.1, ABT-5, F54H5.2, CDK-2, W03F8.2, ABT-1, F26E4.5, FBXB-54, ZK596.2, HUM-4, CKB-3, C09B9.4, ZC581.7, F57B9.8, OLD-1, R13H9.5, M7.7, ZC581.2, M04C3.1, F26A1.4, KIN-21, KIN-24, F22B3.8, C27D6.11, T19D12.5, K04C1.5, B0207.7, C56C10.6, Y47G6A.13, ACDH-5, Y69E1A.3, H05L…	887	1017	8884	1.43786	0.000105821	2.64562e-05	0.00213861
GOTERM_MF_5	GO:0032559~adenyl ribonucleotide binding	143	5.77778	6.95133e-06	K06H7.8, VY10G11R.1, CKK-1, C18H7.4, ZK666.8, F26A1.3, TAG-191, CDK-4, R10D12.10, F01D4.3, THK-1, C03C10.2, C14A4.13, W06F12.3, C27D8.1, ABT-5, F54H5.2, CDK-2, W03F8.2, ABT-1, F26E4.5, FBXB-54, ZK596.2, HUM-4, CKB-3, C09B9.4, ZC581.7, F57B9.8, OLD-1, R13H9.5, M7.7, ZC581.2, M04C3.1, F26A1.4, KIN-21, KIN-24, F22B3.8, C27D6.11, T19D12.5, K04C1.5, B0207.7, C56C10.6, Y47G6A.13, Y69E1A.3, H05L14.1, KI…	540	944	4951	1.38888	0.000833814	0.000278015	0.00797936
GOTERM_MF_3	GO:0017076~purine nucleotide binding	157	6.34343	6.98015e-06	K06H7.8, VY10G11R.1, CKK-1, C18H7.4, ZK666.8, F26A1.3, TAG-191, CDK-4, R10D12.10, F01D4.3, THK-1, C03C10.2, C14A4.13, W06F12.3, C27D8.1, ABT-5, F54H5.2, CDK-2, W03F8.2, ABT-1, F26E4.5, FBXB-54, ZK596.2, HUM-4, CKB-3, C09B9.4, ZC581.7, F57B9.8, OLD-1, R13H9.5, M7.7, ZC581.2, M04C3.1, F26A1.4, KIN-21, KIN-24, F22B3.8, C27D6.11, T19D12.5, K04C1.5, B0207.7, C56C10.6, Y47G6A.13, ACDH-5, Y69E1A.3, H05L…	695	1187	7243	1.37842	0.000607091	0.000121448	0.00754361
INTERPRO	IPR008574:Protein of unknown function DUF856, Caenorhabditis species	7	0.282828	8.65496e-06	T16A9.5, F58A6.5, Y37D8A.5, W03D8.9, K06A5.2, Y69E1A.1, W03D8.10	1438	7	13633	9.48053	0.00746721	0.000325827	0.0134229
GOTERM_MF_2	GO:0030246~carbohydrate binding	38	1.53535	9.20345e-06	LEC-7, CLEC-149, CLEC-85, UGT-41, CLEC-83, UGT-25, CLEC-180, UGT-47, CLEC-166, UGT-40, F54C1.1, C53D6.7, CLEC-43, Y73F4A.3, Y73F4A.2, CLEC-10, UGT-16, CLEC-117, CLEC-80, CLEC-139, AMAN-3, CLEC-173, UGT-11, UGT-30, CLEC-170, UGT-2, CLEC-71, UGT-13, UGT-54, CLEC-72, UGT-36, CLEC-73, CLEC-52, CLEC-51, CLEC-79, CLEC-53, UGT-8, UGT-7	887	177	8884	2.15028	0.00043247	8.65091e-05	0.00874128
GOTERM_MF_4	GO:0030554~adenyl nucleotide binding	146	5.89899	1.22474e-05	K06H7.8, VY10G11R.1, CKK-1, C18H7.4, ZK666.8, F26A1.3, TAG-191, CDK-4, R10D12.10, F01D4.3, THK-1, C03C10.2, C14A4.13, W06F12.3, C27D8.1, ABT-5, F54H5.2, CDK-2, W03F8.2, ABT-1, F26E4.5, FBXB-54, ZK596.2, HUM-4, CKB-3, C09B9.4, ZC581.7, F57B9.8, OLD-1, R13H9.5, M7.7, ZC581.2, M04C3.1, F26A1.4, KIN-21, KIN-24, F22B3.8, C27D6.11, T19D12.5, K04C1.5, B0207.7, C56C10.6, Y47G6A.13, ACDH-5, Y69E1A.3, H05L…	643	1009	6132	1.37992	0.00129739	0.000324507	0.013742
PIR_SUPERFAMILY	PIRSF016383:DUF856_CAE_spp	7	0.282828	1.25253e-05	T16A9.5, F58A6.5, Y37D8A.5, W03D8.9, K06A5.2, Y69E1A.1, W03D8.10	512	7	4541	8.86914	0.00427452	0.00107035	0.0170704
GOTERM_CC_1	GO:0005576~extracellular region	57	2.30303	3.0709e-05	INS-28, INS-24, INS-26, INS-7, INS-33, GPN-1, INS-1, PXN-1, INS-5, C03G6.5, INS-6, FLP-18, FLP-19, FLP-14, EPI-1, INS-19, NLP-13, C08F11.12, FLP-13, NAS-37, NAS-38, INS-22, DAF-28, NAS-31, ZK262.3, VAP-1, COL-14, ASM-2, SCL-25, C27B7.7, SCL-23, SCL-24, SCL-21, DAF-7, C06A8.6, T19D2.1, NAS-25, FLP-3, FLP-1, CLEC-180, C44B12.6, SCL-6, C07A4.3, NAS-9, NAS-8, SCL-3, NLP-31, SCL-14, SCL-17, Y73F4A.2, …	1012	311	9662	1.74985	0.000337747	0.000337747	0.0191286
INTERPRO	IPR008498:Protein of unknown function DUF780, Caenorhabditis species	7	0.282828	3.15099e-05	NSPD-7, NSPD-6, NSPD-5, NSPD-4, NSPD-9, NSPD-10, NSPD-1, NSPD-2, NSPD-3	1438	8	13633	8.29546	0.0269191	0.00113636	0.0488603
INTERPRO	IPR008271:Serine/threonine protein kinase, active site	43	1.73737	3.9939e-05	PRK-2, K06H7.8, T19D12.5, K04C1.5, CKK-1, F26A1.3, ZK666.8, Y47G6A.13, CDK-4, C08F8.6, D2045.5, R02C2.1, C03C10.2, T15B12.2, W06F12.3, CDK-2, F41G3.5, C55C3.8, C04G2.2, W02B12.12, TAG-344, ZK596.2, F21F3.2, C39H7.1, ZK354.6, GSKA-3, W01B6.2, Y39G8B.5, NEKL-4, NEKL-1, R13H9.5, F39F10.3, ZC581.2, C50F4.10, F26A1.4, TTN-1, Y38H8A.4, Y38H8A.3, F49C5.4, F32B6.10, K11C4.1, Y106G6E.1, C27D6.11	1438	212	13633	1.92294	0.0339965	0.00138256	0.0619269
GOTERM_BP_2	GO:0044237~cellular metabolic process	302	12.202	5.05838e-05	VY10G11R.1, CKK-1, C31H2.4, TAG-191, R10D12.10, ZK484.7, C31H1.5, THK-1, NHR-7, C14A4.13, C27D8.1, F54H5.2, SKR-15, T22C1.8, ZK643.2, HDL-1, FBXB-54, NHR-140, K07E1.1, NHR-147, Y62E10A.13, C09B9.4, C07E3.4, F57B9.8, F42C5.5, F55H12.5, OLD-1, UNC-120, M7.7, CYC-2.2, UGT-2, KIN-21, UGT-54, KIN-24, C27D6.11, F55D12.6, UGT-8, UGT-7, T19D12.5, GST-42, K04C1.5, NHR-116, LPD-8, B0207.7, C56C10.6, C33H5.…	756	2709	8116	1.19679	0.0058004	0.00193722	0.0576039
UP_SEQ_FEATURE	signal peptide	61	2.46465	5.78109e-05	HIM-4, B0228.1, CPG-8, INS-7, F02A9.1, T05H10.3, INS-1, PXN-1, INS-5, C03G6.5, INS-6, COL-13, COL-12, ABF-2, FLP-18, FLP-19, ABF-1, FLP-14, EPI-1, C08F11.12, FLP-13, NAS-37, GLC-2, BLI-1, NAS-38, K07C11.7, COL-145, INS-22, TAG-209, NAS-31, ZK262.3, K03H1.5, ASM-2, C05G5.5, DES-2, C35D10.10, C27B7.7, T16H12.9, DAF-7, NAS-25, GLR-2, PAT-2, FLP-3, LGC-4, FLP-1, B0416.2, CLEC-180, NAS-9, NAS-8, NLP-3…	288	422	3249	1.6307	0.0362125	0.0182732	0.0860652
GOTERM_BP_5	GO:0030259~lipid glycosylation	14	0.565657	8.07544e-05	UGT-16, UGT-41, UGT-11, UGT-30, UGT-2, UGT-13, UGT-54, UGT-36, UGT-25, UGT-47, UGT-8, F54C1.1, UGT-40, UGT-7	606	44	6749	3.54358	0.0330371	0.00669651	0.11322
GOTERM_BP_FAT	GO:0030259~lipid glycosylation	14	0.565657	0.000114206	UGT-16, UGT-41, UGT-11, UGT-30, UGT-2, UGT-13, UGT-54, UGT-36, UGT-25, UGT-47, UGT-8, F54C1.1, UGT-40, UGT-7	727	44	7838	3.43041	0.086903	0.015038	0.175048
[truncated: 175 more rows]

## Sheet: AWK43.g2_vs_AWK33.g1
Category	Term	Count	%	PValue	Genes	List Total	Pop Hits	Pop Total	Fold Enrichment	Bonferroni	Benjamini	FDR
[truncated: 407 more rows]

## Sheet: AWK107.g3_vs_AWK33.g1
Category	Term	Count	%	PValue	Genes	List Total	Pop Hits	Pop Total	Fold Enrichment	Bonferroni	Benjamini	FDR
[truncated: 268 more rows]

[truncated: 1 more sheets: AWK107.g3_vs_AWK43.g2]
